# Supplementary material for: The cytochalasans: potent fungal natural products with application from bench to bedside
Source: Royal Society of Chemistry journal article supplement (doi:10.1039/d4np00076e), 2025-01-01
Supplement: d4np00076e1.xlsx [file d4np00076e1.xlsx]

## Sheet: Table of Contents
	Cytochalasans Derived from Fungi: Structural Diversity, Biosynthesis, and Therapeutic Potentials
	Table of contents:
	Table S1. Predicted pharmacokinetics and ADMET of 410 cytochalasans derived from fungi, as well as their reported biological activities.

## Sheet: Table_S1
Table S1. Predicted pharmacokinetics and ADMET of 410 cytochalasans derived from fungi, as well as their reported biological activities.
			Biological Activities									SwissADME (http://www.swissadme.ch/)
#	SMILES	NAME	IC50 cancer cell (μM)	Antibacterial activity MIC μg/mL	Antifungal activity	Anti-inflammatory IC50 ()	Antiviral	Other	Source	Fungal Genera	Scaffold	Canonical SMILES	Formula	MW	#Heavy atoms	#Aromatic heavy atoms	Fraction Csp3	#Rotatable bonds	#H-bond acceptors	#H-bond donors	MR	TPSA	iLOGP	XLOGP3	WLOGP	MLOGP	Silicos-IT Log P	Consensus Log P	ESOL Log S	ESOL Solubility (mg/ml)	ESOL Solubility (mol/l)	ESOL Class	Ali Log S	Ali Solubility (mg/ml)	Ali Solubility (mol/l)	Ali Class	Silicos-IT LogSw	Silicos-IT Solubility (mg/ml)	Silicos-IT Solubility (mol/l)	Silicos-IT class	GI absorption	BBB permeant	Pgp substrate	CYP1A2 inhibitor	CYP2C19 inhibitor	CYP2C9 inhibitor	CYP2D6 inhibitor	CYP3A4 inhibitor	log Kp (cm/s)
1	O=C1O[C@@]23[C@@]([C@H](CC4=CC=CC=C4)NC3=O)([H])[C@H](C)C(CO)=C[C@@H]2/C=C/C[C@H](C)CCC[C@@H](O)/C=C/1	Cytochalasin Z2			Lower phytotoxic effect on C. arvense leaves				Aspergillus	Aspergillus		OCC1=C[C@@H]2/C=C/C[C@H](C)CCC[C@H](/C=C/C(=O)O[C@]32[C@@H]([C@@H]1C)[C@H](Cc1ccccc1)NC3=O)O	C29H37NO5	479.61	35	6	0.52	3	5	3	139.96	95.86	3.44	3.24	3.11	3.03	2.85	3.13	-4.78	7.89e-03	1.65e-05	Moderately soluble	-4.93	5.68e-03	1.18e-05	Moderately soluble	-4.95	5.43e-03	1.13e-05	Moderately soluble	High	No	Yes	No	No	No	No	Yes	-6.93
2	O=C(/C=C/[C@H](O)CCC[C@@H](C)C/C=C/1)O[C@]2([C@@H]1[C@@H]3O)[C@@]([C@H](CC4=CC=CC=C4)NC2=O)([H])[C@H](C)C3=C	Cytochalasin B	Antiproliferative effect against HUVEC and K562 GI50 from 1.08 to 8.32		Lower phytotoxic effect on C. arvense leaves				Aspergillus	Aspergillus		C[C@@H]1CCC[C@@H](O)/C=C/C(=O)O[C@@]23[C@@H](/C=C/C1)[C@H](O)C(=C)[C@H]([C@H]3[C@@H](NC2=O)Cc1ccccc1)C	C29H37NO5	479.61	35	6	0.52	2	5	3	139.96	95.86	3.55	3.37	3.11	3.03	2.85	3.18	-4.93	5.62e-03	1.17e-05	Moderately soluble	-5.06	4.16e-03	8.68e-06	Moderately soluble	-4.95	5.43e-03	1.13e-05	Moderately soluble	High	No	Yes	No	No	No	No	Yes	-6.83
3	O=C(CC[C@H](O)CCC[C@@H](C)C/C=C/1)O[C@]2([C@@H]1[C@@H]3O)[C@@]([C@H](CC4=CC=CC=C4)NC2=O)([H])[C@H](C)C3=C	Dihydrocytochalasin B							Aspergillus	Aspergillus		O[C@@H]1CCC[C@@H](C)C/C=C/[C@@H]2[C@]3(OC(=O)CC1)C(=O)N[C@H]([C@@H]3[C@@H](C(=C)[C@H]2O)C)Cc1ccccc1	C29H39NO5	481.62	35	6	0.59	2	5	3	140.44	95.86	3.59	3.36	3.34	3.11	3.25	3.33	-4.94	5.56e-03	1.15e-05	Moderately soluble	-5.05	4.28e-03	8.89e-06	Moderately soluble	-5.41	1.87e-03	3.87e-06	Moderately soluble	High	No	Yes	No	No	No	No	Yes	-6.85
4	O=C1O[C@@]23[C@@]([C@H](CC4=CC=CC=C4)NC3=O)([H])C(C)=C(CO)[C@@H](O)[C@@H]2/C=C/C[C@H](C)CCC[C@@H](O)/C=C/1	Perenniporins A	Weak effect against SMMC-7721 and A549 of 23.3 and 37.6						Perenniporia	Other		OCC1=C(C)[C@H]2[C@H](Cc3ccccc3)NC(=O)[C@]32[C@H]([C@@H]1O)/C=C/C[C@H](C)CCC[C@H](/C=C/C(=O)O3)O	C29H37NO6	495.61	36	6	0.52	3	6	4	141.12	116.09	1.94	2.76	2.23	2.23	2.35	2.30	-4.58	1.31e-02	2.65e-05	Moderately soluble	-4.85	6.95e-03	1.40e-05	Moderately soluble	-4.57	1.33e-02	2.68e-05	Moderately soluble	High	No	Yes	No	No	No	No	Yes	-7.36
5	O=C1O[C@@]23[C@@]([C@H](CC4=CC=CC=C4)NC3=O)([H])[C@H](CO)C(C)=C[C@@H]2/C=C/C[C@H](C)CCC[C@@H](O)/C=C/1	Perenniporins B							Perenniporia	Other		OC[C@@H]1C(=C[C@H]2[C@]3([C@@H]1[C@H](Cc1ccccc1)NC3=O)OC(=O)/C=C/[C@H](O)CCC[C@H](C/C=C/2)C)C	C29H37NO5	479.61	35	6	0.52	3	5	3	139.96	95.86	3.63	3.27	3.11	3.03	2.85	3.18	-4.80	7.56e-03	1.58e-05	Moderately soluble	-4.96	5.29e-03	1.10e-05	Moderately soluble	-4.95	5.43e-03	1.13e-05	Moderately soluble	High	No	Yes	No	No	No	No	Yes	-6.90
6	O=C1O[C@@]23[C@@]([C@H](CC4=CC=CC=C4)NC3=O)([H])[C@H](C)C(CO)=C[C@@H]2/C=C/C[C@H](CO)CCC[C@@H](O)/C=C/1	Perenniporins C	Weak effect against SMMC-7721 and A549 of 23.3 and 37.6			Inhibition effect against NO production in LPS-activated macrophages of 18.4			Perenniporia	Other		OC[C@@H]1CCC[C@@H](O)/C=C/C(=O)O[C@@]23[C@@H](/C=C/C1)C=C(CO)[C@H]([C@H]3[C@@H](NC2=O)Cc1ccccc1)C	C29H37NO6	495.61	36	6	0.52	4	6	4	141.12	116.09	3.40	1.84	2.09	2.23	2.24	2.36	-3.93	5.81e-02	1.17e-04	Soluble	-3.90	6.26e-02	1.26e-04	Soluble	-4.37	2.11e-02	4.26e-05	Moderately soluble	High	No	Yes	No	No	No	No	Yes	-8.02
7	O=C1O[C@@]23[C@@]([C@H](CC4=CC=C(O)C=C4)NC3=O)([H])[C@H](C)C(C)=C[C@@H]2/C=C/C[C@@](C)(O)CCCC/C=C/1	Boerechalasins A				Inhibition of NO production of 21.9			Boeremia	Other		O=C1/C=C/CCCC[C@](C/C=C/[C@@H]2[C@]3(O1)C(=O)N[C@H]([C@@H]3[C@@H](C(=C2)C)C)Cc1ccc(cc1)O)(C)O	C29H37NO5	479.61	35	6	0.52	2	5	3	140.86	95.86	3.47	4.68	3.99	3.30	3.37	3.76	-5.76	8.40e-04	1.75e-06	Moderately soluble	-6.42	1.82e-04	3.80e-07	Poorly soluble	-5.38	2.01e-03	4.19e-06	Moderately soluble	High	No	Yes	No	No	No	No	Yes	-5.90
8	O=C1O[C@@]23[C@@]([C@H](CC4=CC=CC=C4)NC3=O)([H])[C@H](C)C(CO)=C[C@@H]2/C=C/C[C@@](C)(O)CCCC/C=C/1	Boerechalasins B							Boeremia	Other		OCC1=C[C@@H]2/C=C/C[C@@](C)(O)CCCC/C=C/C(=O)O[C@]32[C@@H]([C@@H]1C)[C@H](Cc1ccccc1)NC3=O	C29H37NO5	479.61	35	6	0.52	3	5	3	140.00	95.86	3.75	3.78	3.26	3.03	3.24	3.41	-5.12	3.61e-03	7.52e-06	Moderately soluble	-5.49	1.56e-03	3.26e-06	Moderately soluble	-5.39	1.93e-03	4.03e-06	Moderately soluble	High	No	Yes	No	No	No	No	Yes	-6.54
9	O=C1O[C@@]23[C@@]([C@H](CC4=CC=CC=C4)NC3=O)([H])[C@H](C)C(CO)=C[C@@H]2/C=C/C[C@H](C)CC[C@@H](O)C/C=C/1	Boerechalasins C							Boeremia	Other		OCC1=C[C@@H]2/C=C/C[C@H](C)CC[C@H](C/C=C/C(=O)O[C@]32[C@@H]([C@@H]1C)[C@H](Cc1ccccc1)NC3=O)O	C29H37NO5	479.61	35	6	0.52	3	5	3	139.96	95.86	3.76	3.85	3.11	3.03	2.85	3.32	-5.17	3.26e-03	6.79e-06	Moderately soluble	-5.56	1.32e-03	2.76e-06	Moderately soluble	-4.95	5.43e-03	1.13e-05	Moderately soluble	High	No	Yes	No	No	No	No	Yes	-6.49
10	O=C1O[C@@]23[C@@]([C@H](CC4=CC=CC=C4)NC3=O)([H])C(C)=C(C)[C@@H](O)[C@@H]2/C=C/C[C@@](C)(O)CCCC/C=C/1	Boerechalasins D							Boeremia	Other		O=C1/C=C/CCCC[C@](C/C=C/[C@@H]2[C@]3(O1)C(=O)N[C@H]([C@@H]3C(=C([C@H]2O)C)C)Cc1ccccc1)(C)O	C29H37NO5	479.61	35	6	0.52	2	5	3	140.00	95.86	3.64	3.34	3.40	3.03	3.35	3.35	-4.91	5.86e-03	1.22e-05	Moderately soluble	-5.03	4.47e-03	9.33e-06	Moderately soluble	-5.60	1.21e-03	2.53e-06	Moderately soluble	High	No	Yes	No	No	No	No	Yes	-6.85
11	CC1=C[C@H]2[C@@]3(C(C=CCCCC[C@H](CO)C/C=C/2)=O)[C@@]([C@H](CC4=CC=C(O)C=C4)NC3=O)([H])[C@@H]1C	Boerechalasins E				Inhibition of NO production of 5.7			Boeremia	Other		OC[C@H]1CCCCC=CC(=O)[C@@]23[C@@H](/C=C/C1)C=C(C)[C@H]([C@H]3[C@@H](NC2=O)Cc1ccc(cc1)O)C	C29H37NO4	463.61	34	6	0.52	3	4	3	139.44	86.63	3.27	4.89	4.12	3.30	3.68	3.85	-5.73	8.68e-04	1.87e-06	Moderately soluble	-6.44	1.66e-04	3.59e-07	Poorly soluble	-5.45	1.63e-03	3.52e-06	Moderately soluble	High	No	Yes	No	No	Yes	No	Yes	-5.66
12	O=C(/C=C/[C@@H](O)CCC[C@@H](C)C/C=C/1)O[C@]2([C@@H]1[C@@H]3O)[C@@]([C@H](CCS(C)=O)NC2=O)([H])[C@H](C)C3=C	Boerechalasins F	Cytotoxic effect of 22.8 against MCF-7						Boeremia	Other		C[C@@H]1CCC[C@H](O)/C=C/C(=O)O[C@@]23[C@@H](/C=C/C1)[C@H](O)C(=C)[C@H]([C@H]3[C@@H](NC2=O)CCS(=O)C)C	C25H37NO6S	479.63	33	0	0.68	3	6	3	133.37	132.14	3.10	0.87	2.50	1.59	0.98	1.81	-3.16	3.29e-01	6.86e-04	Soluble	-3.23	2.83e-01	5.90e-04	Soluble	-3.24	2.77e-01	5.77e-04	Soluble	High	No	Yes	No	No	No	No	Yes	-8.61
13	O=C(/C=C/[C@@H](O)CCC[C@@H](C)C/C=C/1)O[C@]2([C@@H]1[C@@H]3O)[C@@]([C@H](CC4=CC=CC=C4)N([C@H]5[C@@H](C)C[C@H](O)[C@@H](O)[C@@H]5O)C2=O)([H])[C@H](C)C3=C	Boerechalasins G							Boeremia	Other		C[C@@H]1CCC[C@H](O)/C=C/C(=O)O[C@]23[C@@H](/C=C/C1)[C@H](O)C(=C)[C@H]([C@H]2[C@@H](N(C3=O)[C@H]1[C@@H](C)C[C@@H]([C@H]([C@@H]1O)O)O)Cc1ccccc1)C	C36H49NO8	623.78	45	6	0.61	3	8	5	175.08	147.76	3.90	2.69	2.31	1.96	1.39	2.45	-5.30	3.11e-03	4.98e-06	Moderately soluble	-5.45	2.24e-03	3.58e-06	Moderately soluble	-3.23	3.68e-01	5.90e-04	Soluble	Low	No	Yes	No	No	No	No	No	-8.20
14	O=C(/C=C/C1=O)O[C@]2([C@@H](/C=C/C[C@H](C)CCC1)[C@@H]3O)[C@@]([C@H](CC4=CC=CC=C4)NC2=O)([H])[C@H](C)C3=C	Cytochalasin A							Aspergillus	Aspergillus		C[C@@H]1CCCC(=O)/C=C/C(=O)O[C@@]23[C@@H](/C=C/C1)[C@H](O)C(=C)[C@H]([C@H]3[C@@H](NC2=O)Cc1ccccc1)C	C29H35NO5	477.59	35	6	0.48	2	5	2	139.00	92.70	3.17	3.28	3.32	2.95	3.44	3.23	-4.86	6.56e-03	1.37e-05	Moderately soluble	-4.90	5.99e-03	1.25e-05	Moderately soluble	-5.64	1.09e-03	2.28e-06	Moderately soluble	High	No	Yes	No	No	No	No	Yes	-6.88
15	[H][C@@]1([C@H](CC2=CC=CC=C2)N3)[C@H](C)[C@]4(C)[C@@H](O4)C(/C=C/C[C@H](C)CCCC(/C=C/C(O5)=O)=O)[C@]15C3=O	Cytochalasins F			Lower phytotoxic effect on C. arvense leaves				Phoma	Phoma		C[C@@H]1CCCC(=O)/C=C/C(=O)O[C@@]23C(/C=C/C1)[C@@H]1O[C@]1(C)[C@H]([C@H]3[C@@H](NC2=O)Cc1ccccc1)C	C29H35NO5	477.59	35	6	0.55	2	5	1	137.32	85.00	3.56	4.47	3.56	3.03	3.89	3.70	-5.61	1.17e-03	2.44e-06	Moderately soluble	-5.97	5.06e-04	1.06e-06	Moderately soluble	-5.94	5.48e-04	1.15e-06	Moderately soluble	High	No	Yes	No	No	No	No	Yes	-6.04
16	[[H][C@@]1([C@H](CC2=CC=CC=C2)N3)[C@H](C)C(C)=CC(/C=C/C[C@H](C)CCC[C@@H](O)/C=C/C(O4)=O)[C@]14C3=O	Cytochalasins T							Phoma	Phoma				0.00	0	0	0.55	0	5	1	0.00	0.00	3.56	4.47	3.56	3.03	3.89	3.70	-5.61	1.17e-03	2.44e-06	Moderately soluble	-5.97	5.06e-04	1.06e-06	Moderately soluble	-5.94	5.48e-04	1.15e-06	Moderately soluble	High	No	Yes	No	No	No	No	Yes	-6.04
17	[H][C@@]([C@]12C(/C=C/C[C@H](C)CCC(O)C/C=C/C(O2)=O)[C@@H]3O)([C@H](CC4=CC=CC=C4)NC1=O)[C@H](C)C3=C	Cytochalasins Z3			Lower phytotoxic effect on C. arvense leaves				Phoma	Phoma		C[C@H]1C/C=C/C2[C@H](O)C(=C)[C@H]([C@@H]3[C@@]2(OC(=O)/C=C/CC(CC1)O)C(=O)N[C@H]3Cc1ccccc1)C	C29H37NO5	479.61	35	6	0.52	2	5	3	139.96	95.86	3.71	3.32	3.11	3.03	2.85	3.20	-4.90	6.04e-03	1.26e-05	Moderately soluble	-5.01	4.69e-03	9.79e-06	Moderately soluble	-4.95	5.43e-03	1.13e-05	Moderately soluble	High	No	Yes	No	No	No	No	Yes	-6.87
18	[H][C@@]([C@]12C(/C=C/C[C@H](C)CCC[C@@H](O)/C=C/C(O2)=O)[C@@H]3OC(C)=O)([C@H](CC4=CC=CC=C4)NC1=O)[C@H](C)C3=C	7-O-Acetylcytochalasin B							Phoma	Phoma		C[C@@H]1CCC[C@@H](O)/C=C/C(=O)O[C@@]23C(/C=C/C1)[C@H](OC(=O)C)C(=C)[C@H]([C@H]3[C@@H](NC2=O)Cc1ccccc1)C	C31H39NO6	521.64	38	6	0.52	4	6	2	149.70	101.93	3.88	3.94	3.68	3.35	3.35	3.64	-5.41	2.03e-03	3.90e-06	Moderately soluble	-5.78	8.65e-04	1.66e-06	Moderately soluble	-5.55	1.47e-03	2.82e-06	Moderately soluble	High	No	Yes	No	No	No	No	Yes	-6.68
19	[H][C@@]([C@]1(C(/C=C/[C@H](O)CCC[C@@H](C)C/C=C/2)=O)C2[C@@H]3O)([C@H](CC4=CC=CC=C4)NC1=O)[C@H](C)C3=C	Deoxaphomin			The highest level of toxicity on S. arvensis leaves				Phoma	Phoma		C[C@@H]1CCC[C@@H](O)/C=C/C(=O)[C@@]23C(/C=C/C1)[C@H](O)C(=C)[C@H]([C@H]3[C@@H](NC2=O)Cc1ccccc1)C	C29H37NO4	463.61	34	6	0.52	2	4	3	138.58	86.63	4.41	3.39	3.38	3.03	3.26	3.49	-4.85	6.57e-03	1.42e-05	Moderately soluble	-4.89	6.00e-03	1.29e-05	Moderately soluble	-5.22	2.78e-03	6.00e-06	Moderately soluble	High	No	Yes	No	No	No	No	Yes	-6.72
20	O=C(/C=C/[C@H](O)CCC[C@@H](C)C/C=C/1)O[C@]2([C@@H]1[C@@H]3O)[C@@]([C@H](CC4=C(O)C=CC=C4)NC2=O)([H])[C@H](C)C3=C	Cytochalasin Z4			Inactive phytotoxic				Aspergillus	Aspergillus		C[C@@H]1CCC[C@@H](O)/C=C/C(=O)O[C@@]23[C@@H](/C=C/C1)[C@H](O)C(=C)[C@H]([C@H]3[C@@H](NC2=O)Cc1ccccc1O)C	C29H37NO6	495.61	36	6	0.52	2	6	4	141.98	116.09	3.56	3.01	2.82	2.50	2.37	2.85	-4.80	7.85e-03	1.58e-05	Moderately soluble	-5.11	3.82e-03	7.72e-06	Moderately soluble	-4.35	2.20e-02	4.44e-05	Moderately soluble	High	No	Yes	No	No	No	No	Yes	-7.19
21	[H][C@@]([C@]12C(/C=C/C[C@H](C)CCC[C@@H](O)/C=C/C(O2)=O)[C@@H]3O)([C@H](CC4=CC=C(O)C=C4)NC1=O)[C@H](C)C3=C	Cytochalasins Z5			Inactive phytotoxic; 20 % mortality of brine shrimp				Phoma	Phoma		C[C@@H]1CCC[C@@H](O)/C=C/C(=O)O[C@@]23C(/C=C/C1)[C@H](O)C(=C)[C@H]([C@H]3[C@@H](NC2=O)Cc1ccc(cc1)O)C	C29H37NO6	495.61	36	6	0.52	2	6	4	141.98	116.09	3.39	3.01	2.82	2.50	2.37	2.82	-4.80	7.85e-03	1.58e-05	Moderately soluble	-5.11	3.82e-03	7.72e-06	Moderately soluble	-4.35	2.20e-02	4.44e-05	Moderately soluble	High	No	Yes	No	No	No	No	Yes	-7.19
22	[H][C@@]1([C@H](CC2=CC=CC=C2)N3)[C@H](C)[C@]4(C)[C@@H](O4)C(/C=C/C[C@H](C)CCC(O)C/C=C/C(O5)=O)[C@]15C3=O	Cytochalasins Z6			Weak inhibition effect of root elongation on tomato seedlings at concentration of 10-4 M,				Phoma	Phoma		C[C@H]1C/C=C/C2[C@@H]3O[C@]3(C)[C@H]([C@@H]3[C@@]2(OC(=O)/C=C/CC(CC1)O)C(=O)N[C@H]3Cc1ccccc1)C	C29H37NO5	479.61	35	6	0.59	2	5	2	138.28	88.16	3.68	4.51	3.35	3.11	3.30	3.59	-5.65	1.07e-03	2.24e-06	Moderately soluble	-6.08	3.97e-04	8.27e-07	Poorly soluble	-5.24	2.73e-03	5.70e-06	Moderately soluble	High	No	Yes	No	No	No	No	No	-6.02
23	[H][C@@]([C@]1(OC2=O)C(/C=C/C[C@H](C)CCCC(C3=C(C(C(O)([H])C4(O)[H])(C(N)=O)C4([H])C3OC)C=C2)=O)[C@@H]5O)([C@H](CC6=CC=CC=C6)NC1=O)[C@H](C)C5=C	Phomachalasins A			No phytotoxic agent when tested on L. esculentum, C. arvense, and E. repens, nor antifungal against C. tropicalis				Phoma	Phoma	The first example possessing 1,2,3,4,6,7-hexasubstituted bicycle[3.2.0]heptene conected to the macrocyclic ring	COC1C2=C(C3(C1C(O)C3O)C(=O)N)C=CC(=O)O[C@@]13C(=O)N[C@H]([C@@H]1[C@H](C)C(=C)[C@H](C3/C=C/C[C@@H](CCCC2=O)C)O)Cc1ccccc1	C38H46N2O9	674.78	49	6	0.53	4	9	5	183.62	185.48	2.40	1.11	1.47	0.97	1.76	1.54	-4.55	1.90e-02	2.82e-05	Moderately soluble	-4.60	1.70e-02	2.52e-05	Moderately soluble	-4.93	7.87e-03	1.17e-05	Moderately soluble	Low	No	No	No	No	No	No	No	-9.63
24	[H][C@@]([C@]1(C2=O)C(/C=C/C[C@H](C)CCCC(C3=C(C(C(O)C4O)(C(N)=O)C4([H])C3OC)C=C2)=O)[C@@H]5O)([C@H](CC6=CC=CC=C6)NC1=O)[C@H](C)C5=C	Phomachalasins B			No phytotoxic agent when tested on L. esculentum, C. arvense, and E. repens, nor antifungal against C. tropicalis				Phoma	Phoma	The first example possessing 1,2,3,4,6,7-hexasubstituted bicycle[3.2.0]heptene conected to the macrocyclic ring	COC1C2=C(C3(C1C(O)C3O)C(=O)N)C=CC(=O)[C@@]13C(=O)N[C@H]([C@@H]1[C@H](C)C(=C)[C@H](C3/C=C/C[C@@H](CCCC2=O)C)O)Cc1ccccc1	C38H46N2O8	658.78	48	6	0.53	4	8	5	182.23	176.25	3.11	1.79	1.74	0.92	2.18	1.95	-4.88	8.67e-03	1.32e-05	Moderately soluble	-5.11	5.11e-03	7.76e-06	Moderately soluble	-5.21	4.02e-03	6.10e-06	Moderately soluble	Low	No	No	No	No	No	No	No	-9.05
25	[H][C@@]([C@]1(OC2=O)C(/C=C/C[C@H](C)CCCC(C3=C(C(C([H])(O)C4([H])O)(C(N)=O)C4([H])C3OC)C=C2)=O)[C@@H]5O)([C@H](CC6=CC=CC=C6)NC1=O)[C@H](C)C5=C	Phomachalasins C			No phytotoxic agent when tested on L. esculentum, C. arvense, and E. repens, nor antifungal against C. tropicalis				Phoma	Phoma	The first example possessing 1,2,3,4,6,7-hexasubstituted bicycle[3.2.0]heptene conected to the macrocyclic ring	COC1C2=C(C3(C1C(O)C3O)C(=O)N)C=CC(=O)O[C@@]13C(=O)N[C@H]([C@@H]1[C@H](C)C(=C)[C@H](C3/C=C/C[C@@H](CCCC2=O)C)O)Cc1ccccc1	C38H46N2O9	674.78	49	6	0.53	4	9	5	183.62	185.48	2.40	1.11	1.47	0.97	1.76	1.54	-4.55	1.90e-02	2.82e-05	Moderately soluble	-4.60	1.70e-02	2.52e-05	Moderately soluble	-4.93	7.87e-03	1.17e-05	Moderately soluble	Low	No	No	No	No	No	No	No	-9.63
26	[H][C@@]([C@]1(OC2=O)C(/C=C/C[C@H](C)CCCC(C3=C(C(C([H])(O)C4(O)[H])(C(N)=O)C4([H])C3OC)C=C2)=O)[C@@H]5O)([C@H](CC6=CC=CC=C6)NC1=O)[C@H](C)C5=C	Phomachalasins D			No phytotoxic agent when tested on L. esculentum, C. arvense, and E. repens, nor antifungal against C. tropicalis				Phoma	Phoma	The first example possessing 1,2,3,4,6,7-hexasubstituted bicycle[3.2.0]heptene conected to the macrocyclic ring	COC1C2=C(C3(C1C(O)C3O)C(=O)N)C=CC(=O)O[C@@]13C(=O)N[C@H]([C@@H]1[C@H](C)C(=C)[C@H](C3/C=C/C[C@@H](CCCC2=O)C)O)Cc1ccccc1	C38H46N2O9	674.78	49	6	0.53	4	9	5	183.62	185.48	2.40	1.11	1.47	0.97	1.76	1.54	-4.55	1.90e-02	2.82e-05	Moderately soluble	-4.60	1.70e-02	2.52e-05	Moderately soluble	-4.93	7.87e-03	1.17e-05	Moderately soluble	Low	No	No	No	No	No	No	No	-9.63
27	[H][C@@]([C@]12[C@@H](/C=C/C[C@H](C)CCCC3=C(C([H])=O)SC(C(O2)=O)=C3)[C@@H]4O)([C@H](CC5=CC=CC=C5)NC1=O)[C@H](C)C4=C	Thiocytochalasins A	Moderate cytotoxic effect against HepG2, MCF-7, A549, CT26, HT-29 from 4.17 to 23.41						Phoma	Phoma	The first cytochalasan derivatives containing a thiophene moiety, possessing a novel 5/6/14/5 tetracyclic scaffold	O=Cc1sc2cc1CCC[C@@H](C)C/C=C/[C@@H]1[C@]3(OC2=O)C(=O)N[C@H]([C@@H]3[C@H](C)C(=C)[C@H]1O)Cc1ccccc1	C31H35NO5S	533.68	38	11	0.45	3	5	2	152.98	120.94	3.64	5.25	4.53	3.49	5.61	4.51	-6.47	1.80e-04	3.37e-07	Poorly soluble	-7.54	1.54e-05	2.89e-08	Poorly soluble	-7.05	4.70e-05	8.81e-08	Poorly soluble	Low	No	Yes	No	No	No	No	Yes	-5.83
28	[H][C@@]([C@]12[C@@H](/C=C/C[C@H](C)CCCC3=C(C(OC)OC)SC(C(O2)=O)=C3)[C@@H]4O)([C@H](CC5=CC=CC=C5)NC1=O)[C@H](C)C4=C	Thiocytochalasins B	Moderate cytotoxic effect against HepG2, MCF-7, A549, CT26, HT-29 from 4.17 to 23.41						Phoma	Phoma	The first cytochalasan derivatives containing a thiophene moiety, possessing a novel 5/6/14/5 tetracyclic scaffold	COC(c1sc2cc1CCC[C@@H](C)C/C=C/[C@@H]1[C@]3(OC2=O)C(=O)N[C@H]([C@@H]3[C@@H](C(=C)[C@H]1O)C)Cc1ccccc1)OC	C33H41NO6S	579.75	41	11	0.52	5	6	2	164.35	122.33	4.34	5.12	4.69	3.82	5.64	4.72	-6.53	1.72e-04	2.96e-07	Poorly soluble	-7.43	2.14e-05	3.69e-08	Poorly soluble	-7.35	2.57e-05	4.44e-08	Poorly soluble	Low	No	Yes	No	No	No	No	Yes	-6.20
31	O=C1N[C@@H](CC(C)C)[C@]2([H])[C@H](C)C(C)=C[C@@H]([C@@]321)C/C(C)=C\C[C@H](O)CC3=O	Periconiasins A	cytotoxicity against HCT-8 (0.9) and BGC-823 (2.1)						Periconia	Other	Unusual 9/6/5 tricyclic ring system	CC(C[C@@H]1NC(=O)[C@@]23[C@H]1[C@H](C)C(=C[C@@H]3C/C(=C\C[C@@H](CC2=O)O)/C)C)C	C22H33NO3	359.50	26	0	0.73	2	3	2	108.60	66.40	3.27	2.70	3.03	2.75	3.25	3.00	-3.64	8.28e-02	2.30e-04	Soluble	-3.75	6.43e-02	1.79e-04	Soluble	-3.98	3.76e-02	1.05e-04	Soluble	High	Yes	Yes	No	No	No	No	Yes	-6.58
32	O=C1N[C@@H](CC(C)C)[C@]2([H])[C@H](C)C(C)=C[C@@H]([C@@]321)C/C(C)=C\C[C@@H](O)CC3=O	Periconiasins B	cytotoxic effect towards HCT-8 (0.8), Bel-7402 (5.1) and BGC-823 (9.4)						Periconia	Other	Unusual 9/6/5 tricyclic ring system	CC(C[C@@H]1NC(=O)[C@@]23[C@H]1[C@H](C)C(=C[C@@H]3C/C(=C\C[C@H](CC2=O)O)/C)C)C	C22H33NO3	359.50	26	0	0.73	2	3	2	108.60	66.40	3.11	2.70	3.03	2.75	3.25	2.97	-3.64	8.28e-02	2.30e-04	Soluble	-3.75	6.43e-02	1.79e-04	Soluble	-3.98	3.76e-02	1.05e-04	Soluble	High	Yes	Yes	No	No	No	No	Yes	-6.58
33	O=C1N[C@@H](CC(C)C)[C@]2([H])[C@H](C)C(C)=C[C@@H]([C@@]321)C/C(C)=C\CC(CC3=O)=O	Periconiasins C	No cytotoxic against A549, BGC-823, Bel-7402, HCT-8, A2780						Periconia	Other	Unusual 9/6/5 tricyclic ring system	CC(C[C@@H]1NC(=O)[C@]23[C@H]1[C@H](C)C(=C[C@@H]2C/C(=C\CC(=O)CC3=O)/C)C)C	C22H31NO3	357.49	26	0	0.68	2	3	1	107.63	63.24	3.24	2.97	3.23	2.67	3.84	3.19	-3.80	5.72e-02	1.60e-04	Soluble	-3.96	3.91e-02	1.09e-04	Soluble	-4.68	7.54e-03	2.11e-05	Moderately soluble	High	Yes	Yes	No	No	No	No	Yes	-6.37
34	O=C1N[C@@H](CC(C)C)[C@]2([H])[C@H](C)C(C)=C[C@@]3([H])[C@@]21[C@@](C[C@@]4([H])C5)(O)[C@@]5([H])[C@@](O4)(C)C3	Periconiasins D	No cytotoxic against A549, BGC-823, Bel-7402, HCT-8, A2781		No anti-inflammatory activity				Periconia	Other		CC(C[C@@H]1NC(=O)[C@]23[C@H]1[C@H](C)C(=C[C@@H]2C[C@@]1([C@@H]2[C@@]3(O)C[C@@H](C2)O1)C)C)C	C22H33NO3	359.50	26	0	0.86	2	3	2	105.80	58.56	3.59	2.33	2.67	2.94	3.15	2.93	-3.40	1.42e-01	3.94e-04	Soluble	-3.20	2.27e-01	6.33e-04	Soluble	-3.81	5.53e-02	1.54e-04	Soluble	High	Yes	Yes	No	No	No	No	No	-6.84
35	O=C1N[C@@H](CC(C)C)[C@]2([H])[C@H](C)C(C)=C[C@@]3([H])[C@@]21[C@@](C[C@@H](O)C4)(O)[C@@]4([H])C(C)=C3	Periconiasins E	No cytotoxic against A549, BGC-823, Bel-7402, HCT-8, A2782		No anti-inflammatory activity		Weak ant-HIV effect 29.2 nM		Periconia	Other		CC(C[C@@H]1NC(=O)[C@]23[C@H]1[C@H](C)C(=C[C@@H]2C=C([C@@H]1[C@@]3(O)C[C@H](C1)O)C)C)C	C22H33NO3	359.50	26	0	0.77	2	3	3	107.48	69.56	3.15	1.94	2.43	2.84	2.65	2.60	-3.16	2.49e-01	6.93e-04	Soluble	-3.03	3.39e-01	9.44e-04	Soluble	-3.27	1.94e-01	5.41e-04	Soluble	High	Yes	Yes	No	No	No	No	No	-7.12
36	O=C1N[C@@H](CC(C)C)[C@]2([H])[C@H](C)C(C)=C[C@@]3([H])[C@@]21[C@@](C[C@@H](O)C4)(O)[C@@]4([H])C(C3)=C	Periconiasins F	No cytotoxic against A549, BGC-823, Bel-7402, HCT-8, A2783		No anti-inflammatory activity				Periconia	Other		CC(C[C@@H]1NC(=O)[C@]23[C@H]1[C@H](C)C(=C[C@@H]2CC(=C)[C@@H]1[C@@]3(O)C[C@H](C1)O)C)C	C22H33NO3	359.50	26	0	0.77	2	3	3	107.48	69.56	3.00	1.93	2.43	2.84	2.94	2.63	-3.15	2.53e-01	7.03e-04	Soluble	-3.01	3.48e-01	9.67e-04	Soluble	-3.52	1.10e-01	3.05e-04	Soluble	High	Yes	Yes	No	No	No	No	No	-7.12
37	O=C1[C@@]2(C(CC[C@H](C)C3)=O)[C@@H]3C=C(C)[C@@H](C)[C@@]2([H])[C@H](CC(C)C)N1	Periconiasins G	No cytotoxic against A549, BGC-823, Bel-7402, HCT-8, A2784				Weak antiviral activity against HIV of 67.0		Periconia	Other	Unusual 7/6/5 tricyclic ring system	CC(C[C@@H]1NC(=O)[C@@]23[C@H]1[C@H](C)C(=C[C@@H]3C[C@H](CCC2=O)C)C)C	C20H31NO2	317.47	23	0	0.80	2	2	1	98.29	46.17	3.16	3.72	3.35	3.25	3.66	3.43	-4.02	3.03e-02	9.55e-05	Moderately soluble	-4.38	1.32e-02	4.16e-05	Moderately soluble	-4.27	1.70e-02	5.35e-05	Moderately soluble	High	Yes	No	No	No	Yes	No	No	-5.60
38	O=C1N[C@@H](CC(C)C)[C@]2([H])[C@H](C)C(C)=C[C@@H]([C@@]321)C/C(C)=C\C[C@H](S(CC(C(OCC)=O)O)=O)CC3=O	Periconiasins H	No cytotoxic against A549, BGC-823, Bel-7402, HCT-8, A2785						Periconia	Other	Unpredicted sulfoxide group	CCOC(=O)C(CS(=O)[C@H]1C/C=C(/C)\C[C@@H]2[C@]3(C(=O)C1)C(=O)N[C@H]([C@@H]3[C@@H](C(=C2)C)C)CC(C)C)O	C27H41NO6S	507.68	35	0	0.74	8	6	2	142.19	128.98	4.11	2.02	3.57	1.99	3.02	2.94	-3.73	9.41e-02	1.85e-04	Soluble	-4.36	2.24e-02	4.41e-05	Moderately soluble	-4.79	8.20e-03	1.61e-05	Moderately soluble	High	No	Yes	No	No	No	No	Yes	-7.96
39	O=C1N[C@@H](CC(C)C)[C@]2([H])C(C)=C(C)[C@H](O)[C@]([C@@]321)([H])C/C(C)=C\C[C@H](O)CC3=O	Periconiasins I	Cytotoxic effect against MCF-7 of 4.8				No antiviral effect towards HIV		Periconia	Other	Possessing 9/6/5 tricyclic ring	CC(C[C@@H]1NC(=O)[C@@]23[C@H]1C(=C(C)[C@@H]([C@@H]3C/C(=C\C[C@@H](CC2=O)O)/C)O)C)C	C22H33NO4	375.50	27	0	0.73	2	4	3	109.76	86.63	2.29	1.18	2.14	1.92	2.76	2.06	-2.78	6.24e-01	1.66e-03	Soluble	-2.59	9.54e-01	2.54e-03	Soluble	-3.61	9.15e-02	2.44e-04	Soluble	High	No	Yes	No	No	No	No	No	-7.75
40	CC(C)C[C@H](N1)[C@]2([H])[C@H](C)C(C)=CC3[C@]2([C@@]4(O)[C@@](CC=C4)([H])C(C)=C3)C1=O	Periconiasins J	No cytotoxicity against MCF-7				Antiviral effect towards HIV of 25.0		Periconia	Other	Possessing 5/6/6/5 tetracyclic ring	CC(C[C@@H]1NC(=O)[C@]23[C@H]1[C@H](C)C(=CC2C=C([C@@H]1[C@@]3(O)C=CC1)C)C)C	C22H31NO2	341.49	25	0	0.68	2	2	2	105.85	49.33	3.18	2.74	3.23	3.60	3.14	3.18	-3.55	9.59e-02	2.81e-04	Soluble	-3.43	1.27e-01	3.71e-04	Soluble	-3.62	8.25e-02	2.42e-04	Soluble	High	Yes	Yes	No	No	Yes	No	No	-6.44
41	[H][C@@]1([C@H](CC2=CC=C(O)C=C2)N3)[C@H](C)C(C)=CC(/C=C/C[C@H](C)CCCC/C=C/C(O4)=O)[C@]14C3=O	Cytochalasin Z1							Pyrenophora	Other		C[C@@H]1CCCC/C=C/C(=O)O[C@@]23C(/C=C/C1)C=C(C)[C@H]([C@H]3[C@@H](NC2=O)Cc1ccc(cc1)O)C	C29H37NO4	463.61	34	6	0.52	2	4	2	139.66	75.63	3.76	5.62	4.88	4.11	3.88	4.45	-6.25	2.59e-04	5.58e-07	Poorly soluble	-6.97	4.95e-05	1.07e-07	Poorly soluble	-5.75	8.23e-04	1.77e-06	Moderately soluble	High	No	Yes	No	No	Yes	No	Yes	-5.14
42	[H][C@@]([C@@]12[C@@]3([H])[C@]4([H])[C@]([C@H]5C[C@@H](CO)C[C@]4(C)O5)([H])CC1=O)([C@H](CC(C)C)NC2=O)C(C)=C(C)C3=O	Pycnidiophorones A							Pycnidiophora	Other	The rare 5/6/6/5/6 pentacyclic skeleton	OC[C@@H]1C[C@H]2O[C@](C1)(C)[C@H]1[C@@H]2CC(=O)[C@@]23[C@@H]1C(=O)C(=C([C@H]3[C@@H](NC2=O)CC(C)C)C)C	C25H35NO5	429.55	31	0	0.80	3	5	2	120.59	92.70	3.30	1.52	2.05	1.74	3.44	2.41	-3.26	2.35e-01	5.46e-04	Soluble	-3.08	3.61e-01	8.41e-04	Soluble	-4.50	1.37e-02	3.20e-05	Moderately soluble	High	No	Yes	No	No	No	No	No	-7.84
43	[H][C@@]([C@@]12[C@@]3([H])[C@]4([H])[C@]([C@H]5C[C@@H](COC(C)=O)C[C@]4(C)O5)([H])CC1=O)([C@H](CC(C)C)NC2=O)C(C)=C(C)C3=O	Pycnidiophorones B	No cytotoxicity against A549; weak to mild cytotoxic against HeLa, PC-3, HepG-2 and HL-60 from 7.0 to 99.0						Pycnidiophora	Other	The rare 5/6/6/5/6 pentacyclic skeleton	CC(C[C@@H]1NC(=O)[C@@]23[C@H]1C(=C(C)C(=O)[C@@H]3[C@@H]1[C@H](CC2=O)[C@@H]2O[C@@]1(C)C[C@@H](C2)COC(=O)C)C)C	C27H37NO6	471.59	34	0	0.78	5	6	1	130.32	98.77	3.82	2.10	2.62	2.08	3.95	2.91	-3.76	8.26e-02	1.75e-04	Soluble	-3.80	7.40e-02	1.57e-04	Soluble	-5.10	3.71e-03	7.87e-06	Moderately soluble	High	No	Yes	No	No	No	No	No	-7.69
44	[H][C@@]1([C@H](CC(C)C)N2)C(C)=C(C)C[C@@]3([H])[C@]1(C(C[C@@]4([H])[C@]3([H])[C@]5(C)C[C@H](CO)C[C@H]4O5)=O)C2=O	Pycnidiophorones C	No cytotoxicity against PC-3 and HepG-2; weak to mild cytotoxic against HeLa, A549 and HL-60 from 7.0 to 99.0						Pycnidiophora	Other	The rare 5/6/6/5/6 pentacyclic skeleton	OC[C@@H]1C[C@H]2O[C@](C1)(C)[C@H]1[C@@H]2CC(=O)[C@@]23[C@@H]1CC(=C([C@H]3[C@@H](NC2=O)CC(C)C)C)C	C25H37NO4	415.57	30	0	0.84	3	4	2	120.39	75.63	3.57	2.13	2.87	2.65	3.74	2.99	-3.56	1.14e-01	2.75e-04	Soluble	-3.35	1.86e-01	4.47e-04	Soluble	-4.62	9.99e-03	2.40e-05	Moderately soluble	High	Yes	Yes	No	No	No	No	No	-7.32
45	[H][C@@]1([C@H](CC(C)C)N2)C(C)=C(C)C[C@@]3([H])[C@]1(C(C[C@@]4([H])[C@]3([H])[C@]5(C)C[C@H](COC(C)=O)C[C@H]4O5)=O)C2=O	Pycnidiophorones D	No cytotoxicity against PC-3, HepG-2 and HL-60; weak to mild cytotoxic against HeLa and A549 from 7.0 to 99.0						Pycnidiophora	Other	The rare 5/6/6/5/6 pentacyclic skeleton	CC(C[C@@H]1NC(=O)[C@@]23[C@H]1C(=C(C)C[C@@H]3[C@@H]1[C@H](CC2=O)[C@@H]2O[C@@]1(C)C[C@@H](C2)COC(=O)C)C)C	C27H39NO5	457.60	33	0	0.81	5	5	1	130.12	81.70	3.83	2.70	3.44	2.96	4.25	3.44	-4.05	4.10e-02	8.95e-05	Moderately soluble	-4.07	3.91e-02	8.54e-05	Moderately soluble	-5.23	2.69e-03	5.89e-06	Moderately soluble	High	No	Yes	No	No	No	No	No	-7.17
46	[H][C@@]1([C@H](CC2=CC=CC=C2)N3)C(C)=C(C)[C@@H](O)[C@H]4[C@]1(C(/C=C/[C@H](O)CCC[C@@H](C)C/C=C/4)=O)C3=O	Deoxaphomin B	Antiproliferative effect against HUVEC and K562 GI50 from 1.08 to 8.31; cytotoxic effect against against L929, HeLa, MCF-7, A549, PC-3 SKOV-3 and A431 from 1.55 to 6.91; inhibition effect towards F-actin network						Sparticola	Other		O[C@@H]1CCC[C@@H](C)C/C=C/[C@@H]2[C@]3(C(=O)/C=C/1)C(=O)N[C@H]([C@@H]3C(=C([C@H]2O)C)C)Cc1ccccc1	C29H37NO4	463.61	34	6	0.52	2	4	3	138.58	86.63	3.67	3.48	3.53	3.03	3.37	3.42	-4.91	5.76e-03	1.24e-05	Moderately soluble	-4.98	4.84e-03	1.04e-05	Moderately soluble	-5.42	1.75e-03	3.77e-06	Moderately soluble	High	No	Yes	No	No	No	No	Yes	-6.66
47	[H][C@@]([C@]1(C(/C=C/[C@H](OC(C)=O)CCC[C@@H](C)C/C=C/2)=O)[C@@H]2[C@@H]3O)([C@H](CC4=CC=CC=C4)NC1=O)[C@H](C)C3=C	Triseptatin	Antiproliferative effect against HUVEC and K562 GI50 from 1.08 to 8.32; cytotoxic effect against against L929, HeLa, MCF-7, A549, PC-3 SKOV-3 and A431 from 1.80 to 11.28; inhibition effect towards F-actin network						Sparticola	Other		C[C@@H]1CCC[C@H](/C=C/C(=O)[C@@]23[C@@H](/C=C/C1)[C@H](O)C(=C)[C@H]([C@H]3[C@@H](NC2=O)Cc1ccccc1)C)OC(=O)C	C31H39NO5	505.65	37	6	0.52	4	5	2	148.32	92.70	3.53	3.97	3.96	3.34	3.76	3.71	-5.33	2.35e-03	4.65e-06	Moderately soluble	-5.62	1.22e-03	2.41e-06	Moderately soluble	-5.83	7.53e-04	1.49e-06	Moderately soluble	High	No	Yes	No	No	No	No	Yes	-6.57
48	CC(C)C[C@H](N1)[C@@H]2[C@H](C)C(C)=C[C@H](/C=C(C)/C[C@H](CO)C3)[C@]2(C(CCC3=O)=O)C1=O	18-Oxo-19,20-dihydrophomacin C	No cytotoxicity against MCF-7, HepG2, A549, HT-29, SGC-7901	No antibacterial activity against the Gram-negative bacteria (S. typhimurium, P. vulgaris, E. aerogenes and E. coli) and the Gram-positive bacteria (S. enterica, B. anthracis, M. luteus and B. subtilis)					Westerdykella	Other		OC[C@H]1C/C(=C/[C@H]2C=C(C)[C@H]([C@@H]3[C@@]2(C(=O)CCC(=O)C1)C(=O)N[C@H]3CC(C)C)C)/C	C25H37NO4	415.57	30	0	0.72	3	4	2	123.22	83.47	3.50	2.28	3.23	2.47	3.85	3.07	-3.65	9.20e-02	2.21e-04	Soluble	-3.67	8.88e-02	2.14e-04	Soluble	-4.79	6.80e-03	1.64e-05	Moderately soluble	High	No	Yes	No	No	No	No	Yes	-7.22
49	CC(C)C[C@H](N1)[C@@H]2[C@H](C)C(C)=C[C@H](/C=C(C)/C[C@H](CO)C3)[C@]2(C(C[C@H](OC)C3=O)=O)C1=O	18-Oxo-19-methoxy-19,20-dihydrophomacin C	No cytotoxicity against MCF-7, HepG2, A549, HT-29, SGC-7902	No antibacterial activity against the Gram-negative bacteria (S. typhimurium, P. vulgaris, E. aerogenes and E. coli) and the Gram-positive bacteria (S. enterica, B. anthracis, M. luteus and B. subtilis)					Westerdykella	Other		OC[C@H]1C/C(=C/[C@H]2C=C(C)[C@H]([C@@H]3[C@@]2(C(=O)C[C@@H](C(=O)C1)OC)C(=O)N[C@H]3CC(C)C)C)/C	C26H39NO5	445.59	32	0	0.73	4	5	2	129.11	92.70	3.04	2.26	2.86	1.86	3.52	2.71	-3.76	7.70e-02	1.73e-04	Soluble	-3.84	6.39e-02	1.44e-04	Soluble	-4.66	9.86e-03	2.21e-05	Moderately soluble	High	No	Yes	No	No	No	No	Yes	-7.41
50	CC(C)C[C@H](N1)[C@@H]2[C@H](C)C(C)=C[C@H](/C=C(C)/C[C@H](CO)C3)[C@]2(C(C[C@@H](O)C3=O)=O)C1=O	18-Oxo-19-hydroxyl-19,20-dihydrophomacin C	No cytotoxicity against MCF-7, HepG2, A549, HT-29, SGC-7903	No antibacterial activity against the Gram-negative bacteria (S. typhimurium, P. vulgaris, E. aerogenes and E. coli) and the Gram-positive bacteria (S. enterica, B. anthracis, M. luteus and B. subtilis)					Westerdykella	Other		OC[C@H]1C/C(=C/[C@H]2C=C(C)[C@H]([C@@H]3[C@@]2(C(=O)C[C@H](C(=O)C1)O)C(=O)N[C@H]3CC(C)C)C)/C	C25H37NO5	431.56	31	0	0.72	3	5	3	124.38	103.70	3.01	1.73	2.20	1.66	2.96	2.31	-3.41	1.69e-01	3.91e-04	Soluble	-3.52	1.29e-01	2.99e-04	Soluble	-3.97	4.67e-02	1.08e-04	Soluble	High	No	Yes	No	No	No	No	Yes	-7.70
51	CC(C)C[C@H](N1)[C@@H]2[C@H](C)C(C)=C[C@H]3[C@]2(C(CC[C@@H](O)C[C@@H](CO)C/C(C)=C/3)=O)C1=O	19,20-Dihydrophomacin C	Mild cytotoxicity against HT-29 of 55.5	No antibacterial activity against the Gram-negative bacteria (S. typhimurium, P. vulgaris, E. aerogenes and E. coli) and the Gram-positive bacteria (S. enterica, B. anthracis, M. luteus and B. subtilis)					Westerdykella	Other		OC[C@@H]1C[C@H](O)CCC(=O)[C@@]23[C@@H](/C=C(/C1)\C)C=C(C)[C@H]([C@H]3[C@@H](NC2=O)CC(C)C)C	C25H39NO4	417.58	30	0	0.76	3	4	3	124.18	86.63	3.62	2.69	3.02	2.56	3.26	3.03	-3.93	4.95e-02	1.19e-04	Soluble	-4.16	2.88e-02	6.89e-05	Moderately soluble	-4.09	3.39e-02	8.13e-05	Moderately soluble	High	No	Yes	No	No	No	No	Yes	-6.94
52	CC(C)C[C@H](N1)[C@@H]2[C@H](C)C(C)=C[C@H]3[C@]2(C(C[C@H](OC)[C@@H](O)C[C@@H](CO)C/C(C)=C/3)=O)C1=O	19-Methoxy-19,20-dihydrophomacin C	Moderate cytotoxicity against MCF-7, HepG2, A549, HT-29, SGC-7903 from 25.6 to 83.7	No antibacterial activity against the Gram-negative bacteria (S. typhimurium, P. vulgaris, E. aerogenes and E. coli) and the Gram-positive bacteria (S. enterica, B. anthracis, M. luteus and B. subtilis)					Westerdykella	Other		OC[C@H]1C/C(=C/[C@H]2C=C(C)[C@H]([C@@H]3[C@@]2(C(=O)C[C@@H]([C@H](C1)O)OC)C(=O)N[C@H]3CC(C)C)C)/C	C26H41NO5	447.61	32	0	0.77	4	5	3	130.07	95.86	3.89	2.26	2.65	1.95	2.93	2.74	-3.77	7.52e-02	1.68e-04	Soluble	-3.91	5.51e-02	1.23e-04	Soluble	-3.96	4.93e-02	1.10e-04	Soluble	High	No	Yes	No	No	No	No	Yes	-7.43
53	CC(C)C[C@H](N1)[C@@H]2[C@H](C)C(C)=C[C@H]3[C@]2(C(C[C@H](O)[C@@H](O)C[C@@H](CO)C/C(C)=C/3)=O)C1=O	19-Hydroxyl-19,20- dihydrophomacin C	Mild cytotoxicity against HT-29 of 49.1	No antibacterial activity against the Gram-negative bacteria (S. typhimurium, P. vulgaris, E. aerogenes and E. coli) and the Gram-positive bacteria (S. enterica, B. anthracis, M. luteus and B. subtilis)					Westerdykella	Other		OC[C@H]1C/C(=C/[C@H]2C=C(C)[C@H]([C@@H]3[C@@]2(C(=O)C[C@@H]([C@H](C1)O)O)C(=O)N[C@H]3CC(C)C)C)/C	C25H39NO5	433.58	31	0	0.76	3	5	4	125.34	106.86	3.89	2.26	1.99	1.95	2.93	2.74	-3.77	7.52e-02	1.68e-04	Soluble	-3.91	5.51e-02	1.23e-04	Soluble	-3.96	4.93e-02	1.10e-04	Soluble	High	No	Yes	No	No	No	No	Yes	-7.43
54	CC(C)C[C@H](N1)C2[C@H](C)C(C)=C[C@H](/C=C(C)/C[C@H](CO)C[C@H](O)/C=C/3)[C@]2(OC3=O)C1=O	Phomacin B	Moderate cytotoxicity against MCF-7, HepG2, A549, HT-29, SGC-7903 from 25.6 to 83.7	No antibacterial activity against the Gram-negative bacteria (S. typhimurium, P. vulgaris, E. aerogenes and E. coli) and the Gram-positive bacteria (S. enterica, B. anthracis, M. luteus and B. subtilis)					Westerdykella	Other		OC[C@H]1C/C(=C/[C@H]2C=C(C)[C@H](C3[C@@]2(OC(=O)/C=C/[C@H](C1)O)C(=O)N[C@H]3CC(C)C)C)/C	C25H37NO5	431.56	31	0	0.68	3	5	3	125.09	95.86	3.24	2.68	2.53	2.47	2.46	2.67	-4.01	4.26e-02	9.86e-05	Moderately soluble	-4.35	1.95e-02	4.52e-05	Moderately soluble	-3.35	1.93e-01	4.48e-04	Soluble	High	No	Yes	No	No	No	No	Yes	-7.03
55	CC(C)C[C@H](N1)[C@@H]2[C@H](C)C(C)=C[C@H]3[C@]2(C(C[C@]4([H])[C@H]5C[C@@H](CO)C[C@](C)(O5)[C@]34[H])=O)C1=O	16-Hydroxymethylaspergillin PZ		Moderate antibacterial effect against (P. vulgaris and E. aerogenes) and B. subtilis					Westerdykella	Other		OC[C@@H]1C[C@H]2O[C@](C1)(C)[C@H]1[C@@H]2CC(=O)[C@@]23[C@@H]1C=C(C)[C@H]([C@H]3[C@@H](NC2=O)CC(C)C)C	C25H37NO4	415.57	30	0	0.84	3	4	2	120.39	75.63	3.50	2.54	2.73	2.65	3.35	2.95	-3.82	6.31e-02	1.52e-04	Soluble	-3.78	6.97e-02	1.68e-04	Soluble	-4.17	2.81e-02	6.76e-05	Moderately soluble	High	Yes	Yes	No	No	No	No	No	-7.03
56	CC(C)C[C@H](N1)[C@@H]2[C@H](C)C(C)=C[C@H]3[C@]2(OC(/C=C/[C@@H](O)C[C@@H](C)C/C(C)=C/3)=O)C1=O	16α-Methylaspochalasin J		Moderate antibacterial effect against (P. vulgaris and E. aerogenes) and B. subtilis					Westerdykella	Other		CC(C[C@@H]1NC(=O)[C@@]23[C@H]1[C@H](C)C(=C[C@@H]3/C=C(\C)/C[C@@H](C[C@@H](/C=C/C(=O)O2)O)C)C)C	C25H37NO4	415.57	30	0	0.68	2	4	2	123.93	75.63	3.75	3.90	3.55	3.28	3.06	3.51	-4.74	7.54e-03	1.81e-05	Moderately soluble	-5.19	2.71e-03	6.51e-06	Moderately soluble	-3.92	4.97e-02	1.20e-04	Soluble	High	Yes	Yes	No	No	No	No	Yes	-6.07
57	O=C1N[C@@H](CC(C)C)[C@]2([H])[C@H](C)C(C)=C[C@]([C@@]321)([H])/C=C(C)/CCC(O)C(O)C(NC4=CC=CC=C4C(N[C@H](C)C(N/C=C/C5=CNC6=C5C=CC=C6)=O)=O)CC3=O	Aspochalamins A	weak to mild cytotoxic effect against HMO2, MCF7, HepG2 and Huh7	Weak antibacterial effect against the examined against Gram-positive bacteria					Aspergillus	Aspergillus		CC(C[C@@H]1NC(=O)[C@@]23[C@H]1[C@H](C)C(=C[C@@H]3/C=C(\C)/CCC(C(C(CC2=O)Nc1ccccc1C(=O)N[C@@H](C(=O)N/C=C/c1c[nH]c2c1cccc2)C)O)O)C)C	C44H55N5O6	749.94	55	15	0.45	11	6	7	220.09	172.65	3.80	5.58	4.95	2.10	5.10	4.31	-7.48	2.48e-05	3.30e-08	Poorly soluble	-8.97	8.09e-07	1.08e-09	Poorly soluble	-9.53	2.23e-07	2.97e-10	Poorly soluble	Low	No	Yes	No	No	No	No	Yes	-6.91
58	O=C1N[C@@H](CC(C)C)[C@]2([H])[C@H](C)C(C)=C[C@]([C@@]321)([H])/C=C(C)/CCC(O)C(O)C(NC4=CC=CC=C4C(N[C@H](C)C(N/C=C/C5=CNC6=C5C=CC=C6)=O)=O)CC3=O	Aspochalamins B	weak to mild cytotoxic effect against HMO2, MCF7, HepG2 and Huh8	Weak antibacterial effect against the examined against Gram-positive bacteria					Aspergillus	Aspergillus		CC(C[C@@H]1NC(=O)[C@@]23[C@H]1[C@H](C)C(=C[C@@H]3/C=C(\C)/CCC(C(C(CC2=O)Nc1ccccc1C(=O)N[C@@H](C(=O)N/C=C/c1c[nH]c2c1cccc2)C)O)O)C)C	C44H55N5O6	749.94	55	15	0.45	11	6	7	220.09	172.65	3.80	5.58	4.95	2.10	5.10	4.31	-7.48	2.48e-05	3.30e-08	Poorly soluble	-8.97	8.09e-07	1.08e-09	Poorly soluble	-9.53	2.23e-07	2.97e-10	Poorly soluble	Low	No	Yes	No	No	No	No	Yes	-6.91
59	O=C1N[C@@H](CC(C)C)[C@]2([H])[C@H](C)C(C)=C[C@]([C@@]321)([H])/C=C(C)/CCCC(O)C(NC4=CC=CC=C4C(N[C@H](C)C(N/C=C/C5=CNC6=C5C=CC=C6)=O)=O)CC3=O	Aspochalamins C	weak to mild cytotoxic effect against HMO2, MCF7, HepG2 and Huh9	Weak antibacterial effect against the examined against Gram-positive bacteria					Aspergillus	Aspergillus		CC(C[C@@H]1NC(=O)[C@@]23[C@H]1[C@H](C)C(=C[C@@H]3/C=C(\C)/CCC(C(C(CC2=O)Nc1ccccc1C(=O)N[C@@H](C(=O)N/C=C/c1c[nH]c2c1cccc2)C)O)O)C)C	C44H55N5O6	749.94	55	15	0.45	11	6	7	220.09	172.65	3.80	5.58	4.95	2.10	5.10	4.31	-7.48	2.48e-05	3.30e-08	Poorly soluble	-8.97	8.09e-07	1.08e-09	Poorly soluble	-9.53	2.23e-07	2.97e-10	Poorly soluble	Low	No	Yes	No	No	No	No	Yes	-6.91
60	O=C1N[C@@H](CC(C)C)[C@]2([H])[C@H](C)C(C)=C[C@]([C@@]321)([H])/C=C(C)/CCCCC(NC4=CC=CC=C4C(N[C@H](C)C(N/C=C/C5=CNC6=C5C=CC=C6)=O)=O)CC3=O	Aspochalamins D	weak to mild cytotoxic effect against HMO2, MCF7, HepG2 and Huh10	Weak antibacterial effect against the examined against Gram-positive bacteria					Aspergillus	Aspergillus		CC(C[C@@H]1NC(=O)[C@@]23[C@H]1[C@H](C)C(=C[C@@H]3/C=C(\C)/CCCCC(CC2=O)Nc1ccccc1C(=O)N[C@@H](C(=O)N/C=C/c1c[nH]c2c1cccc2)C)C)C	C44H55N5O4	717.94	53	15	0.45	11	4	5	217.76	132.19	4.69	7.71	7.01	3.63	6.86	5.98	-8.63	1.68e-06	2.33e-09	Poorly soluble	-10.33	3.37e-08	4.70e-11	Insoluble	-11.19	4.68e-09	6.52e-12	Insoluble	Low	No	Yes	No	No	No	No	Yes	-5.21
61	O=C1N[C@@H](CC(C)C)[C@]2([H])[C@H](C)C(C)=C[C@]([C@@]321)([H])/C=C(C)/CC[C@@H](O)[C@@H](O)/C=C/C3=O	Aspochalasins D	Cytotoxicity with EC50 value of 5.72 μM against Hela; mild to potent cytoxicity against MOLT4, A549, HL-60 and BEL-7402 from 2.3 to 16.3						Aspergillus	Aspergillus		CC(C[C@@H]1NC(=O)[C@@]23[C@H]1[C@H](C)C(=C[C@@H]3/C=C(\C)/CC[C@H]([C@H](/C=C/C2=O)O)O)C)C	C24H35NO4	401.54	29	0	0.67	2	4	3	118.90	86.63	3.44	2.51	2.55	2.26	2.45	2.64	-3.78	6.68e-02	1.66e-04	Soluble	-3.98	4.25e-02	1.06e-04	Soluble	-3.23	2.36e-01	5.87e-04	Soluble	High	No	Yes	No	No	No	No	Yes	-6.97
62	O=C1N[C@@H](CC(C)C)[C@]2([H])[C@H](C)C(C)=C[C@]([C@@]321)([H])/C=C(C)/CCCC/C=C/C3=O	Aspochalasins Z	Weak to mild cytotoxic effect against HMO2, MCF7, HepG2 and Huh10						Aspergillus	Aspergillus		CC(C[C@@H]1NC(=O)[C@@]23[C@H]1[C@H](C)C(=C[C@@H]3/C=C(\C)/CCCC/C=C/C2=O)C)C	C24H35NO2	369.54	27	0	0.67	2	2	1	116.57	46.17	3.63	4.97	4.61	3.94	4.24	4.28	-5.13	2.74e-03	7.41e-06	Moderately soluble	-5.68	7.75e-04	2.10e-06	Moderately soluble	-4.87	5.01e-03	1.36e-05	Moderately soluble	High	Yes	No	No	Yes	Yes	No	Yes	-5.03
63	O=C1N[C@@H](CC(C)C)[C@]2([H])C(C)=C(C)[C@@H](O)[C@@]3([H])[C@@]21C(C[C@@H](O)[C@H](O)CCC/C(C)=C/3)=O	Aspochalasin U	Mild effect against the necrotic cell death induced by TNF-α						Aspergillus	Aspergillus		CC(C[C@@H]1NC(=O)[C@@]23[C@H]1C(=C(C)[C@H]([C@@H]3/C=C(\C)/CCC[C@H]([C@@H](CC2=O)O)O)O)C)C	C24H37NO5	419.55	30	0	0.75	2	5	4	120.53	106.86	2.56	0.81	1.89	1.54	2.36	1.83	-2.82	6.36e-01	1.52e-03	Soluble	-2.64	9.70e-01	2.31e-03	Soluble	-3.33	1.97e-01	4.70e-04	Soluble	High	No	Yes	No	No	No	No	No	-8.28
65	O=C1N[C@@H](CC(C)C)[C@]2([H])[C@H](C)C(C)=C[C@]([C@@]321)([H])/C=C(C)/CC[C@@H](O)C([C@@]4([H])[C@]([C@@H]5O[C@H]4C6=C5C(O)=C(OC)C(O)=C6C)([H])C3=O)=O	Asperchalasine B	Cytotoxic						Aspergillus	Aspergillus		COc1c(O)c2[C@H]3O[C@@H](c2c(c1O)C)[C@@H]1[C@@H]3C(=O)[C@]23C(=O)N[C@H]([C@@H]3[C@@H](C(=C[C@@H]2/C=C(/CC[C@H](C1=O)O)\C)C)C)CC(C)C	C34H43NO8	593.71	43	6	0.62	3	8	4	165.03	142.39	3.50	2.97	3.34	1.59	3.75	3.03	-5.30	2.99e-03	5.04e-06	Moderately soluble	-5.62	1.41e-03	2.38e-06	Moderately soluble	-5.42	2.24e-03	3.77e-06	Moderately soluble	Low	No	Yes	No	No	No	No	No	-7.81
66	O=C1N[C@@H](CC(C)C)[C@]2([H])[C@H](C)C(C)=C[C@]([C@@]321)([H])/C=C(C)/CC[C@@H](O)C([C@@]4([H])[C@]([C@@H]5O[C@H]4C6=C5C(C)=C(O)C(OC)=C6C)([H])C3=O)=O	Asperchalasine C	Cytotoxic						Aspergillus	Aspergillus		COc1c(O)c(C)c2c(c1C)[C@@H]1O[C@H]2[C@@H]2[C@@H]1C(=O)[C@H](O)CC/C(=C/[C@@H]1[C@]3(C2=O)C(=O)N[C@H]([C@@H]3[C@@H](C(=C1)C)C)CC(C)C)/C	C35H45NO7	591.73	43	6	0.63	3	7	3	167.97	122.16	3.76	3.69	3.94	2.29	4.77	3.69	-5.74	1.08e-03	1.83e-06	Moderately soluble	-5.95	6.71e-04	1.13e-06	Moderately soluble	-6.39	2.42e-04	4.08e-07	Poorly soluble	High	No	Yes	No	No	No	No	Yes	-7.29
67	O=C1N[C@@H](CC(C)C)[C@]2([H])[C@H](C)C(C)=C[C@]([C@@]321)([H])/C=C(C)/CC[C@@H](O)C([C@@]4([H])[C@]([C@H]5O[C@@H]4C6=C5C(C)=C(O)C(OC)=C6C)([H])C3=O)=O	Asperchalasine D	Cytotoxic						Aspergillus	Aspergillus		COc1c(O)c(C)c2c(c1C)[C@H]1O[C@@H]2[C@@H]2[C@@H]1C(=O)[C@H](O)CC/C(=C/[C@@H]1[C@]3(C2=O)C(=O)N[C@H]([C@@H]3[C@@H](C(=C1)C)C)CC(C)C)/C	C35H45NO7	591.73	43	6	0.63	3	7	3	167.97	122.16	3.97	3.69	3.94	2.29	4.77	3.73	-5.74	1.08e-03	1.83e-06	Moderately soluble	-5.95	6.71e-04	1.13e-06	Moderately soluble	-6.39	2.42e-04	4.08e-07	Poorly soluble	High	No	Yes	No	No	No	No	Yes	-7.29
68	O=C(C/C=C1\C)OC23C(C(O4)C4(C)C(C)C2C(CC5=CC=CC=C5)NC3=O)/C=C/CC(C)C1=O	Rosellichalasin							Aspergillus	Aspergillus		O=C1C/C=C(\C)/C(=O)C(C)C/C=C/C2C3(O1)C(=O)NC(C3C(C)C1(C2O1)C)Cc1ccccc1	C28H33NO5	463.57	34	6	0.54	2	5	1	132.51	85.00	3.69	3.95	3.17	2.83	3.92	3.51	-5.20	2.92e-03	6.29e-06	Moderately soluble	-5.44	1.70e-03	3.67e-06	Moderately soluble	-6.00	4.60e-04	9.93e-07	Poorly soluble	High	No	Yes	No	No	No	No	Yes	-6.32
69	O=C1NC(CC(C)C)C2C(C)C(C)=CC(C321)/C=C(C)/CC(O)C(O)C(O)CCC3=O	Aspochalasin E							Aspergillus	Aspergillus		CC(CC1NC(=O)C23C1C(C)C(=CC3/C=C(\C)/CC(C(C(CCC2=O)O)O)O)C)C	C24H37NO5	419.55	30	0	0.75	2	5	4	120.53	106.86	3.05	1.53	1.75	1.54	1.97	1.97	-3.27	2.24e-01	5.33e-04	Soluble	-3.38	1.74e-01	4.14e-04	Soluble	-2.88	5.56e-01	1.32e-03	Soluble	High	No	Yes	No	No	No	No	Yes	-7.77
70	O=C1NC(CC(C)C)C2C(C)C(C)=CC(C21C(CCC3O)=O)/C=C(C)/CCC3=O	Aspochalasin M	No cytotoxicity with EC50 values of > 40 μM against Hela						Aspergillus	Aspergillus		CC(CC1NC(=O)C23C1C(C)C(=CC3/C=C(\C)/CCC(=O)C(CCC2=O)O)C)C	C24H35NO4	401.54	29	0	0.71	2	4	2	118.41	83.47	3.27	2.51	2.98	2.26	3.45	2.90	-3.78	6.68e-02	1.66e-04	Soluble	-3.91	4.95e-02	1.23e-04	Soluble	-4.39	1.62e-02	4.04e-05	Moderately soluble	High	No	Yes	No	No	No	No	Yes	-6.97
71	O=C1NC(CC(C)C)C2C(C)C(C)=CC(C321)/C=C(C)/CCC(O)C(CCC3=O)=O	Aspochalasin P	No cytotoxicity with EC50 values of > 40 μM against Hela; moderate cytotoxicity against HL-60 of 20.0						Aspergillus	Aspergillus		CC(CC1NC(=O)C23C1C(C)C(=CC3/C=C(\C)/CCC(C(=O)CCC2=O)O)C)C	C24H35NO4	401.54	29	0	0.71	2	4	2	118.41	83.47	3.70	2.51	2.98	2.26	3.45	2.98	-3.78	6.68e-02	1.66e-04	Soluble	-3.91	4.95e-02	1.23e-04	Soluble	-4.39	1.62e-02	4.04e-05	Moderately soluble	High	No	Yes	No	No	No	No	Yes	-6.97
72	O=C1NC(CC(C)C)C2C(C)C(C)=CC(C321)/C=C(C)/CCC(O)C(O)CCC3=O	19,20-Dihydro-aspochalasin D							Aspergillus	Aspergillus		CC(CC1NC(=O)C23C1C(C)C(=CC3/C=C(\C)/CCC(C(CCC2=O)O)O)C)C	C24H37NO4	403.55	29	0	0.75	2	4	3	119.37	86.63	3.26	2.50	2.78	2.35	2.86	2.75	-3.79	6.62e-02	1.64e-04	Soluble	-3.96	4.38e-02	1.08e-04	Soluble	-3.70	8.09e-02	2.00e-04	Soluble	High	No	Yes	No	No	No	No	Yes	-6.99
73	O=C1NC(CC(C)C)C2C(C)C(C)=CC(C321)/C=C(C)/CCC(O)C(O)C4C(O4)C3=O	Aspochalasin H							Aspergillus	Aspergillus		CC(CC1NC(=O)C23C1C(C)C(=CC2/C=C(\C)/CCC(C(C1C(C3=O)O1)O)O)C)C	C24H35NO5	417.54	30	0	0.75	2	5	3	118.34	99.16	3.19	1.97	1.76	1.54	2.30	2.15	-3.54	1.21e-01	2.90e-04	Soluble	-3.68	8.77e-02	2.10e-04	Soluble	-2.96	4.60e-01	1.10e-03	Soluble	High	No	Yes	No	No	No	No	No	-7.45
77	O=C1N[C@@H](CC(C)C)[C@]2([H])[C@H](C)C(C)=C[C@]([C@@]321)([H])/C=C(C)/CC[C@@H](O)[C@@H](O)/C=C/C3=O								Aspergillus	Aspergillus		CC(C[C@@H]1NC(=O)[C@@]23[C@H]1[C@H](C)C(=C[C@@H]3/C=C(\C)/CC[C@H]([C@H](/C=C/C2=O)O)O)C)C	C24H35NO4	401.54	29	0	0.67	2	4	3	118.90	86.63	3.44	2.51	2.55	2.26	2.45	2.64	-3.78	6.68e-02	1.66e-04	Soluble	-3.98	4.25e-02	1.06e-04	Soluble	-3.23	2.36e-01	5.87e-04	Soluble	High	No	Yes	No	No	No	No	Yes	-6.97
78	O=C1N[C@@H](CC(C)C)[C@]2([H])[C@H](C)C(C)=C[C@]([C@@]321)([H])/C=C(C)/CCCC(O)/C=C/C3=O								Aspergillus	Aspergillus		CC(C[C@@H]1NC(=O)[C@@]23[C@H]1[C@H](C)C(=C[C@@H]3/C=C(\C)/CCCC(/C=C/C2=O)O)C)C	C24H35NO3	385.54	28	0	0.67	2	3	2	117.74	66.40	3.58	3.49	3.58	3.09	3.34	3.42	-4.30	1.95e-02	5.05e-05	Moderately soluble	-4.57	1.04e-02	2.71e-05	Moderately soluble	-4.05	3.44e-02	8.91e-05	Moderately soluble	High	Yes	Yes	No	No	No	No	Yes	-6.17
79	O=C1N[C@@H](CC(C)C)[C@]2([H])[C@H](C)C(C)=C[C@]([C@@]321)([H])/C=C(C)/CC[C@@H](O)[C@@H](O)[C@H](OC)CC3=O								Aspergillus	Aspergillus		CO[C@@H]1CC(=O)[C@]23C(=O)N[C@H]([C@@H]3[C@@H](C(=C[C@@H]2/C=C(/CC[C@H]([C@H]1O)O)\C)C)C)CC(C)C	C25H39NO5	433.58	31	0	0.76	3	5	3	125.26	95.86	3.61	2.07	2.40	1.74	2.52	2.47	-3.63	1.01e-01	2.32e-04	Soluble	-3.71	8.41e-02	1.94e-04	Soluble	-3.57	1.18e-01	2.71e-04	Soluble	High	No	Yes	No	No	No	No	Yes	-7.48
80	O=C1N[C@@H](CC(C)C)[C@]2([H])[C@H](C)C(C)=C[C@]([C@@]321)([H])/C=C(C)/CC[C@@H](O)[C@@H](O)CCC3=O	Flavichalasine G							Aspergillus	Aspergillus		CC(C[C@@H]1NC(=O)[C@@]23[C@H]1[C@H](C)C(=C[C@@H]3/C=C(\C)/CC[C@H]([C@H](CCC2=O)O)O)C)C	C24H37NO4	403.55	29	0	0.75	2	4	3	119.37	86.63	3.26	2.50	2.78	2.35	2.86	2.75	-3.79	6.62e-02	1.64e-04	Soluble	-3.96	4.38e-02	1.08e-04	Soluble	-3.70	8.09e-02	2.00e-04	Soluble	High	No	Yes	No	No	No	No	Yes	-6.99
81	O=C1N[C@@H](CC(C)C)[C@]2([H])[C@H](C)C(C)=C[C@]([C@@]321)([H])[C@@]4([H])[C@@](C)(O5)CC[C@@H](O)[C@@H]5[C@@]4([H])CC3=O	Aspergillin PZ							Aspergillus	Aspergillus		CC(C[C@@H]1NC(=O)[C@@]23[C@H]1[C@H](C)C(=C[C@@H]3[C@@H]1[C@H](CC2=O)[C@@H]2O[C@@]1(C)CC[C@H]2O)C)C	C24H35NO4	401.54	29	0	0.83	2	4	2	115.58	75.63	3.19	2.35	2.48	2.44	2.94	2.68	-3.68	8.43e-02	2.10e-04	Soluble	-3.58	1.06e-01	2.64e-04	Soluble	-3.78	6.71e-02	1.67e-04	Soluble	High	Yes	Yes	No	No	No	No	No	-7.08
82	C[C@H]1[C@@H]([C@H](CC(C)C)NC2=O)[C@]2(C(/C=C/C3=O)=O)[C@@H](/C=C(C)/CC[C@H]3O)C=C1C	Aspochalasin B	Cytotoxicity against MOLT4, A549, HL60 of 13.0, 19.6, 11.6, respectively						Spicaria	Other		CC(C[C@@H]1NC(=O)[C@@]23[C@H]1[C@H](C)C(=C[C@@H]3/C=C(\C)/CC[C@H](C(=O)/C=C/C2=O)O)C)C	C24H33NO4	399.52	29	0	0.62	2	4	2	117.94	83.47	3.19	2.85	2.76	2.18	3.04	2.80	-3.98	4.18e-02	1.05e-04	Soluble	-4.26	2.19e-02	5.48e-05	Moderately soluble	-3.93	4.73e-02	1.18e-04	Soluble	High	No	Yes	No	No	No	No	Yes	-6.71
83	CC1=C[C@@](/C=C(C)/CC[C@@H](O2)[C@@H](OC3=O)[C@H](C[C@]2(C(CCC/C(C)=C/[C@](C=C(C)[C@@]4([H])C)([H])[C@@]35[C@]4([H])[C@@H](NC5=O)CC(C)C)=O)O)CC6=O)([H])[C@@]6(C([C@@H]1C)[C@H](CC(C)C)N7)C7=O	Bisaspochalasin A							Aspergillus	Aspergillus		CC(C[C@@H]1NC(=O)[C@@]23C1[C@H](C)C(=C[C@@H]3/C=C(\C)/CC[C@@H]1[C@@H]3[C@@H](CC2=O)C[C@](O)(O1)C(=O)CCC/C(=C/[C@@H]1[C@@]2(C(=O)O3)C(=O)N[C@H]([C@@H]2[C@@H](C(=C1)C)C)CC(C)C)/C)C)C	C48H68N2O8	801.06	58	0	0.73	4	8	3	233.44	148.10	4.13	6.10	6.35	3.94	6.09	5.32	-8.39	3.30e-06	4.12e-09	Poorly soluble	-8.99	8.17e-07	1.02e-09	Poorly soluble	-8.38	3.32e-06	4.14e-09	Poorly soluble	Low	No	Yes	No	No	No	No	No	-6.86
84	C[C@H]1[C@@H]([C@H](CC(C)C)NC2=O)[C@]23[C@](/C=C(C)/CC[C@@H](O)C(C[C@](S[C@](C4=O)([H])CC([C@H](O)CC/C(C)=C/[C@]5([H])[C@@]64[C@H]([C@H](CC(C)C)NC6=O)[C@H](C)C(C)=C5)=O)([H])C3=O)=O)([H])C=C1C	Bisaspochalasin B							Aspergillus	Aspergillus		CC(C[C@@H]1NC(=O)[C@]23[C@H]1[C@H](C)C(=C[C@@H]2/C=C(\C)/CC[C@H](C(=O)C[C@H](C3=O)S[C@@H]1CC(=O)[C@H](O)CC/C(=C/[C@@H]2[C@]3(C1=O)C(=O)N[C@H]([C@@H]3[C@@H](C(=C2)C)C)CC(C)C)/C)O)C)C	C48H68N2O8S	833.13	59	0	0.71	6	8	4	242.30	192.24	6.27	5.71	5.67	2.65	6.12	5.29	-8.21	5.18e-06	6.21e-09	Poorly soluble	-9.51	2.55e-07	3.07e-10	Poorly soluble	-8.06	7.22e-06	8.67e-09	Poorly soluble	Low	No	Yes	No	No	No	No	No	-7.33
85	CC1=C(C)[C@@H](OO)[C@@](/C=C(C)/CC[C@@H](O)C(C[C@](S[C@](C2=O)([H])CC([C@H](O)CC/C(C)=C/[C@]3([H])[C@@]42[C@H]([C@H](CC(C)C)NC4=O)[C@H](C)C(C)=C3)=O)([H])C5=O)=O)([H])[C@@]65[C@@H]1[C@H](CC(C)C)NC6=O	Bisaspochalasin C							Aspergillus	Aspergillus		OO[C@@H]1C(=C(C)[C@@H]2[C@]3([C@H]1/C=C(\C)/CC[C@H](C(=O)C[C@H](C3=O)S[C@@H]1CC(=O)[C@H](O)CC/C(=C/[C@@H]3[C@]4(C1=O)C(=O)N[C@H]([C@@H]4[C@@H](C(=C3)C)C)CC(C)C)/C)O)C(=O)N[C@H]2CC(C)C)C	C48H68N2O10S	865.13	61	0	0.71	7	10	5	244.95	221.70	5.07	4.06	5.28	1.94	5.19	4.31	-7.30	4.34e-05	5.02e-08	Poorly soluble	-8.42	3.29e-06	3.80e-09	Poorly soluble	-7.39	3.50e-05	4.05e-08	Poorly soluble	Low	No	Yes	No	No	No	No	No	-8.69
86	CC1=C(C)[C@]([C@H](C2=CC=CC=C2)C(N(C)C3=O)=O)([H])[C@]3(C(CC([C@@H](C)C[C@@H](C)C/C(C)=C/4)=O)=O)[C@]4([H])[C@@H]1O	Asporychalasin	Mild antiproliferative properties against A549, HepG2, and MCF7 8.8, 7.4, and 8.3, respectively						Aspergillus	Aspergillus	Unprecedented 6/6/11 skeleton	C[C@H]1C/C(=C/[C@H]2[C@H](O)C(=C([C@@H]3[C@@]2(C(=O)CC(=O)[C@H](C1)C)C(=O)N(C)C(=O)[C@H]3c1ccccc1)C)C)/C	C30H37NO5	491.62	36	6	0.53	1	5	1	143.19	91.75	3.79	2.84	3.86	2.74	4.01	3.45	-4.73	9.06e-03	1.84e-05	Moderately soluble	-4.43	1.85e-02	3.76e-05	Moderately soluble	-6.20	3.13e-04	6.37e-07	Poorly soluble	High	No	Yes	No	No	No	No	Yes	-7.28
87	CC(C)C[C@H](NC1=O)[C@]2([H])[C@H](C)C(C)=C[C@@]3([H])C21C(/C([C@@]34[H])=C/C[C@@H](O)CCC4=C)=O	Aspermichalasines A							Aspergillus	Aspergillus	First example of cytochalasan monomer possess a 5/6/5/8 skeleton	CC(C[C@@H]1NC(=O)C23[C@H]1[C@H](C)C(=C[C@@H]3[C@@H]1C(=CC[C@H](CCC1=C)O)C2=O)C)C	C24H33NO3	383.52	28	0	0.67	2	3	2	115.62	66.40	3.39	3.15	3.19	3.09	3.62	3.29	-4.07	3.26e-02	8.50e-05	Moderately soluble	-4.21	2.34e-02	6.10e-05	Moderately soluble	-4.28	2.01e-02	5.24e-05	Moderately soluble	High	Yes	Yes	No	No	Yes	No	Yes	-6.40
88	CC(C)C[C@H](NC1=O)[C@]2([H])[C@H](C)C(C)=C[C@@]3([H])C21C(C[C@@H](OCC)[C@H](O)[C@H](O)CC/C(C)=C/3)=O	Aspermichalasines B	Potent cytotoxic effect against the HL60 from 5.67 to 18.75; strong cytotoxicity against Hep3B 7.99						Aspergillus	Aspergillus		CCO[C@@H]1CC(=O)C23C(=O)N[C@H]([C@@H]3[C@@H](C(=C[C@@H]2/C=C(/CC[C@H]([C@H]1O)O)\C)C)C)CC(C)C	C26H41NO5	447.61	32	0	0.77	4	5	3	130.07	95.86	3.90	2.43	2.79	1.95	2.93	2.80	-3.88	5.87e-02	1.31e-04	Soluble	-4.09	3.67e-02	8.21e-05	Moderately soluble	-3.96	4.93e-02	1.10e-04	Soluble	High	No	Yes	No	No	No	No	Yes	-7.31
89	CC(C)C[C@H](NC1=O)[C@]2([H])[C@H](C)C(C)=C[C@@]3([H])C21C(C[C@@H](OC)[C@H](O)[C@@H](O)CC/C(C)=C/3)=O	Aspermichalasines C	Potent cytotoxic effect against the HL60 from 5.67 to 18.76						Aspergillus	Aspergillus		CO[C@@H]1CC(=O)C23C(=O)N[C@H]([C@@H]3[C@@H](C(=C[C@@H]2/C=C(/CC[C@@H]([C@H]1O)O)\C)C)C)CC(C)C	C25H39NO5	433.58	31	0	0.76	3	5	3	125.26	95.86	3.62	2.07	2.40	1.74	2.52	2.47	-3.63	1.01e-01	2.32e-04	Soluble	-3.71	8.41e-02	1.94e-04	Soluble	-3.57	1.18e-01	2.71e-04	Soluble	High	No	Yes	No	No	No	No	Yes	-7.48
90	CC(C)C[C@H](NC1=O)[C@]2([H])[C@H](C)C(C)=C[C@@]3([H])C21C(C[C@@H](OC)[C@H](O)CCC/C(C)=C/3)=O	Aspermichalasines D	Potent cytotoxic effect against the HL60 from 5.67 to 18.77						Aspergillus	Aspergillus		CO[C@@H]1CC(=O)C23C(=O)N[C@H]([C@@H]3[C@@H](C(=C[C@@H]2/C=C(/CCC[C@H]1O)\C)C)C)CC(C)C	C25H39NO4	417.58	30	0	0.76	3	4	2	124.10	75.63	3.76	3.04	3.43	2.56	3.41	3.24	-4.15	2.98e-02	7.14e-05	Moderately soluble	-4.29	2.12e-02	5.08e-05	Moderately soluble	-4.39	1.71e-02	4.09e-05	Moderately soluble	High	Yes	Yes	No	No	No	No	Yes	-6.69
91	CC(C)C[C@H](NC1=O)[C@]2([H])[C@H](C)C(C)=C[C@@]3([H])C21C(C[C@@H](O)[C@H](O)CCC/C(C)=C/3)=O	Aspermichalasines E							Aspergillus	Aspergillus		CC(C[C@@H]1NC(=O)C23[C@H]1[C@H](C)C(=C[C@@H]3/C=C(\C)/CCC[C@H]([C@@H](CC2=O)O)O)C)C	C24H37NO4	403.55	29	0	0.75	2	4	3	119.37	86.63	3.34	2.50	2.78	2.35	2.86	2.76	-3.79	6.62e-02	1.64e-04	Soluble	-3.96	4.38e-02	1.08e-04	Soluble	-3.70	8.09e-02	2.00e-04	Soluble	High	No	Yes	No	No	No	No	Yes	-6.99
95	O=C(/C=C/CCCC[C@@H](CO)C/C=C/1)O[C@]2([C@@H]1[C@@H]3O)[C@@]([C@H](CC4=CC=CC=C4)NC2=O)([H])[C@H](C)C3=C	Aspergicytochalasins A				Inhibition effect towards the NO production 26.8			Aspergillus	Aspergillus		OC[C@@H]1CCCC/C=C/C(=O)O[C@@]23[C@@H](/C=C/C1)[C@H](O)C(=C)[C@H]([C@H]3[C@@H](NC2=O)Cc1ccccc1)C	C29H37NO5	479.61	35	6	0.52	3	5	3	139.96	95.86	3.50	3.45	3.11	3.03	3.13	3.25	-4.92	5.82e-03	1.21e-05	Moderately soluble	-5.14	3.44e-03	7.17e-06	Moderately soluble	-5.19	3.07e-03	6.40e-06	Moderately soluble	High	No	Yes	No	No	No	No	Yes	-6.78
96	O=C(/C=C/[C@H](O)CCC[C@@H](CO)C/C=C/1)O[C@]2([C@@H]1[C@@H]3O)[C@@]([C@H](CC4=CC=CC=C4)NC2=O)([H])[C@H](C)C3=C	Aspergicytochalasins B				No inhibition effect towards the NO production			Aspergillus	Aspergillus		OC[C@@H]1CCC[C@@H](O)/C=C/C(=O)O[C@@]23[C@@H](/C=C/C1)[C@H](O)C(=C)[C@H]([C@H]3[C@@H](NC2=O)Cc1ccccc1)C	C29H37NO6	495.61	36	6	0.52	3	6	4	141.12	116.09	3.35	1.96	2.08	2.23	2.24	2.37	-4.07	4.19e-02	8.45e-05	Moderately soluble	-4.02	4.70e-02	9.48e-05	Moderately soluble	-4.37	2.11e-02	4.26e-05	Moderately soluble	High	No	Yes	No	No	No	No	Yes	-7.93
97	O=C(/C=C/[C@H](O)CCC[C@@H](C)C1=O)O[C@]2([C@@H](/C=C/1)[C@@H]3O)[C@@]([C@H](CC4=CC=CC=C4)NC2=O)([H])[C@H](C)C3=C	Aspergicytochalasins C		Antibacterial activity against S. aureus subsp. aureus ATCC29213 128		Inhibition effect towards the NO production 17.1			Aspergillus	Aspergillus		O[C@@H]1CCC[C@@H](C)C(=O)/C=C/[C@@H]2[C@]3(OC(=O)/C=C/1)C(=O)N[C@H]([C@@H]3[C@@H](C(=C)[C@H]2O)C)Cc1ccccc1	C29H35NO6	493.59	36	6	0.48	2	6	3	140.16	112.93	3.20	2.12	2.29	2.15	2.54	2.46	-4.23	2.93e-02	5.93e-05	Moderately soluble	-4.12	3.72e-02	7.54e-05	Moderately soluble	-4.82	7.49e-03	1.52e-05	Moderately soluble	High	No	Yes	No	No	No	No	Yes	-7.81
98	O=C(/C=C/[C@H](O)CCC[C@@H](C)C/C=C/1)O[C@]2([C@@H]1[C@@H]3O)[C@@]([C@H](CC4=CC=CC=C4)NC2=O)([H])[C@](O)(C)C3=C	Aspergicytochalasins D		Antibacterial activity against S. aureus subsp. aureus ATCC29213 64		No inhibition effect towards the NO production			Aspergillus	Aspergillus		C[C@@H]1CCC[C@@H](O)/C=C/C(=O)O[C@@]23[C@@H](/C=C/C1)[C@H](O)C(=C)[C@]([C@H]3[C@@H](NC2=O)Cc1ccccc1)(C)O	C29H37NO6	495.61	36	6	0.52	2	6	4	141.16	116.09	3.23	2.12	2.23	2.23	2.35	2.43	-4.24	2.85e-02	5.76e-05	Moderately soluble	-4.19	3.21e-02	6.47e-05	Moderately soluble	-4.57	1.33e-02	2.68e-05	Moderately soluble	High	No	Yes	No	No	No	No	Yes	-7.82
99	O=C(/C=C/[C@H](O)CCC[C@@H](C)C/C=C/1)O[C@]2([C@@H]1[C@@H]3O)[C@@]([C@H](CC4=CC=CC(O)=C4)NC2=O)([H])[C@H](C)C3=C	Aspergicytochalasins E				Inhibition effect towards the NO production 31.2			Aspergillus	Aspergillus		C[C@@H]1CCC[C@@H](O)/C=C/C(=O)O[C@@]23[C@@H](/C=C/C1)[C@H](O)C(=C)[C@H]([C@H]3[C@@H](NC2=O)Cc1cccc(c1)O)C	C29H37NO6	495.61	36	6	0.52	2	6	4	141.98	116.09	3.37	3.01	2.82	2.50	2.37	2.81	-4.80	7.85e-03	1.58e-05	Moderately soluble	-5.11	3.82e-03	7.72e-06	Moderately soluble	-4.35	2.20e-02	4.44e-05	Moderately soluble	High	No	Yes	No	No	No	No	Yes	-7.19
100	O=C1O[C@@]23[C@@]([C@H](CC4=CC=CC=C4)NC3=O)([H])[C@H](C)[C@@](O)(C)[C@@H](O)[C@@H]2/C=C/C[C@H](C)CCC[C@@H](O)/C=C/1	Aspergicytochalasins F				Inhibition effect towards the NO production 12.7			Aspergillus	Aspergillus		C[C@@H]1CCC[C@@H](O)/C=C/C(=O)O[C@@]23[C@@H](/C=C/C1)[C@H](O)[C@@](C)(O)[C@H]([C@H]3[C@@H](NC2=O)Cc1ccccc1)C	C29H39NO6	497.62	36	6	0.59	2	6	4	141.64	116.09	3.64	3.56	2.31	2.31	2.08	2.78	-5.16	3.45e-03	6.93e-06	Moderately soluble	-5.68	1.03e-03	2.07e-06	Moderately soluble	-4.34	2.27e-02	4.57e-05	Moderately soluble	High	No	Yes	No	No	No	No	Yes	-6.81
101	O=C1/C(C)=C/[C@@H](C)C/C=C/[C@@H]2[C@@]3(C4=N[C@@]1([H])CC4)[C@]([H])([C@H](CC5=CNC6=C5C=CC=C6)NC3=O)[C@H](C)[C@]7(C)[C@H]2O7	Penochalasins D	Potent cytotoxic effect towards P388 cancer ED50 3.2						Penicillium	Other		C[C@H]1C/C=C/[C@H]2[C@@H]3O[C@]3(C)[C@H]([C@@H]3[C@]2(C(=O)N[C@H]3Cc2c[nH]c3c2cccc3)C2=N[C@H](C(=O)/C(=C/1)/C)CC2)C	C32H37N3O3	511.65	38	9	0.53	2	4	2	157.30	86.85	3.07	4.49	4.19	2.91	5.56	4.04	-5.88	6.68e-04	1.31e-06	Moderately soluble	-6.03	4.73e-04	9.24e-07	Poorly soluble	-7.56	1.41e-05	2.75e-08	Poorly soluble	High	No	Yes	No	No	Yes	No	No	-6.23
102	C[C@]12[C@@H](O2)[C@H](/C=C/C[C@H](C)/C=C(C)/[C@H](O)C(CC3)=O)[C@@]4(C3=O)[C@]([H])([C@H](CC5=CNC6=C5C=CC=C6)NC4=O)[C@@H]1C	Penochalasins E	Potent cytotoxic effect towards P388 cancer ED50 2.1						Penicillium	Other		C[C@H]1C/C=C/[C@H]2[C@@H]3O[C@]3(C)[C@H]([C@@H]3[C@]2(C(=O)N[C@H]3Cc2c[nH]c3c2cccc3)C(=O)CCC(=O)[C@H](/C(=C/1)/C)O)C	C32H38N2O5	530.65	39	9	0.53	2	5	3	153.76	111.79	3.48	3.37	3.68	2.11	4.44	3.41	-5.29	2.71e-03	5.11e-06	Moderately soluble	-5.40	2.13e-03	4.02e-06	Moderately soluble	-6.83	7.92e-05	1.49e-07	Poorly soluble	High	No	Yes	No	No	No	No	Yes	-7.14
103	C[C@]12[C@@H](O2)[C@H](/C=C/C[C@H](C)/C=C(C)/[C@@H](O)C(CC3)=O)[C@@]4(C3=O)[C@]([H])([C@H](CC5=CNC6=C5C=CC=C6)NC4=O)[C@@H]1C	Penochalasins F	Potent cytotoxic effect towards P388 cancer ED50 1.8						Penicillium	Other		C[C@H]1C/C=C/[C@H]2[C@@H]3O[C@]3(C)[C@H]([C@@H]3[C@]2(C(=O)N[C@H]3Cc2c[nH]c3c2cccc3)C(=O)CCC(=O)[C@@H](/C(=C/1)/C)O)C	C32H38N2O5	530.65	39	9	0.53	2	5	3	153.76	111.79	3.12	3.37	3.68	2.11	4.44	3.34	-5.29	2.71e-03	5.11e-06	Moderately soluble	-5.40	2.13e-03	4.02e-06	Moderately soluble	-6.83	7.92e-05	1.49e-07	Poorly soluble	High	No	Yes	No	No	No	No	Yes	-7.14
104	C[C@H]1[C@@]([H])([C@H](CC2=CNC3=C2C=CC=C3)NC4=O)[C@]4(C5=O)[C@@H](/C=C/C[C@H](C)/C=C(C)/[C@@H](O)C(CC5)=O)C=C1C	Penochalasins G	Potent cytotoxic effect towards P388 cancer ED50 1.9; no cytotoxic against U937, H1975, K562, MOLT-4, BGC823, MCF-7, Hela, A549, Huh-7, HL60	No anti-tuberculosis activity					Penicillium	Other		C[C@H]1C/C=C/[C@H]2C=C(C)[C@H]([C@@H]3[C@]2(C(=O)N[C@H]3Cc2c[nH]c3c2cccc3)C(=O)CCC(=O)[C@@H](/C(=C/1)/C)O)C	C32H38N2O4	514.66	38	9	0.47	2	4	3	154.28	99.26	3.32	3.96	4.46	2.83	4.60	3.84	-5.57	1.39e-03	2.70e-06	Moderately soluble	-5.74	9.26e-04	1.80e-06	Moderately soluble	-7.10	4.05e-05	7.87e-08	Poorly soluble	High	No	Yes	No	No	No	No	Yes	-6.63
105	CC1=C(C)[C@@H](O)[C@H](/C=C/C[C@H](C)/C=C(C)/[C@H](O)C(CC2)=O)[C@@]3(C2=O)[C@@]1([C@H](CC4=CNC5=C4C=CC=C5)NC3=O)[H]	Penochalasins H	Potent cytotoxic effect towards P388 cancer ED50 2.8						Penicillium	Other		C[C@H]1C/C=C/[C@H]2[C@H](O)C(=C([C@@H]3[C@]2(C(=O)N[C@H]3Cc2c[nH]c3c2cccc3)C(=O)CCC(=O)[C@H](/C(=C/1)/C)O)C)C	C32H38N2O5	530.65	39	9	0.47	2	5	4	155.44	119.49	3.11	2.27	3.58	2.03	4.10	3.02	-4.60	1.34e-02	2.52e-05	Moderately soluble	-4.42	2.04e-02	3.84e-05	Moderately soluble	-6.73	9.88e-05	1.86e-07	Poorly soluble	High	No	Yes	No	No	No	No	Yes	-7.93
106	CC1=C(C)[C@@H](O)[C@H](/C=C/C[C@H](C)/C=C(C)/[C@@H](O)C(CC2)=O)[C@@]3(C2=O)[C@@]1([C@H](CC4=CNC5=C4C=CC=C5)NC3=O)[H]	Chaetoglobosin O	Potent cytotoxic effect towards P388 cancer ED50 2.4						Penicillium	Other		C[C@H]1C/C=C/[C@H]2[C@H](O)C(=C([C@@H]3[C@]2(C(=O)N[C@H]3Cc2c[nH]c3c2cccc3)C(=O)CCC(=O)[C@@H](/C(=C/1)/C)O)C)C	C32H38N2O5	530.65	39	9	0.47	2	5	4	155.44	119.49	3.18	2.27	3.58	2.03	4.10	3.03	-4.60	1.34e-02	2.52e-05	Moderately soluble	-4.42	2.04e-02	3.84e-05	Moderately soluble	-6.73	9.88e-05	1.86e-07	Poorly soluble	High	No	Yes	No	No	No	No	Yes	-7.93
107	C[C@H]1[C@@]([H])([C@H](CC2=CC=CC=C2)NC3=O)[C@]3(C([C@@H](O)CC(C[C@@H](C)C[C@H](C)C/C=C/4)=O)=O)[C@]4([H])[C@H](O)C1=C	Talachalasins A	HepG2 (3.4) and A549 (10)				No antiviral activity towards HSV-1 (herpes simplex virus) and RSV (respiratory syncytial virus)		Talaromyces	Other	Unusual 16β-methyl group	C[C@@H]1C/C=C/[C@H]2[C@H](O)C(=C)[C@H]([C@@H]3[C@]2(C(=O)N[C@H]3Cc2ccccc2)C(=O)[C@H](CC(=O)C[C@H](C1)C)O)C	C30H39NO5	493.63	36	6	0.57	2	5	3	144.06	103.70	2.44	3.51	3.03	2.41	3.48	2.97	-5.10	3.89e-03	7.89e-06	Moderately soluble	-5.37	2.10e-03	4.25e-06	Moderately soluble	-5.70	9.78e-04	1.98e-06	Moderately soluble	High	No	Yes	No	No	No	No	Yes	-6.82
108	C[C@H]1[C@@]([H])([C@H](CC2=CC=C(O)C=C2)NC3=O)[C@]3(C(/C=C/CC[C@@H](C)C[C@H](C)C/C=C/4)=O)[C@]4([H])[C@H](O)C1=C	Talachalasins B	HepG2 (17.30) and A549 (30.58)				Moderate and potent antiviral activity 20.0 and 12.5 towards HSV-1 and RSV, respectively		Talaromyces	Other	Unusual 16β-methyl group	C[C@@H]1C/C=C/[C@H]2[C@H](O)C(=C)[C@H]([C@@H]3[C@]2(C(=O)N[C@H]3Cc2ccc(cc2)O)C(=O)/C=C/CC[C@H](C1)C)C	C30H39NO4	477.63	35	6	0.53	2	4	3	144.25	86.63	2.44	3.51	4.37	2.41	3.48	2.97	-5.10	3.89e-03	7.89e-06	Moderately soluble	-5.37	2.10e-03	4.25e-06	Moderately soluble	-5.70	9.78e-04	1.98e-06	Moderately soluble	High	No	Yes	No	No	No	No	Yes	-6.82
109	C[C@H]1[C@@]([H])([C@H](CC2=CC=CC=C2)NC3=O)[C@]3([C@H](O)C(O4)=O)[C@@H](/C=C/C[C@@H](C)C[C@H](C)CC(OC)=O)[C@H]4C1=C	Talachalasins C	No cytotoxic effect against HepG2, A549				No antiviral activity towards HSV-1 (herpes simplex virus) and RSV (respiratory syncytial virus)		Talaromyces	Other	Unusual 16β-methyl group	COC(=O)C[C@H](C[C@@H](C/C=C/[C@H]1[C@@H]2OC(=O)[C@H]([C@@]31C(=O)N[C@H]([C@@H]3[C@@H](C2=C)C)Cc1ccccc1)O)C)C	C30H39NO6	509.63	37	6	0.57	10	6	2	145.07	101.93	3.65	4.08	3.23	3.23	5.03	3.85	-5.03	4.75e-03	9.33e-06	Moderately soluble	-5.93	6.05e-04	1.19e-06	Moderately soluble	-6.01	5.00e-04	9.82e-07	Poorly soluble	High	No	Yes	No	No	No	No	Yes	-6.51
110	C[C@H]1[C@]([C@H](CC2=CC=C(OC)C=C2)NC3=O)([H])[C@]3(OC(O/C=C/[C@]4(O)C)=O)[C@](/C=C/C[C@H](C)C4=O)([H])[C@H]5[C@]1(C)O5	Phenochalasin B	Potential anticancer effects with IC50 values ranged from 0.10 to 7.43 against SMMC-7721, A549, HepG2, MCF-7; apoptosis in HepG2						Botryotinia	Other		COc1ccc(cc1)C[C@@H]1NC(=O)[C@@]23[C@H]1[C@H](C)[C@@]1(C)O[C@H]1[C@@H]3/C=C/C[C@H](C)C(=O)[C@](/C=C/OC(=O)O2)(C)O	C29H35NO8	525.59	38	6	0.55	3	8	2	141.68	123.69	3.31	3.49	2.72	1.34	2.70	2.71	-5.22	3.19e-03	6.08e-06	Moderately soluble	-5.77	8.92e-04	1.70e-06	Moderately soluble	-5.00	5.29e-03	1.01e-05	Moderately soluble	High	No	Yes	No	No	No	No	Yes	-7.03
111	C[C@H]1[C@]([C@H](CC2=CC=C(OC)C=C2)NC3=O)([H])[C@]3(OC(OCC[C@]4(O)C)=O)[C@](/C=C/C[C@H](C)C4=O)([H])[C@H]5[C@]1(C)O5	Dioxacyclotridecino	No cytotoxicity against SMMC-7721, A549, HepG2, MCF-7						Botryotinia	Other		COc1ccc(cc1)C[C@@H]1NC(=O)[C@@]23[C@H]1[C@H](C)[C@@]1(C)O[C@H]1[C@@H]3/C=C/C[C@H](C)C(=O)[C@](CCOC(=O)O2)(C)O	C29H37NO8	527.61	38	6	0.62	3	8	2	142.15	123.69	3.27	3.45	2.59	1.41	3.10	2.77	-5.20	3.30e-03	6.26e-06	Moderately soluble	-5.73	9.85e-04	1.87e-06	Moderately soluble	-5.46	1.82e-03	3.44e-06	Moderately soluble	High	No	Yes	No	No	No	No	Yes	-7.07
112	C[C@H]1[C@]([C@H](CC2=CC=C(O)C=C2)NC3=O)([H])[C@]3(OC(CC/C=C4/C)=O)[C@](/C=C/C[C@H](C)C4=O)([H])[C@H]5[C@]1(C)O5	[12]-Cytochalasin	Potential anticancer effects with IC50 values ranged from 0.59 to 0.88 against SMMC-7721, A549, HepG2, MCF-7; apoptosis in HepG2						Botryotinia	Other		O=C1CC/C=C(/C)\C(=O)[C@H](C/C=C/[C@@H]2[C@]3(O1)C(=O)N[C@H]([C@@H]3[C@H](C)[C@@]1([C@H]2O1)C)Cc1ccc(cc1)O)C	C29H35NO6	493.59	36	6	0.55	2	6	2	139.34	105.23	3.34	3.89	3.27	2.50	3.68	3.33	-5.34	2.24e-03	4.55e-06	Moderately soluble	-5.80	7.86e-04	1.59e-06	Moderately soluble	-5.67	1.04e-03	2.11e-06	Moderately soluble	High	No	Yes	No	No	No	No	Yes	-6.55
113	OCC1=C(C)[C@@H]([C@H](CC2=CC=CC=C2)NC3=O)[C@@]43[C@H]([C@@H]1O)/C=C/C[C@H](C)C[C@](O)(C)/C=C/[C@H]4O	Cytochalasins Z10	28.3						Endothia	Endothia		OCC1=C(C)[C@H]2[C@H](Cc3ccccc3)NC(=O)[C@]32[C@H]([C@@H]1O)/C=C/C[C@H](C)C[C@@](/C=C/[C@H]3O)(C)O	C28H37NO5	467.60	34	6	0.54	3	5	5	135.93	110.02	3.00	1.54	1.90	2.10	2.21	2.15	-3.64	1.07e-01	2.28e-04	Soluble	-3.46	1.62e-01	3.47e-04	Soluble	-4.22	2.84e-02	6.08e-05	Moderately soluble	High	No	Yes	No	No	No	No	No	-8.06
114	OCC1=C(C)[C@@H]([C@H](CC2=CC=CC=C2)NC3=O)[C@@]43[C@H]([C@@H]1O)/C=C/C[C@H](C)C[C@](O)(C)/C=C/[C@H]4OC(C)=O	Cytochalasins Z11	24.4						Endothia	Endothia		OCC1=C(C)[C@H]2[C@H](Cc3ccccc3)NC(=O)[C@]32[C@H]([C@@H]1O)/C=C/C[C@H](C)C[C@@](/C=C/[C@H]3OC(=O)C)(C)O	C30H39NO6	509.63	37	6	0.53	5	6	4	145.67	116.09	3.39	2.11	2.47	2.42	2.72	2.62	-4.12	3.87e-02	7.60e-05	Moderately soluble	-4.18	3.38e-02	6.63e-05	Moderately soluble	-4.82	7.70e-03	1.51e-05	Moderately soluble	High	No	Yes	No	No	No	No	Yes	-7.91
115	C[C@@H]1[C@]2(C)[C@@H](O2)[C@@H]3/C=C/C[C@H](C)C[C@](O)(C)/C=C/[C@@H](OC(C)=O)[C@@]34[C@@H]1[C@H](CC5=CC=CC=C5)NC4=O	Epoxycytochalasin H	24.5						Endothia	Endothia		CC(=O)O[C@@H]1/C=C/[C@](C)(O)C[C@H](C/C=C/[C@@H]2[C@]31C(=O)N[C@H]([C@@H]3[C@H](C)[C@@]1([C@H]2O1)C)Cc1ccccc1)C	C30H39NO5	493.63	36	6	0.60	4	5	2	142.83	88.16	4.01	3.91	3.60	3.30	3.66	3.70	-5.22	2.95e-03	5.98e-06	Moderately soluble	-5.46	1.71e-03	3.47e-06	Moderately soluble	-5.49	1.59e-03	3.21e-06	Moderately soluble	High	No	Yes	No	No	No	No	Yes	-6.54
116	C=C1[C@@H](O)[C@@H]2/C=C/C[C@H](C)C[C@](O)(C)/C=C/[C@@H](OC(C)=O)[C@@]23[C@H]([C@H](CC4=CC=CC=C4)NC3=O)[C@@H]1C	Cytochalasin H	10.1	No against S. aureus (SA) and S. aureus (MRSA)		1.42 (progesterone receptor (PR) antagonism ); active with IC50 from 1.01–10.42 (antimigratory abilities against MDA-MB-231)			Endothia	Endothia		CC(=O)O[C@@H]1/C=C/[C@](C)(O)C[C@H](C/C=C/[C@@H]2[C@]31C(=O)N[C@H]([C@@H]3[C@H](C)C(=C)[C@H]2O)Cc1ccccc1)C	C30H39NO5	493.63	36	6	0.53	4	5	3	144.51	95.86	3.16	3.38	3.36	3.22	3.21	3.27	-4.89	6.37e-03	1.29e-05	Moderately soluble	-5.07	4.19e-03	8.48e-06	Moderately soluble	-5.20	3.15e-03	6.38e-06	Moderately soluble	High	No	Yes	No	No	No	No	Yes	-6.91
117	C=C1[C@@H](O)[C@@H]2/C=C/C[C@H](C)C[C@](O)(C)/C=C/[C@@H](O)[C@@]23[C@H]([C@H](CC4=CC=CC=C4)NC3=O)[C@@H]1C	Cytochalasin J	1.5	No against S. aureus (SA) and S. aureus (MRSA)					Endothia	Endothia		C[C@H]1C/C=C/[C@H]2[C@H](O)C(=C)[C@H]([C@@H]3[C@@]2([C@@H](/C=C/[C@](C1)(C)O)O)C(=O)N[C@H]3Cc1ccccc1)C	C28H37NO4	451.60	33	6	0.54	2	4	4	134.77	89.79	3.30	2.81	2.79	2.91	2.71	2.90	-4.41	1.75e-02	3.87e-05	Moderately soluble	-4.35	2.00e-02	4.44e-05	Moderately soluble	-4.59	1.16e-02	2.58e-05	Moderately soluble	High	No	Yes	No	No	No	No	Yes	-7.06
118	CC1=C[C@]([C@]23[C@@]([C@H](CC(C)C)NC3=O)([H])[C@@H]1C)([H])[C@@]4([H])[C@]5(C)C[C@H](CO)C[C@@H](O5)[C@@]4([H])CC2=O	Cytochrysins A		25 (E. faecium )	No against the plant pathogenic fungi P. piricola, F. oxysporum, D. maydis, V. dahlia, S. sclerotiorum, R. solani, and A. Fragriae				Cytospora	Other		OC[C@@H]1C[C@H]2O[C@](C1)(C)[C@H]1[C@@H]2CC(=O)[C@@]23[C@@H]1C=C(C)[C@H]([C@H]3[C@@H](NC2=O)CC(C)C)C	C25H37NO4	415.57	30	0	0.84	3	4	2	120.39	75.63	3.50	2.54	2.73	2.65	3.35	2.95	-3.82	6.31e-02	1.52e-04	Soluble	-3.78	6.97e-02	1.68e-04	Soluble	-4.17	2.81e-02	6.76e-05	Moderately soluble	High	Yes	Yes	No	No	No	No	No	-7.03
119	CC([C@@H](C)[C@@]1([H])[C@H](CC(C)C)NC2=O)=C[C@@H]([C@@]12O3)/C=C(C)/C[C@@H](C)C[C@@H](O)/C=C/C3=O	Cytochrysins B		No antibacterial effect	No against the plant pathogenic fungi P. piricola, F. oxysporum, D. maydis, V. dahlia, S. sclerotiorum, R. solani, and A. Fragriae				Cytospora	Other		CC(C[C@@H]1NC(=O)[C@@]23[C@H]1[C@H](C)C(=C[C@@H]3/C=C(\C)/C[C@H](C[C@H](/C=C/C(=O)O2)O)C)C)C	C25H37NO4	415.57	30	0	0.68	2	4	2	123.93	75.63	3.55	3.90	3.55	3.28	3.06	3.47	-4.74	7.54e-03	1.81e-05	Moderately soluble	-5.19	2.71e-03	6.51e-06	Moderately soluble	-3.92	4.97e-02	1.20e-04	Soluble	High	Yes	Yes	No	No	No	No	Yes	-6.07
120	CC1=C[C@@H]([C@]23[C@@]([C@H](CC(C)C)NC3=O)([H])[C@@H]1C)/C=C(C)/C[C@@H](CO)CC[C@@H](OC)[C@@H](O)C2=O	Cytochrysins C		25 (SA)	No against the plant pathogenic fungi P. piricola, F. oxysporum, D. maydis, V. dahlia, S. sclerotiorum, R. solani, and A. Fragriae				Cytospora	Other		OC[C@H]1CC[C@@H](OC)[C@@H](O)C(=O)[C@@]23[C@@H](/C=C(/C1)\C)C=C(C)[C@H]([C@H]3[C@@H](NC2=O)CC(C)C)C	C26H41NO5	447.61	32	0	0.77	4	5	3	130.07	95.86	3.74	2.68	2.65	1.95	2.93	2.79	-4.04	4.09e-02	9.13e-05	Moderately soluble	-4.35	2.02e-02	4.52e-05	Moderately soluble	-3.96	4.93e-02	1.10e-04	Soluble	High	No	Yes	No	No	No	No	Yes	-7.13
121	C=C1[C@@H](O)[C@@H]2/C=C/C[C@H](C)C[C@H](C)/C=C/[C@@H](O)[C@@]23[C@H]([C@H](CC4=CC=CC=C4)NC3=O)[C@@H]1C	21-O-deacetyl-L-696,474	17.3 (A549), 14.7(HeLa), 26.2 (HepG2)						Endothia	Endothia		C[C@@H]1/C=C/[C@@H](O)[C@@]23C(=O)N[C@H]([C@@H]2[C@H](C)C(=C)[C@H]([C@@H]3/C=C/C[C@@H](C1)C)O)Cc1ccccc1	C28H37NO3	435.60	32	6	0.54	2	3	3	133.57	69.56	3.64	3.59	3.67	3.74	3.21	3.57	-4.81	6.76e-03	1.55e-05	Moderately soluble	-4.74	7.98e-03	1.83e-05	Moderately soluble	-4.96	4.78e-03	1.10e-05	Moderately soluble	High	Yes	Yes	No	No	No	No	Yes	-6.41
122	C=C1[C@@H](O)[C@@H]2/C=C/C[C@H](C)C[C@H](C)/C=C/[C@@H](O)[C@@]23[C@H]([C@H](CC4=C(O)C=CC=C4)NC3=O)[C@@H]1C	Phomopsichalasin G	no cytotoxic effect toward MCF-7, A549 and MCF-7; 24.5 (HeLa), 11.0 (HepG2); potent cytotoxic effect 7.1, 3.4, 6.4, 7.5 and 8.6 towards A2780, MDA-MB-231, A549, HCT-8, and HCT-8/T, respectively						Endothia	Endothia		C[C@@H]1/C=C/[C@@H](O)[C@@]23C(=O)N[C@H]([C@@H]2[C@H](C)C(=C)[C@H]([C@@H]3/C=C/C[C@@H](C1)C)O)Cc1ccccc1O	C28H37NO4	451.60	33	6	0.54	2	4	4	135.59	89.79	3.17	3.89	3.38	3.18	2.73	3.27	-5.09	3.64e-03	8.07e-06	Moderately soluble	-5.47	1.52e-03	3.36e-06	Moderately soluble	-4.37	1.93e-02	4.28e-05	Moderately soluble	High	No	Yes	No	No	No	No	Yes	-6.29
123	C=C1[C@@H](O)[C@@H]2/C=C/C[C@H](C)C[C@H](C)/C=C/[C@@H](O)[C@@]23[C@H]([C@H](CC4=CC(O)=CC=C4)NC3=O)[C@@H]1C	Diaporthichalasins A	10.1 (HepG2)	antibacterial					Endothia	Endothia		C[C@@H]1/C=C/[C@@H](O)[C@@]23C(=O)N[C@H]([C@@H]2[C@H](C)C(=C)[C@H]([C@@H]3/C=C/C[C@@H](C1)C)O)Cc1cccc(c1)O	C28H37NO4	451.60	33	6	0.54	2	4	4	135.59	89.79	3.17	3.89	3.38	3.18	2.73	3.27	-5.09	3.64e-03	8.07e-06	Moderately soluble	-5.47	1.52e-03	3.36e-06	Moderately soluble	-4.37	1.93e-02	4.28e-05	Moderately soluble	High	No	Yes	No	No	No	No	Yes	-6.29
124	C=C1[C@@H](O)[C@@H]2/C=C/C[C@H](C)C[C@H](C)/C=C/[C@@H](O)[C@@]23[C@H]([C@H](CC4=CC=C(O)C=C4)NC3=O)[C@@H]1C	Diaporthichalasins B	22.1 (HeLa), 21.2 (HepG2)						Endothia	Endothia		C[C@@H]1/C=C/[C@@H](O)[C@@]23C(=O)N[C@H]([C@@H]2[C@H](C)C(=C)[C@H]([C@@H]3/C=C/C[C@@H](C1)C)O)Cc1ccc(cc1)O	C28H37NO4	451.60	33	6	0.54	2	4	4	135.59	89.79	3.17	3.89	3.38	3.18	2.73	3.27	-5.09	3.64e-03	8.07e-06	Moderately soluble	-5.47	1.52e-03	3.36e-06	Moderately soluble	-4.37	1.93e-02	4.28e-05	Moderately soluble	High	No	Yes	No	No	No	No	Yes	-6.29
125	C=C1[C@@H](O)[C@@H]2/C=C/C[C@H](CO)C[C@H](C)/C=C/[C@@H](O)[C@@]23[C@H]([C@H](CC4=CC=CC=C4)NC3=O)[C@@H]1C	Diaporthichalasins C	12 (A549), 15.2 (HeLa), 38.1 (HepG2)						Endothia	Endothia		C[C@@H]1/C=C/[C@@H](O)[C@@]23C(=O)N[C@H]([C@@H]2[C@H](C)C(=C)[C@H]([C@@H]3/C=C/C[C@@H](C1)C)O)Cc1ccc(cc1)O	C28H37NO4	451.60	33	6	0.54	2	4	4	135.59	89.79	3.17	3.89	3.38	3.18	2.73	3.27	-5.09	3.64e-03	8.07e-06	Moderately soluble	-5.47	1.52e-03	3.36e-06	Moderately soluble	-4.37	1.93e-02	4.28e-05	Moderately soluble	High	No	Yes	No	No	No	No	Yes	-6.29
126	CC1=C(C)[C@@H]([C@H](CC2=CC=CC=C2)NC3=O)[C@@]43[C@H]([C@@H]1O)/C=C/C[C@H](C)C[C@H](C)/C=C/[C@H]4O	Diaporthichalasins D	13.7 (A549), 15.3 (HeLa), 8.8 (HepG2)						Endothia	Endothia		C[C@@H]1/C=C/[C@@H](O)[C@]23C(=O)N[C@H]([C@@H]3C(=C([C@H]([C@@H]2/C=C/C[C@@H](C1)C)O)C)C)Cc1ccccc1	C28H37NO3	435.60	32	6	0.54	2	3	3	133.57	69.56	3.17	3.89	3.82	3.18	2.73	3.27	-5.09	3.64e-03	8.07e-06	Moderately soluble	-5.47	1.52e-03	3.36e-06	Moderately soluble	-4.37	1.93e-02	4.28e-05	Moderately soluble	High	No	Yes	No	No	No	No	Yes	-6.29
127	C=C1[C@@H](O)[C@@H]2/C=C/C[C@H](C)[C@@H](O)[C@H](C)/C=C/[C@@H](O)[C@@]23[C@H]([C@H](CC4=CC=CC=C4)NC3=O)[C@@H]1C	Diaporthichalasins E	30.6 (HepG2)						Endothia	Endothia		O[C@@H]1[C@@H](C)C/C=C/[C@@H]2[C@]3([C@@H](/C=C/[C@H]1C)O)C(=O)N[C@H]([C@@H]3[C@@H](C(=C)[C@H]2O)C)Cc1ccccc1	C28H37NO4	451.60	33	6	0.54	2	4	4	134.73	89.79	3.17	3.89	2.64	3.18	2.73	3.27	-5.09	3.64e-03	8.07e-06	Moderately soluble	-5.47	1.52e-03	3.36e-06	Moderately soluble	-4.37	1.93e-02	4.28e-05	Moderately soluble	High	No	Yes	No	No	No	No	Yes	-6.29
128	C=C1[C@@H](O)[C@@H]2/C=C/C[C@](O)(C)C[C@H](C)/C=C/[C@@H](O)[C@@]23[C@H]([C@H](CC4=CC=CC=C4)NC3=O)[C@@H]1C	Diaporthichalasins F	34.7 (HeLa), 16.5 (HepG2)						Endothia	Endothia		O[C@@H]1[C@@H](C)C/C=C/[C@@H]2[C@]3([C@@H](/C=C/[C@H]1C)O)C(=O)N[C@H]([C@@H]3[C@@H](C(=C)[C@H]2O)C)Cc1ccccc1	C28H37NO4	451.60	33	6	0.54	2	4	4	134.73	89.79	3.17	3.89	2.64	3.18	2.73	3.27	-5.09	3.64e-03	8.07e-06	Moderately soluble	-5.47	1.52e-03	3.36e-06	Moderately soluble	-4.37	1.93e-02	4.28e-05	Moderately soluble	High	No	Yes	No	No	No	No	Yes	-6.29
129	C[C@@H]1C(CO)=C[C@@H]2/C=C/C[C@H](C)C[C@H](C)/C=C/[C@@H](O)[C@@]23[C@@H]1[C@H](CC4=CC=C(O)C=C4)NC3=O	Diaporthichalasins G	no cytotoxicity against A549, HeLa, HepG2 and MCF–7						Endothia	Endothia		OCC1=C[C@@H]2/C=C/C[C@H](C)C[C@@H](/C=C/[C@H]([C@]32[C@@H]([C@@H]1C)[C@H](Cc1ccc(cc1)O)NC3=O)O)C	C28H37NO4	451.60	33	6	0.54	3	4	4	135.59	89.79	3.36	3.76	3.38	3.18	2.73	3.28	-4.95	5.12e-03	1.13e-05	Moderately soluble	-5.34	2.07e-03	4.59e-06	Moderately soluble	-4.37	1.93e-02	4.28e-05	Moderately soluble	High	No	Yes	No	No	No	No	Yes	-6.39
130	C[C@@H]1C(COC(C)=O)=C[C@@H]2/C=C/C[C@H](C)C[C@H](C)/C=C/[C@@H](O)[C@@]23[C@@H]1[C@H](CC4=CC=C(O)C=C4)NC3=O	Diaporthichalasins H	9.9 to 32.1						Endothia	Endothia		C[C@@H]1/C=C/[C@@H](O)[C@]23C(=O)N[C@H]([C@@H]3[C@@H](C(=C[C@@H]2/C=C/C[C@@H](C1)C)COC(=O)C)C)Cc1ccc(cc1)O	C30H39NO5	493.63	36	6	0.53	5	5	3	145.33	95.86	3.70	4.34	3.95	3.49	3.23	3.74	-5.43	1.84e-03	3.73e-06	Moderately soluble	-6.07	4.22e-04	8.55e-07	Poorly soluble	-4.98	5.22e-03	1.06e-05	Moderately soluble	High	No	Yes	No	No	No	No	Yes	-6.23
131	C=C1[C@@H](O)[C@@H]2/C=C/C[C@H](C)C[C@@](C)(OC)/C=C/[C@@H](O)[C@@]23[C@H]([C@H](CC4=CC=CC=C4)NC3=O)[C@@H]1C	Cytochalasins J1				Active with IC50 from 1.01–10.42 (antimigratory abilities against MDA-MB-231)			Endothia	Endothia		CO[C@@]1(C)/C=C/[C@@H](O)[C@@]23C(=O)N[C@H]([C@@H]2[C@H](C)C(=C)[C@H]([C@@H]3/C=C/C[C@@H](C1)C)O)Cc1ccccc1	C29H39NO4	465.62	34	6	0.55	3	4	3	139.50	78.79	4.00	3.35	3.44	3.11	3.26	3.43	-4.77	7.91e-03	1.70e-05	Moderately soluble	-4.68	9.68e-03	2.08e-05	Moderately soluble	-5.28	2.46e-03	5.28e-06	Moderately soluble	High	No	Yes	No	No	No	No	Yes	-6.76
132	C=C1[C@@H](O)[C@@H]2/C=C/C[C@H](C)/C=C(C)\C=C\[C@@H](O)[C@@]23[C@H]([C@H](CC4=CC=CC=C4)NC3=O)[C@@H]1C	Cytochalasins J2							Endothia	Endothia		C[C@H]1C/C=C/[C@H]2[C@H](O)C(=C)[C@H]([C@@H]3[C@@]2([C@@H](/C=C/C(=C\1)/C)O)C(=O)N[C@H]3Cc1ccccc1)C	C28H35NO3	433.58	32	6	0.46	2	3	3	133.10	69.56	3.50	3.61	3.59	3.66	3.20	3.51	-4.81	6.73e-03	1.55e-05	Moderately soluble	-4.76	7.57e-03	1.75e-05	Moderately soluble	-4.94	4.93e-03	1.14e-05	Moderately soluble	High	Yes	Yes	No	No	No	No	Yes	-6.38
133	C=C1[C@@H](O2)[C@H]3[C@H]4[C@H]2C[C@H](C)C=C(C)[C@@H]4C[C@@H](O)[C@@]35[C@H]([C@H](CC6=CC=CC=C6)NC5=O)[C@@H]1C	Cytochalasins J3		no against S. aureus (SA) and S. aureus (MRSA)					Endothia	Endothia		C[C@H]1C[C@H]2O[C@H]3[C@H]4[C@@H]2[C@H](C(=C1)C)C[C@H]([C@@]14C(=O)N[C@H]([C@@H]1[C@@H](C3=C)C)Cc1ccccc1)O	C28H35NO3	433.58	32	6	0.61	2	3	2	129.74	58.56	3.74	3.32	3.52	3.82	3.68	3.62	-4.63	1.02e-02	2.36e-05	Moderately soluble	-4.23	2.58e-02	5.94e-05	Moderately soluble	-5.49	1.40e-03	3.24e-06	Moderately soluble	High	Yes	Yes	No	No	No	No	No	-6.59
134	C=C1[C@@H](O)[C@@H]2/C=C/C[C@H](C)/C=C(C)\C=C\[C@@H](OC(C)=O)[C@@]23[C@H]([C@H](CC4=CC=CC=C4)NC3=O)[C@@H]1C	Longichalasin B		no against S. aureus (SA) and S. aureus (MRSA)					Endothia	Endothia		CC(=O)O[C@@H]1/C=C/C(=C\[C@H](C/C=C/[C@@H]2[C@]31C(=O)N[C@H]([C@@H]3[C@H](C)C(=C)[C@H]2O)Cc1ccccc1)C)/C	C30H37NO4	475.62	35	6	0.47	4	4	2	142.83	75.63	4.12	4.19	4.16	3.96	3.69	4.02	-5.29	2.43e-03	5.11e-06	Moderately soluble	-5.49	1.55e-03	3.26e-06	Moderately soluble	-5.55	1.33e-03	2.81e-06	Moderately soluble	High	Yes	Yes	No	No	No	No	Yes	-6.23
135	CC1=C[C@@H]2/C=C/C[C@H](C)C[C@](O)(C)/C=C/[C@@H](OC(C)=O)[C@@]23[C@H]([C@H](CC4=CC=CC=C4)NC3=O)[C@@H]1C	RKS-1778		No against S. aureus (SA) and S. aureus (MRSA)		Active with IC50 from 1.01–10.42 (antimigratory abilities against MDA-MB-231)			Endothia	Endothia		CC(=O)O[C@@H]1/C=C/[C@](C)(O)C[C@H](C/C=C/[C@@H]2[C@]31C(=O)N[C@H]([C@@H]3[C@@H](C(=C2)C)C)Cc1ccccc1)C	C30H39NO4	477.63	35	6	0.53	4	4	2	143.35	75.63	4.30	4.50	4.39	4.03	3.82	4.21	-5.50	1.51e-03	3.17e-06	Moderately soluble	-5.81	7.41e-04	1.55e-06	Moderately soluble	-5.77	8.11e-04	1.70e-06	Moderately soluble	High	No	Yes	No	No	No	No	Yes	-6.02
136	C=C1[C@@H](O)[C@H]2[C@@]3([C@H](O)[C@H]4[C@H]2[C@H](O)C[C@H](C)C/C(C)=C\4)[C@H]([C@H](CC5=CC=CC=C5)NC3=O)[C@@H]1C	Phomopchalasin A		20 (SA) and 20 (MRSA)					Endothia	Endothia		C[C@@H]1CC(=C[C@@H]2[C@@H]([C@@H](C1)O)[C@H]1[C@H](O)C(=C)[C@H]([C@@H]3[C@@]1([C@@H]2O)C(=O)N[C@H]3Cc1ccccc1)C)C	C28H37NO4	451.60	33	6	0.61	2	4	4	133.09	89.79	3.36	2.43	2.48	2.99	2.71	2.79	-4.17	3.03e-02	6.71e-05	Moderately soluble	-3.96	4.97e-02	1.10e-04	Soluble	-4.59	1.16e-02	2.58e-05	Moderately soluble	High	No	Yes	No	No	No	No	No	-7.33
137	C=C1[C@@H](O)[C@H]2[C@@H](O)[C@H]3[C@H](C=C(C)C[C@@H](C)C3)[C@@H](O)[C@@]24[C@H]([C@H](CC5=CC=CC=C5)NC4=O)[C@@H]1C	Ueckerchalasins A	No cytotoxic effect towards HepG2 and or Hela	No against S. aureus (SA) and S. aureus (MRSA)					Endothia	Endothia	Unusual 5/6/6/7-fused heterocycle core	C[C@@H]1CC(=C[C@H]2[C@@H](C1)[C@H](O)[C@H]1[C@]3([C@@H]2O)C(=O)N[C@H]([C@@H]3[C@@H](C(=C)[C@H]1O)C)Cc1ccccc1)C	C28H37NO4	451.60	33	6	0.61	2	4	4	133.09	89.79	3.35	2.43	2.48	2.99	2.71	2.79	-4.17	3.03e-02	6.71e-05	Moderately soluble	-3.96	4.97e-02	1.10e-04	Soluble	-4.59	1.16e-02	2.58e-05	Moderately soluble	High	No	Yes	No	No	No	No	No	-7.33
138	C=C1[C@@H](O)[C@H]2[C@@H](O)[C@H]3[C@@H](C=C(C)C[C@@H](C)C3)[C@@H](O)[C@@]24[C@H]([C@H](CC5=CC=CC=C5)NC4=O)[C@@H]1C	Ueckerchalasins B	No cytotoxic effect towards HepG2 and or Hela	No against S. aureus (SA) and S. aureus (MRSA)					Endothia	Endothia	Unusual 5/6/6/7-fused heterocycle core	C[C@@H]1CC(=C[C@@H]2[C@@H](C1)[C@H](O)[C@H]1[C@]3([C@@H]2O)C(=O)N[C@H]([C@@H]3[C@@H](C(=C)[C@H]1O)C)Cc1ccccc1)C	C28H37NO4	451.60	33	6	0.61	2	4	4	133.09	89.79	3.69	2.43	2.48	2.99	2.71	2.86	-4.17	3.03e-02	6.71e-05	Moderately soluble	-3.96	4.97e-02	1.10e-04	Soluble	-4.59	1.16e-02	2.58e-05	Moderately soluble	High	No	Yes	No	No	No	No	No	-7.33
139	C=C1[C@@H](O)[C@H]2C[C@]3(O)C(C=C(C)C[C@@H](C)C3)=C[C@@]24[C@H]([C@H](CC5=CC=CC=C5)NC4=O)[C@@H]1C	Ueckerchalasins C	Weak cytotoxic effect towards HepG2 and or Hela 18.0 to 36.4 μM	20 (SA) and 40 (MRSA)					Endothia	Endothia	Unusual 5/6/6/7-fused heterocycle core	C[C@@H]1CC(=CC2=C[C@@]34[C@H](C[C@]2(C1)O)[C@H](O)C(=C)[C@H]([C@H]4[C@@H](NC3=O)Cc1ccccc1)C)C	C28H35NO3	433.58	32	6	0.54	2	3	3	131.50	69.56	3.82	2.99	3.57	3.74	3.99	3.62	-4.42	1.65e-02	3.81e-05	Moderately soluble	-4.11	3.33e-02	7.68e-05	Moderately soluble	-5.84	6.22e-04	1.44e-06	Moderately soluble	High	Yes	Yes	No	No	No	No	Yes	-6.82
140	CC1=C[C@@H]2/C=C/C[C@H](C)C[C@](O)(C)/C=C/[C@@H](OC(C)=O)[C@@]23[C@H]([C@H]([C@@H](O)C4=CC=CC=C4)NC3=O)[C@@H]1C	Ueckerchalasins D	Weak cytotoxic effect towards HepG2 and or Hela 18.0 to 36.4 μM	No against S. aureus (SA) and S. aureus (MRSA)					Endothia	Endothia		CC(=O)O[C@@H]1/C=C/[C@](C)(O)C[C@H](C/C=C/[C@@H]2[C@]31C(=O)N[C@H]([C@@H]3[C@@H](C(=C2)C)C)[C@H](c1ccccc1)O)C	C30H39NO5	493.63	36	6	0.53	4	5	3	144.51	95.86	4.15	3.39	3.55	3.22	3.04	3.47	-4.90	6.28e-03	1.27e-05	Moderately soluble	-5.08	4.09e-03	8.28e-06	Moderately soluble	-4.82	7.45e-03	1.51e-05	Moderately soluble	High	No	Yes	No	No	No	No	Yes	-6.90
141	CC1=C[C@@H]2/C=C/C[C@H](C)[C@@H](O)[C@](O)(C)/C=C/[C@@H](OC(C)=O)[C@@]23[C@H]([C@H](CC4=CC=CC=C4)NC3=O)[C@@H]1C	Ueckerchalasins E	Weak cytotoxic effect towards HepG2 and or Hela 18.0 to 36.4 μM	No against S. aureus (SA) and S. aureus (MRSA)					Endothia	Endothia		CC(=O)O[C@@H]1/C=C/[C@](C)(O)[C@H](O)[C@H](C/C=C/[C@@H]2[C@]31C(=O)N[C@H]([C@@H]3[C@@H](C(=C2)C)C)Cc1ccccc1)C	C30H39NO5	493.63	36	6	0.53	4	5	3	144.51	95.86	4.11	3.53	3.36	3.22	2.93	3.43	-4.98	5.12e-03	1.04e-05	Moderately soluble	-5.23	2.92e-03	5.92e-06	Moderately soluble	-4.95	5.58e-03	1.13e-05	Moderately soluble	High	No	Yes	No	No	No	No	Yes	-6.80
142	C=C1[C@@H](O2)[C@H]3[C@H]4[C@H]2C[C@H](C)C=C(C)[C@@H]4C[C@@H](O)[C@@]35[C@H]([C@H](CC6=CC=C(O)C=C6)NC5=O)[C@@H]1C	4′-Hydroxycytochalasin J3	No cytotoxic effect towards HepG2 and or Hela	No against S. aureus (SA) and S. aureus (MRSA)					Endothia	Endothia		C[C@H]1C[C@H]2O[C@H]3[C@H]4[C@@H]2[C@H](C(=C1)C)C[C@H]([C@@]14C(=O)N[C@H]([C@@H]1[C@@H](C3=C)C)Cc1ccc(cc1)O)O	C28H35NO4	449.58	33	6	0.61	2	4	3	131.76	78.79	3.32	2.96	3.23	3.26	3.20	3.19	-4.49	1.44e-02	3.20e-05	Moderately soluble	-4.28	2.37e-02	5.28e-05	Moderately soluble	-4.90	5.67e-03	1.26e-05	Moderately soluble	High	Yes	Yes	No	No	No	No	No	-6.94
143	CC1=C(O2)[C@]3([H])[C@@]4([H])[C@H]2C[C@H](C)C=C(C)[C@]4([H])[C@@H](O)[C@@H](O)[C@@]35[C@@]([C@H](CC6=CC=CC=C6)NC5=O)([H])[C@@H]1C	Phomopchalasins B				19.1 (antimigratory ability towards MDA-MB-231)			Phomopsis	Phomopsis		C[C@H]1C[C@H]2OC3=C(C)[C@H]([C@@H]4[C@]5([C@H]3[C@@H]2[C@H](C(=C1)C)[C@@H](O)[C@H]5O)C(=O)N[C@H]4Cc1ccccc1)C	C28H35NO4	449.58	33	6	0.61	2	4	3	130.90	78.79	3.30	2.45	2.84	2.99	2.90	2.90	-4.17	3.02e-02	6.71e-05	Moderately soluble	-3.75	8.03e-02	1.79e-04	Soluble	-4.87	6.06e-03	1.35e-05	Moderately soluble	High	Yes	Yes	No	No	No	No	No	-7.30
144	CC1=C(C)[C@]([C@H](CC2=CC=CC=C2)NC3=O)([H])[C@@]43[C@@]([C@@H]1OO)([H])/C=C/C[C@H](C)C[C@](O)(C)/C=C/[C@H]4OC(C)=O	Phomopchalasins C	21.1 (A-549), 14.9 (HL-60), 22.7 (SMMC-7721)			12.7 (antimigratory ability towards MDA-MB-231), 11.2 (NO production )			Phomopsis	Phomopsis	Unusual hydroperoxyl motif in position C-7	OO[C@@H]1C(=C(C)[C@@H]2[C@]3([C@H]1/C=C/C[C@H](C)C[C@@](/C=C/[C@H]3OC(=O)C)(C)O)C(=O)N[C@H]2Cc1ccccc1)C	C30H39NO6	509.63	37	6	0.53	5	6	3	146.00	105.09	3.78	2.86	4.00	3.23	2.87	3.35	-4.59	1.31e-02	2.56e-05	Moderately soluble	-4.73	9.58e-03	1.88e-05	Moderately soluble	-5.12	3.87e-03	7.60e-06	Moderately soluble	High	No	Yes	No	No	No	No	Yes	-7.38
145	CC1=C[C@]2([H])/C=C/C[C@H](C)C[C@H](C)/C=C/[C@@H](O)[C@@]23[C@@]([C@H](CC4=CC=C(O)C=C4)NC3=O)([H])[C@@H]1C	Phomopsichalasin F							Phomopsis	Phomopsis		C[C@@H]1/C=C/[C@@H](O)[C@]23C(=O)N[C@H]([C@@H]3[C@@H](C(=C[C@@H]2/C=C/C[C@@H](C1)C)C)C)Cc1ccc(cc1)O	C28H37NO3	435.60	32	6	0.54	2	3	3	134.43	69.56	3.59	5.01	4.41	4.01	3.34	4.07	-5.70	8.62e-04	1.98e-06	Moderately soluble	-6.21	2.68e-04	6.15e-07	Poorly soluble	-4.94	4.97e-03	1.14e-05	Moderately soluble	High	Yes	Yes	No	No	No	No	Yes	-5.40
146	CC1=C[C@]2([H])/C=C/C[C@H](C)C[C@H](C)/C=C/[C@@H](OC(C)=O)[C@@]23[C@@]([C@H](CC4=CC=CC=C4)NC3=O)([H])[C@@H]1C	18-Deoxycytochalasin H (7, L-696,474)							Phomopsis	Phomopsis		C[C@@H]1/C=C/[C@@H](OC(=O)C)[C@]23C(=O)N[C@H]([C@@H]3[C@@H](C(=C[C@@H]2/C=C/C[C@@H](C1)C)C)C)Cc1ccccc1	C30H39NO3	461.64	34	6	0.53	4	3	1	142.15	55.40	4.42	5.94	5.27	4.86	4.32	4.96	-6.31	2.26e-04	4.89e-07	Poorly soluble	-6.88	6.11e-05	1.32e-07	Poorly soluble	-6.14	3.32e-04	7.19e-07	Poorly soluble	High	Yes	No	No	No	Yes	No	Yes	-4.90
147	O=C1N[C@@H](CC2=CC=CC=C2)[C@]3([H])[C@H](C)C(C(O)=O)=C[C@]4([H])/C=C/C[C@H](C)C[C@](O)(C)/C=C/[C@@H](OC(C)=O)[C@]431	Phomopsichalasins D	No cytotoxic activity against A2780, MDA-MB-231, A549, HCT-8, and HCT-8/T						Phomopsis	Phomopsis		CC(=O)O[C@@H]1/C=C/[C@](C)(O)C[C@H](C/C=C/[C@@H]2[C@]31C(=O)N[C@H]([C@@H]3[C@@H](C(=C2)C(=O)O)C)Cc1ccccc1)C	C30H37NO6	507.62	37	6	0.50	5	6	3	145.12	112.93	3.50	3.83	3.45	3.16	2.76	3.34	-5.19	3.28e-03	6.45e-06	Moderately soluble	-5.90	6.43e-04	1.27e-06	Moderately soluble	-4.72	9.61e-03	1.89e-05	Moderately soluble	High	No	Yes	No	No	No	No	Yes	-6.68
148	O=C1N[C@@H](CC2=CC=CC=C2)[C@]3([H])[C@H](C)C(C(O)=O)=C[C@]4([H])/C=C/C[C@H](C)C[C@](O)(C)/C=C/[C@@H](O)[C@]431	Phomopsichalasins F							Phomopsis	Phomopsis		C[C@H]1C/C=C/[C@H]2C=C(C(=O)O)[C@H]([C@@H]3[C@@]2([C@@H](/C=C/[C@](C1)(C)O)O)C(=O)N[C@H]3Cc1ccccc1)C	C28H35NO5	465.58	34	6	0.50	3	5	4	135.38	106.86	2.77	3.26	2.88	2.83	2.25	2.80	-4.71	9.02e-03	1.94e-05	Moderately soluble	-5.18	3.09e-03	6.63e-06	Moderately soluble	-4.12	3.55e-02	7.62e-05	Moderately soluble	High	No	Yes	No	No	No	No	Yes	-6.83
149	CC1=C(C)[C@]([C@H](CC2=CC=CC=C2)NC3=O)([H])[C@@]43[C@@]([C@@H]1O)([H])/C=C/C[C@H](C)C[C@](O)(C)/C=C/[C@H]4OC(C)=O	Cytochalasin N				77.8 (NO-production )			Phomopsis	Phomopsis		CC(=O)O[C@@H]1/C=C/[C@](C)(O)C[C@H](C/C=C/[C@@H]2[C@]31C(=O)N[C@H]([C@@H]3C(=C([C@H]2O)C)C)Cc1ccccc1)C	C30H39NO5	493.63	36	6	0.53	4	5	3	144.51	95.86	3.98	2.81	3.50	3.22	3.32	3.37	-4.53	1.46e-02	2.95e-05	Moderately soluble	-4.48	1.63e-02	3.31e-05	Moderately soluble	-5.40	1.98e-03	4.01e-06	Moderately soluble	High	No	Yes	No	No	No	No	Yes	-7.32
150	CC1=C(C)[C@]([C@H](CC2=CC=CC=C2)NC3=O)([H])[C@@]43[C@@](C1=O)([H])/C=C/C[C@H](C)C[C@](O)(C)/C=C/[C@H]4OC(C)=O	Phomocytochalasin							Phomopsis	Phomopsis		CC(=O)O[C@@H]1/C=C/[C@](C)(O)C[C@H](C/C=C/[C@@H]2[C@]31C(=O)N[C@H]([C@@H]3C(=C(C2=O)C)C)Cc1ccccc1)C	C30H37NO5	491.62	36	6	0.50	4	5	2	143.55	92.70	3.73	3.49	3.71	3.15	3.91	3.60	-4.95	5.57e-03	1.13e-05	Moderately soluble	-5.12	3.73e-03	7.59e-06	Moderately soluble	-6.09	3.97e-04	8.07e-07	Poorly soluble	High	No	Yes	No	No	No	No	Yes	-6.82
151	O=C1N[C@@H](CC(C)C)[C@]2([H])[C@H](C)[C@@H]3[C@@H](O3)[C@]4([H])/C=C/[C@@H](O)CCCC5=NO[C@](C5)(O)[C@]421	Phomopsisins A	No significant cytotoxic effect against SW480, MCF-7, SMMC-7721, A549, and HL-60						Phomopsis	Phomopsis		CC(C[C@@H]1NC(=O)[C@]23[C@H]1[C@H](C)[C@H]1O[C@H]1[C@@H]2/C=C/[C@@H](O)CCCC1=NO[C@@]3(O)C1)C	C22H32N2O5	404.50	29	0	0.82	2	6	3	115.02	103.68	2.72	1.12	0.97	1.62	1.94	1.67	-2.92	4.85e-01	1.20e-03	Soluble	-2.89	5.20e-01	1.29e-03	Soluble	-2.32	1.93e+00	4.76e-03	Soluble	High	No	Yes	No	No	No	No	No	-7.97
152	O=C1N[C@@H](CC(C)C)[C@]2([H])[C@H](C)[C@@H]3[C@@H](O3)[C@]([C@@]421)([H])/C=C/[C@@H](O)CCCCCC4=O	Phomopsisins B							Phomopsis	Phomopsis		CC(C[C@@H]1NC(=O)[C@@]23[C@H]1[C@H](C)[C@H]1O[C@H]1[C@@H]3/C=C/[C@@H](O)CCCCCC2=O)C	C22H33NO4	375.50	27	0	0.82	2	4	2	108.04	78.93	2.96	2.83	2.24	2.01	2.59	2.52	-3.82	5.70e-02	1.52e-04	Soluble	-4.15	2.69e-02	7.15e-05	Moderately soluble	-3.05	3.32e-01	8.83e-04	Soluble	High	No	Yes	No	No	No	No	No	-6.58
153	O=C1N[C@@H](CC(C)C)[C@]2([H])[C@H](C)C=C[C@]([C@@]321)([H])/C=C/[C@@H](O)CC[C@H](O)CCC3=O	Phomopsisins C				32.38 (NO-production )			Phomopsis	Phomopsis		CC(C[C@@H]1NC(=O)[C@@]23[C@H]1[C@H](C)C=C[C@@H]3/C=C/[C@@H](O)CC[C@@H](CCC2=O)O)C	C22H33NO4	375.50	27	0	0.73	2	4	3	109.76	86.63	2.98	2.54	2.00	1.92	1.84	2.26	-3.64	8.68e-02	2.31e-04	Soluble	-4.01	3.70e-02	9.86e-05	Moderately soluble	-2.51	1.17e+00	3.10e-03	Soluble	High	No	Yes	No	No	No	No	No	-6.79
154	O=C1N[C@@H](CC(C)C)[C@]2([H])[C@H](C)[C@@H]3[C@@H](O3)[C@]([C@@]421)([H])/C=C/[C@@H](O)CC[C@H](O)CCC4=O	Xylarisin							Phomopsis	Phomopsis		CC(C[C@@H]1NC(=O)[C@@]23[C@H]1[C@H](C)[C@H]1O[C@H]1[C@@H]3/C=C/[C@@H](O)CC[C@@H](CCC2=O)O)C	C22H33NO5	391.50	28	0	0.82	2	5	3	109.20	99.16	2.51	1.68	1.21	1.20	1.70	1.66	-3.19	2.51e-01	6.40e-04	Soluble	-3.38	1.64e-01	4.20e-04	Soluble	-2.24	2.27e+00	5.81e-03	Soluble	High	No	Yes	No	No	No	No	No	-7.50
155	C=C1[C@@H](O)[C@]2([H])/C=C/C[C@H](C)C[C@@](C)(OC(C)=O)/C=C/[C@@H](OC(C)=O)[C@@]23[C@@]([C@H](CC4=CC=CC=C4)NC3=O)([H])[C@@H]1C	18-Acetoxycytochalasin H				Active with IC50 from 1.01–10.42 (antimigratory abilities against MDA-MB-231)			Phomopsis	Phomopsis		CC(=O)O[C@@H]1/C=C/[C@@](C)(C[C@H](C/C=C/[C@@H]2[C@]31C(=O)N[C@H]([C@@H]3[C@@H](C(=C)[C@H]2O)C)Cc1ccccc1)C)OC(=O)C	C32H41NO6	535.67	39	6	0.53	6	6	2	154.25	101.93	4.32	3.96	3.93	3.54	3.73	3.89	-5.37	2.27e-03	4.23e-06	Moderately soluble	-5.80	8.47e-04	1.58e-06	Moderately soluble	-5.80	8.53e-04	1.59e-06	Moderately soluble	High	No	Yes	No	No	No	No	Yes	-6.76
156	C=C1[C@@H](O)[C@]2([H])/C=C/C[C@H](C)C[C@@](C)(OCC)/C=C/[C@@H](OC(C)=O)[C@@]23[C@@]([C@H](CC4=CC=CC=C4)NC3=O)([H])[C@@H]1C	18-ethoxycytochalasin H				Active with IC50 from 1.01–10.42 (antimigratory abilities against MDA-MB-231)			Phomopsis	Phomopsis		CC(=O)O[C@@H]1/C=C/[C@@](C)(C[C@H](C/C=C/[C@@H]2[C@]31C(=O)N[C@H]([C@@H]3[C@@H](C(=C)[C@H]2O)C)Cc1ccccc1)C)OC(=O)C	C32H41NO6	535.67	39	6	0.53	6	6	2	154.25	101.93	4.32	3.96	3.93	3.54	3.73	3.89	-5.37	2.27e-03	4.23e-06	Moderately soluble	-5.80	8.47e-04	1.58e-06	Moderately soluble	-5.80	8.53e-04	1.59e-06	Moderately soluble	High	No	Yes	No	No	No	No	Yes	-6.76
157	C=C1[C@@H](O)[C@]2([H])/C=C/C[C@H](C)C[C@@](C)(OC(C)=O)/C=C/[C@@H](O)[C@@]23[C@@]([C@H](CC4=CC=CC=C4)NC3=O)([H])[C@@H]1C	18-Acetoxycytochalasin J				Active with IC50 from 1.01–10.42 (antimigratory abilities against MDA-MB-231)			Phomopsis	Phomopsis		C[C@H]1C/C=C/[C@H]2[C@H](O)C(=C)[C@H]([C@@H]3[C@@]2([C@@H](/C=C/[C@](C1)(C)OC(=O)C)O)C(=O)N[C@H]3Cc1ccccc1)C	C30H39NO5	493.63	36	6	0.53	4	5	3	144.51	95.86	3.80	3.38	3.36	3.22	3.21	3.39	-4.89	6.37e-03	1.29e-05	Moderately soluble	-5.07	4.19e-03	8.48e-06	Moderately soluble	-5.20	3.15e-03	6.38e-06	Moderately soluble	High	No	Yes	No	No	No	No	Yes	-6.91
158	C=C1[C@@H](O)[C@]2([H])/C=C/C[C@H](C)C[C@@](C)(OCC)/C=C/[C@@H](O)[C@@]23[C@@]([C@H](CC4=CC=CC=C4)NC3=O)([H])[C@@H]1C	18-Ethoxycytochalasin J							Phomopsis	Phomopsis		CCO[C@@]1(C)/C=C/[C@@H](O)[C@]23C(=O)N[C@H]([C@@H]3[C@@H](C(=C)[C@H]([C@@H]2/C=C/C[C@@H](C1)C)O)C)Cc1ccccc1	C30H41NO4	479.65	35	6	0.57	4	4	3	144.31	78.79	3.80	3.38	3.83	3.22	3.21	3.39	-4.89	6.37e-03	1.29e-05	Moderately soluble	-5.07	4.19e-03	8.48e-06	Moderately soluble	-5.20	3.15e-03	6.38e-06	Moderately soluble	High	No	Yes	No	No	No	No	Yes	-6.91
159	C=C1C([C@]2([H])/C=C/C[C@H](C)C[C@](O)(C)/C=C/[C@@H](OC(C)=O)[C@@]23[C@@]([C@H](CC4=CC=CC=C4)NC3=O)([H])[C@@H]1C)=O	7-Oxocytochalasin H							Phomopsis	Phomopsis		CC(=O)O[C@@H]1/C=C/[C@](C)(O)C[C@H](C/C=C/[C@@H]2[C@]31C(=O)N[C@H]([C@@H]3[C@H](C)C(=C)C2=O)Cc1ccccc1)C	C30H37NO5	491.62	36	6	0.50	4	5	2	143.55	92.70	3.50	4.06	3.57	3.15	3.80	3.61	-5.31	2.43e-03	4.95e-06	Moderately soluble	-5.71	9.56e-04	1.95e-06	Moderately soluble	-5.89	6.30e-04	1.28e-06	Moderately soluble	High	No	Yes	No	No	No	No	Yes	-6.42
160	C[C@@H]1C([C@]2([H])/C=C/C[C@H](C)C[C@](O)(C)/C=C/[C@@H](OC(C)=O)[C@@]23[C@@]([C@H](CC4=CC=CC=C4)NC3=O)([H])[C@@H]1C)=O	Cytochalasin H3							Phomopsis	Phomopsis		CC(=O)O[C@@H]1/C=C/[C@](C)(O)C[C@H](C/C=C/[C@@H]2[C@]31C(=O)N[C@H]([C@@H]3[C@H](C)[C@@H](C2=O)C)Cc1ccccc1)C	C30H39NO5	493.63	36	6	0.57	4	5	2	144.02	92.70	3.79	4.17	3.65	3.22	3.53	3.67	-5.39	2.03e-03	4.10e-06	Moderately soluble	-5.83	7.38e-04	1.50e-06	Moderately soluble	-5.66	1.08e-03	2.19e-06	Moderately soluble	High	No	Yes	No	No	No	No	Yes	-6.35
161	O=C1N[C@@H](CC2=CC=CC=C2)[C@]3([H])[C@H](C)C(COC(C)=O)=C[C@]4([H])/C=C/C[C@H](C)C[C@](O)(C)/C=C/[C@@H](OC(C)=O)[C@]431	Cytochalasin H4				No antimigratory effect (antimigratory abilities against MDA-MB-231)			Phomopsis	Phomopsis		CC(=O)O[C@@H]1/C=C/[C@](C)(O)C[C@H](C/C=C/[C@@H]2[C@]31C(=O)N[C@H]([C@@H]3[C@@H](C(=C2)COC(=O)C)C)Cc1ccccc1)C	C32H41NO6	535.67	39	6	0.53	7	6	2	154.25	101.93	4.03	3.83	3.93	3.54	3.73	3.81	-5.23	3.18e-03	5.94e-06	Moderately soluble	-5.67	1.16e-03	2.16e-06	Moderately soluble	-5.80	8.53e-04	1.59e-06	Moderately soluble	High	No	Yes	No	No	No	No	Yes	-6.85
162	C=C1[C@@H](O)[C@]2([H])/C=C/C[C@H](C)/C=C(C)\C=C\[C@@H](OC(C)=O)[C@@]23[C@@]([C@H](CC4=CC=CC=C4)NC3=O)([H])[C@@H]1C	21-Acetoxycytochalasin J2				Active with IC50 from 1.01–10.42 (antimigratory abilities against MDA-MB-231)			Phomopsis	Phomopsis		CC(=O)O[C@@H]1/C=C/C(=C\[C@H](C/C=C/[C@@H]2[C@]31C(=O)N[C@H]([C@@H]3[C@H](C)C(=C)[C@H]2O)Cc1ccccc1)C)/C	C30H37NO4	475.62	35	6	0.47	4	4	2	142.83	75.63	4.12	4.19	4.16	3.96	3.69	4.02	-5.29	2.43e-03	5.11e-06	Moderately soluble	-5.49	1.55e-03	3.26e-06	Moderately soluble	-5.55	1.33e-03	2.81e-06	Moderately soluble	High	Yes	Yes	No	No	No	No	Yes	-6.23
163	C[C@H]1[C@@H]([C@H](CC(C)C)NC2=O)[C@]2(C([C@H](O)[C@@]3([H])[C@]4([H])[C@]5(C)CC[C@@H](O5)C3=O)=O)[C@]4([H])C=C1C	Spicochalasin A	moderate cytotoxicity against HL-60 of 19.9						Spicaria	Other		CC(C[C@@H]1NC(=O)[C@@]23[C@H]1[C@H](C)C(=C[C@@H]3[C@@H]1[C@H]([C@H](C2=O)O)C(=O)[C@@H]2O[C@@]1(C)CC2)C)C	C24H33NO5	415.52	30	0	0.79	2	5	2	115.78	92.70	3.15	1.94	1.66	1.54	2.64	2.19	-3.51	1.29e-01	3.12e-04	Soluble	-3.51	1.28e-01	3.08e-04	Soluble	-3.65	9.22e-02	2.22e-04	Soluble	High	No	Yes	No	No	No	No	No	-7.46
164	C[C@H]1[C@@H]([C@H](CC(C)C)NC2=O)[C@]2(C([C@H](CC(C)=O)CC3=O)=O)[C@@H](/C=C(C)/CCC3)C=C1C	Aspochalasins N							Spicaria	Other		CC(C[C@@H]1NC(=O)[C@]23[C@H]1[C@H](C)C(=C[C@@H]2/C=C(\C)/CCCC(=O)C[C@H](C3=O)CC(=O)C)C)C	C27H39NO4	441.60	32	0	0.70	4	4	1	131.87	80.31	3.36	2.75	4.22	2.79	4.82	3.59	-4.05	3.97e-02	8.99e-05	Moderately soluble	-4.09	3.58e-02	8.10e-05	Moderately soluble	-5.67	9.40e-04	2.13e-06	Moderately soluble	High	No	Yes	No	No	No	No	Yes	-7.04
165	C[C@H]1[C@@H]([C@H](CC(C)C)NC2=O)[C@]2(C([C@H](CC(C)=O)CC3=O)=O)[C@@H](/C=C(C)/CC[C@H]3O)C=C1C	Aspochalasins O							Spicaria	Other		CC(C[C@@H]1NC(=O)[C@]23[C@H]1[C@H](C)C(=C[C@@H]2/C=C(\C)/CC[C@H](C(=O)C[C@H](C3=O)CC(=O)C)O)C)C	C27H39NO5	457.60	33	0	0.70	4	5	2	133.03	100.54	3.52	2.20	3.19	1.98	3.93	2.96	-3.80	7.27e-02	1.59e-04	Soluble	-3.95	5.19e-02	1.13e-04	Soluble	-4.85	6.45e-03	1.41e-05	Moderately soluble	High	No	Yes	No	No	No	No	Yes	-7.53
166	C[C@H]1[C@@H]([C@H](CC(C)C)NC2=O)[C@]2(C(CCC3=O)=O)[C@@H](/C=C(C)/CCC3)C=C1C	Aspochalasins Q							Spicaria	Other		CC(C[C@@H]1NC(=O)[C@@]23[C@H]1[C@H](C)C(=C[C@@H]3/C=C(\C)/CCCC(=O)CCC2=O)C)C	C24H35NO3	385.54	28	0	0.71	2	3	1	117.25	63.24	3.58	3.06	4.01	3.09	4.34	3.62	-4.03	3.63e-02	9.42e-05	Moderately soluble	-4.05	3.40e-02	8.82e-05	Moderately soluble	-5.21	2.37e-03	6.14e-06	Moderately soluble	High	Yes	Yes	No	No	No	No	Yes	-6.48
167	CC1=C[C@]2([H])/C=C/C[C@H](C)[C@@H](O)[C@@H](C)/C=C/[C@@H](O)[C@@]23[C@@]([C@H](CC4=CC=CC=C4)NC3=O)([H])[C@@H]1C	Brunnesins A	No cytotoxic effect against MCF-7, NCI-H187, Vero						Metarhizium	Metarhizium		O[C@@H]1[C@@H](C)C/C=C/[C@@H]2[C@]3([C@@H](/C=C/[C@@H]1C)O)C(=O)N[C@H]([C@@H]3[C@@H](C(=C2)C)C)Cc1ccccc1	C28H37NO3	435.60	32	6	0.54	2	3	3	133.57	69.56	3.76	4.21	3.67	3.74	2.93	3.66	-5.20	2.75e-03	6.31e-06	Moderately soluble	-5.38	1.81e-03	4.16e-06	Moderately soluble	-4.71	8.45e-03	1.94e-05	Moderately soluble	High	Yes	Yes	No	No	No	No	Yes	-5.97
168	C[C@H]([C@@H](C)[C@@]1([H])[C@H](CC2=CC=CC=C2)NC3=O)C([C@]([C@@]13[C@H](O)/C=C/[C@@H]4C)([H])/C=C/C[C@H](C)C4=O)=O	Brunnesins B	No cytotoxic effect against MCF-7, NCI-H187, Vero	Weak to mild anti- M. tuberculosis ability from 25 to 50					Metarhizium	Metarhizium		C[C@@H]1[C@@H](C)[C@H]2[C@H](Cc3ccccc3)NC(=O)[C@]32[C@H](C1=O)/C=C/C[C@H](C)C(=O)[C@H](/C=C/[C@H]3O)C	C28H35NO4	449.58	33	6	0.54	2	4	2	133.28	83.47	2.83	3.89	3.14	2.83	3.22	3.18	-5.08	3.73e-03	8.31e-06	Moderately soluble	-5.34	2.05e-03	4.56e-06	Moderately soluble	-5.30	2.25e-03	5.01e-06	Moderately soluble	High	No	Yes	No	No	No	No	Yes	-6.28
169	CC([C@@H](C)[C@@]1([H])[C@H](CC2=CC=CC=C2)NC3=O)=C[C@]([C@@]13[C@H](O)/C=C/[C@@H]4C)([H])/C=C/C[C@H](C)C4=O	Brunnesins C	No cytotoxic effect against MCF-7, NCI-H187, Vero						Metarhizium	Metarhizium		C[C@H]1/C=C/[C@@H](O)[C@]23C(=O)N[C@H]([C@@H]3[C@@H](C(=C[C@@H]2/C=C/C[C@@H](C1=O)C)C)C)Cc1ccccc1	C28H35NO3	433.58	32	6	0.50	2	3	2	132.61	66.40	3.25	4.23	3.88	3.66	3.51	3.71	-5.20	2.74e-03	6.31e-06	Moderately soluble	-5.34	2.00e-03	4.62e-06	Moderately soluble	-5.41	1.69e-03	3.91e-06	Moderately soluble	High	Yes	Yes	No	No	No	No	Yes	-5.94
170	CC([C@@H](C)[C@@]1([H])[C@H](CC2=CC=CC=C2)NC3=O)=C[C@]([C@@]13[C@H](O)/C=C/[C@]4(O)C)([H])/C=C/C[C@H](C)C4=O	Brunnesins D	Cytotoxicity 16.8, 3.71 and 2.09 against MCF-7, NCI-H187, Vero, respectively	Weak to mild anti- M. tuberculosis ability from 25 to 50					Metarhizium	Metarhizium		C[C@H]1/C=C/[C@@H](O)[C@]23C(=O)N[C@H]([C@@H]3[C@@H](C(=C[C@@H]2/C=C/C[C@@H](C1=O)C)C)C)Cc1ccccc1	C28H35NO3	433.58	32	6	0.50	2	3	2	132.61	66.40	3.25	4.23	3.88	3.66	3.51	3.71	-5.20	2.74e-03	6.31e-06	Moderately soluble	-5.34	2.00e-03	4.62e-06	Moderately soluble	-5.41	1.69e-03	3.91e-06	Moderately soluble	High	Yes	Yes	No	No	No	No	Yes	-5.94
171	CC1=C(C)[C@]([C@H](CC2=CC=CC=C2)NC3=O)([H])[C@@]43[C@@]([C@@H]1O)([H])/C=C/C[C@H](C)[C@@H](O)[C@@H](C)/C=C/[C@H]4O	Brunnesins E	No cytotoxic effect against MCF-7, NCI-H187, Vero	Weak to mild anti- M. tuberculosis ability from 25 to 50					Metarhizium	Metarhizium		O[C@@H]1[C@@H](C)C/C=C/[C@@H]2[C@]3([C@@H](/C=C/[C@@H]1C)O)C(=O)N[C@H]([C@@H]3C(=C([C@H]2O)C)C)Cc1ccccc1	C28H37NO4	451.60	33	6	0.54	2	4	4	134.73	89.79	3.80	2.51	2.79	2.91	2.42	2.89	-4.22	2.70e-02	5.97e-05	Moderately soluble	-4.04	4.11e-02	9.09e-05	Moderately soluble	-4.34	2.06e-02	4.56e-05	Moderately soluble	High	No	Yes	No	No	No	No	Yes	-7.27
172	C=C1[C@@H](O)[C@]2([H])/C=C/C[C@H](C)[C@@H](O)[C@@H](C)/C=C/[C@@H](O)[C@@]23[C@@]([C@H](CC4=CC=CC=C4)NC3=O)([H])[C@@H]1C	Brunnesins F	Cytotoxicity of 4.03 against Vero	Weak to mild anti- M. tuberculosis ability from 25 to 50					Metarhizium	Metarhizium		O[C@@H]1[C@@H](C)C/C=C/[C@@H]2[C@]3([C@@H](/C=C/[C@@H]1C)O)C(=O)N[C@H]([C@@H]3[C@@H](C(=C)[C@H]2O)C)Cc1ccccc1	C28H37NO4	451.60	33	6	0.54	2	4	4	134.73	89.79	3.41	3.09	2.64	2.91	2.31	2.87	-4.59	1.16e-02	2.58e-05	Moderately soluble	-4.64	1.03e-02	2.27e-05	Moderately soluble	-4.14	3.28e-02	7.26e-05	Moderately soluble	High	No	Yes	No	No	No	No	Yes	-6.86
173	C=C([C@@H](C)[C@@]1([H])[C@H](CC2=CC=CC=C2)NC3=O)[C@@H](O)[C@]([C@@]13[C@H](O)/C=C/[C@@H]4C)([H])/C=C/C[C@H](C)C4=O	Brunnesins G	Cytotoxic ability against NCI-H187, Vero from 3.98 to 44.81	Weak to mild anti- M. tuberculosis ability from 25 to 50					Metarhizium	Metarhizium		C[C@H]1/C=C/[C@@H](O)[C@@]23C(=O)N[C@H]([C@@H]2[C@H](C)C(=C)[C@H]([C@@H]3/C=C/C[C@@H](C1=O)C)O)Cc1ccccc1	C28H35NO4	449.58	33	6	0.50	2	4	3	133.77	86.63	3.11	3.11	2.85	2.83	2.90	2.96	-4.59	1.16e-02	2.57e-05	Moderately soluble	-4.60	1.14e-02	2.53e-05	Moderately soluble	-4.83	6.57e-03	1.46e-05	Moderately soluble	High	No	Yes	No	No	No	No	Yes	-6.83
174	C=C([C@@H](C)[C@@]1([H])[C@H](CC2=CC=CC=C2)NC3=O)[C@@H](O)[C@]([C@@]13C(/C=C/[C@@H]4C)=O)([H])/C=C/C[C@H](C)C4=O	Brunnesins H							Metarhizium	Metarhizium		C=C1[C@@H](C)[C@H]2[C@H](Cc3ccccc3)NC(=O)[C@]32[C@H]([C@@H]1O)/C=C/C[C@H](C)C(=O)[C@H](/C=C/C3=O)C	C28H33NO4	447.57	33	6	0.46	2	4	2	132.81	83.47	2.66	3.64	3.06	2.76	3.49	3.12	-4.91	5.50e-03	1.23e-05	Moderately soluble	-5.08	3.71e-03	8.29e-06	Moderately soluble	-5.53	1.31e-03	2.94e-06	Moderately soluble	High	No	Yes	No	No	No	No	Yes	-6.45
175	O=C1N[C@@H](CC2=CC=CC=C2)[C@]3([H])[C@H](C)[C@](O)(C)[C@@H](O)[C@]([C@@]31[C@H](O)/C=C/[C@]4(O)C)([H])/C=C/C[C@H](C)C4=O	Brunnesins I	Cytotoxicity against NCI-H187 of 18.59						Metarhizium	Metarhizium		C[C@H]1C/C=C/[C@H]2[C@H](O)[C@](C)(O)[C@H]([C@@H]3[C@@]2([C@@H](/C=C/[C@@](C1=O)(C)O)O)C(=O)N[C@H]3Cc1ccccc1)C	C28H37NO6	483.60	35	6	0.57	2	6	5	136.64	127.09	2.34	1.71	1.16	1.30	1.63	1.63	-3.91	5.94e-02	1.23e-04	Soluble	-3.99	4.90e-02	1.01e-04	Soluble	-3.86	6.69e-02	1.38e-04	Soluble	High	No	Yes	No	No	No	No	Yes	-8.04
176	O=C1N[C@@H](CC2=CC=CC=C2)[C@]3([H])[C@H](C)[C@](C)(O)[C@@H](O)[C@]([C@@]31[C@H](O)/C=C/[C@]4(O)C)([H])/C=C/C[C@H](C)C4=O	Brunnesins J	No cytotoxic effect against MCF-7, NCI-H187, Vero						Metarhizium	Metarhizium		C[C@H]1C/C=C/[C@H]2[C@H](O)[C@@](C)(O)[C@H]([C@@H]3[C@@]2([C@@H](/C=C/[C@@](C1=O)(C)O)O)C(=O)N[C@H]3Cc1ccccc1)C	C28H37NO6	483.60	35	6	0.57	2	6	5	136.64	127.09	2.82	1.71	1.16	1.30	1.63	1.72	-3.91	5.94e-02	1.23e-04	Soluble	-3.99	4.90e-02	1.01e-04	Soluble	-3.86	6.69e-02	1.38e-04	Soluble	High	No	Yes	No	No	No	No	Yes	-8.04
177	O=C1N[C@@H](CC2=CC=CC=C2)[C@]3([H])[C@H](C)[C@](O)(C)[C@@H](O)[C@]([C@@]31[C@H](O)/C=C/[C@@H]4C)([H])/C=C/C[C@H](C)C4=O	Brunnesins K	No cytotoxic effect against MCF-7, NCI-H187, Vero						Metarhizium	Metarhizium		C[C@H]1/C=C/[C@@H](O)[C@@]23C(=O)N[C@H]([C@@H]2[C@H](C)[C@@]([C@H]([C@@H]3/C=C/C[C@@H](C1=O)C)O)(C)O)Cc1ccccc1	C28H37NO5	467.60	34	6	0.57	2	5	4	135.45	106.86	1.55	2.64	2.05	2.10	2.13	2.09	-4.40	1.86e-02	3.97e-05	Moderately soluble	-4.53	1.36e-02	2.92e-05	Moderately soluble	-4.23	2.75e-02	5.87e-05	Moderately soluble	High	No	Yes	No	No	No	No	Yes	-7.28
178	O=C1N[C@@H](CC2=CC=CC=C2)[C@]3([H])[C@H](C)[C@](C)(O)[C@@H](O)[C@]([C@@]31[C@H](O)/C=C/[C@@H]4C)([H])/C=C/C[C@H](C)C4=O	Brunnesins L	Cytotoxicity against NCI-H187 of 18.54						Metarhizium	Metarhizium		C[C@H]1/C=C/[C@@H](O)[C@@]23C(=O)N[C@H]([C@@H]2[C@H](C)[C@]([C@H]([C@@H]3/C=C/C[C@@H](C1=O)C)O)(C)O)Cc1ccccc1	C28H37NO5	467.60	34	6	0.57	2	5	4	135.45	106.86	2.47	2.64	2.05	2.10	2.13	2.28	-4.40	1.86e-02	3.97e-05	Moderately soluble	-4.53	1.36e-02	2.92e-05	Moderately soluble	-4.23	2.75e-02	5.87e-05	Moderately soluble	High	No	Yes	No	No	No	No	Yes	-7.28
179	O=C1N[C@@H](CC2=CC=CC=C2)[C@]3([H])[C@](O)(C)[C@H](C)[C@@H](O)[C@]([C@@]31[C@H](O)/C=C/[C@@H]4C)([H])/C=C/C[C@H](C)C4=O	Brunnesins M	Cytotoxic ability against NCI-H187, Vero from 3.98 to 44.81						Metarhizium	Metarhizium		C[C@H]1/C=C/[C@@H](O)[C@]23C(=O)N[C@H]([C@@H]3[C@@]([C@@H]([C@H]([C@@H]2/C=C/C[C@@H](C1=O)C)O)C)(C)O)Cc1ccccc1	C28H37NO5	467.60	34	6	0.57	2	5	4	135.45	106.86	2.40	2.64	2.05	2.10	2.13	2.26	-4.40	1.86e-02	3.97e-05	Moderately soluble	-4.53	1.36e-02	2.92e-05	Moderately soluble	-4.23	2.75e-02	5.87e-05	Moderately soluble	High	No	Yes	No	No	No	No	Yes	-7.28
180	O=C1N[C@@H](CC2=CC=CC=C2)[C@]3([H])[C@](O)(C)[C@H](C)[C@@H](O)[C@]([C@@]31[C@H](O)/C=C/[C@]4(O)C)([H])/C=C/C[C@H](C)C4=O	Brunnesins N	Cytotoxic ability against NCI-H187, Vero from 3.98 to 44.81						Metarhizium	Metarhizium		O[C@H]1[C@@H]2/C=C/C[C@H](C)C(=O)[C@](/C=C/[C@H]([C@@]32C(=O)N[C@H]([C@@H]3[C@@]([C@@H]1C)(C)O)Cc1ccccc1)O)(C)O	C28H37NO6	483.60	35	6	0.57	2	6	5	136.64	127.09	2.42	1.71	1.16	1.30	1.63	1.65	-3.91	5.94e-02	1.23e-04	Soluble	-3.99	4.90e-02	1.01e-04	Soluble	-3.86	6.69e-02	1.38e-04	Soluble	High	No	Yes	No	No	No	No	Yes	-8.04
181	C[C@H]([C@@H](C)[C@@]1([H])[C@H](CC2=CC=CC=C2)NC3=O)C([C@]([C@@]13[C@H](O)/C=C/[C@]4(O)C)([H])/C=C/C[C@H](C)C4=O)=O	6,7-Dihydro-7-oxo-deacetylcytochalasin C	No cytotoxic effect against MCF-7, NCI-H187, Vero; selective cytotoxicity against HL-60, A549 SMMC-7721, MCF-7, SW480 from 4.17–37.18; moderate cytotoxic effect against HCT-15 between 50 and 100 μM;	Weak to mild anti- M. tuberculosis ability from 25 to 50					Metarhizium	Metarhizium		C[C@@H]1[C@@H](C)[C@H]2[C@H](Cc3ccccc3)NC(=O)[C@]32[C@H](C1=O)/C=C/C[C@H](C)C(=O)[C@](/C=C/[C@H]3O)(C)O	C28H35NO5	465.58	34	6	0.54	2	5	3	134.48	103.70	2.76	2.96	2.25	2.02	2.72	2.54	-4.59	1.20e-02	2.57e-05	Moderately soluble	-4.80	7.37e-03	1.58e-05	Moderately soluble	-4.93	5.50e-03	1.18e-05	Moderately soluble	High	No	Yes	No	No	No	No	Yes	-7.04
182	C=C([C@@H](C)[C@@]1([H])[C@H](CC2=CC=CC=C2)NC3=O)[C@@H](O)[C@]([C@@]13[C@H](O)/C=C/[C@]4(O)C)([H])/C=C/C[C@H](C)C4=O	Zygosporin D	Cytotoxicity of 0.637 against Vero; selective cytotoxicity against HL-60, A549 SMMC-7721, MCF-7, SW480 from 4.17–37.18; potent cytotoxicity against HCT-15 of 13.5;	Weak to mild anti- M. tuberculosis ability from 25 to 50					Metarhizium	Metarhizium		C=C1[C@@H](C)[C@H]2[C@H](Cc3ccccc3)NC(=O)[C@]32[C@H]([C@@H]1O)/C=C/C[C@H](C)C(=O)[C@](/C=C/[C@H]3O)(C)O	C28H35NO5	465.58	34	6	0.50	2	5	4	134.97	106.86	2.58	2.17	1.97	2.02	2.40	2.23	-4.09	3.76e-02	8.09e-05	Moderately soluble	-4.05	4.18e-02	8.97e-05	Moderately soluble	-4.46	1.60e-02	3.44e-05	Moderately soluble	High	No	Yes	No	No	No	No	Yes	-7.60
183	CC1=C(C)[C@]([C@H](CC2=CC=CC=C2)NC3=O)([H])[C@]3([C@H](O)/C=C/[C@@H]4C)[C@@]([C@@H]1O)([H])/C=C/C[C@H](C)C4=O	Deacetylcytochalasin C	No cytotoxic effect against MCF-7, NCI-H187, Vero; moderate cytotoxic effect against HCT-15 between 50 and 100 μM;	Weak to mild anti- M. tuberculosis ability from 25 to 50					Metarhizium	Metarhizium		C[C@H]1/C=C/[C@@H](O)[C@]23C(=O)N[C@H]([C@@H]3C(=C([C@H]([C@@H]2/C=C/C[C@@H](C1=O)C)O)C)C)Cc1ccccc1	C28H35NO4	449.58	33	6	0.50	2	4	3	133.77	86.63	3.06	2.54	2.99	2.83	3.01	2.89	-4.23	2.65e-02	5.89e-05	Moderately soluble	-4.01	4.43e-02	9.86e-05	Moderately soluble	-5.04	4.13e-03	9.18e-06	Moderately soluble	High	No	Yes	No	No	No	No	Yes	-7.24
184	CC1=C(C)[C@]([C@H](CC2=CC=CC=C2)NC3=O)([H])[C@]3([C@H](O)/C=C/[C@]4(O)C)[C@@]([C@@H]1O)([H])/C=C/C[C@H](C)C4=O	18-Deshydroxyl-deacetylcytochalasin C	No cytotoxic effect against MCF-7, NCI-H187, Vero	Weak to mild anti- M. tuberculosis ability from 25 to 50					Metarhizium	Metarhizium		CC1=C(C)[C@H]2[C@H](Cc3ccccc3)NC(=O)[C@]32[C@H]([C@@H]1O)/C=C/C[C@H](C)C(=O)[C@](/C=C/[C@H]3O)(C)O	C28H35NO5	465.58	34	6	0.50	2	5	4	134.97	106.86	2.84	1.60	2.11	2.02	2.51	2.22	-3.73	8.61e-02	1.85e-04	Soluble	-3.46	1.63e-01	3.50e-04	Soluble	-4.67	1.01e-02	2.16e-05	Moderately soluble	High	No	Yes	No	No	No	No	Yes	-8.00
185	CC1=C[C@H]2[C@@]3(OC(/C=C/[C@@H](O)[C@@H](O)CC/C(C)=C/2)=O)[C@@]([C@H](CC(C)C)NC3=O)([H])[C@@H]1C	Aspochalasins I	No cytotoxicity against Hela						Trichoderma	Trichoderma		CC(C[C@@H]1NC(=O)[C@@]23[C@H]1[C@H](C)C(=C[C@@H]3/C=C(\C)/CC[C@@H]([C@@H](/C=C/C(=O)O2)O)O)C)C	C24H35NO5	417.54	30	0	0.67	2	5	3	120.28	95.86	3.54	2.49	2.28	2.26	2.05	2.52	-3.87	5.69e-02	1.36e-04	Soluble	-4.15	2.97e-02	7.11e-05	Moderately soluble	-2.96	4.60e-01	1.10e-03	Soluble	High	No	Yes	No	No	No	No	Yes	-7.08
186	CC1=C[C@H]2[C@@]3(OC(/C=C/[C@@H](O)CCC/C(C)=C/2)=O)[C@@]([C@H](CC(C)C)NC3=O)([H])[C@@H]1C	Aspochalasins J	Weak cytotoxic effect of 27.8 against Hela						Trichoderma	Trichoderma		CC(C[C@@H]1NC(=O)[C@@]23[C@H]1[C@H](C)C(=C[C@@H]3/C=C(\C)/CCC[C@@H](/C=C/C(=O)O2)O)C)C	C24H35NO4	401.54	29	0	0.67	2	4	2	119.12	75.63	3.39	3.46	3.31	3.07	2.94	3.24	-4.38	1.68e-02	4.19e-05	Moderately soluble	-4.73	7.48e-03	1.86e-05	Moderately soluble	-3.78	6.71e-02	1.67e-04	Soluble	High	Yes	Yes	No	No	No	No	Yes	-6.29
187	CC1=C[C@H]2[C@@]3(OC(/C=C/[C@H](O)CCC/C(C)=C/2)=O)[C@@]([C@H](C(C)C)NC3=O)([H])[C@@H]1C	Trichalasins A							Trichoderma	Trichoderma		CC(C[C@@H]1NC(=O)[C@@]23[C@H]1[C@H](C)C(=C[C@@H]3/C=C(\C)/CCC[C@@H](/C=C/C(=O)O2)O)C)C	C24H35NO4	401.54	29	0	0.67	2	4	2	119.12	75.63	3.39	3.46	3.31	3.07	2.94	3.24	-4.38	1.68e-02	4.19e-05	Moderately soluble	-4.73	7.48e-03	1.86e-05	Moderately soluble	-3.78	6.71e-02	1.67e-04	Soluble	High	Yes	Yes	No	No	No	No	Yes	-6.29
188	CC1=C[C@H]2[C@@]3(OC(/C=C/[C@H](O)CCC/C(C)=C/2)=O)[C@@]([C@H](CC(C)C)NC3=O)([H])[C@@H]1C	Trichalasins B							Trichoderma	Trichoderma		CC(C[C@@H]1NC(=O)[C@@]23[C@H]1[C@H](C)C(=C[C@@H]3/C=C(\C)/CCC[C@H](/C=C/C(=O)O2)O)C)C	C24H35NO4	401.54	29	0	0.67	2	4	2	119.12	75.63	3.52	3.46	3.31	3.07	2.94	3.26	-4.38	1.68e-02	4.19e-05	Moderately soluble	-4.73	7.48e-03	1.86e-05	Moderately soluble	-3.78	6.71e-02	1.67e-04	Soluble	High	Yes	Yes	No	No	No	No	Yes	-6.29
189	CC([C@]([C@H](CC(C)C)NC1=O)([H])[C@]1(OC(/C=C/[C@H](O)[C@H](O)CC/C(C)=C/2)=O)[C@@H]2[C@@H]3O)=C3C	Trichalasins C	No cytotoxicity with EC50 values of > 40 μM against Hela						Trichoderma	Trichoderma		CC(C[C@@H]1NC(=O)[C@@]23[C@H]1C(=C(C)[C@H]([C@@H]3/C=C(\C)/CC[C@H]([C@H](/C=C/C(=O)O2)O)O)O)C)C	C24H35NO6	433.54	31	0	0.67	2	6	4	121.44	116.09	3.17	0.79	1.39	1.46	1.56	1.67	-2.89	5.54e-01	1.28e-03	Soluble	-2.81	6.73e-01	1.55e-03	Soluble	-2.59	1.12e+00	2.59e-03	Soluble	High	No	Yes	No	No	No	No	No	-8.38
190	C[C@H]1[C@]([C@H](CC(C)C)NC2=O)([H])[C@]2(OC(CCC3=O)=O)[C@@H](/C=C(C)/CC[C@H]3O)C=C1C	Trichalasins D	No cytotoxicity with EC50 values of > 40 μM against Hela						Trichoderma	Trichoderma		CC(C[C@@H]1NC(=O)[C@@]23[C@H]1[C@H](C)C(=C[C@@H]3/C=C(\C)/CC[C@H](C(=O)CCC(=O)O2)O)C)C	C24H35NO5	417.54	30	0	0.71	2	5	2	119.79	92.70	3.36	2.49	2.71	2.26	3.05	2.77	-3.87	5.69e-02	1.36e-04	Soluble	-4.08	3.46e-02	8.28e-05	Moderately soluble	-4.12	3.17e-02	7.59e-05	Moderately soluble	High	No	Yes	No	No	No	No	Yes	-7.08
191	CC1=C(C2=C[C@@](O3)(C)C(C)[C@@H]([C@]3(N4)CC(C)C)[C@]25C4=O)[C@@](CCCC1)([H])CC5=O	Trichoderones A	No cytotoxicity against Hela						Trichoderma	Trichoderma		CC(C[C@]12NC(=O)[C@]34[C@H]2C([C@](O1)(C)C=C4C1=C(C)CCCC[C@@H]1CC3=O)C)C	C24H33NO3	383.52	28	0	0.75	2	3	1	113.98	55.40	0.00	3.31	3.92	3.58	4.61	3.09	-4.17	2.59e-02	6.74e-05	Moderately soluble	-4.15	2.72e-02	7.09e-05	Moderately soluble	-5.48	1.27e-03	3.32e-06	Moderately soluble	High	Yes	Yes	No	No	No	No	No	-6.29
192	O=C1[C@]23[C@@]([C@H](O)C(C)=C(C)[C@@]2([H])[C@H](CC(C)C)NC3=O)([H])[C@](C4(C)CC[C@H](O)[C@@]5([H])O4)([H])[C@]5([H])C1	Trichoderones B	No cytotoxicity against Hela						Trichoderma	Trichoderma		CC(C[C@@H]1NC(=O)[C@@]23[C@H]1C(=C(C)[C@H]([C@@H]3[C@@H]1[C@H](CC2=O)[C@@H]2OC1(C)CC[C@@H]2O)O)C)C	C24H35NO5	417.54	30	0	0.83	2	5	3	116.74	95.86	3.19	0.83	1.60	1.63	2.45	1.94	-2.82	6.32e-01	1.51e-03	Soluble	-2.43	1.57e+00	3.75e-03	Soluble	-3.41	1.64e-01	3.92e-04	Soluble	High	No	Yes	No	No	No	No	No	-8.26
193	O=C1[C@](C(C[C@@]2(CCCC3)[H])=O)([C@@]([H])([C@H](C)C(C)=O)[C@H](CC(C)C)N1)C4=C2[C@]3(C)OC4=O	Trichodermone	No cytotoxicity against Hela						Trichoderma	Trichoderma		CC(C[C@@H]1NC(=O)[C@@]2([C@H]1[C@@H](C(=O)C)C)C(=O)C[C@H]1C3=C2C(=O)O[C@]3(C)CCCC1)C	C24H33NO5	415.52	30	0	0.75	4	5	1	116.93	89.54	2.92	2.43	2.75	2.26	4.31	2.93	-3.68	8.62e-02	2.07e-04	Soluble	-3.95	4.63e-02	1.11e-04	Soluble	-5.05	3.73e-03	8.97e-06	Moderately soluble	High	No	Yes	No	No	No	No	No	-7.11
194	CC([C@]([C@H](CC(C)C)NC1=O)([H])[C@]1(OC(/C=C/[C@H](O)[C@H](O)CC/C(C)=C/2)=O)[C@@H]2[C@@H]3OO)=C3C	Trichalasins E							Trichoderma	Trichoderma		OO[C@@H]1C(=C(C)[C@@H]2[C@]3([C@H]1/C=C(\C)/CC[C@@H](O)[C@H](/C=C/C(=O)O3)O)C(=O)N[C@H]2CC(C)C)C	C24H35NO7	449.54	32	0	0.67	3	7	4	122.94	125.32	3.13	0.84	1.89	1.49	1.10	1.69	-2.96	4.95e-01	1.10e-03	Soluble	-3.05	3.96e-01	8.82e-04	Soluble	-2.31	2.19e+00	4.88e-03	Soluble	High	No	Yes	No	No	No	No	No	-8.45
195	C[C@H]1[C@]([C@H](CC(C)C)NC2=O)([H])[C@]2(OC(C[C@@H](O)[C@H](O)CCC/C(C)=C/3)=O)[C@@H]3C=C1C	Trichalasins F							Trichoderma	Trichoderma		CC(C[C@@H]1NC(=O)[C@@]23[C@H]1[C@H](C)C(=C[C@@H]3/C=C(\C)/CCC[C@H]([C@@H](CC(=O)O2)O)O)C)C	C24H37NO5	419.55	30	0	0.75	2	5	3	120.76	95.86	3.25	2.48	2.50	2.35	2.46	2.61	-3.87	5.64e-02	1.34e-04	Soluble	-4.14	3.06e-02	7.28e-05	Moderately soluble	-3.42	1.58e-01	3.77e-04	Soluble	High	No	Yes	No	No	No	No	Yes	-7.10
196	C[C@H]1[C@]([C@H](CC(C)C)NC2=O)([H])[C@]2(C(CC(O)C(OC)C(O)CC/C(C)=C/3)=O)[C@@H]3C=C1C	Aspochalasin K							Trichoderma	Trichoderma		COC1C(O)CC/C(=C/[C@@H]2[C@]3(C(=O)CC1O)C(=O)N[C@H]([C@@H]3[C@@H](C(=C2)C)C)CC(C)C)/C	C25H39NO5	433.58	31	0	0.76	3	5	3	125.26	95.86	3.48	2.07	2.40	1.74	2.52	2.44	-3.63	1.01e-01	2.32e-04	Soluble	-3.71	8.41e-02	1.94e-04	Soluble	-3.57	1.18e-01	2.71e-04	Soluble	High	No	Yes	No	No	No	No	Yes	-7.48
197	C[C@H]1[C@]([C@H](CC(C)C)NC2=O)([H])[C@]2(C(CC(OC)C(O)C(O)CC/C(C)=C/3)=O)[C@@H]3C=C1C	Trichalasin G	Moderate cytotocxicity against MDA-MB-231 60.6						Trichoderma	Trichoderma		COC1CC(=O)[C@]23C(=O)N[C@H]([C@@H]3[C@@H](C(=C[C@@H]2/C=C(/CCC(C1O)O)\C)C)C)CC(C)C	C25H39NO5	433.58	31	0	0.76	3	5	3	125.26	95.86	3.03	2.07	2.40	1.74	2.52	2.35	-3.63	1.01e-01	2.32e-04	Soluble	-3.71	8.41e-02	1.94e-04	Soluble	-3.57	1.18e-01	2.71e-04	Soluble	High	No	Yes	No	No	No	No	Yes	-7.48
198	O=C1[C@]23[C@@](C=C(C)[C@@H](C)[C@@]2([H])[C@H](CC(C)C)NC3=O)([H])[C@](C4(C)CC[C@H](O)[C@@]5([H])O4)([H])[C@]5([H])C1	Trichalasins H							Trichoderma	Trichoderma		CC(C[C@@H]1NC(=O)[C@@]23[C@H]1[C@H](C)C(=C[C@@H]3[C@@H]1[C@H](CC2=O)[C@@H]2OC1(C)CC[C@@H]2O)C)C	C24H35NO4	401.54	29	0	0.83	2	4	2	115.58	75.63	3.24	2.35	2.48	2.44	2.94	2.69	-3.68	8.43e-02	2.10e-04	Soluble	-3.58	1.06e-01	2.64e-04	Soluble	-3.78	6.71e-02	1.67e-04	Soluble	High	Yes	Yes	No	No	No	No	No	-7.08
199	CC1C(C(CC2=CNC3=C2C=CC=C3)NC4=O)C4(C(/C=C/C(C(O)/C(C)=C/C(C)C/C=C/5)=O)=O)C5C(O6)C16C	Chaetoglobosin A		Weak to potent antimicrobial effect against Bacillus subtilis, Salmonella typhimurium, and Staphylococcus aureus between 4 and 512					Calonectria	Other		CC1C/C=C/C2C3OC3(C)C(C3C2(C(=O)NC3Cc2c[nH]c3c2cccc3)C(=O)/C=C/C(=O)C(/C(=C/1)/C)O)C	C32H36N2O5	528.64	39	9	0.47	2	5	3	153.29	111.79	3.43	3.71	3.45	2.03	4.03	3.33	-5.49	1.70e-03	3.21e-06	Moderately soluble	-5.75	9.43e-04	1.78e-06	Moderately soluble	-6.36	2.31e-04	4.37e-07	Poorly soluble	High	No	Yes	No	No	No	No	Yes	-6.89
200	CC1C(C(CC2=CNC3=C2C=CC=C3)NC4=O)C4(C(/C=C/C(C(OC(C)=O)/C(C)=C/C(C)C/C=C/5)=O)=O)C5C(O6)C16C	19-O-Acetylchaetoglobosin A							Calonectria	Other		CC(=O)OC1C(=O)/C=C/C(=O)C23C(=O)NC(C3C(C3(C(C2/C=C/CC(/C=C/1\C)C)O3)C)C)Cc1c[nH]c2c1cccc2	C34H38N2O6	570.68	42	9	0.47	4	6	2	163.03	117.86	3.65	4.28	4.02	2.36	4.54	3.77	-5.97	6.13e-04	1.07e-06	Moderately soluble	-6.47	1.94e-04	3.41e-07	Poorly soluble	-6.96	6.26e-05	1.10e-07	Poorly soluble	High	No	Yes	No	No	No	No	Yes	-6.74
201	C[C@@H](C/C=C/[C@@H]1[C@]2(C3=O)[C@@]([C@H](C)N3)([H])C(C)=C(C)[C@H]1O)[C@@H]4[C@](O4)(C)[C@@H](O)CC2=O	Alachalasin A		Displayed no antimicrobial effect	Displayed no antimicrobial effect				Stachybotrys	Other		CC1=C(C)[C@@H]2[C@]3([C@H]([C@@H]1O)/C=C/C[C@H](C)[C@@H]1[C@]([C@H](CC3=O)O)(O1)C)C(=O)N[C@H]2C	C22H31NO5	389.49	28	0	0.73	0	5	3	108.77	99.16	2.78	0.21	1.13	1.11	1.79	1.40	-2.39	1.60e+00	4.10e-03	Soluble	-1.85	5.48e+00	1.41e-02	Very soluble	-2.75	6.96e-01	1.79e-03	Soluble	High	No	Yes	No	No	No	No	No	-8.53
202	C[C@@H](C/C=C/[C@@H]1[C@]2(C3=O)[C@@]([C@H](C)N3)([H])C(C)=C(C)[C@H]1O)[C@@H]4[C@](O4)(C)[C@@H](OC)CC2=O	Alachalasin B		Displayed no antimicrobial effect	Displayed no antimicrobial effect				Stachybotrys	Other		CO[C@H]1CC(=O)[C@]23C(=O)N[C@H]([C@@H]3C(=C([C@H]([C@@H]2/C=C/C[C@@H]([C@@H]2[C@@]1(C)O2)C)O)C)C)C	C23H33NO5	403.51	29	0	0.74	1	5	2	113.50	88.16	3.19	0.75	1.78	1.32	2.33	1.88	-2.75	7.20e-01	1.79e-03	Soluble	-2.18	2.66e+00	6.59e-03	Soluble	-3.44	1.47e-01	3.64e-04	Soluble	High	No	Yes	No	No	No	No	No	-8.23
203	C[C@@H](C/C=C/[C@@H]1[C@]2(C3=O)[C@@]([C@H](C)N3)([H])C(C)=C(C)[C@H]1O)[C@@H]4[C@](O4)(C)C([H])CC2=O	Alachalasin C		Displayed no antimicrobial effect	Displayed no antimicrobial effect				Stachybotrys	Other		CC1=C(C)[C@@H]2[C@]3([C@H]([C@@H]1O)/C=C/C[C@H](C)[C@@H]1[C@](CCC3=O)(O1)C)C(=O)N[C@H]2C	C22H31NO4	373.49	27	0	0.73	0	4	2	107.61	78.93	3.11	1.19	2.16	1.92	2.68	2.21	-2.91	4.64e-01	1.24e-03	Soluble	-2.44	1.34e+00	3.60e-03	Soluble	-3.57	1.01e-01	2.72e-04	Soluble	High	No	Yes	No	No	No	No	No	-7.73
204	C[C@@H](C/C=C/[C@@H]([C@@H]1O)[C@]2(C3=O)[C@@]([C@H](C)N3)([H])[C@H](C)C1=C)[C@@H]4[C@](O4)(C)[C@@H](O)CC2=O	Alachalasin D		antibacterial					Stachybotrys	Other		C=C1[C@@H](O)[C@@H]2/C=C/C[C@H](C)[C@@H]3[C@]([C@H](CC(=O)[C@]42[C@@H]([C@@H]1C)[C@H](C)NC4=O)O)(O3)C	C22H31NO5	389.49	28	0	0.73	0	5	3	108.77	99.16	2.60	0.79	0.98	1.11	1.68	1.43	-2.75	6.89e-01	1.77e-03	Soluble	-2.45	1.37e+00	3.52e-03	Soluble	-2.55	1.11e+00	2.84e-03	Soluble	High	No	Yes	No	No	No	No	No	-8.11
205	C[C@@H](C/C=C/[C@@H]([C@@H]1O)[C@]2(C3=O)[C@@]([C@H](C)N3)([H])[C@H](C)C1=C)[C@@H]4[C@](O4)(C)[C@@H](OC)CC2=O	Alachalasin E		Displayed no antimicrobial effect	Displayed no antimicrobial effect				Stachybotrys	Other		CO[C@H]1CC(=O)[C@]23C(=O)N[C@H]([C@@H]3[C@@H](C(=C)[C@H]([C@@H]2/C=C/C[C@@H]([C@@H]2[C@@]1(C)O2)C)O)C)C	C23H33NO5	403.51	29	0	0.74	1	5	2	113.50	88.16	2.97	1.32	1.64	1.32	2.22	1.90	-3.11	3.15e-01	7.81e-04	Soluble	-2.77	6.82e-01	1.69e-03	Soluble	-3.24	2.34e-01	5.79e-04	Soluble	High	No	Yes	No	No	No	No	No	-7.82
206	C[C@@H](C/C=C/[C@@H]1[C@]2(C3=O)[C@@]([C@H](C)N3)([H])C(C)=C(C)[C@H]1O)[C@@H]4[C@](O4)(C)[C@@H](N5C(N=CN=C6N)=C6N=C5)CC2=O	Alachalasin F		Displayed no antimicrobial effect	Displayed no antimicrobial effect				Stachybotrys	Other		C[C@H]1C/C=C/[C@H]2[C@H](O)C(=C([C@@H]3[C@@]2(C(=O)C[C@@H]([C@]2([C@@H]1O2)C)n1cnc2c1ncnc2N)C(=O)N[C@H]3C)C)C	C27H34N6O4	506.60	37	9	0.59	1	7	3	141.67	148.55	3.02	0.28	1.74	0.63	0.90	1.31	-3.27	2.71e-01	5.35e-04	Soluble	-2.96	5.54e-01	1.09e-03	Soluble	-4.31	2.49e-02	4.92e-05	Moderately soluble	Low	No	Yes	No	No	No	Yes	No	-9.19
207	C[C@@H](C/C=C/[C@@H]1[C@]2(C3=O)[C@@]([C@H](C)N3)([H])[C@H](C)[C@]4(C)[C@H]1O4)[C@@H]5[C@](O5)(C)[C@@H](N6C(N=CN=C7N)=C7N=C6)CC2=O	Alachalasin G		antibacterial					Stachybotrys	Other		C[C@H]1C/C=C/[C@H]2[C@@H]3O[C@]3(C)[C@H]([C@@H]3[C@@]2(C(=O)C[C@@H]([C@]2([C@@H]1O2)C)n1cnc2c1ncnc2N)C(=O)N[C@H]3C)C	C27H34N6O4	506.60	37	9	0.67	1	7	2	140.00	140.85	3.06	1.38	1.83	0.71	1.24	1.65	-3.96	5.50e-02	1.09e-04	Soluble	-3.94	5.80e-02	1.15e-04	Soluble	-4.40	2.00e-02	3.94e-05	Moderately soluble	High	No	Yes	No	No	No	Yes	No	-8.41
208	C[C@]12[C@@H](O2)[C@H](/C=C/C[C@H](C)/C=C(C)/C(C(C3=CC=C4N3)=O)=O)[C@@]54[C@]([H])([C@H](CC6=CNC7=CC=CC=C67)NC5=O)[C@@H]1C	Penochalasin A	Mild cytotoxic effect against KB of 34.0						Chaetomium	Chaetomium		C[C@H]1C/C=C/[C@H]2[C@@H]3O[C@]3(C)[C@H]([C@@H]3[C@]2(C(=O)N[C@H]3Cc2c[nH]c3c2cccc3)c2[nH]c(C(=O)C(=O)/C(=C/1)/C)cc2)C	C33H35N3O4	537.65	40	14	0.42	2	4	3	157.54	107.35	3.26	4.61	4.43	2.11	5.44	3.97	-6.20	3.36e-04	6.24e-07	Poorly soluble	-6.59	1.38e-04	2.57e-07	Poorly soluble	-8.51	1.65e-06	3.07e-09	Poorly soluble	High	No	Yes	Yes	No	Yes	No	No	-6.31
209	C[C@]12[C@@H](O2)[C@H](/C=C/C[C@H](C)/C=C(C)/C(C(CCC3=O)=O)=O)[C@@]43[C@]([H])([C@H](CC5=CNC6=CC=CC=C56)NC4=O)[C@@H]1C	Chaetoglobosins C	Mild cytotoxic effect against KB of 40.0; cytotoxicity against the cholangiocarcinoma tumour from 3.41to 86.95, and the human breast cancer from 2.54 to 21.29; no cytotoxic against U937, H1975, K562, MOLT-4, BGC823, MCF-7, Hela, A549, Huh-7, HL60	No antibacterial activity against methicillin-resistant Staphylococcus aureus ATCC 43300; ESBL-producing Escherichia coli ATCC 35218; Enterococcus faecalis ATCC 29212; NDM-1-producing Klebsiella pneumoniae ATCC BAA2146; and Pseudomonas aeruginosa ATCC 15542; no anti-tuberculosis activity; Weak to potent antimicrobial effect against Bacillus subtilis, Salmonella typhimurium, and Staphylococcus aur…	Phytotoxic effect towards radish seedlings				Chaetomium	Chaetomium		C[C@H]1C/C=C/[C@H]2[C@@H]3O[C@]3(C)[C@H]([C@@H]3[C@]2(C(=O)N[C@H]3Cc2c[nH]c3c2cccc3)C(=O)CCC(=O)C(=O)/C(=C/1)/C)C	C32H36N2O5	528.64	39	9	0.50	2	5	2	152.80	108.63	3.09	3.71	3.88	2.03	5.03	3.55	-5.49	1.70e-03	3.21e-06	Moderately soluble	-5.68	1.10e-03	2.08e-06	Moderately soluble	-7.52	1.59e-05	3.00e-08	Poorly soluble	High	No	Yes	No	No	No	No	Yes	-6.89
210	CC1=C(C)[C@@]([H])([C@H](CC2=CNC3=CC=CC=C23)NC4=O)[C@]45[C@@H](/C=C/C[C@H](C)/C=C(C)/C([C@@H](O)CCC5=O)=O)[C@@H]1O	Chaetoglobosins E	Mild cytotoxic effect against KB of 52.0; No cytotoxic activity against HCT116; highest cytotoxic effect B16F10 and LNCaP of 2.78 and 0.63; antitumour effect against U937, H1975, K562, MOLT-4, BGC823, MCF-7, Hela, A549, Huh-7, HL60 from 1.4 to 9.2; cytotoxicity against A549, HCC827, SW620, and MDA-MB-231 of 2.0, 1.7, 2.9, and 9.9, respectively; strong cytotoxic effect against two drug-resistant H…	Weak to potent antimicrobial effect against Bacillus subtilis, Salmonella typhimurium, and Staphylococcus aureus between 4 and 512; No antibacterial activity against S. aureus, B. subtilis, and E. faecalis	Phytotoxic effect towards radish seedlings	No anti-inflammatory abilities			Chaetomium	Chaetomium		C[C@H]1C/C=C/[C@H]2[C@H](O)C(=C([C@@H]3[C@]2(C(=O)N[C@H]3Cc2c[nH]c3c2cccc3)C(=O)CC[C@@H](C(=O)/C(=C/1)/C)O)C)C	C32H38N2O5	530.65	39	9	0.47	2	5	4	155.44	119.49	3.37	2.86	3.58	2.03	4.10	3.19	-4.97	5.68e-03	1.07e-05	Moderately soluble	-5.03	4.97e-03	9.37e-06	Moderately soluble	-6.73	9.88e-05	1.86e-07	Poorly soluble	High	No	Yes	No	No	No	No	Yes	-7.51
211	C[C@]12[C@@H](O2)[C@H](/C=C/C[C@H](C)/C=C(C)/C([C@@H](O)CCC3=O)=O)[C@@]43[C@]([H])([C@H](CC5=CNC6=CC=CC=C56)NC4=O)[C@@H]1C	Chaetoglobosins F	Mild cytotoxic effect against KB of 48.0; cytotoxicity against the cholangiocarcinoma tumour from 3.41to 86.95, and the human breast cancer from 2.54 to 21.29; mild to strong cytotoxic effect of 17.8; no cytotoxic against U937, H1975, K562, MOLT-4, BGC823, MCF-7, Hela, A549, Huh-7, HL60; no anti-tuberculosis activity		Phytotoxic effect towards radish seedlings				Chaetomium	Chaetomium		C[C@H]1C/C=C/[C@H]2[C@@H]3O[C@]3(C)[C@H]([C@@H]3[C@]2(C(=O)N[C@H]3Cc2c[nH]c3c2cccc3)C(=O)CC[C@@H](C(=O)/C(=C/1)/C)O)C	C32H38N2O5	530.65	39	9	0.53	2	5	3	153.76	111.79	3.30	3.96	3.68	2.11	4.44	3.50	-5.66	1.15e-03	2.17e-06	Moderately soluble	-6.01	5.21e-04	9.82e-07	Poorly soluble	-6.83	7.92e-05	1.49e-07	Poorly soluble	High	No	Yes	No	No	No	No	Yes	-6.73
212	C[C@]12[C@@H](O2)[C@H](C=CC[C@H](C)[C@]3([H])[C@@](C(C(O)=C3C)=O)([H])CC4=O)[C@]45[C@]([H])([C@H](CC6=CNC7=CC=CC=C67)NC5=O)[C@@H]1C	Chaetoglobosin U	Strong cytotoxic effect against KB of 16.0	Weak to potent antimicrobial effect against Bacillus subtilis, Salmonella typhimurium, and Staphylococcus aureus between 4 and 512					Chaetomium	Chaetomium		C[C@H]1CC=C[C@H]2[C@@H]3O[C@]3(C)[C@H]([C@@H]3[C@@]2(C(=O)C[C@@H]2[C@@H]1C(=C(C2=O)O)C)C(=O)N[C@H]3Cc1c[nH]c2c1cccc2)C	C32H36N2O5	528.64	39	9	0.53	2	5	3	152.06	111.79	2.36	3.62	4.06	2.11	4.42	3.31	-5.44	1.93e-03	3.66e-06	Moderately soluble	-5.66	1.17e-03	2.21e-06	Moderately soluble	-6.81	8.19e-05	1.55e-07	Poorly soluble	High	No	Yes	No	No	No	No	No	-6.95
213	C[C@H]1[C@@]([H])([C@H](CC2=CNC3=CC=CC=C23)NC4=O)[C@]4(C5=O)[C@@H](/C=C/C[C@H](C)[C@]6([H])[C@@](C(C(O)=C6C)=O)([H])C5)[C@H](O)C1=C	Cytoglobosins A	No cytotoxic against KB, A549, P388						Chaetomium	Chaetomium		C=C1[C@@H](C)[C@H]2[C@@H](NC(=O)[C@]32[C@H]([C@@H]1O)/C=C/C[C@@H]([C@@H]1[C@@H](CC3=O)C(=O)C(=C1C)O)C)Cc1c[nH]c2c1cccc2	C32H36N2O5	528.64	39	9	0.47	2	5	4	153.74	119.49	3.25	3.09	3.82	2.03	3.98	3.23	-5.10	4.17e-03	7.89e-06	Moderately soluble	-5.27	2.86e-03	5.41e-06	Moderately soluble	-6.51	1.63e-04	3.08e-07	Poorly soluble	High	No	Yes	No	No	No	No	Yes	-7.33
214	C[C@H]1[C@@]([H])([C@H](CC2=CNC3=CC=CC=C23)NC4=O)[C@]45[C@@H](/C=C/C[C@H](C)/C=C(C)/[C@@H](O)[C@@H](O)/C=C/C5=O)[C@H](O)C1=C	Cytoglobosins B	No cytotoxic against KB, A549, P388						Chaetomium	Chaetomium		C[C@H]1C/C=C/[C@H]2[C@H](O)C(=C)[C@H]([C@@H]3[C@]2(C(=O)N[C@H]3Cc2c[nH]c3c2cccc3)C(=O)/C=C/[C@@H]([C@@H](/C(=C/1)/C)O)O)C	C32H38N2O5	530.65	39	9	0.44	2	5	5	155.93	122.65	3.22	2.64	3.00	2.03	3.00	2.78	-4.83	7.81e-03	1.47e-05	Moderately soluble	-4.87	7.22e-03	1.36e-05	Moderately soluble	-5.37	2.28e-03	4.31e-06	Moderately soluble	High	No	No	No	No	No	No	Yes	-7.66
215	CC1=C(C)[C@@H](O)[C@H](/C=C/C[C@H](C)/C=C(C)/[C@@H](O)[C@@H](O)/C=C/C2=O)[C@@]32[C@@]1([C@H](CC4=CNC5=CC=CC=C45)NC3=O)[H]	Cytoglobosins C	Cytotoxicity against A549 of 2.26	Weak to potent antimicrobial effect against Bacillus subtilis, Salmonella typhimurium, and Staphylococcus aureus between 4 and 512					Chaetomium	Chaetomium		C[C@H]1C/C=C/[C@H]2[C@H](O)C(=C([C@@H]3[C@]2(C(=O)N[C@H]3Cc2c[nH]c3c2cccc3)C(=O)/C=C/[C@@H]([C@@H](/C(=C/1)/C)O)O)C)C	C32H38N2O5	530.65	39	9	0.44	2	5	5	155.93	122.65	3.36	2.07	3.15	2.03	3.11	2.74	-4.47	1.79e-02	3.37e-05	Moderately soluble	-4.27	2.82e-02	5.31e-05	Moderately soluble	-5.57	1.44e-03	2.71e-06	Moderately soluble	High	No	No	No	No	No	No	Yes	-8.07
216	C[C@H]1[C@@]([H])([C@H](CC2=CNC3=CC=CC=C23)NC4=O)[C@]45[C@@H](/C=C/C[C@H](C)/C=C(C)/[C@@H](O)[C@@H](O)/C=C/C5=O)C=C1C	Cytoglobosins D	Cytotoxicity against A549 of 2.55						Chaetomium	Chaetomium		C[C@H]1C/C=C/[C@H]2C=C(C)[C@H]([C@@H]3[C@]2(C(=O)N[C@H]3Cc2c[nH]c3c2cccc3)C(=O)/C=C/[C@@H]([C@@H](/C(=C/1)/C)O)O)C	C32H38N2O4	514.66	38	9	0.44	2	4	4	154.77	102.42	3.41	3.76	4.03	2.83	3.61	3.53	-5.44	1.86e-03	3.61e-06	Moderately soluble	-5.60	1.28e-03	2.49e-06	Moderately soluble	-5.94	5.88e-04	1.14e-06	Moderately soluble	High	No	Yes	No	No	No	No	Yes	-6.77
217	C[C@H]1[C@@]([H])([C@H](CC2=CNC3=CC=CC=C23)NC4=O)[C@]45[C@@H](/C=C/C[C@H](C)/C=C(C)/C(C(CCC5=O)=O)=O)C=C1CO	Cytoglobosins E	No cytotoxic against KB, A549, P388						Chaetomium	Chaetomium		OCC1=C[C@@H]2/C=C/C[C@H](C)/C=C(/C(=O)C(=O)CCC(=O)[C@]32[C@@H]([C@@H]1C)[C@@H](NC3=O)Cc1c[nH]c2c1cccc2)\C	C32H36N2O5	528.64	39	9	0.44	3	5	3	154.48	116.33	2.31	3.05	3.65	1.96	4.58	3.11	-5.01	5.14e-03	9.73e-06	Moderately soluble	-5.16	3.66e-03	6.93e-06	Moderately soluble	-7.22	3.15e-05	5.96e-08	Poorly soluble	High	No	Yes	No	No	No	No	Yes	-7.36
218	C[C@H]1[C@@]([H])([C@H](CC2=CNC3=CC=CC=C23)NC4=O)[C@]45[C@@H](/C=C/C[C@H](C)/C=C(C)/[C@@H](O)C(CCC5=O)=O)[C@H](O)C1=C	Cytoglobosins F							Chaetomium	Chaetomium		C[C@H]1C/C=C/[C@H]2[C@H](O)C(=C)[C@H]([C@@H]3[C@]2(C(=O)N[C@H]3Cc2c[nH]c3c2cccc3)C(=O)CCC(=O)[C@@H](/C(=C/1)/C)O)C	C32H38N2O5	530.65	39	9	0.47	2	5	4	155.44	119.49	2.39	2.84	3.44	2.03	3.99	2.94	-4.96	5.85e-03	1.10e-05	Moderately soluble	-5.01	5.21e-03	9.83e-06	Moderately soluble	-6.53	1.57e-04	2.96e-07	Poorly soluble	High	No	Yes	No	No	No	No	Yes	-7.52
219	C[C@H]1[C@@]([H])([C@H](CC2=CNC3=CC=CC=C23)NC4=O)[C@]45[C@@H](/C=C/C[C@H](C)/C=C(C)/[C@@H](O)[C@@H](O)CCC5=O)[C@H](O)C1=C	Cytoglobosins G	No cytotoxic against KB, A549, P388						Chaetomium	Chaetomium		C[C@H]1C/C=C/[C@H]2[C@H](O)C(=C)[C@H]([C@@H]3[C@]2(C(=O)N[C@H]3Cc2c[nH]c3c2cccc3)C(=O)CC[C@@H]([C@@H](/C(=C/1)/C)O)O)C	C32H40N2O5	532.67	39	9	0.50	2	5	5	156.40	122.65	3.04	2.64	3.23	2.11	3.41	2.88	-4.84	7.62e-03	1.43e-05	Moderately soluble	-4.87	7.25e-03	1.36e-05	Moderately soluble	-5.83	7.86e-04	1.48e-06	Moderately soluble	High	No	Yes	No	No	No	No	Yes	-7.67
220	C[C@H]1[C@@]([H])([C@H](CC2=CNC3=CC=CC=C23)NC4=O)[C@]45[C@@H](/C=C/C[C@H](C)/C=C(C)/C([C@@H](O)CCC5=O)=O)[C@H](O)C1=C	Chaetoglobosin Fex	Mild to strong cytotoxic effect of 4.43; selective cytotoxic effect against MOLT-4, Huh7, U937, MCF-7 from 2.9 to 7.5	No anti-tuberculosis activity	Phytotoxic effect towards radish seedlings	Anti-inflammatory ability inhibition of ERK1/2, JNK1/2, p38 phosphorylations, NF-kB			Chaetomium	Chaetomium		C[C@H]1C/C=C/[C@H]2[C@H](O)C(=C)[C@H]([C@@H]3[C@]2(C(=O)N[C@H]3Cc2c[nH]c3c2cccc3)C(=O)CC[C@@H](C(=O)/C(=C/1)/C)O)C	C32H38N2O5	530.65	39	9	0.47	2	5	4	155.44	119.49	2.98	3.43	3.44	2.03	3.99	3.17	-5.33	2.48e-03	4.68e-06	Moderately soluble	-5.62	1.27e-03	2.40e-06	Moderately soluble	-6.53	1.57e-04	2.96e-07	Poorly soluble	High	No	Yes	No	No	No	No	Yes	-7.10
221	C[C@H]1[C@@]([H])([C@H](CC2=CNC3=CC=CC=C23)NC4=O)[C@]45[C@@H](/C=C/C[C@H](C)/C=C(C)/C(C(CCC5=O)=O)=O)[C@H](O)C1=C	Isochaetoglobosin D	Cytotoxicity against the cholangiocarcinoma tumour from 3.41to 86.95, and the human breast cancer from 2.54 to 21.29; weak selective cytotoxicity against SW480, HT1080, SW1990, MM231, HL60, U87MG, HEP3B, A549between 19.5 and 34.72;no cytotoxic against U937, H1975, K562, MOLT-4, BGC823, MCF-7, Hela, A549, Huh-7, HL60; mild cytotoxic effect towards MDA-MB-231 of 11.43	No anti-tuberculosis activity; No antibacterial activity against S. aureus, B. subtilis, and E. faecalis					Chaetomium	Chaetomium		C[C@H]1C/C=C/[C@H]2[C@H](O)C(=C)[C@H]([C@@H]3[C@]2(C(=O)N[C@H]3Cc2c[nH]c3c2cccc3)C(=O)CCC(=O)C(=O)/C(=C/1)/C)C	C32H36N2O5	528.64	39	9	0.44	2	5	3	154.48	116.33	2.88	3.18	3.64	1.96	4.58	3.25	-5.16	3.66e-03	6.92e-06	Moderately soluble	-5.29	2.69e-03	5.08e-06	Moderately soluble	-7.22	3.15e-05	5.96e-08	Poorly soluble	High	No	Yes	No	No	No	No	Yes	-7.27
222	CC1=C(C)[C@@H](O)[C@H](/C=C/C[C@H](C)/C=C(C)/[C@@H](O)C(/C=C/C2=O)=O)[C@@]32[C@@]1([C@H](CC4=CNC5=CC=CC=C45)NC3=O)[H]	Chaetoglobosins B	Cytotoxicity against the cholangiocarcinoma tumour from 3.41to 86.95, and the human breast cancer from 2.54 to 21.29; no cytotoxic against U937, H1975, K562, MOLT-4, BGC823, MCF-7, Hela, A549, Huh-7, HL60	No anti-tuberculosis activity					Chaetomium	Chaetomium		C[C@H]1C/C=C/[C@H]2[C@H](O)C(=C([C@@H]3[C@]2(C(=O)N[C@H]3Cc2c[nH]c3c2cccc3)C(=O)/C=C/C(=O)[C@@H](/C(=C/1)/C)O)C)C	C32H36N2O5	528.64	39	9	0.41	2	5	4	154.97	119.49	2.14	2.60	3.36	1.96	3.70	2.75	-4.79	8.49e-03	1.61e-05	Moderately soluble	-4.76	9.22e-03	1.74e-05	Moderately soluble	-6.26	2.88e-04	5.45e-07	Poorly soluble	High	No	No	No	No	No	No	Yes	-7.68
223	CC1[C@@]([H])([C@H](CC2=CNC3=CC=CC=C23)NC4=O)[C@]45[C@@H](/C=C/C[C@H](C)/C=C(C)/[C@@H](O)C(/C=C/C5=O)=O)[C@H](O)C1=C	Chaetoglobosins D	Cytotoxicity against the cholangiocarcinoma tumour from 3.41to 86.95, and the human breast cancer from 2.54 to 21.29; no cytotoxic against U937, H1975, K562, MOLT-4, BGC823, MCF-7, Hela, A549, Huh-7, HL60	No anti-tuberculosis activity					Chaetomium	Chaetomium		C[C@H]1C/C=C/[C@H]2[C@H](O)C(=C)C([C@@H]3[C@]2(C(=O)N[C@H]3Cc2c[nH]c3c2cccc3)C(=O)/C=C/C(=O)[C@@H](/C(=C/1)/C)O)C	C32H36N2O5	528.64	39	9	0.41	2	5	4	154.97	119.49	2.62	3.18	3.21	1.96	3.59	2.91	-5.16	3.66e-03	6.92e-06	Moderately soluble	-5.36	2.31e-03	4.36e-06	Moderately soluble	-6.06	4.58e-04	8.67e-07	Poorly soluble	High	No	No	No	No	No	No	Yes	-7.27
224	CC1=C(C)[C@@H](O)[C@H](/C=C/C[C@H](C)/C=C(C)/C(C(/C=C/C2=O)=O)=O)[C@@]32[C@@]1([C@H](CC4=CNC5=CC=CC=C45)NC3=O)[H]	Chaetoglobosins G	Cytotoxicity against the cholangiocarcinoma tumour from 3.41to 86.95, and the human breast cancer from 2.54 to 21.29; no cytotoxic against U937, H1975, K562, MOLT-4, BGC823, MCF-7, Hela, A549, Huh-7, HL60	No anti-tuberculosis activity	Antifungal activity against F. graminearum, A. solani, and A. alternate, with MIC values of 50, 25, and 25 μg/mL, respectively				Chaetomium	Chaetomium		C[C@H]1C/C=C/[C@H]2[C@H](O)C(=C([C@@H]3[C@]2(C(=O)N[C@H]3Cc2c[nH]c3c2cccc3)C(=O)/C=C/C(=O)C(=O)/C(=C/1)/C)C)C	C32H34N2O5	526.62	39	9	0.38	2	5	3	154.01	116.33	2.62	3.18	3.56	1.96	3.59	2.91	-5.16	3.66e-03	6.92e-06	Moderately soluble	-5.36	2.31e-03	4.36e-06	Moderately soluble	-6.06	4.58e-04	8.67e-07	Poorly soluble	High	No	No	No	No	No	No	Yes	-7.27
225	CC1=C(C)[C@@H](O)[C@H](/C=C/C[C@H](C)/C=C(C)/CC/C=C/C2=O)[C@@]32[C@@]1([C@H](CC4=CNC5=CC=CC=C45)NC3=O)[H]	Chaetoglobosin V	Cytotoxicity against the cholangiocarcinoma tumour from 3.41to 86.95, and the human breast cancer from 2.54 to 21.29; weak selective cytotoxicity against SW480, HT1080, SW1990, MM231, HL60, U87MG, HEP3B, A549between 19.5 and 34.72	No antibacterial activity against K. pneumonia, E. coli, and S. aureus					Chaetomium	Chaetomium		C[C@H]1C/C=C/[C@H]2[C@H](O)C(=C([C@@H]3[C@]2(C(=O)N[C@H]3Cc2c[nH]c3c2cccc3)C(=O)/C=C/CC/C(=C/1)/C)C)C	C32H38N2O3	498.66	37	9	0.44	2	3	3	153.61	82.19	2.62	3.18	5.21	1.96	3.59	2.91	-5.16	3.66e-03	6.92e-06	Moderately soluble	-5.36	2.31e-03	4.36e-06	Moderately soluble	-6.06	4.58e-04	8.67e-07	Poorly soluble	High	No	No	No	No	No	No	Yes	-7.27
226	C[C@H]1[C@@]([H])([C@H](CC2=CNC3=CC=CC=C23)NC4=O)[C@]45[C@@H](/C=C/C[C@H](C)/C=C(C)/CC(/C=C/C5=O)=O)[C@H](O6)[C@@]16C	Prochaetoglobosin III	Cytotoxicity against the cholangiocarcinoma tumour from 3.41to 86.95, and the human breast cancer from 2.54 to 21.29						Chaetomium	Chaetomium		O=C1/C=C/C(=O)[C@@]23C(=O)N[C@H]([C@@H]2[C@H](C)[C@@]2([C@H]([C@@H]3/C=C/C[C@@H](/C=C(/C1)\C)C)O2)C)Cc1c[nH]c2c1cccc2	C32H36N2O4	512.64	38	9	0.47	2	4	2	152.13	91.56	3.26	4.26	4.48	2.83	4.92	3.95	-5.75	9.21e-04	1.80e-06	Moderately soluble	-5.89	6.54e-04	1.27e-06	Moderately soluble	-7.18	3.35e-05	6.53e-08	Poorly soluble	High	No	Yes	No	No	Yes	No	Yes	-6.40
227	CC1=C(C)[C@@H](O)[C@H](/C=C/C[C@H](C)/C=C(C)/CC(/C=C/C2=O)=O)[C@@]32[C@@]1([C@H](CC4=CNC5=CC=CC=C45)NC3=O)[H]	Prochaetoglobosin IIIed	Cytotoxicity against the cholangiocarcinoma tumour from 3.41to 86.95, and the human breast cancer from 2.54 to 21.29						Chaetomium	Chaetomium		C[C@H]1C/C=C/[C@H]2[C@H](O)C(=C([C@@H]3[C@]2(C(=O)N[C@H]3Cc2c[nH]c3c2cccc3)C(=O)/C=C/C(=O)C/C(=C/1)/C)C)C	C32H36N2O4	512.64	38	9	0.41	2	4	3	153.81	99.26	3.35	3.15	4.38	2.76	4.59	3.65	-5.05	4.61e-03	8.99e-06	Moderately soluble	-4.90	6.39e-03	1.25e-05	Moderately soluble	-7.09	4.19e-05	8.17e-08	Poorly soluble	High	No	Yes	No	No	Yes	No	Yes	-7.19
228	O=C1[C@@]([C@@]2(O)[C@@H](C)C[C@@H](C)C[C@]3(C)O2)([H])[C@@]3([H])C4[C@]([C@@]5([H])[C@H](C)C(C)=C4)1C(NC([C@H]5C6=CC=CC=C6)=O)=O	Chaetoconvosins A	No cytotoxic against SMMC-7721, A549, HEPG2, PC-3, and A375						Chaetomium	Chaetomium	Unpredicted 6/6/5/5/7 pentacyclic ring system	C[C@@H]1C[C@H](C)[C@]2(O[C@](C1)(C)[C@H]1[C@@H]2C(=O)[C@@]23C1C=C(C)[C@H]([C@H]3[C@@H](C(=O)NC2=O)c1ccccc1)C)O	C29H35NO5	477.59	35	6	0.62	1	5	2	135.50	92.70	3.31	3.22	3.22	3.11	3.54	3.28	-4.89	6.15e-03	1.29e-05	Moderately soluble	-4.84	6.91e-03	1.45e-05	Moderately soluble	-5.92	5.70e-04	1.19e-06	Moderately soluble	High	No	Yes	No	No	No	No	No	-6.93
229	O=C1[C@@]([C@@]2(O)[C@@H](C)C[C@@H](C)C[C@]3(C)O2)([H])[C@@]3([H])[C@@]4(O)[C@]([C@@]5([H])[C@H](C)C(C)=C4)1C(N(C)C([C@H]5C6=CC=CC=C6)=O)=O	Chaetoconvosins B	Moderate cytotoxic effect against SMMC-7721, A549, HEPG2, PC-3, and A375 of 43.0, 26.12, 44.60, 49.74 and 47.93 μM, respectively		Inhibition effect towards root elongation				Chaetomium	Chaetomium	Unpredicted 6/6/5/5/7 pentacyclic ring system	C[C@@H]1C[C@H](C)[C@]2(O[C@](C1)(C)[C@H]1[C@@H]2C(=O)[C@]23[C@@]1(O)C=C(C)[C@H]([C@H]2[C@H](c1ccccc1)C(=O)N(C3=O)C)C)O	C30H37NO6	507.62	37	6	0.63	1	6	2	141.60	104.14	3.61	2.33	2.68	2.50	3.00	2.82	-4.51	1.57e-02	3.10e-05	Moderately soluble	-4.16	3.54e-02	6.98e-05	Moderately soluble	-5.21	3.16e-03	6.22e-06	Moderately soluble	High	No	Yes	No	No	No	No	No	-7.74
230	CC1=C(C)[C@@H](O)[C@H](/C=C/C[C@H](C)[C@@]2([H])C(C)=C(O)C3=O)[C@@]4(C(C[C@@]32[H])=O)[C@@]1([C@H](CC5=CNC6=CC=CC=C56)NC4=O)[H]	Chaetoglobosin Vb	No cytotoxic against U937, H1975, K562, MOLT-4, BGC823, MCF-7, Hela, A549, Huh-7, HL60	No antibacterial activity against E. coli, S. aureus, B. cereusi, B. subtilis and P. aeruginosa; no anti-tuberculosis activity; Weak to potent antimicrobial effect against Bacillus subtilis, Salmonella typhimurium, and Staphylococcus aureus between 4 and 512	No antifungal activity against F. graminearum, A. solani, and A. alternate	No anti-inflammatory abilities			Chaetomium	Chaetomium		C[C@H]1C/C=C/[C@H]2[C@H](O)C(=C([C@@H]3[C@@]2(C(=O)C[C@@H]2[C@@H]1C(=C(C2=O)O)C)C(=O)N[C@H]3Cc1c[nH]c2c1cccc2)C)C	C32H36N2O5	528.64	39	9	0.47	2	5	4	153.74	119.49	2.66	2.51	3.96	2.03	4.09	3.05	-4.74	9.67e-03	1.83e-05	Moderately soluble	-4.67	1.14e-02	2.16e-05	Moderately soluble	-6.71	1.02e-04	1.93e-07	Poorly soluble	High	No	Yes	No	No	No	No	Yes	-7.74
231	C[C@H]1[C@@]([H])([C@H](CC2=CNC3=CC=CC=C23)NC4=O)[C@]45[C@@H](/C=C/C[C@H](C)/C=C(C)/[C@@H](O)[C@@H](O)/C=C/C5=O)[C@H]6[C@]1(C)O6	20-Dihydrochaetoglobosin A	Mild to strong cytotoxic effect of 8.44						Chaetomium	Chaetomium	Epoxide ring as well as the double bond at C-6(12)	C[C@H]1C/C=C/[C@H]2[C@@H]3O[C@]3(C)[C@H]([C@@H]3[C@]2(C(=O)N[C@H]3Cc2c[nH]c3c2cccc3)C(=O)/C=C/[C@@H]([C@@H](/C(=C/1)/C)O)O)C	C32H38N2O5	530.65	39	9	0.50	2	5	4	154.25	114.95	3.59	3.17	3.24	2.11	3.44	3.11	-5.17	3.62e-03	6.82e-06	Moderately soluble	-5.25	2.95e-03	5.56e-06	Moderately soluble	-5.66	1.15e-03	2.17e-06	Moderately soluble	High	No	Yes	No	No	No	No	No	-7.29
232	C[C@H]1[C@@]([H])([C@H](CC2=CNC3=CC=CC=C23)NC4=O)[C@]4(C5=CC=CN5)[C@@H](/C=C/CC(C)/C=C(C)/C=O)[C@H]6[C@]1(C)O6	Armochaetoglobins A							Chaetomium	Chaetomium		O=C/C(=C/C(C/C=C/[C@H]1[C@@H]2O[C@]2(C)[C@H]([C@@H]2[C@]1(C(=O)N[C@H]2Cc1c[nH]c2c1cccc2)c1ccc[nH]1)C)C)/C	C32H37N3O3	511.65	38	14	0.44	8	3	3	154.27	90.28	3.37	4.46	4.86	2.80	6.96	4.49	-5.57	1.39e-03	2.71e-06	Moderately soluble	-6.08	4.30e-04	8.41e-07	Poorly soluble	-8.07	4.34e-06	8.49e-09	Poorly soluble	High	No	Yes	Yes	No	Yes	No	Yes	-6.25
233	C[C@H]1[C@@]([H])([C@H](CC2=CNC3=CC=CC=C23)NC4=O)[C@]4(C(CCCO)=O)[C@@H](/C=C/CC(C)/C=C(CO)\C)[C@H]5[C@]1(C)O5	Armochaetoglobins B	Cytotoxic effect against HL-60, SMMC-7721, and A549 between 16.47-30.88						Chaetomium	Chaetomium		OCCCC(=O)[C@]12C(=O)N[C@H]([C@@H]2[C@@H]([C@@]2([C@H]([C@@H]1/C=C/CC(/C=C(/CO)\C)C)O2)C)C)Cc1c[nH]c2c1cccc2	C32H42N2O5	534.69	39	9	0.56	11	5	4	156.84	114.95	3.68	3.62	3.72	2.18	6.29	3.90	-4.88	7.04e-03	1.32e-05	Moderately soluble	-5.72	1.02e-03	1.90e-06	Moderately soluble	-6.79	8.75e-05	1.64e-07	Poorly soluble	High	No	Yes	No	No	No	No	Yes	-6.99
234	C[C@H]1[C@@]([H])([C@H](CC2=CNC3=CC=CC=C23)NC4=O)[C@]4(C(CCCO)=O)[C@@H](/C=C/CC(C)/C=C(C=O)\C)[C@H]5[C@]1(C)O5	Armochaetoglobins C	Cytotoxic effect against HL-60, SMMC-7721, and A549 between 10.62-16.32						Chaetomium	Chaetomium		OCCCC(=O)[C@]12C(=O)N[C@H]([C@@H]2[C@@H]([C@@]2([C@H]([C@@H]1/C=C/CC(/C=C(/C=O)\C)C)O2)C)C)Cc1c[nH]c2c1cccc2	C32H40N2O5	532.67	39	9	0.53	11	5	3	155.88	111.79	3.45	3.50	3.92	2.11	6.59	3.91	-4.79	8.59e-03	1.61e-05	Moderately soluble	-5.53	1.57e-03	2.95e-06	Moderately soluble	-6.91	6.60e-05	1.24e-07	Poorly soluble	High	No	Yes	No	No	Yes	No	Yes	-7.06
235	C[C@H]1[C@@]([H])([C@H](CC2=CNC3=CC=CC=C23)NC4=O)[C@]4(C(CCC(O)=O)=O)[C@@H](/C=C/CC(C)/C=C(C=O)\C)[C@H]5[C@]1(C)O5	Armochaetoglobins D	Cytotoxic effect against SMMC-7721 of 24.99						Chaetomium	Chaetomium		O=C/C(=C/C(C/C=C/[C@H]1[C@@H]2O[C@]2(C)[C@H]([C@@H]2[C@@]1(C(=O)CCC(=O)O)C(=O)N[C@H]2Cc1c[nH]c2c1cccc2)C)C)/C	C32H38N2O6	546.65	40	9	0.50	11	6	3	156.49	128.86	2.88	3.32	4.02	2.06	6.15	3.69	-4.76	9.47e-03	1.73e-05	Moderately soluble	-5.70	1.08e-03	1.98e-06	Moderately soluble	-6.43	2.01e-04	3.68e-07	Poorly soluble	Low	No	Yes	No	No	Yes	No	Yes	-7.28
236	C[C@H]1[C@@]([H])([C@H](CC2=CNC3=CC=CC=C23)NC4=O)[C@]4(C(CCC(OC)=O)=O)[C@@H](/C=C/CC(C)/C=C(C=O)\C)[C@H]5[C@]1(C)O5	Armochaetoglobins E	Cytotoxic effect against HL-60, SMMC-7721, A549, MCF-7, and SW480 between 10.84-38.17						Chaetomium	Chaetomium		COC(=O)CCC(=O)[C@]12C(=O)N[C@H]([C@@H]2[C@@H]([C@@]2([C@H]([C@@H]1/C=C/CC(/C=C(/C=O)\C)C)O2)C)C)Cc1c[nH]c2c1cccc2	C33H40N2O6	560.68	41	9	0.52	12	6	2	160.81	117.86	3.95	3.65	4.10	2.24	6.72	4.13	-4.99	5.79e-03	1.03e-05	Moderately soluble	-5.81	8.61e-04	1.54e-06	Moderately soluble	-7.12	4.26e-05	7.60e-08	Poorly soluble	High	No	Yes	No	No	Yes	No	Yes	-7.13
237	C[C@H]1[C@@]([H])([C@H](CC2=CNC3=CC=CC=C23)NC4=O)[C@]4(C(CC5)=O)[C@@H](/C=C/C[C@H](C)/C=C(C)/CC5=O)C=C1CO	Armochaetoglobins F	No cytotoxic against HL-60, SMMC-7721, A549, MCF-7, and SW480						Chaetomium	Chaetomium		OCC1=C[C@@H]2/C=C/C[C@H](C)/C=C(/CC(=O)CCC(=O)[C@]32[C@@H]([C@@H]1C)[C@@H](NC3=O)Cc1c[nH]c2c1cccc2)\C	C32H38N2O4	514.66	38	9	0.47	3	4	3	154.28	99.26	3.30	3.26	4.47	2.83	4.89	3.75	-5.06	4.46e-03	8.67e-06	Moderately soluble	-5.02	4.93e-03	9.58e-06	Moderately soluble	-7.35	2.29e-05	4.45e-08	Poorly soluble	High	No	Yes	No	No	No	No	Yes	-7.12
238	C[C@H]1[C@@]([H])([C@H](CC2=CNC3=CC=CC=C23)NC4=O)[C@]4(C(CC[C@@H]5O)=O)[C@@H](/C=C/C[C@H](C)/C=C(C)/C5=O)C=C1C	Armochaetoglobins G	Cytotoxic effect against HL-60, SMMC-7721, A549, MCF-7, and SW480 between 12.58-20.55; no cytotoxic against U937, H1975, K562, MOLT-4, BGC823, MCF-7, Hela, A549, Huh-7, HL60	No anti-tuberculosis activity					Chaetomium	Chaetomium		C[C@H]1C/C=C/[C@H]2C=C(C)[C@H]([C@@H]3[C@]2(C(=O)N[C@H]3Cc2c[nH]c3c2cccc3)C(=O)CC[C@@H](C(=O)/C(=C/1)/C)O)C	C32H38N2O4	514.66	38	9	0.47	2	4	3	154.28	99.26	3.17	4.55	4.46	2.83	4.60	3.92	-5.94	5.90e-04	1.15e-06	Moderately soluble	-6.36	2.26e-04	4.39e-07	Poorly soluble	-7.10	4.05e-05	7.87e-08	Poorly soluble	High	No	Yes	No	No	Yes	No	Yes	-6.21
239	C[C@H]1[C@@]([H])([C@H](CC2=CNC3=CC=CC=C23)NC4=O)[C@]4(C(/C=C/5)=O)[C@@H](/C=C/C[C@H](C)/C=C(C)/[C@@H](O)C5=O)C=C1CO	Armochaetoglobins H	Cytotoxic effect against HL-60, SMMC-7721, A549, MCF-7, and SW480 between 3.31-9.8						Chaetomium	Chaetomium		OCC1=C[C@@H]2/C=C/C[C@H](C)/C=C(/[C@H](C(=O)/C=C/C(=O)[C@]32[C@@H]([C@@H]1C)[C@@H](NC3=O)Cc1c[nH]c2c1cccc2)O)\C	C32H36N2O5	528.64	39	9	0.41	3	5	4	154.97	119.49	3.14	3.05	3.21	1.96	3.59	2.99	-5.01	5.14e-03	9.73e-06	Moderately soluble	-5.23	3.15e-03	5.95e-06	Moderately soluble	-6.06	4.58e-04	8.67e-07	Poorly soluble	High	No	No	No	No	No	No	Yes	-7.36
240	C[C@H]1[C@@]([H])([C@H](CC2=CNC3=CC=CC=C23)NC4=O)[C@]45[C@@H](/C=C/C[C@H](C)/C=C(C)/[C@@H](O)[C@@H](O)CCC5=O)C=C1C	Armochaetoglobins I	No cytotoxic against HL-60, SMMC-7721, A549, MCF-7, and SW480	Weak to potent antimicrobial effect against Bacillus subtilis, Salmonella typhimurium, and Staphylococcus aureus between 4 and 512					Chaetomium	Chaetomium		C[C@H]1C/C=C/[C@H]2C=C(C)[C@H]([C@@H]3[C@]2(C(=O)N[C@H]3Cc2c[nH]c3c2cccc3)C(=O)CC[C@@H]([C@@H](/C(=C/1)/C)O)O)C	C32H40N2O4	516.67	38	9	0.50	2	4	4	155.24	102.42	3.14	3.76	4.26	2.91	4.01	3.62	-5.46	1.81e-03	3.50e-06	Moderately soluble	-5.60	1.29e-03	2.49e-06	Moderately soluble	-6.41	2.02e-04	3.91e-07	Poorly soluble	High	No	Yes	No	No	No	No	Yes	-6.78
241	C[C@H]1[C@]2([H])[C@]3(C(CCC4=O)=O)[C@@H](/C=C/C[C@H](C)/C=C(C)/C4=O)[C@H](O)[C@@]1(C)O[C@@]2(CC5=CNC6=CC=CC=C56)NC3=O	Armochaetoglobins J	Cytotoxic effect against HL-60, SMMC-7721, A549, MCF-7, and SW480 between 17.43-35.28						Chaetomium	Chaetomium		C[C@H]1C/C=C/[C@H]2[C@H](O)[C@@]3(C)O[C@@]4([C@@H]([C@@]2(C(=O)CCC(=O)C(=O)/C(=C/1)/C)C(=O)N4)[C@@H]3C)Cc1c[nH]c2c1cccc2	C32H36N2O6	544.64	40	9	0.50	2	6	3	154.00	125.56	2.99	2.94	3.20	1.65	4.28	3.01	-5.10	4.29e-03	7.88e-06	Moderately soluble	-5.24	3.14e-03	5.77e-06	Moderately soluble	-7.15	3.87e-05	7.11e-08	Poorly soluble	High	No	Yes	No	No	No	No	Yes	-7.53
242	C[C@H]1[C@]2([H])[C@]3(C(CC[C@@H]4O)=O)[C@@H](/C=C/C[C@H](C)/C=C(C)/C4=O)[C@H](O)[C@@]1(C)O[C@@]2(CC5=CNC6=CC=CC=C56)NC3=O	Chaetoglobosin W							Chaetomium	Chaetomium		C[C@H]1C/C=C/[C@H]2[C@H](O)[C@@]3(C)O[C@@]4([C@@H]([C@@]2(C(=O)CC[C@@H](C(=O)/C(=C/1)/C)O)C(=O)N4)[C@@H]3C)Cc1c[nH]c2c1cccc2	C32H38N2O6	546.65	40	9	0.53	2	6	4	154.96	128.72	3.34	3.19	3.00	1.72	3.69	2.99	-5.27	2.91e-03	5.33e-06	Moderately soluble	-5.56	1.49e-03	2.73e-06	Moderately soluble	-6.45	1.94e-04	3.54e-07	Poorly soluble	High	No	Yes	No	No	No	No	Yes	-7.37
243	C[C@H]1[C@@]([H])([C@H](CC2=CNC3=CC=CC=C23)NC4=O)[C@]4(C(CCC5=O)=O)[C@@H](/C=C/C[C@H](C)/C=C(C)/C5=O)C=C1C	Isochaetoglobosin J							Chaetomium	Chaetomium	Unusual pyrrole-based	C[C@H]1C/C=C/[C@H]2C=C(C)[C@H]([C@@H]3[C@]2(C(=O)N[C@H]3Cc2c[nH]c3c2cccc3)C(=O)CCC(=O)C(=O)/C(=C/1)/C)C	C32H36N2O4	512.64	38	9	0.44	2	4	2	153.32	96.10	3.55	4.30	4.67	2.76	5.19	4.10	-5.77	8.69e-04	1.70e-06	Moderately soluble	-6.03	4.77e-04	9.30e-07	Poorly soluble	-7.80	8.11e-06	1.58e-08	Poorly soluble	High	No	Yes	No	No	Yes	No	Yes	-6.37
244	C[C@H]1[C@@]([H])([C@H](CC2=CNC3=CC=CC=C23)NC4=O)[C@]4(C5=CC=C6N5)[C@@H](/C=C/C[C@H](C)/C=C(C)/C6=O)C=C1C	Armochaetoglobins K							Chaetomium	Chaetomium	Unusual pyrrole-based	C[C@H]1C/C=C/[C@H]2C=C(C)[C@H]([C@@H]3[C@]2(C(=O)N[C@H]3Cc2c[nH]c3c2cccc3)c2[nH]c(C(=O)/C(=C/1)/C)cc2)C	C32H35N3O2	493.64	37	14	0.38	2	2	3	153.05	77.75	3.55	4.30	5.65	2.76	5.19	4.10	-5.77	8.69e-04	1.70e-06	Moderately soluble	-6.03	4.77e-04	9.30e-07	Poorly soluble	-7.80	8.11e-06	1.58e-08	Poorly soluble	High	No	Yes	No	No	Yes	No	Yes	-6.37
245	C[C@H]1[C@@]([H])([C@H](CC2=CNC3=CC=CC=C23)NC4=O)[C@]4(C5=CC=C6N5)[C@@H](/C=C/C[C@H](C)/C=C(C)/C6=O)C=C1CO	Armochaetoglobins L					Strong anti-HIV effect of 0.48		Chaetomium	Chaetomium	Unusual pyrrole-based	C[C@H]1C/C=C/[C@H]2C=C(C)[C@H]([C@@H]3[C@]2(C(=O)N[C@H]3Cc2c[nH]c3c2cccc3)c2[nH]c(C(=O)/C(=C/1)/C)cc2)C	C32H35N3O2	493.64	37	14	0.38	2	2	3	153.05	77.75	3.55	4.30	5.65	2.76	5.19	4.10	-5.77	8.69e-04	1.70e-06	Moderately soluble	-6.03	4.77e-04	9.30e-07	Poorly soluble	-7.80	8.11e-06	1.58e-08	Poorly soluble	High	No	Yes	No	No	Yes	No	Yes	-6.37
246	C[C@H]1[C@@]([H])([C@]2(CC3=CNC4=CC=CC=C34)NC5=O)[C@]5(C6=CC=C7N6)[C@@H](/C=C/C[C@H](C)/C=C(C)/C7=O)[C@H](O)[C@]1(O2)C	Armochaetoglobins M					Strong anti-HIV effect of 0.55		Chaetomium	Chaetomium	Unusual pyrrole-based	C[C@H]1C/C=C/[C@H]2[C@H](O)[C@@]3(C)O[C@@]4([C@@H]([C@]2(C(=O)N4)c2[nH]c(C(=O)/C(=C/1)/C)cc2)[C@@H]3C)Cc1c[nH]c2c1cccc2	C32H35N3O4	525.64	39	14	0.44	2	4	4	153.73	107.21	3.04	4.29	4.18	2.00	4.76	3.65	-5.94	6.10e-04	1.16e-06	Moderately soluble	-6.25	2.93e-04	5.57e-07	Poorly soluble	-8.00	5.21e-06	9.91e-09	Poorly soluble	High	No	Yes	Yes	No	Yes	No	No	-6.46
247	CC1=C(C)[C@@H](O)[C@H](/C=C/C[C@H](C)C[C@@H](C)C2=O)[C@@]3(C4=CC=C2N4)[C@@]1([C@H](CC5=CNC6=CC=CC=C56)NC3=O)[H]	Armochaetoglobins N					Strong anti-HIV effect of 0.25		Chaetomium	Chaetomium	Unusual pyrrole-based	C[C@H]1C/C=C/[C@H]2[C@H](O)C(=C([C@@H]3[C@]2(C(=O)N[C@H]3Cc2c[nH]c3c2cccc3)c2[nH]c(C(=O)[C@@H](C1)C)cc2)C)C	C32H37N3O3	511.65	38	14	0.44	2	3	4	154.69	97.98	3.04	4.29	4.84	2.00	4.76	3.65	-5.94	6.10e-04	1.16e-06	Moderately soluble	-6.25	2.93e-04	5.57e-07	Poorly soluble	-8.00	5.21e-06	9.91e-09	Poorly soluble	High	No	Yes	Yes	No	Yes	No	No	-6.46
248	CC1=C(C)[C@@H](O)[C@H](/C=C/C[C@H](C)C[C@H](C)C2=O)[C@@]3(C4=CC=C2N4)[C@@]1([C@H](CC5=CNC6=CC=CC=C56)NC3=O)[H]	Armochaetoglobins O							Chaetomium	Chaetomium	Unusual pyrrole-based	C[C@H]1C/C=C/[C@H]2[C@H](O)C(=C([C@@H]3[C@]2(C(=O)N[C@H]3Cc2c[nH]c3c2cccc3)c2[nH]c(C(=O)[C@@H](C1)C)cc2)C)C	C32H37N3O3	511.65	38	14	0.44	2	3	4	154.69	97.98	3.04	4.29	4.84	2.00	4.76	3.65	-5.94	6.10e-04	1.16e-06	Moderately soluble	-6.25	2.93e-04	5.57e-07	Poorly soluble	-8.00	5.21e-06	9.91e-09	Poorly soluble	High	No	Yes	Yes	No	Yes	No	No	-6.46
249	C[C@H]1[C@@]([H])([C@H](CC2=CNC3=CC=CC=C23)NC4=O)[C@]4(C5=CC=C6N5)[C@@H](/C=C/C[C@H](C)C[C@@H](C)C6=O)[C@H]7[C@]1(C)O7	Armochaetoglobins P							Chaetomium	Chaetomium	Unusual pyrrole-based	C[C@H]1C/C=C/[C@H]2[C@@H]3O[C@]3(C)[C@H]([C@@H]3[C@]2(C(=O)N[C@H]3Cc2c[nH]c3c2cccc3)c2[nH]c(C(=O)[C@@H](C1)C)cc2)C	C32H37N3O3	511.65	38	14	0.50	2	3	3	153.01	90.28	3.76	5.22	4.94	2.87	5.53	4.46	-6.44	1.85e-04	3.62e-07	Poorly soluble	-6.86	7.00e-05	1.37e-07	Poorly soluble	-8.39	2.06e-06	4.03e-09	Poorly soluble	High	No	Yes	Yes	No	No	No	No	-5.71
250	C[C@H]1[C@@]([H])([C@H](CC2=CNC3=CC=CC=C23)NC4=O)[C@]4(C5=CC=C6N5)[C@@H](/C=C/C[C@H](C)C[C@H](C)C6=O)[C@H]7[C@]1(C)O7	Armochaetoglobins Q					Strong anti-HIV effect of 0.31		Chaetomium	Chaetomium	Unusual pyrrole-based	C[C@H]1C/C=C/[C@H]2[C@@H]3O[C@]3(C)[C@H]([C@@H]3[C@]2(C(=O)N[C@H]3Cc2c[nH]c3c2cccc3)c2[nH]c(C(=O)[C@H](C1)C)cc2)C	C32H37N3O3	511.65	38	14	0.50	2	3	3	153.01	90.28	3.82	5.22	4.94	2.87	5.53	4.47	-6.44	1.85e-04	3.62e-07	Poorly soluble	-6.86	7.00e-05	1.37e-07	Poorly soluble	-8.39	2.06e-06	4.03e-09	Poorly soluble	High	No	Yes	Yes	No	No	No	No	-5.71
251	C[C@H]1[C@@]([H])([C@H](CC2=CNC3=CC=CC=C23)NC4=O)[C@]4(C5=CC=C6N5)[C@@H](/C=C/C[C@H](C)C[C@H](C)C6=O)[C@H](O)C1=C	Armochaetoglobins R					Strong anti-HIV effect of 0.34		Chaetomium	Chaetomium	Unusual pyrrole-based	C[C@H]1C/C=C/[C@H]2[C@@H]3O[C@]3(C)[C@H]([C@@H]3[C@]2(C(=O)N[C@H]3Cc2c[nH]c3c2cccc3)c2[nH]c(C(=O)[C@H](C1)C)cc2)C	C32H37N3O3	511.65	38	14	0.50	2	3	3	153.01	90.28	3.82	5.22	4.94	2.87	5.53	4.47	-6.44	1.85e-04	3.62e-07	Poorly soluble	-6.86	7.00e-05	1.37e-07	Poorly soluble	-8.39	2.06e-06	4.03e-09	Poorly soluble	High	No	Yes	Yes	No	No	No	No	-5.71
252	CC1=C(C)[C@@H](O)[C@H](/C=C/C[C@H](C)/C=C(C)/C2=O)[C@@]3(C4=CC=C2N4)[C@@]1([C@H](CC5=CNC6=CC=CC=C56)NC3=O)[H]	Penochalasins B					Strong anti-HIV effect of 0.11		Chaetomium	Chaetomium		C[C@H]1C/C=C/[C@H]2[C@H](O)C(=C([C@@H]3[C@]2(C(=O)N[C@H]3Cc2c[nH]c3c2cccc3)c2[nH]c(C(=O)/C(=C/1)/C)cc2)C)C	C32H35N3O3	509.64	38	14	0.38	2	3	4	154.21	97.98	3.82	5.22	4.76	2.87	5.53	4.47	-6.44	1.85e-04	3.62e-07	Poorly soluble	-6.86	7.00e-05	1.37e-07	Poorly soluble	-8.39	2.06e-06	4.03e-09	Poorly soluble	High	No	Yes	Yes	No	No	No	No	-5.71
253	C[C@H]1[C@@]([H])([C@H](CC2=CNC3=CC=CC=C23)NC4=O)[C@]4(C5=CC=C6N5)[C@@H](/C=C/C[C@H](C)/C=C(C)/C6=O)[C@H](O)C1=C	Penochalasins C							Chaetomium	Chaetomium		C[C@H]1C/C=C/[C@H]2[C@H](O)C(=C)[C@H]([C@@H]3[C@]2(C(=O)N[C@H]3Cc2c[nH]c3c2cccc3)c2[nH]c(C(=O)/C(=C/1)/C)cc2)C	C32H35N3O3	509.64	38	14	0.38	2	3	4	154.21	97.98	3.82	5.22	4.62	2.87	5.53	4.47	-6.44	1.85e-04	3.62e-07	Poorly soluble	-6.86	7.00e-05	1.37e-07	Poorly soluble	-8.39	2.06e-06	4.03e-09	Poorly soluble	High	No	Yes	Yes	No	No	No	No	-5.71
254	C[C@H]1[C@@]([H])([C@H](CC2=CNC3=CC=CC=C23)NC4=O)[C@]4(C(C[C@]([C@H](C(C)=O)[C@@H](C)C5)([H])[C@]5([H])[C@@H]6OO)=O)[C@]6([H])[C@H]7[C@]1(C)O7	Armochaeglobines A							Chaetomium	Chaetomium		OO[C@H]1[C@@H]2C[C@@H]([C@H]([C@@H]2CC(=O)[C@@]23[C@@H]1[C@@H]1O[C@]1(C)[C@H]([C@H]3[C@@H](NC2=O)Cc1c[nH]c2c1cccc2)C)C(=O)C)C	C30H36N2O6	520.62	38	9	0.63	4	6	3	144.48	121.02	2.71	2.56	3.16	1.90	3.54	2.78	-4.59	1.33e-02	2.56e-05	Moderately soluble	-4.75	9.28e-03	1.78e-05	Moderately soluble	-5.82	7.88e-04	1.51e-06	Moderately soluble	High	No	Yes	No	No	No	Yes	No	-7.66
255	C[C@H]1[C@@]([H])([C@H](CC2=CNC3=CC=CC=C23)NC4=O)[C@]4(C(C[C@@H](C(OC)=O)[C@H](O)/C(C)=C/[C@@H](C)C/C=C/5)=O)[C@]5([H])[C@H]6[C@]1(C)O6	Armochaeglobines B	Mild cytotoxicity effect towards SW480, HL-60, MCF-7, SMMC-7721, and A549 between 3.4 and 14.7						Chaetomium	Chaetomium		COC(=O)[C@@H]1CC(=O)[C@@]23C(=O)N[C@H]([C@@H]2[C@H](C)[C@@]2([C@H]([C@@H]3/C=C/C[C@@H](/C=C(/[C@H]1O)\C)C)O2)C)Cc1c[nH]c2c1cccc2	C33H40N2O6	560.68	41	9	0.55	4	6	3	159.66	121.02	3.89	3.84	3.51	2.32	4.12	3.54	-5.63	1.30e-03	2.32e-06	Moderately soluble	-6.08	4.69e-04	8.37e-07	Poorly soluble	-6.47	1.91e-04	3.41e-07	Poorly soluble	High	No	Yes	No	No	No	No	Yes	-6.99
256	C[C@H]1[C@@]([H])([C@H](CC2=CNC3=CC=CC=C23)NC4=O)[C@]4(C(/C=C/C5=O)=O)[C@](/C=C/C[C@H](C)/C=C(C)/[C@H]5O)([H])[C@H]6[C@]1(C)O6	Armochaeglobines C							Chaetomium	Chaetomium		C[C@H]1C/C=C/[C@H]2[C@@H]3O[C@]3(C)[C@H]([C@@H]3[C@]2(C(=O)N[C@H]3Cc2c[nH]c3c2cccc3)C(=O)/C=C/C(=O)[C@@H](/C(=C/1)/C)O)C	C32H36N2O5	528.64	39	9	0.47	2	5	3	153.29	111.79	2.99	3.71	3.45	2.03	4.03	3.24	-5.49	1.70e-03	3.21e-06	Moderately soluble	-5.75	9.43e-04	1.78e-06	Moderately soluble	-6.36	2.31e-04	4.37e-07	Poorly soluble	High	No	Yes	No	No	No	No	Yes	-6.89
257	C[C@H]1[C@@]([H])([C@H](CC2=CNC3=CC=CC=C23)NC4=O)[C@]4(C(CC[C@H](O)C5=O)=O)[C@](/C=C/C[C@H](C)/C=C5\C)([H])[C@H](O)[C@@]1(C)O	Cytoglobosins H							Chaetomium	Chaetomium		C[C@H]1C/C=C/[C@H]2[C@H](O)[C@@](C)(O)[C@H]([C@@H]3[C@]2(C(=O)N[C@H]3Cc2c[nH]c3c2cccc3)C(=O)CC[C@@H](C(=O)/C(=C/1)/C)O)C	C32H40N2O6	548.67	40	9	0.53	2	6	5	157.12	139.72	2.86	2.96	2.63	1.32	3.23	2.60	-5.14	3.97e-03	7.23e-06	Moderately soluble	-5.56	1.52e-03	2.77e-06	Moderately soluble	-5.92	6.58e-04	1.20e-06	Moderately soluble	Low	No	Yes	No	No	No	No	Yes	-7.55
258	C[C@H]1[C@@]([H])([C@H](CC2=CNC3=CC=CC=C23)NC4=O)[C@]4(C(CC[C@H](O)C5=O)=O)[C@](/C=C/C[C@H](C)/C=C5\C)([H])[C@H](O)[C@@]1(O)C	Cytoglobosins I	No cytotoxic against MDA-MB-231, LNCaP, and B16F10						Chaetomium	Chaetomium		C[C@H]1C/C=C/[C@H]2[C@H](O)[C@](C)(O)[C@H]([C@@H]3[C@]2(C(=O)N[C@H]3Cc2c[nH]c3c2cccc3)C(=O)CC[C@@H](C(=O)/C(=C/1)/C)O)C	C32H40N2O6	548.67	40	9	0.53	2	6	5	157.12	139.72	2.85	2.96	2.63	1.32	3.23	2.60	-5.14	3.97e-03	7.23e-06	Moderately soluble	-5.56	1.52e-03	2.77e-06	Moderately soluble	-5.92	6.58e-04	1.20e-06	Moderately soluble	Low	No	Yes	No	No	No	No	Yes	-7.55
259	C[C@H]1[C@@]([H])([C@H](CC2=CNC3=CC=CC=C23)NC4=O)[C@]4(C(CC[C@H](O)C5=O)=O)[C@](/C=C/C[C@H](C)/C=C5\C)([H])C([C@@H]1C)=O	Chaetoglobosin Y	No cytotoxic against U937, H1975, K562, MOLT-4, BGC823, MCF-7, Hela, A549, Huh-7, HL60	No anti-tuberculosis activity					Chaetomium	Chaetomium		C[C@H]1C/C=C/[C@H]2C(=O)[C@H](C)[C@H]([C@@H]3[C@]2(C(=O)N[C@H]3Cc2c[nH]c3c2cccc3)C(=O)CC[C@@H](C(=O)/C(=C/1)/C)O)C	C32H38N2O5	530.65	39	9	0.50	2	5	3	154.95	116.33	2.69	4.21	3.72	2.03	4.31	3.39	-5.82	8.01e-04	1.51e-06	Moderately soluble	-6.36	2.30e-04	4.34e-07	Poorly soluble	-6.99	5.39e-05	1.02e-07	Poorly soluble	High	No	Yes	No	No	No	No	Yes	-6.55
260	CC1[C@@]([H])([C@H](CC2=CNC3=CC=CC=C23)NC4=O)[C@]4(C(CCCC/C(C)=C/[C@@H](C)C/C=C/5)=O)[C@]5([H])C=C1C	Prochaetoglobosins I		Weak to potent antimicrobial effect against Bacillus subtilis, Salmonella typhimurium, and Staphylococcus aureus between 4 and 512					Chaetomium	Chaetomium		C[C@H]1C/C=C/[C@H]2C=C(C)C([C@@H]3[C@]2(C(=O)N[C@H]3Cc2c[nH]c3c2cccc3)C(=O)CCCC/C(=C/1)/C)C	C32H40N2O2	484.67	36	9	0.50	2	2	2	152.92	61.96	4.01	6.03	6.31	4.55	5.80	5.34	-6.70	9.74e-05	2.01e-07	Poorly soluble	-7.11	3.76e-05	7.77e-08	Poorly soluble	-8.05	4.27e-06	8.81e-09	Poorly soluble	High	No	No	No	No	Yes	No	Yes	-4.98
261	CC1[C@@]([H])([C@H](CC2=CNC3=CC=CC=C23)NC4=O)[C@]4(C(CCC5=O)=O)[C@](/C=C/C[C@H](C)/C=C(C)/C5)([H])C=C1C	Prochaetoglobosins II		Weak to potent antimicrobial effect against Bacillus subtilis, Salmonella typhimurium, and Staphylococcus aureus between 4 and 512					Chaetomium	Chaetomium		O=C1CCC(=O)[C@]23C(=O)N[C@H]([C@@H]3C(C(=C[C@@H]2/C=C/C[C@@H](/C=C(/C1)\C)C)C)C)Cc1c[nH]c2c1cccc2	C32H38N2O3	498.66	37	9	0.47	2	3	2	153.12	79.03	3.56	4.51	5.49	3.65	5.50	4.54	-5.82	7.53e-04	1.51e-06	Moderately soluble	-5.89	6.41e-04	1.29e-06	Moderately soluble	-7.93	5.89e-06	1.18e-08	Poorly soluble	High	No	Yes	No	No	Yes	No	Yes	-6.14
262	C[C@H]1[C@@]([H])([C@H](CC2=CNC3=CC=CC=C23)NC4=O)[C@]4(C(CC[C@H](O)C5=O)=O)[C@](/C=C/C[C@H](C)/C=C5\C)([H])[C@H](O)[C@]1(C)O	Armochaetoglobin S	No cytotoxicity against SMMC-7721, HL-60, A549, SW480, MCF-7, and BEAS-2B						Chaetomium	Chaetomium		C[C@H]1C/C=C/[C@H]2[C@H](O)[C@](C)(O)[C@H]([C@@H]3[C@]2(C(=O)N[C@H]3Cc2c[nH]c3c2cccc3)C(=O)CC[C@@H](C(=O)/C(=C/1)/C)O)C	C32H40N2O6	548.67	40	9	0.53	2	6	5	157.12	139.72	2.85	2.96	2.63	1.32	3.23	2.60	-5.14	3.97e-03	7.23e-06	Moderately soluble	-5.56	1.52e-03	2.77e-06	Moderately soluble	-5.92	6.58e-04	1.20e-06	Moderately soluble	Low	No	Yes	No	No	No	No	Yes	-7.55
263	C[C@H]1[C@@]([H])([C@H](CC2=CNC3=CC=CC=C23)NC4=O)[C@]4(C(CC[C@H](O)C5=O)=O)[C@](/C=C/C[C@H](C)/C=C5\C)([H])[C@H](OC(C)=O)[C@]1(C)O	7-O-Acetylarmochaetoglobin S	No cytotoxicity against SMMC-7721, HL-60, A549, SW480, MCF-7, and BEAS-2B						Chaetomium	Chaetomium		CC(=O)O[C@H]1[C@@H]2/C=C/C[C@H](C)/C=C(/C(=O)[C@H](CCC(=O)[C@@]32C(=O)N[C@H]([C@@H]3[C@@H]([C@@]1(C)O)C)Cc1c[nH]c2c1cccc2)O)\C	C34H42N2O7	590.71	43	9	0.53	4	7	4	166.85	145.79	3.45	3.54	3.20	1.65	3.74	3.12	-5.62	1.41e-03	2.38e-06	Moderately soluble	-6.29	3.06e-04	5.17e-07	Poorly soluble	-6.52	1.79e-04	3.03e-07	Poorly soluble	Low	No	Yes	No	No	No	No	Yes	-7.39
264	C[C@H]1[C@@]([H])([C@H](CC23C4=CC=CC=C4NC2O3)NC5=O)[C@]5(C(CC[C@H](O)C6=O)=O)[C@](/C=C/C[C@H](C)/C=C6\C)([H])[C@H]7[C@]1(C)O7	armochaetoglobins T	No cytotoxicity against SMMC-7721, HL-60, A549, SW480, MCF-7, and BEAS-2B						Chaetomium	Chaetomium		C[C@H]1C/C=C/[C@H]2[C@@H]3O[C@]3(C)[C@H]([C@@H]3[C@]2(C(=O)N[C@H]3CC23OC2Nc2c3cccc2)C(=O)CC[C@@H](C(=O)/C(=C/1)/C)O)C	C32H38N2O6	546.65	40	6	0.59	2	6	3	155.69	120.56	3.20	3.13	2.34	1.87	3.48	2.81	-5.18	3.61e-03	6.60e-06	Moderately soluble	-5.33	2.55e-03	4.67e-06	Moderately soluble	-6.01	5.28e-04	9.66e-07	Poorly soluble	High	No	Yes	No	No	No	No	No	-7.41
265	C[C@H]1[C@@]([H])([C@H](CC2=CNC3=CC=CC=C23)NC4=O)[C@]4(C(CCC5=O)=O)[C@](/C=C/C[C@H](C)/C=C(C)/C5=O)([H])[C@H](O)[C@@]1(C)O	armochaetoglobins U	No cytotoxicity against SMMC-7721, HL-60, A549, SW480, MCF-7, and BEAS-2B						Chaetomium	Chaetomium		C[C@H]1C/C=C/[C@H]2[C@H](O)[C@@](C)(O)[C@H]([C@@H]3[C@]2(C(=O)N[C@H]3Cc2c[nH]c3c2cccc3)C(=O)CCC(=O)C(=O)/C(=C/1)/C)C	C32H38N2O6	546.65	40	9	0.50	2	6	4	156.15	136.56	2.67	2.71	2.84	1.25	3.81	2.66	-4.97	5.84e-03	1.07e-05	Moderately soluble	-5.23	3.21e-03	5.87e-06	Moderately soluble	-6.62	1.32e-04	2.41e-07	Poorly soluble	Low	No	Yes	No	No	No	No	Yes	-7.71
266	[H][C@@]1([C@H](CC2=CNC3=CC=CC=C23)N4)[C@](O)(C)[C@H](C)[C@@H](O)[C@@](/C=C/C[C@H](C)/C=C5\C)([H])[C@]1(C(CC[C@H](O)C5=O)=O)C4=O	armochaetoglobins V	No cytotoxicity against SMMC-7721, HL-60, A549, SW480, MCF-7, and BEAS-2B						Chaetomium	Chaetomium		C[C@H]1C/C=C/[C@H]2[C@H](O)[C@@H](C)[C@]([C@@H]3[C@]2(C(=O)N[C@H]3Cc2c[nH]c3c2cccc3)C(=O)CC[C@@H](C(=O)/C(=C/1)/C)O)(C)O	C32H40N2O6	548.67	40	9	0.53	2	6	5	157.12	139.72	2.48	2.96	2.63	1.32	3.23	2.52	-5.14	3.97e-03	7.23e-06	Moderately soluble	-5.56	1.52e-03	2.77e-06	Moderately soluble	-5.92	6.58e-04	1.20e-06	Moderately soluble	Low	No	Yes	No	No	No	No	Yes	-7.55
267	[H][C@@]1([C@H](CC2=CNC3=CC=CC=C23)N4)[C@H](C)C(CO)=C[C@@](/C=C/C[C@H](C)/C=C5\C)([H])[C@]1(C(CC[C@H](O)C5=O)=O)C4=O	armochaetoglobins W	No cytotoxicity against SMMC-7721, HL-60, A549, SW480, MCF-7, and BEAS-2B						Chaetomium	Chaetomium		OCC1=C[C@@H]2/C=C/C[C@H](C)/C=C(/C(=O)[C@H](CCC(=O)[C@]32[C@@H]([C@@H]1C)[C@@H](NC3=O)Cc1c[nH]c2c1cccc2)O)\C	C32H38N2O5	530.65	39	9	0.47	3	5	4	155.44	119.49	2.99	3.30	3.44	2.03	3.99	3.15	-5.18	3.49e-03	6.58e-06	Moderately soluble	-5.48	1.74e-03	3.27e-06	Moderately soluble	-6.53	1.57e-04	2.96e-07	Poorly soluble	High	No	Yes	No	No	No	No	Yes	-7.19
268	C[C@H]1[C@@]([H])([C@H](CC2=CNC3=CC=CC=C23)NC4=O)[C@]4(C(C[C@@]5([H])C6=O)=O)[C@](/C=C/C[C@H](C)[C@@]5([H])C(C)=C6O)([H])[C@H](O)[C@]1(C)O	armochaetoglobins X	No cytotoxicity against SMMC-7721, HL-60, A549, SW480, MCF-7, and BEAS-2B						Chaetomium	Chaetomium		C[C@H]1C/C=C/[C@H]2[C@H](O)[C@](C)(O)[C@H]([C@@H]3[C@@]2(C(=O)C[C@@H]2[C@@H]1C(=C(C2=O)O)C)C(=O)N[C@H]3Cc1c[nH]c2c1cccc2)C	C32H38N2O6	546.65	40	9	0.53	2	6	5	155.41	139.72	2.99	3.30	3.01	2.03	3.99	3.15	-5.18	3.49e-03	6.58e-06	Moderately soluble	-5.48	1.74e-03	3.27e-06	Moderately soluble	-6.53	1.57e-04	2.96e-07	Poorly soluble	High	No	Yes	No	No	No	No	Yes	-7.19
269	C[C@H]1[C@@]([H])([C@H](CC2=CNC3=CC=CC=C23)NC4=O)[C@]4(C(C[C@@]5([H])C6=O)=O)[C@](/C=C/C[C@H](C)[C@@]5([H])C(C)=C6)([H])[C@H]7[C@]1(C)O7	armochaetoglobins Y	Active against SMMC-7721, HL-60, A549, SW480, BEAS-2B from 14.13 to 30.42						Chaetomium	Chaetomium		O=C1C=C([C@H]2[C@H]1CC(=O)[C@@]13C(=O)N[C@H]([C@@H]1[C@H](C)[C@@]1([C@H]([C@@H]3/C=C/C[C@@H]2C)O1)C)Cc1c[nH]c2c1cccc2)C	C32H36N2O4	512.64	38	9	0.53	2	4	2	150.49	91.56	3.53	3.76	4.17	2.91	4.92	3.86	-5.43	1.90e-03	3.71e-06	Moderately soluble	-5.38	2.16e-03	4.21e-06	Moderately soluble	-7.18	3.35e-05	6.53e-08	Poorly soluble	High	No	Yes	No	No	No	No	No	-6.76
270	CC1=C(C)[C@@H](O)[C@@](/C=C/C[C@H](C)[C@@]2([H])C(C)=C3)([H])[C@@]4(C(C[C@@]2([H])C3=O)=O)[C@@]1([C@H](CC5=CNC6=CC=CC=C56)NC4=O)[H]	armochaetoglobins Z	Cytotoxic effect against HL-60, A549, BEAS-2B of 10.45, 23.11 and 10.45						Chaetomium	Chaetomium		O=C1C=C([C@H]2[C@H]1CC(=O)[C@@]13C(=O)N[C@H]([C@@H]1C(=C([C@H]([C@@H]3/C=C/C[C@@H]2C)O)C)C)Cc1c[nH]c2c1cccc2)C	C32H36N2O4	512.64	38	9	0.47	2	4	3	152.17	99.26	3.22	2.66	4.07	2.83	4.59	3.48	-4.74	9.38e-03	1.83e-05	Moderately soluble	-4.40	2.06e-02	4.02e-05	Moderately soluble	-7.09	4.19e-05	8.17e-08	Poorly soluble	High	No	Yes	No	No	No	No	Yes	-7.54
271	C[C@H]1[C@@]([H])([C@H](CC2=CNC3=CC=CC=C23)NC4=O)[C@]4(C(C[C@@]5([H])[C@@]6([H])C(C)=C(O)C5=O)=O)[C@](/C=C/C[C@@H]6C)([H])[C@H](O)C1=C	Cytoglobosin Ab	No cytotoxic against H292						Chaetomium	Chaetomium		C=C1[C@@H](C)[C@H]2[C@@H](NC(=O)[C@]32[C@H]([C@@H]1O)/C=C/C[C@@H]([C@H]1[C@H](CC3=O)C(=O)C(=C1C)O)C)Cc1c[nH]c2c1cccc2	C32H36N2O5	528.64	39	9	0.47	2	5	4	153.74	119.49	2.86	3.09	3.82	2.03	3.98	3.16	-5.10	4.17e-03	7.89e-06	Moderately soluble	-5.27	2.86e-03	5.41e-06	Moderately soluble	-6.51	1.63e-04	3.08e-07	Poorly soluble	High	No	Yes	No	No	No	No	Yes	-7.33
272	C[C@H]1[C@@]([H])([C@H](CC2=CNC3=CC=CC=C23)NC4=O)C4(C5=CNC=C56)[C@](/C=C/C[C@@H](/C=C(C)/C6=O)C)([H])[C@H](O)C1=C	Isochaetoglobosin Db	Cytotoxic ability against H292 of 3.5						Chaetomium	Chaetomium		C[C@H]1C/C=C/[C@H]2[C@H](O)C(=C)[C@H]([C@@H]3C2(c2c(C(=O)/C(=C/1)/C)c[nH]c2)C(=O)N[C@H]3Cc1c[nH]c2c1cccc2)C	C32H35N3O3	509.64	38	14	0.38	2	3	4	154.21	97.98	2.06	4.16	4.62	2.73	5.07	3.73	-5.76	8.83e-04	1.73e-06	Moderately soluble	-5.93	6.05e-04	1.19e-06	Moderately soluble	-8.08	4.23e-06	8.30e-09	Poorly soluble	High	No	Yes	Yes	No	Yes	No	Yes	-6.46
273	[H][C@@]1([C@]2(CC3=CC=C(O)C=C3)N4)[C@H](C)[C@](C)(O2)[C@@H](O)[C@@](/C=C/C[C@H](C)/C=C5\C)([H])[C@]1(C(CC[C@H](O)C5=O)=O)C4=O	Armochaetoglasins A	No cytotoxic against SW480, HT1080, SW1990, MM231, HL60, U87MG, HEP3B, A549	No antibacterial activity against K. pneumonia, E. coli, and S. aureus					Chaetomium	Chaetomium		C[C@H]1C/C=C/[C@H]2[C@H](O)[C@@]3(C)O[C@@]4([C@@H]([C@@]2(C(=O)CC[C@@H](C(=O)/C(=C/1)/C)O)C(=O)N4)[C@@H]3C)Cc1ccc(cc1)O	C30H37NO7	523.62	38	6	0.57	2	7	4	145.13	133.16	3.15	2.71	2.22	1.09	2.69	2.37	-4.78	8.72e-03	1.67e-05	Moderately soluble	-5.16	3.62e-03	6.92e-06	Moderately soluble	-5.02	5.02e-03	9.59e-06	Moderately soluble	High	No	Yes	No	No	No	No	Yes	-7.57
274	C[C@H]1[C@@]([H])([C@H](CC2=CNC3=CC=CC=C23)NC4=O)[C@]4(C(CCC(OC)=O)=O)[C@](/C=C/CC(C)/C=C(C)/C(OC)=O)([H])[C@H]5[C@]1(C)O5	Armochaetoglasins B	Weak selective cytotoxicity against SW480, HT1080, SW1990, MM231, HL60, U87MG, HEP3B, A549between 19.5 and 34.72	No antibacterial activity against K. pneumonia, E. coli, and S. aureus					Chaetomium	Chaetomium		COC(=O)CCC(=O)[C@]12C(=O)N[C@H]([C@@H]2[C@@H]([C@@]2([C@H]([C@@H]1/C=C/CC(/C=C(/C(=O)OC)\C)C)O2)C)C)Cc1c[nH]c2c1cccc2	C34H42N2O7	590.71	43	9	0.53	13	7	2	166.70	127.09	4.79	4.04	4.08	2.46	6.54	4.38	-5.34	2.67e-03	4.52e-06	Moderately soluble	-6.41	2.29e-04	3.87e-07	Poorly soluble	-7.21	3.66e-05	6.19e-08	Poorly soluble	Low	No	Yes	No	No	Yes	No	Yes	-7.03
275	C[C@H]1[C@@]([H])([C@H](CC2=CNC3=CC=CC=C23)NC4=O)[C@]4(C(CCC(OC)=O)=O)[C@](/C=C/CC(C)/C=C(C)/C=O)([H])C=C1C	Armochaetoglasins C	No cytotoxic against SW480, HT1080, SW1990, MM231, HL60, U87MG, HEP3B, A549	No antibacterial activity against K. pneumonia, E. coli, and S. aureus					Chaetomium	Chaetomium		COC(=O)CCC(=O)[C@@]12[C@@H](/C=C/CC(/C=C(/C=O)\C)C)C=C([C@H]([C@H]2[C@@H](NC1=O)Cc1c[nH]c2c1cccc2)C)C	C33H40N2O5	544.68	40	9	0.45	12	5	2	161.32	105.33	4.00	4.24	4.89	2.96	6.87	4.59	-5.26	2.97e-03	5.46e-06	Moderately soluble	-6.16	3.74e-04	6.87e-07	Poorly soluble	-7.40	2.18e-05	4.00e-08	Poorly soluble	High	No	Yes	No	No	Yes	No	Yes	-6.61
276	C[C@H]1[C@@]([H])([C@H](CC2=CNC3=CC=CC=C23)NC4=O)[C@]4(C(CCC5=O)=O)[C@](/C=C/C[C@H](C)/C=C(C)/C5)([H])C=C1C	Armochaetoglasins D	No cytotoxic against SW480, HT1080, SW1990, MM231, HL60, U87MG, HEP3B, A550	No antibacterial activity against K. pneumonia, E. coli, and S. aureus					Chaetomium	Chaetomium		O=C1CCC(=O)[C@]23C(=O)N[C@H]([C@@H]3[C@@H](C(=C[C@@H]2/C=C/C[C@@H](/C=C(/C1)\C)C)C)C)Cc1c[nH]c2c1cccc2	C32H38N2O3	498.66	37	9	0.47	2	3	2	153.12	79.03	3.83	4.51	5.49	3.65	5.50	4.59	-5.82	7.53e-04	1.51e-06	Moderately soluble	-5.89	6.41e-04	1.29e-06	Moderately soluble	-7.93	5.89e-06	1.18e-08	Poorly soluble	High	No	Yes	No	No	Yes	No	Yes	-6.14
277	C[C@H]1[C@@]([H])([C@H](CC2=CNC3=CC=CC=C23)NC4=O)[C@]4(C(CC[C@H](O)C/C(C)=C/[C@@H](C)C/C=C/5)=O)[C@]5([H])C=C1C	Armochaetoglasins E	No cytotoxic against SW480, HT1080, SW1990, MM231, HL60, U87MG, HEP3B, A551	No antibacterial activity against K. pneumonia, E. coli, and S. aureus					Chaetomium	Chaetomium		O[C@H]1CCC(=O)[C@]23C(=O)N[C@H]([C@@H]3[C@@H](C(=C[C@@H]2/C=C/C[C@@H](/C=C(/C1)\C)C)C)C)Cc1c[nH]c2c1cccc2	C32H40N2O3	500.67	37	9	0.50	2	3	3	154.08	82.19	4.04	4.87	5.29	3.72	4.91	4.56	-6.06	4.36e-04	8.70e-07	Poorly soluble	-6.33	2.34e-04	4.67e-07	Poorly soluble	-7.23	2.93e-05	5.86e-08	Poorly soluble	High	No	Yes	No	No	No	No	Yes	-5.90
278	C[C@H]1[C@@]([H])([C@H](CC2=CNC3=CC=CC=C23)NC4=O)[C@]4(C(C[C@@H](O)CC/C(C)=C/[C@@H](C)C/C=C/5)=O)[C@]5([H])C=C1C	Armochaetoglasins F	No cytotoxic against SW480, HT1080, SW1990, MM231, HL60, U87MG, HEP3B, A552	No antibacterial activity against K. pneumonia, E. coli, and S. aureus					Chaetomium	Chaetomium		O[C@H]1CC/C(=C/[C@@H](C)C/C=C/[C@@H]2[C@]3(C(=O)C1)C(=O)N[C@H]([C@@H]3[C@@H](C(=C2)C)C)Cc1c[nH]c2c1cccc2)/C	C32H40N2O3	500.67	37	9	0.50	2	3	3	154.08	82.19	3.32	4.87	5.29	3.72	4.91	4.42	-6.06	4.36e-04	8.70e-07	Poorly soluble	-6.33	2.34e-04	4.67e-07	Poorly soluble	-7.23	2.93e-05	5.86e-08	Poorly soluble	High	No	Yes	No	No	No	No	Yes	-5.90
279	C[C@H]1[C@@]([H])([C@H]([C@@H](OC)C2=CNC3=CC=CC=C23)NC4=O)[C@]4(C(CC[C@H](O)C5=O)=O)[C@](/C=C/C[C@H](C)/C=C5\C)([H])C=C1C	Armochaetoglasins G	No cytotoxic against SW480, HT1080, SW1990, MM231, HL60, U87MG, HEP3B, A553	No antibacterial activity against K. pneumonia, E. coli, and S. aureus					Chaetomium	Chaetomium		CO[C@@H](c1c[nH]c2c1cccc2)[C@@H]1NC(=O)[C@@]23[C@H]1[C@H](C)C(=C[C@@H]3/C=C/C[C@H](C)/C=C(/C(=O)[C@H](CCC2=O)O)\C)C	C33H40N2O5	544.68	40	9	0.48	3	5	3	160.17	108.49	3.47	3.98	4.29	2.22	4.38	3.67	-5.69	1.10e-03	2.03e-06	Moderately soluble	-5.96	5.98e-04	1.10e-06	Moderately soluble	-6.84	7.87e-05	1.45e-07	Poorly soluble	High	No	Yes	No	No	No	No	Yes	-6.80
280	C[C@H]1[C@@]([H])([C@H](CC23C4=CC=CC=C4NC2O3)NC5=O)[C@]5(C(CCC6=O)=O)[C@](/C=C/C[C@H](C)/C=C(C)/C6=O)([H])[C@H]7[C@]1(C)O7	Armochaetoglasins H	No cytotoxic against SW480, HT1080, SW1990, MM231, HL60, U87MG, HEP3B, A554	No antibacterial activity against K. pneumonia, E. coli, and S. aureus					Chaetomium	Chaetomium		C[C@H]1C/C=C/[C@H]2[C@@H]3O[C@]3(C)[C@H]([C@@H]3[C@]2(C(=O)N[C@H]3CC23OC2Nc2c3cccc2)C(=O)CCC(=O)C(=O)/C(=C/1)/C)C	C32H36N2O6	544.64	40	6	0.56	2	6	2	154.73	117.40	3.04	2.88	2.55	1.80	4.07	2.87	-5.01	5.32e-03	9.77e-06	Moderately soluble	-5.01	5.38e-03	9.88e-06	Moderately soluble	-6.71	1.06e-04	1.94e-07	Poorly soluble	High	No	Yes	No	No	No	No	No	-7.58
281	C[C@H]1[C@@]([H])([C@H](CC2=CNC3=CC=CC=C23)NC4=O)[C@]4(C(CCC5=O)=O)[C@](/C=C/C[C@H](C)/C=C(C)/C5=O)([H])C([C@H]1C)=O	Armochaetoglasins I	No cytotoxic against SW480, HT1080, SW1990, MM231, HL60, U87MG, HEP3B, A555	No antibacterial activity against K. pneumonia, E. coli, and S. aureus					Chaetomium	Chaetomium		C[C@H]1C/C=C/[C@H]2C(=O)[C@@H](C)[C@H]([C@@H]3[C@]2(C(=O)N[C@H]3Cc2c[nH]c3c2cccc3)C(=O)CCC(=O)C(=O)/C(=C/1)/C)C	C32H36N2O5	528.64	39	9	0.47	2	5	2	153.99	113.17	2.80	3.96	3.93	1.96	4.90	3.51	-5.65	1.18e-03	2.23e-06	Moderately soluble	-6.04	4.85e-04	9.18e-07	Poorly soluble	-7.69	1.08e-05	2.05e-08	Poorly soluble	High	No	Yes	No	No	No	No	Yes	-6.71
282	C[C@H]1[C@@]([H])([C@H](CC2=CNC3=CC=CC=C23)NC4=O)[C@]4(C(CCC(OC)=O)=O)[C@](/C=C/CC(C)/C=C(C)/C=O)([H])[C@H]5[C@]1(C)O5	Armochaetoglobin E	No cytotoxic against SW480, HT1080, SW1990, MM231, HL60, U87MG, HEP3B, A556	No antibacterial activity against K. pneumonia, E. coli, and S. aureus					Chaetomium	Chaetomium		COC(=O)CCC(=O)[C@]12C(=O)N[C@H]([C@@H]2[C@@H]([C@@]2([C@H]([C@@H]1/C=C/CC(/C=C(/C=O)\C)C)O2)C)C)Cc1c[nH]c2c1cccc2	C33H40N2O6	560.68	41	9	0.52	12	6	2	160.81	117.86	3.95	3.65	4.10	2.24	6.72	4.13	-4.99	5.79e-03	1.03e-05	Moderately soluble	-5.81	8.61e-04	1.54e-06	Moderately soluble	-7.12	4.26e-05	7.60e-08	Poorly soluble	High	No	Yes	No	No	Yes	No	Yes	-7.13
283	C[C@H]1[C@@]([H])([C@H](CC2=CNC3=CC=CC=C23)NC4=O)[C@]4(C(/C=C/C5=O)=O)[C@](/C=C/C[C@H](C)/C=C(C)/[C@H]5O)([H])C=C1C	Chaetoglobosin J	Weak selective cytotoxicity against SW480, HT1080, SW1990, MM231, HL60, U87MG, HEP3B, A549between 19.5 and 34.72	No antibacterial activity against K. pneumonia, E. coli, and S. aureus					Chaetomium	Chaetomium		C[C@H]1C/C=C/[C@H]2C=C(C)[C@H]([C@@H]3[C@]2(C(=O)N[C@H]3Cc2c[nH]c3c2cccc3)C(=O)/C=C/C(=O)[C@@H](/C(=C/1)/C)O)C	C32H36N2O4	512.64	38	9	0.41	2	4	3	153.81	99.26	3.23	4.30	4.24	2.76	4.20	3.75	-5.77	8.69e-04	1.70e-06	Moderately soluble	-6.10	4.09e-04	7.98e-07	Poorly soluble	-6.64	1.18e-04	2.30e-07	Poorly soluble	High	No	Yes	No	No	Yes	No	Yes	-6.37
284	C[C@H]1[C@@]([H])([C@H](CC2=CN(C)C3=CC=CC=C23)NC4=O)[C@]4(C(/C=C/C[C@H](O)/C(C)=C/[C@@H](C)C/C=C/5)=O)[C@]5([H])C=C1C	Armochaetoglosins A							Chaetomium	Chaetomium		C[C@H]1C/C=C/[C@H]2C=C(C)[C@H]([C@@H]3[C@]2(C(=O)N[C@H]3Cc2c[nH]c3c2cccc3)C(=O)/C=C/C(=O)[C@@H](/C(=C/1)/C)O)C	C32H36N2O4	512.64	38	9	0.41	2	4	3	153.81	99.26	3.23	4.30	4.24	2.76	4.20	3.75	-5.77	8.69e-04	1.70e-06	Moderately soluble	-6.10	4.09e-04	7.98e-07	Poorly soluble	-6.64	1.18e-04	2.30e-07	Poorly soluble	High	No	Yes	No	No	Yes	No	Yes	-6.37
285	C[C@H]1[C@@]([H])([C@H](CC2=CN(C)C3=CC=CC=C23)NC4=O)[C@]4(C(CCCC/C(C)=C/[C@@H](C)C/C=C/5)=O)[C@]5([H])C=C1CO	Armochaetoglosins B							Chaetomium	Chaetomium		OCC1=C[C@@H]2/C=C/C[C@H](C)/C=C(/CCCCC(=O)[C@]32[C@@H]([C@@H]1C)[C@@H](NC3=O)Cc1cn(c2c1cccc2)C)\C	C33H42N2O3	514.70	38	9	0.52	3	3	2	158.98	71.33	3.77	4.73	5.30	3.90	4.68	4.48	-5.99	5.29e-04	1.03e-06	Moderately soluble	-5.96	5.68e-04	1.10e-06	Moderately soluble	-7.03	4.86e-05	9.44e-08	Poorly soluble	High	No	Yes	No	No	No	No	Yes	-6.08
286	C[C@H]1[C@@]([H])([C@H](CC2=CN(C)C3=CC=CC=C23)NC4=O)[C@]4(C(C[C@]5([H])C6=O)=O)[C@](/C=C/C[C@H](C)[C@]5([H])C(C)=C6)([H])[C@H]7[C@]1(C)O7	Armochaetoglosins C		Potent antibacterial effect against K. pneumoniae of 4					Chaetomium	Chaetomium		O=C1C=C([C@@H]2[C@@H]1CC(=O)[C@@]13C(=O)N[C@H]([C@@H]1[C@H](C)[C@@]1([C@H]([C@@H]3/C=C/C[C@@H]2C)O1)C)Cc1cn(c2c1cccc2)C)C	C33H38N2O4	526.67	39	9	0.55	2	4	1	155.39	80.70	4.03	3.71	4.18	3.09	4.42	3.89	-5.48	1.74e-03	3.30e-06	Moderately soluble	-5.10	4.22e-03	8.02e-06	Moderately soluble	-6.73	9.81e-05	1.86e-07	Poorly soluble	High	No	Yes	No	No	No	No	No	-6.88
287	C[C@H]1[C@@]([H])([C@H](CC2=CNC3=CC=CC=C23)NC4=O)[C@]4(C(/C=C/C[C@H](O)/C(C)=C/[C@@H](C)C/C=C/5)=O)[C@]5([H])C=C1C	Chaetoglobosin T							Chaetomium	Chaetomium		C[C@H]1C/C=C/[C@H]2C=C(C)[C@H]([C@@H]3[C@]2(C(=O)N[C@H]3Cc2c[nH]c3c2cccc3)C(=O)/C=C/C[C@@H](/C(=C/1)/C)O)C	C32H38N2O3	498.66	37	9	0.44	2	3	3	153.61	82.19	4.03	3.71	5.06	3.09	4.42	3.89	-5.48	1.74e-03	3.30e-06	Moderately soluble	-5.10	4.22e-03	8.02e-06	Moderately soluble	-6.73	9.81e-05	1.86e-07	Poorly soluble	High	No	Yes	No	No	No	No	No	-6.88
288	O=C([C@]12[C@@]3([H])[C@H](C)C(C)=C[C@@]1(O)[C@@]([H])([C@]4(C)C[C@H](C)C[C@H](C)C(O4)=O)CC2=O)N(C)C([C@@H]3C5=CC=CC=C5)=O	Chamiside A		Moderate antibacterial effect towards S. aureus (ATCC 6538) of 25					Chaetomium	Chaetomium	Unusual 6/6/5-fused tricyclic ring system, bearing the rare lactone seven membered and a benzene ring	C[C@@H]1C[C@H](C)C(=O)O[C@](C1)(C)[C@H]1CC(=O)[C@@]23[C@@]1(O)C=C(C)[C@H]([C@H]3[C@H](C(=O)N(C2=O)C)c1ccccc1)C	C30H37NO6	507.62	37	6	0.60	2	6	1	142.71	100.98	3.54	2.97	3.27	3.23	3.85	3.37	-4.85	7.23e-03	1.42e-05	Moderately soluble	-4.75	8.95e-03	1.76e-05	Moderately soluble	-5.92	6.12e-04	1.21e-06	Moderately soluble	High	No	Yes	No	No	No	No	Yes	-7.29
289	C[C@H]1[C@@]([H])([C@H](CC2=CNC3=CC=CC=C23)NC4=O)[C@]4(C(CCC5=O)=O)[C@](/C=C/C[C@H](C)/C=C(C)/C5=O)([H])C([C@H]1C)=O	Chaetomadrasins A	Mild cytotoxic effect against HepG2 of 8.7						Chaetomium	Chaetomium		C[C@H]1C/C=C/[C@H]2C(=O)[C@@H](C)[C@H]([C@@H]3[C@]2(C(=O)N[C@H]3Cc2c[nH]c3c2cccc3)C(=O)CCC(=O)C(=O)/C(=C/1)/C)C	C32H36N2O5	528.64	39	9	0.47	2	5	2	153.99	113.17	2.80	3.96	3.93	1.96	4.90	3.51	-5.65	1.18e-03	2.23e-06	Moderately soluble	-6.04	4.85e-04	9.18e-07	Poorly soluble	-7.69	1.08e-05	2.05e-08	Poorly soluble	High	No	Yes	No	No	No	No	Yes	-6.71
290	CC1=C(C)[C@@H](O)[C@@]2([H])[C@@]3(C(C[C@](C(C(O)=C4C)=O)([H])[C@@]4([H])[C@@H](C)C/C=C/2)=O)[C@@]1([C@H](C[C@@]5(O)C6=CC=CC=C6NC5=O)NC3=O)[H]	Chaetomadrasins B	Mild cytotoxic effect against HepG2 of 19.4						Chaetomium	Chaetomium		C[C@H]1C/C=C/[C@H]2[C@H](O)C(=C([C@@H]3[C@@]2(C(=O)C[C@@H]2[C@@H]1C(=C(C2=O)O)C)C(=O)N[C@H]3C[C@]1(O)C(=O)Nc2c1cccc2)C)C	C32H36N2O7	560.64	41	6	0.50	2	7	5	158.06	153.03	2.57	0.60	1.79	0.95	2.52	1.68	-3.67	1.20e-01	2.14e-04	Soluble	-3.39	2.30e-01	4.10e-04	Soluble	-5.69	1.13e-03	2.02e-06	Moderately soluble	Low	No	No	No	No	No	No	No	-9.29
291	CC1=C(C)[C@@H](O)[C@@](/C=C/C[C@H](C)/C=C(C)/[C@@H](O)C2=O)([H])[C@@]3(C([C@@H]4[C@H]2[C@@]([C@]5([H])[C@@H](O)[C@H](/C=C/C=C/C)CO5)([H])C=CC4)=O)[C@@]1([C@H](CC6=CNC7=CC=CC=C67)NC3=O)[H]	Aureochaeglobosin B	No cytotoxic against U937, H1975, K562, MOLT-4, BGC823, MCF-7, Hela, A549, Huh-7, HL60	No anti-tuberculosis activity					Chaetomium	Chaetomium		C/C=C/C=C/[C@@H]1CO[C@@H]([C@H]1O)[C@@H]1C=CC[C@H]2[C@@H]1C(=O)[C@H](O)/C(=C/[C@@H](C)C/C=C/[C@@H]1[C@]3(C2=O)C(=O)N[C@H]([C@@H]3C(=C([C@H]1O)C)C)Cc1c[nH]c2c1cccc2)/C	C45H54N2O7	734.92	54	9	0.49	5	7	5	214.53	148.95	4.66	4.13	5.12	2.52	5.13	4.31	-6.79	1.19e-04	1.62e-07	Poorly soluble	-6.96	7.97e-05	1.08e-07	Poorly soluble	-6.55	2.09e-04	2.84e-07	Poorly soluble	Low	No	Yes	No	No	No	No	No	-7.85
292	C[C@H]1[C@@]([H])([C@H](CC2=CNC3=CC=CC=C23)NC4=O)[C@]4(C(/C=C/C5=O)=O)[C@](/C=C/C[C@H](C)/C=C(C)/[C@H]5O)([H])[C@H](O)[C@]1(C)OC	6-O-Methyl-chaetoglobosin Q							Chaetomium	Chaetomium		CO[C@]1(C)[C@@H](C)[C@H]2[C@@H](NC(=O)[C@]32[C@H]([C@@H]1O)/C=C/C[C@H](C)/C=C(/[C@H](C(=O)/C=C/C3=O)O)\C)Cc1c[nH]c2c1cccc2	C33H40N2O6	560.68	41	9	0.48	3	6	4	161.37	128.72	3.06	3.25	3.06	1.43	3.38	2.84	-5.33	2.63e-03	4.70e-06	Moderately soluble	-5.63	1.32e-03	2.36e-06	Moderately soluble	-6.14	4.06e-04	7.24e-07	Poorly soluble	High	No	Yes	No	No	No	No	Yes	-7.41
293	C[C@H]1[C@@]([H])([C@H](CC2=CNC3=CC=CC=C32)N=C4CC[C@H](O)C5=O)[C@@]46[C@](/C=C/C[C@H](C)/C=C5\C)([H])[C@H](O)[C@]1(OC6=O)C	Pchaeglobolactone A							Chaetomium	Chaetomium	Unique fused ring system	C[C@H]1C/C=C/[C@H]2[C@H](O)[C@@]3(C)OC(=O)[C@]42C(=N[C@H]([C@@H]4[C@@H]3C)Cc2c[nH]c3c2cccc3)CC[C@@H](C(=O)/C(=C/1)/C)O	C32H38N2O5	530.65	39	9	0.53	2	6	3	155.02	111.98	3.11	3.88	3.95	2.51	4.67	3.62	-5.61	1.29e-03	2.44e-06	Moderately soluble	-5.93	6.25e-04	1.18e-06	Moderately soluble	-6.34	2.40e-04	4.53e-07	Poorly soluble	High	No	Yes	No	No	No	No	Yes	-6.78
294	C[C@H](/C=C(C)/[C@H]1O)C/C=C/[C@@]2([C@@H](C(OC)=O)CC1=O)C([C@H](C)[C@@H](C)[C@]([C@H](CC3=CNC4=CC=CC=C43)N5)([H])C2C5=O)=O	Spiropchaeglobosin A							Chaetomium	Chaetomium	Unique fused ring system	COC(=O)[C@H]1CC(=O)[C@H](O)/C(=C/[C@H](C/C=C/[C@@]21C(=O)[C@H](C)[C@H]([C@@H]1C2C(=O)N[C@H]1Cc1c[nH]c2c1cccc2)C)C)/C	C33H40N2O6	560.68	41	9	0.52	4	6	3	160.85	125.56	3.13	3.54	3.55	2.24	4.00	3.29	-5.44	2.01e-03	3.59e-06	Moderately soluble	-5.86	7.71e-04	1.38e-06	Moderately soluble	-6.63	1.30e-04	2.32e-07	Poorly soluble	High	No	Yes	No	No	No	No	Yes	-7.21
295	O=C1[C@@]23[C@@]([C@H](CC4=CNC5=CC=CC=C54)NC3=O)([H])[C@H](C)[C@](C)(C=O)[C@@H]2/C=C/C[C@H](C)/C=C(C)/C([C@@H](O)CC1)=O	Pchaeglobosals A							Chaetomium	Chaetomium	Unique fused ring system	O=C[C@@]1(C)[C@@H](C)[C@@H]2[C@]3([C@H]1/C=C/C[C@H](C)/C=C(/C(=O)[C@H](CCC3=O)O)\C)C(=O)N[C@H]2Cc1c[nH]c2c1cccc2	C32H38N2O5	530.65	39	9	0.50	3	5	3	154.69	116.33	2.93	3.84	3.72	2.03	4.59	3.42	-5.52	1.60e-03	3.01e-06	Moderately soluble	-5.98	5.57e-04	1.05e-06	Moderately soluble	-6.99	5.39e-05	1.02e-07	Poorly soluble	High	No	Yes	No	No	No	No	Yes	-6.81
296	O=C1[C@@]23[C@@]([C@H](CC4=CNC5=CC=CC=C54)NC3=O)([H])[C@H](C)[C@](C)(C=O)[C@@H]2/C=C/C[C@H](C)/C=C(C)/[C@@H](O)C(/C=C/1)=O	Pchaeglobosals B	Potent cytotoxicity against A549, HepG2, MCF-7, CT26, HT29 between 1.04 to 9.90; apoptosis-inducing and cell cycle arrest activities in HT26 and CT29						Chaetomium	Chaetomium	Unique fused ring system	O=C[C@@]1(C)[C@@H](C)[C@@H]2[C@]3([C@H]1/C=C/C[C@H](C)/C=C(/[C@H](C(=O)/C=C/C3=O)O)\C)C(=O)N[C@H]2Cc1c[nH]c2c1cccc2	C32H36N2O5	528.64	39	9	0.44	3	5	3	154.22	116.33	3.05	3.59	3.50	1.96	4.19	3.26	-5.35	2.35e-03	4.45e-06	Moderately soluble	-5.72	1.01e-03	1.91e-06	Moderately soluble	-6.53	1.57e-04	2.97e-07	Poorly soluble	High	No	Yes	No	No	No	No	Yes	-6.98
297	C[C@H]1[C@@]([H])([C@H](CC2=CNC3=CC=CC=C23)NC4=O)[C@]4(C(CCC(O)=O)=O)[C@](/C=C/C[C@H](C)/C=C(C)/C=O)([H])[C@H](O)C1=C	Salchaetoglobosins A	Mild cytotoxic effect against PC-3 of 62.21			No anti-inflammatory abilities			Chaetomium	Chaetomium	19,20-seco-chaetoglobosins	O=C/C(=C/[C@H](C/C=C/[C@H]1[C@H](O)C(=C)[C@H]([C@@H]2[C@@]1(C(=O)CCC(=O)O)C(=O)N[C@H]2Cc1c[nH]c2c1cccc2)C)C)/C	C32H38N2O6	546.65	40	9	0.44	11	6	4	158.17	136.56	2.81	2.79	3.78	1.99	5.71	3.41	-4.43	2.04e-02	3.74e-05	Moderately soluble	-5.31	2.65e-03	4.85e-06	Moderately soluble	-6.14	4.00e-04	7.31e-07	Poorly soluble	Low	No	Yes	No	No	No	No	Yes	-7.65
298	CC1=C(C)[C@@H](O)[C@@](/C=C/C[C@H](C)/C=C(C)/C=O)([H])[C@@]2(C(CCC(O)=O)=O)[C@@]1([C@H](CC3=CNC4=CC=CC=C34)NC2=O)[H]	Salchaetoglobosins B				No anti-inflammatory abilities			Chaetomium	Chaetomium	19,20-seco-chaetoglobosins	O=C/C(=C/[C@H](C/C=C/[C@H]1[C@H](O)C(=C([C@@H]2[C@@]1(C(=O)CCC(=O)O)C(=O)N[C@H]2Cc1c[nH]c2c1cccc2)C)C)C)/C	C32H38N2O6	546.65	40	9	0.44	11	6	4	158.17	136.56	2.90	2.22	3.92	1.99	5.82	3.37	-4.07	4.67e-02	8.54e-05	Moderately soluble	-4.72	1.04e-02	1.89e-05	Moderately soluble	-6.34	2.51e-04	4.59e-07	Poorly soluble	Low	No	Yes	No	No	No	No	Yes	-8.06
299	C[C@H]1[C@@]([H])([C@H](CC2=CNC3=CC=CC=C23)NC4=O)C4(C(C5[C@@H](C([C@@H]6O)=O)[C@@]([C@@]7([H])OC[C@@H](/C=C/C=C/C)[C@@H]7O)([H])C=CC5)=O)[C@](/C=C/C[C@H](C)/C=C6\C)([H])[C@H]8[C@]1(C)O8	Aureochaeglobosin A		Weak to potent antimicrobial effect against Bacillus subtilis, Salmonella typhimurium, and Staphylococcus aureus between 4 and 512					Chaetomium	Chaetomium		C/C=C/C=C/[C@@H]1CO[C@@H]([C@H]1O)[C@@H]1C=CCC2[C@H]1C(=O)[C@H](O)/C(=C/[C@@H](C)C/C=C/[C@@H]1C3(C2=O)C(=O)N[C@H]([C@@H]3[C@@H]([C@@]2([C@H]1O2)C)C)Cc1c[nH]c2c1cccc2)/C	C45H54N2O7	734.92	54	9	0.53	5	7	4	212.85	141.25	4.05	5.23	5.21	2.59	5.45	4.51	-7.48	2.41e-05	3.28e-08	Poorly soluble	-7.94	8.35e-06	1.14e-08	Poorly soluble	-6.64	1.67e-04	2.28e-07	Poorly soluble	Low	No	Yes	No	No	No	No	No	-7.07
300	C[C@H]1[C@@]([H])([C@H](CC2=CNC3=CC=CC=C23)NC4=O)[C@]4(C(CC[C@H](O)C5=O)=O)[C@](/C=C/C[C@H](C)/C=C5\C)([H])C=C1C	Armochaetoglobosin G	Cytotoxicity against Hela between 3.7 and 39.1; weak to moderate cytotoxic effect against A549 between 7.3 and 32.3						Chaetomium	Chaetomium		C[C@H]1C/C=C/[C@H]2C=C(C)[C@H]([C@@H]3[C@]2(C(=O)N[C@H]3Cc2c[nH]c3c2cccc3)C(=O)CC[C@@H](C(=O)/C(=C/1)/C)O)C	C32H38N2O4	514.66	38	9	0.47	2	4	3	154.28	99.26	3.17	4.55	4.46	2.83	4.60	3.92	-5.94	5.90e-04	1.15e-06	Moderately soluble	-6.36	2.26e-04	4.39e-07	Poorly soluble	-7.10	4.05e-05	7.87e-08	Poorly soluble	High	No	Yes	No	No	Yes	No	Yes	-6.21
301	C[C@H]1[C@@]([H])([C@H](CC2=CNC3=CC=CC=C23)NC4=O)[C@]4(C(CC[C@H](O)C/C(C)=C/[C@@H](C)C/C=C/5)=O)[C@]5([H])C=C1C	Penochalasin J	Cytotoxicity against Hela between 3.7 and 39.1; weak to moderate cytotoxic effect against A549 between 7.3 and 32.3						Chaetomium	Chaetomium		O[C@H]1CCC(=O)[C@]23C(=O)N[C@H]([C@@H]3[C@@H](C(=C[C@@H]2/C=C/C[C@@H](/C=C(/C1)\C)C)C)C)Cc1c[nH]c2c1cccc2	C32H40N2O3	500.67	37	9	0.50	2	3	3	154.08	82.19	4.04	4.87	5.29	3.72	4.91	4.56	-6.06	4.36e-04	8.70e-07	Poorly soluble	-6.33	2.34e-04	4.67e-07	Poorly soluble	-7.23	2.93e-05	5.86e-08	Poorly soluble	High	No	Yes	No	No	No	No	Yes	-5.90
302	C[C@H]1[C@@]([H])([C@H](CC2=CNC3=CC=CC=C23)NC4=O)[C@]4(C5=O)[C@](/C=C/C[C@H](C)/C=C(C)/[C@@H]6[C@H]5CC(O6)=O)([H])[C@H](O7)[C@@]17C	Phychaetoglobins A	No cytotoxic against Hela; no cytotoxic against A549						Chaetomium	Chaetomium		O=C1C[C@@H]2[C@H](O1)/C(=C/[C@@H](C)C/C=C/[C@@H]1[C@]3(C2=O)C(=O)N[C@H]([C@@H]3[C@H](C)[C@@]2([C@H]1O2)C)Cc1c[nH]c2c1cccc2)/C	C32H36N2O5	528.64	39	9	0.53	2	5	2	151.57	100.79	4.04	4.87	3.90	3.72	4.91	4.56	-6.06	4.36e-04	8.70e-07	Poorly soluble	-6.33	2.34e-04	4.67e-07	Poorly soluble	-7.23	2.93e-05	5.86e-08	Poorly soluble	High	No	Yes	No	No	No	No	Yes	-5.90
303	C[C@H]1[C@@]([H])([C@H](CC2=CNC3=CC=CC=C23)NC4=O)[C@]4(C(/C=C/C[C@H](O)CC[C@@H](C)C/C=C/5)=O)[C@]5([H])C=C1C	Phychaetoglobins B	Cytotoxicity against Hela 3.7 and 39.1; no cytotoxic against A549						Chaetomium	Chaetomium		C[C@H]1C/C=C/[C@H]2C=C(C)[C@H]([C@@H]3[C@]2(C(=O)N[C@H]3Cc2c[nH]c3c2cccc3)C(=O)/C=C/C[C@@H](CC1)O)C	C31H38N2O3	486.65	36	9	0.48	2	3	3	149.27	82.19	3.53	5.25	4.90	3.53	4.40	4.32	-6.22	2.95e-04	6.06e-07	Poorly soluble	-6.73	9.16e-05	1.88e-07	Poorly soluble	-6.64	1.11e-04	2.29e-07	Poorly soluble	High	No	Yes	No	No	Yes	No	Yes	-5.54
304	C[C@H]1[C@@]([H])([C@H](CC2=CNC3=CC=CC=C23)NC4=O)[C@]4(C(CCC5=O)=O)[C@](/C=C/C[C@H](C)/C=C(C)/C5=O)([H])[C@H](OC(C)=O)[C@]1(C)O	Phychaetoglobins C	Cytotoxicity against Hela between 3.7 and 39.1; weak to moderate cytotoxic effect against A549 between 7.3 and 32.3						Chaetomium	Chaetomium		CC(=O)O[C@H]1[C@@H]2/C=C/C[C@H](C)/C=C(/C(=O)C(=O)CCC(=O)[C@@]32C(=O)N[C@H]([C@@H]3[C@@H]([C@@]1(C)O)C)Cc1c[nH]c2c1cccc2)\C	C34H40N2O7	588.69	43	9	0.50	4	7	3	165.89	142.63	3.20	3.29	3.41	1.58	4.33	3.16	-5.45	2.07e-03	3.52e-06	Moderately soluble	-5.96	6.45e-04	1.10e-06	Moderately soluble	-7.22	3.58e-05	6.08e-08	Poorly soluble	Low	No	Yes	No	No	No	No	Yes	-7.56
305	CC1=C(C)[C@@H](O)[C@@](/C=C/C[C@H](C)[C@]2([H])C(C)=C3)([H])[C@@]4(C(C[C@]2([H])C3=O)=O)[C@@]1([C@H](CC5=CNC6=CC=CC=C56)NC4=O)[H]	Phychaetoglobins D	Cytotoxicity against Hela between 3.7 and 39.1; weak to moderate cytotoxic effect against A549 between 7.3 and 32.3						Chaetomium	Chaetomium		O=C1C=C([C@@H]2[C@@H]1CC(=O)[C@@]13C(=O)N[C@H]([C@@H]1C(=C([C@H]([C@@H]3/C=C/C[C@@H]2C)O)C)C)Cc1c[nH]c2c1cccc2)C	C32H36N2O4	512.64	38	9	0.47	2	4	3	152.17	99.26	3.57	2.66	4.07	2.83	4.59	3.55	-4.74	9.38e-03	1.83e-05	Moderately soluble	-4.40	2.06e-02	4.02e-05	Moderately soluble	-7.09	4.19e-05	8.17e-08	Poorly soluble	High	No	Yes	No	No	No	No	Yes	-7.54
306	CC1=C(C)[C@@H](O)[C@@](/C=C/C[C@H](C)/C=C(C)/[C@@H](O)C2NN=C3C=C2O)([H])[C@@]43[C@@]1([C@H](CC5=CNC6=CC=CC=C56)NC4=O)[H]	Chaetoglobosins B1							Chaetomium	Chaetomium		C[C@H]1C/C=C/[C@H]2[C@H](O)C(=C([C@@H]3[C@]2(C(=O)N[C@H]3Cc2c[nH]c3c2cccc3)C2=NNC([C@@H](/C(=C/1)/C)O)C(=C2)O)C)C	C32H38N4O4	542.67	40	9	0.44	2	5	6	167.75	129.97	3.57	2.66	2.67	2.83	4.59	3.55	-4.74	9.38e-03	1.83e-05	Moderately soluble	-4.40	2.06e-02	4.02e-05	Moderately soluble	-7.09	4.19e-05	8.17e-08	Poorly soluble	High	No	Yes	No	No	No	No	Yes	-7.54
307	CC1=C(C)[C@@H](O)[C@@](CCC[C@H](C)C[C@@H](C)[C@@H](O)C2=NN=C3C=C2)([H])[C@@]43[C@@]1([C@H](CC5=CNC6=CC=CC=C56)NC4=O)[H]	Chaetoglobosins B2	No cytotoxic against A549, HCC827, SW620, MDA-MB-231						Chaetomium	Chaetomium		C[C@H]1CCC[C@H]2[C@H](O)C(=C([C@@H]3[C@]2(C(=O)N[C@H]3Cc2c[nH]c3c2cccc3)c2ccc([C@@H]([C@@H](C1)C)O)nn2)C)C	C32H40N4O3	528.68	39	15	0.53	2	5	4	157.14	111.13	3.43	3.14	4.05	2.92	4.35	3.58	-5.25	2.98e-03	5.64e-06	Moderately soluble	-5.14	3.80e-03	7.19e-06	Moderately soluble	-8.10	4.23e-06	8.00e-09	Poorly soluble	High	No	Yes	Yes	No	No	No	No	-7.30
308	CC1=C(C)[C@@H](O)[C@@](/C=C/C[C@H](C)/C=C(C)/[C@@H]2/C(N=NO2)=C3C=C4ON=N\3)([H])[C@@]54[C@@]1([C@H](CC6=CNC7=CC=CC=C67)NC5=O)[H]	Chaetoglobosins B3	No cytotoxic against A549, HCC827, SW620, MDA-MB-231						Chaetomium	Chaetomium		C[C@H]1C/C=C/[C@H]2[C@H](O)C(=C([C@@H]3[C@]2(C(=O)N[C@H]3Cc2c[nH]c3c2cccc3)C2=C/C(=C/3\[C@@H](/C(=C/1)/C)ON=N3)/N=NO2)C)C	C32H34N6O4	566.65	42	9	0.41	2	8	3	173.89	133.02	3.87	4.25	4.04	2.81	4.88	3.97	-6.06	4.97e-04	8.76e-07	Poorly soluble	-6.75	9.96e-05	1.76e-07	Poorly soluble	-6.86	7.75e-05	1.37e-07	Poorly soluble	Low	No	Yes	No	No	No	No	No	-6.74
309	C[C@H]1[C@@]([H])([C@H](CC2=CNC3=CC=CC=C23)NC4=O)[C@]4(C(CC[C@H](O)C5=O)=O)[C@](/C=C/C[C@H](C)/C=C5\C)([H])[C@H](O)[C@]1(C)OC	Rubichaetoglobin A		No antibacterial activity against S. aureus, B. subtilis, and E. faecalis					Chaetomium	Chaetomium		CO[C@]1(C)[C@@H](C)[C@H]2[C@@H](NC(=O)[C@]32[C@H]([C@@H]1O)/C=C/C[C@H](C)/C=C(/C(=O)[C@H](CCC3=O)O)\C)Cc1c[nH]c2c1cccc2	C33H42N2O6	562.70	41	9	0.55	3	6	4	161.85	128.72	3.07	3.50	3.28	1.50	3.78	3.03	-5.50	1.79e-03	3.18e-06	Moderately soluble	-5.89	7.31e-04	1.30e-06	Moderately soluble	-6.61	1.39e-04	2.48e-07	Poorly soluble	High	No	Yes	No	No	No	No	Yes	-7.25
310	C[C@H]1[C@@]([H])([C@H](CC2=CNC3=CC=CC=C23)NC4=O)[C@]4(C(CCC(OC)=O)=O)[C@](/C=C/C[C@H](C)/C=C(C)/C=O)([H])C([C@H]1C)=O	Armochaetoglasins L		No antibacterial activity against K. pneumonia, E. coli and S. aureus		Anti-inflammatory activity against NO production of 7.06			Chaetomium	Chaetomium		COC(=O)CCC(=O)[C@@]12C(=O)N[C@H]([C@@H]1[C@H](C)[C@@H](C(=O)[C@@H]2/C=C/C[C@@H](/C=C(/C=O)\C)C)C)Cc1c[nH]c2c1cccc2	C33H40N2O6	560.68	41	9	0.48	12	6	2	162.00	122.40	3.81	3.90	4.15	2.17	6.59	4.12	-5.14	4.03e-03	7.18e-06	Moderately soluble	-6.17	3.80e-04	6.78e-07	Poorly soluble	-7.29	2.90e-05	5.18e-08	Poorly soluble	High	No	Yes	No	No	Yes	No	Yes	-6.95
311	C[C@H]1[C@@]([H])([C@H](CC2=CNC3=CC=CC=C23)NC4=O)[C@]4(C(CCC5=O)=O)[C@](/C=C/C[C@H](C)/C=C(C)/C5)([H])[C@H](O6)[C@@]16C	Armochaetoglasins M		No antibacterial activity against K. pneumonia, E. coli and S. aureus		Anti-inflammatory activity against NO production of 9.97			Chaetomium	Chaetomium		O=C1CCC(=O)[C@@]23C(=O)N[C@H]([C@@H]2[C@H](C)[C@@]2([C@H]([C@@H]3/C=C/C[C@@H](/C=C(/C1)\C)C)O2)C)Cc1c[nH]c2c1cccc2	C32H38N2O4	514.66	38	9	0.53	2	4	2	152.60	91.56	3.61	3.92	4.70	2.91	5.33	4.09	-5.54	1.47e-03	2.86e-06	Moderately soluble	-5.54	1.48e-03	2.87e-06	Moderately soluble	-7.65	1.15e-05	2.24e-08	Poorly soluble	High	No	Yes	No	No	No	No	Yes	-6.66
317	O=C1[C@@]23[C@]([H])([C@@]([C@@H](O)C4=CC=CC=C4)([H])NC3=O)[C@H](C)C(C)=C[C@]2([H])[C@@]5([H])[C@@]1([H])[C@@]6(O)[C@@H](C)C[C@@H](C)C[C@]5(C)O6	Chamisides B		No antibacterial activity	No anticandidal activity; mild inhibition effect against A. thaliana root elongation				Chaetomium	Chaetomium		C[C@@H]1C[C@H](C)[C@]2(O[C@](C1)(C)[C@@H]1[C@@H]2C(=O)[C@@]23[C@@H]1C=C(C)[C@H]([C@H]3[C@@H](NC2=O)[C@H](c1ccccc1)O)C)O	C29H37NO5	479.61	35	6	0.66	2	5	3	136.46	95.86	3.13	2.72	2.69	2.78	3.23	2.91	-4.52	1.44e-02	3.01e-05	Moderately soluble	-4.39	1.97e-02	4.10e-05	Moderately soluble	-5.23	2.84e-03	5.93e-06	Moderately soluble	High	No	Yes	No	No	No	No	No	-7.29
318	O=C1[C@@]23[C@]([H])([C@@](CC4=CC=CC=C4)([H])NC3=O)[C@H](C)C(C)=C[C@]2([H])[C@@]5([H])[C@@]1([H])[C@@]6(O)[C@@H](C)C[C@@H](C)C[C@]5(C)O6	Chamisides C		No antibacterial activity	No anticandidal activity				Chaetomium	Chaetomium		C[C@@H]1C[C@H](C)[C@]2(O[C@](C1)(C)[C@@H]1[C@@H]2C(=O)[C@@]23[C@@H]1C=C(C)[C@H]([C@H]3[C@@H](NC2=O)Cc1ccccc1)C)O	C29H37NO4	463.61	34	6	0.66	2	4	2	135.30	75.63	3.69	3.84	3.52	3.59	4.01	3.73	-5.13	3.42e-03	7.38e-06	Moderately soluble	-5.12	3.48e-03	7.51e-06	Moderately soluble	-6.17	3.10e-04	6.68e-07	Poorly soluble	High	Yes	Yes	No	No	No	No	No	-6.40
319	O=C1[C@@]23[C@]([H])(/C(NC3=O)=C/C4=CC=CC=C4)[C@H](C)C(C)=C[C@]2([H])[C@@]5([H])[C@@]1([H])[C@@]6(O)[C@@H](C)C[C@@H](C)C[C@]5(C)O6	Chamisides D		No antibacterial activity	No anticandidal activity				Chaetomium	Chaetomium		C[C@@H]1C[C@H](C)[C@]2(O[C@](C1)(C)[C@@H]1[C@@H]2C(=O)[C@@]23[C@@H]1C=C(C)[C@H]([C@H]3/C(=C/c1ccccc1)/NC2=O)C)O	C29H35NO4	461.59	34	6	0.59	1	4	2	135.62	75.63	3.74	3.60	3.84	3.51	4.11	3.76	-5.03	4.26e-03	9.24e-06	Moderately soluble	-4.88	6.15e-03	1.33e-05	Moderately soluble	-6.03	4.28e-04	9.27e-07	Poorly soluble	High	Yes	Yes	No	No	No	No	No	-6.56
320	O=C([C@]12[C@@]3([H])[C@H](C)C(C)=C[C@]1([H])[C@]4([H])[C@]([C@](O)(O5)[C@@H](C)C[C@@]5(C)CC4=C)([H])C2=O)N(C)C([C@H]3C6=CC=CC=C6)=O	Chamisides E		No antibacterial activity	No anticandidal activity				Chaetomium	Chaetomium		CC1=C[C@@H]2[C@H]3C(=C)C[C@]4(O[C@]([C@H]3C(=O)[C@]32[C@@H]([C@@H]1C)[C@H](c1ccccc1)C(=O)N(C3=O)C)(O)[C@H](C4)C)C	C30H35NO5	489.60	36	6	0.57	1	5	1	139.92	83.91	3.82	2.78	3.48	3.63	3.77	3.50	-4.68	1.01e-02	2.07e-05	Moderately soluble	-4.20	3.10e-02	6.34e-05	Moderately soluble	-5.81	7.55e-04	1.54e-06	Moderately soluble	High	No	Yes	No	No	No	No	No	-7.31
321	O=C([C@]12[C@@]3([H])[C@H](C)C(C)=C[C@@]1(O)[C@]([C@](O)(C)C[C@H](C)C[C@@H](C)C(O)=O)([H])C([H])C2=O)N(C)C([C@H]3C4=CC=CC=C4)=O	Chamisides F		No antibacterial activity	No anticandidal activity				Chaetomium	Chaetomium		C[C@@H](C[C@@]([C@H]1CC(=O)[C@@]23[C@@]1(O)C=C(C)[C@H]([C@H]3[C@@H](C(=O)N(C2=O)C)c1ccccc1)C)(O)C)C[C@H](C(=O)O)C	C30H39NO7	525.63	38	6	0.60	7	7	3	146.48	132.21	2.90	2.74	2.79	2.45	3.58	2.89	-4.48	1.74e-02	3.31e-05	Moderately soluble	-5.17	3.55e-03	6.75e-06	Moderately soluble	-4.83	7.81e-03	1.49e-05	Moderately soluble	High	No	Yes	No	No	No	No	Yes	-7.56
322	O=C([C@]12[C@@]3([H])[C@H](C)C(C)=C[C@@]1(O)[C@@]4([H])[C@]([C@@]5(O)[C@@H](C)C[C@@H](C)C[C@]4(C)O5)([H])C2=O)NC([C@H]3C6=CC=CC=C6)=O	Chaetoconvosins C		No antibacterial activity	No anticandidal activity				Chaetomium	Chaetomium		C[C@@H]1C[C@H](C)[C@]2(O[C@](C1)(C)[C@@H]1[C@@H]2C(=O)[C@@]23[C@@]1(O)C=C(C)[C@H]([C@H]3[C@@H](C(=O)NC2=O)c1ccccc1)C)O	C29H35NO6	493.59	36	6	0.62	1	6	3	136.70	112.93	3.55	2.14	2.33	2.71	3.04	2.75	-4.31	2.44e-02	4.95e-05	Moderately soluble	-4.14	3.55e-02	7.19e-05	Moderately soluble	-5.55	1.39e-03	2.82e-06	Moderately soluble	High	No	Yes	No	No	No	No	No	-7.79
323	O=C([C@]12[C@@]3([H])[C@H](C)C(C)=C[C@]1([H])[C@@]4([H])[C@]([C@@]5(O)[C@@H](C)C[C@@H](C)C[C@]4(C)O5)([H])C2=O)N(C)C([C@H]3C6=CC=CC=C6)=O	Chaetoconvosins D		No antibacterial activity	No anticandidal activity				Chaetomium	Chaetomium		C[C@@H]1C[C@H](C)[C@]2(O[C@](C1)(C)[C@@H]1[C@@H]2C(=O)[C@]23[C@@H]1C=C(C)[C@H]([C@H]2[C@H](c1ccccc1)C(=O)N(C3=O)C)C)O	C30H37NO5	491.62	36	6	0.63	1	5	1	140.40	83.91	3.40	3.41	3.56	3.71	3.50	3.51	-5.09	3.96e-03	8.06e-06	Moderately soluble	-4.85	6.91e-03	1.41e-05	Moderately soluble	-5.58	1.29e-03	2.63e-06	Moderately soluble	High	No	Yes	No	No	No	No	No	-6.88
324	O=C1N[C@@H](CC2=CC=CC=C2)[C@]([C@]31OC4=O)([H])[C@H](C)C(C)=C[C@@H]3/C=C/C[C@H](C)C(/C(C)=C/C4)=O	Arthriniumnins A	No cytotoxicity against K562, A549, Huh-7, H1975, MCF-7, U937, BGC823, HL60, Hela, MOLT-4	No antituberculosis activity					Arthrinium	Arthrinium		O=C1C/C=C(\C)/C(=O)[C@@H](C)C/C=C/[C@@H]2[C@]3(O1)C(=O)N[C@H]([C@@H]3[C@@H](C(=C2)C)C)Cc1ccccc1	C28H33NO4	447.57	33	6	0.46	2	4	1	133.03	72.47	3.54	4.54	3.96	3.57	4.08	3.94	-5.48	1.49e-03	3.33e-06	Moderately soluble	-5.78	7.36e-04	1.64e-06	Moderately soluble	-6.28	2.35e-04	5.26e-07	Poorly soluble	High	Yes	Yes	No	No	Yes	No	Yes	-5.81
325	O=C1N[C@@H](CC2=CC=CC=C2)[C@]([C@]31OC(C[C@@H](O4)[C@]54C)=O)([H])[C@H](C)C(C)=C[C@@H]3/C=C/C[C@H](C)C5=O	Arthriniumnins B	No cytotoxicity against K562, A549, Huh-7, H1975, MCF-7, U937, BGC823, HL60, Hela, MOLT-5	No antituberculosis activity					Arthrinium	Arthrinium		O=C1C[C@H]2O[C@@]2(C)C(=O)[C@@H](C)C/C=C/[C@@H]2[C@]3(O1)C(=O)N[C@H]([C@@H]3[C@@H](C(=C2)C)C)Cc1ccccc1	C28H33NO5	463.57	34	6	0.54	2	5	1	132.51	85.00	3.39	3.62	3.17	2.83	3.92	3.39	-4.99	4.71e-03	1.02e-05	Moderately soluble	-5.09	3.74e-03	8.08e-06	Moderately soluble	-6.00	4.60e-04	9.93e-07	Poorly soluble	High	No	Yes	No	No	No	No	Yes	-6.56
326	O=C1N[C@@H](CC2=CC=CC=C2)[C@]([C@]31OC4=O)([H])[C@H](C)C(C)=C[C@@H]3/C=C/C[C@H](CO)C(/C(C)=C/C4)=O	Arthriniumnins C		No antituberculosis activity					Arthrinium	Arthrinium		OC[C@H]1C/C=C/[C@H]2C=C(C)[C@H]([C@@H]3[C@@]2(OC(=O)C/C=C(/C1=O)\C)C(=O)N[C@H]3Cc1ccccc1)C	C28H33NO5	463.57	34	6	0.46	3	5	2	134.19	92.70	3.16	3.87	2.93	2.76	3.48	3.24	-5.08	3.81e-03	8.23e-06	Moderately soluble	-5.51	1.42e-03	3.06e-06	Moderately soluble	-5.71	9.14e-04	1.97e-06	Moderately soluble	High	No	Yes	No	No	No	No	Yes	-6.38
327	O=C1N[C@@H](CC2=CC=CC=C2)[C@]([C@]31O4)([H])[C@H](C)C([C@@H](O)[C@@H]3/C=C/C[C@H](C)[C@@H](O)[C@@H](C)/C=C/C4=O)=C	Arthriniumnins D	No cytotoxicity against K562, A549, Huh-7, H1975, MCF-7, U937, BGC823, HL60, Hela, MOLT-5	No antituberculosis activity					Arthrinium	Arthrinium		O=C1/C=C/[C@H](C)[C@H](O)[C@@H](C)C/C=C/[C@@H]2[C@]3(O1)C(=O)N[C@H]([C@@H]3[C@@H](C(=C)[C@H]2O)C)Cc1ccccc1	C28H35NO5	465.58	34	6	0.50	2	5	3	135.15	95.86	3.38	2.94	2.58	2.83	2.49	2.85	-4.58	1.23e-02	2.65e-05	Moderately soluble	-4.62	1.13e-02	2.43e-05	Moderately soluble	-4.56	1.29e-02	2.76e-05	Moderately soluble	High	No	Yes	No	No	No	No	Yes	-7.05
328	O=C1N[C@@H](CC2=CC=CC=C2)[C@]([C@]31C4=O)([H])[C@H](C)C(C)=C[C@@H]3/C=C/C[C@H](C)C([C@@H](C)/C=C/4)=O	Ketocytochalasin	No cytotoxicity against K562, A549, Huh-7, H1975, MCF-7, U937, BGC823, HL60, Hela, MOLT-5	No antituberculosis activity					Arthrinium	Arthrinium		CC1=C[C@@H]2/C=C/C[C@H](C)C(=O)[C@H](/C=C/C(=O)[C@]32[C@@H]([C@@H]1C)[C@H](Cc1ccccc1)NC3=O)C	C28H33NO3	431.57	32	6	0.46	2	3	1	131.65	63.24	3.48	4.76	4.09	3.59	4.10	4.00	-5.52	1.30e-03	3.01e-06	Moderately soluble	-5.82	6.55e-04	1.52e-06	Moderately soluble	-6.10	3.40e-04	7.87e-07	Poorly soluble	High	Yes	No	No	No	Yes	No	Yes	-5.55
329	O=C1N[C@@H](CC2=CC=CC=C2)[C@]([C@]31OC4=O)([H])C(C)=C(C)[C@@H](O)[C@@H]3/C=C/C[C@H](C)C([C@@](O)(C)/C=C/O4)=O	Cytochalasin K	Weak cytotoxicity against K562, A549, Huh-7, H1975, HL60, Hela, MOLT-4 between 10.5 to 47.4	No antituberculosis activity					Arthrinium	Arthrinium		O=C1O/C=C/[C@@](C)(O)C(=O)[C@H](C/C=C/[C@@H]2[C@]3(O1)C(=O)N[C@H]([C@@H]3C(=C([C@H]2O)C)C)Cc1ccccc1)C	C28H33NO7	495.56	36	6	0.46	2	7	3	136.87	122.16	2.42	2.41	2.61	1.58	2.28	2.26	-4.42	1.87e-02	3.78e-05	Moderately soluble	-4.62	1.20e-02	2.41e-05	Moderately soluble	-4.81	7.71e-03	1.56e-05	Moderately soluble	High	No	Yes	No	No	No	No	Yes	-7.61
330	O=C1N[C@@H](CC2=CC=CC=C2)[C@]([C@]31OC4=O)([H])[C@H](C)C(C)=C[C@@H]3/C=C/C[C@H](C)C([C@@H](C)/C=C/O4)=O	Cytocalasin Z16	No cytotoxicity against K562, A549, Huh-7, H1975, MCF-7, U937, BGC823, HL60, Hela, MOLT-5	No antituberculosis activity					Arthrinium	Arthrinium		O=C1O/C=C/[C@H](C)C(=O)[C@H](C/C=C/[C@@H]2[C@]3(O1)C(=O)N[C@H]([C@@H]3[C@@H](C(=C2)C)C)Cc1ccccc1)C	C28H33NO5	463.57	34	6	0.46	2	5	1	134.50	81.70	3.27	5.04	4.38	3.16	3.28	3.83	-5.89	6.00e-04	1.29e-06	Moderately soluble	-6.50	1.48e-04	3.18e-07	Poorly soluble	-5.55	1.29e-03	2.79e-06	Moderately soluble	High	No	Yes	No	No	Yes	No	Yes	-5.55
331	O=C1N[C@@H](CC2=CC=CC=C2)[C@]([C@]31OC4=O)([H])[C@H](C)C([C@@H](O)[C@@H]3/C=C/C[C@H](C)C([C@@H](C)/C=C/4)=O)=C	10-Phenyl-[12]-cytochalasin Z16	Mild cytotoxic effect against K562, A549, H1975, HL60, Hela, MOLT-4 between 1.1 and 18.8	No antituberculosis activity					Arthrinium	Arthrinium		O=C1/C=C/[C@H](C)C(=O)[C@@H](C)C/C=C/[C@@H]2[C@]3(O1)C(=O)N[C@H]([C@@H]3[C@@H](C(=C)[C@H]2O)C)Cc1ccccc1	C28H33NO5	463.57	34	6	0.46	2	5	2	134.19	92.70	3.00	2.96	2.79	2.76	3.08	2.92	-4.58	1.23e-02	2.65e-05	Moderately soluble	-4.57	1.25e-02	2.69e-05	Moderately soluble	-5.26	2.57e-03	5.55e-06	Moderately soluble	High	No	Yes	No	No	No	No	Yes	-7.03
332	O=C1N[C@@H](CC2=CC=CC=C2)[C@]([C@]31OC4=O)([H])C(C)=C(C)[C@@H](O)[C@@H]3/C=C/C[C@H](C)C(/C(C)=C/C4)=O	Cytotochalasin Z17	No cytotoxicity against K562, A549, Huh-7, H1975, MCF-7, U937, BGC823, HL60, Hela, MOLT-5	No antituberculosis activity					Arthrinium	Arthrinium		O=C1C/C=C(\C)/C(=O)[C@@H](C)C/C=C/[C@@H]2[C@]3(O1)C(=O)N[C@H]([C@@H]3C(=C([C@H]2O)C)C)Cc1ccccc1	C28H33NO5	463.57	34	6	0.46	2	5	2	134.19	92.70	3.35	2.85	3.07	2.76	3.58	3.12	-4.51	1.44e-02	3.10e-05	Moderately soluble	-4.46	1.62e-02	3.50e-05	Moderately soluble	-5.91	5.74e-04	1.24e-06	Moderately soluble	High	No	Yes	No	No	No	No	Yes	-7.10
333	O=C1C[C@@H](OC)[C@H](C)C([C@@H](C)C/C=C/[C@H]2C=C(C)[C@@H](C)[C@]([C@H](CC3=CC=CC=C3)N4)([H])[C@@]21C4=O)=O	Arundisins A	Weak to potent cytotoxicity against HL-60, A549, SMMC-7721, MCF-7, SW480 between 9.59 to 30.31						Arthrinium	Arthrinium		CO[C@@H]1CC(=O)[C@]23C(=O)N[C@H]([C@@H]3[C@@H](C(=C[C@@H]2/C=C/C[C@@H](C(=O)[C@H]1C)C)C)C)Cc1ccccc1	C29H37NO4	463.61	34	6	0.55	3	4	1	138.01	72.47	3.78	4.12	3.94	3.03	4.16	3.81	-5.24	2.65e-03	5.72e-06	Moderately soluble	-5.35	2.08e-03	4.48e-06	Moderately soluble	-6.44	1.69e-04	3.65e-07	Poorly soluble	High	Yes	Yes	No	No	No	No	Yes	-6.20
334	O=C1N[C@@H](CC2=CC=CC=C2)[C@]3([H])[C@H](C)C(C)=C[C@@H]4/C=C/C[C@H](C)C([C@@H](C)CCC(O[C@@]341)=O)=O	Arundisins B	Weak to potent cytotoxicity against HL-60, A549, SMMC-7721, MCF-7, SW480 between 9.59 to 30.32						Arthrinium	Arthrinium		O=C1CC[C@H](C)C(=O)[C@@H](C)C/C=C/[C@@H]2[C@]3(O1)C(=O)N[C@H]([C@@H]3[C@@H](C(=C2)C)C)Cc1ccccc1	C28H35NO4	449.58	33	6	0.54	2	4	1	133.50	72.47	3.72	4.53	4.04	3.65	4.10	4.01	-5.48	1.48e-03	3.28e-06	Moderately soluble	-5.77	7.57e-04	1.68e-06	Moderately soluble	-6.29	2.28e-04	5.07e-07	Poorly soluble	High	Yes	Yes	No	No	No	No	Yes	-5.83
335	O=C1N[C@@H](CC2=CC=CC=C2)[C@]3([H])[C@H](C)C(C)=C[C@@H]4/C=C/C[C@H](C)[C@H](O)/C(C)=C\CC(O[C@@]341)=O	Arundisins C	Weak to potent cytotoxicity against HL-60, A549, SMMC-7721, MCF-7, SW480 between 9.59 to 30.33						Arthrinium	Arthrinium		O=C1C/C=C(/C)\[C@@H](O)[C@@H](C)C/C=C/[C@@H]2[C@]3(O1)C(=O)N[C@H]([C@@H]3[C@@H](C(=C2)C)C)Cc1ccccc1	C28H35NO4	449.58	33	6	0.50	2	4	2	133.99	75.63	4.08	4.04	3.75	3.65	3.50	3.80	-5.18	3.00e-03	6.68e-06	Moderately soluble	-5.33	2.09e-03	4.66e-06	Moderately soluble	-5.58	1.17e-03	2.61e-06	Moderately soluble	High	Yes	Yes	No	No	No	No	Yes	-6.17
336	O=C1N[C@@H](CC2=CC=CC=C2)[C@]3([H])[C@H](C)C(C)=C[C@@H]4/C=C/C[C@H](C)[C@H](O)[C@@]5(C)[C@H](O5)CC(O[C@@]341)=O	Arundisins D	No cytotoxicity against HL-60, A549, SMMC-7721, MCF-7, SW480	Weak antimicrobial effect against E. coli and C. albicans of 8					Arthrinium	Arthrinium		O=C1C[C@H]2O[C@@]2(C)[C@@H](O)[C@@H](C)C/C=C/[C@@H]2[C@]3(O1)C(=O)N[C@H]([C@@H]3[C@@H](C(=C2)C)C)Cc1ccccc1	C28H35NO5	465.58	34	6	0.57	2	5	2	133.48	88.16	3.24	3.47	2.96	2.91	3.34	3.18	-4.91	5.71e-03	1.23e-05	Moderately soluble	-5.00	4.62e-03	9.92e-06	Moderately soluble	-5.31	2.30e-03	4.93e-06	Moderately soluble	High	No	Yes	No	No	No	No	Yes	-6.68
337	O=C1N[C@@H](CC2=CC=CC=C2)[C@]3([H])[C@H](C)[C@]4(C)[C@@H](O4)[C@@H]5/C=C/C[C@H](C)[C@H](O)/C(C)=C\CC(O[C@@]351)=O	Arundisins E	Weak to potent cytotoxicity against HL-60, A549, SMMC-7721, MCF-7, SW480 between 9.59 to 30.31						Arthrinium	Arthrinium		O=C1C/C=C(/C)\[C@@H](O)[C@@H](C)C/C=C/[C@@H]2[C@]3(O1)C(=O)N[C@H]([C@@H]3[C@H](C)[C@@]1([C@H]2O1)C)Cc1ccccc1	C28H35NO5	465.58	34	6	0.57	2	5	2	133.48	88.16	3.74	3.45	2.96	2.91	3.34	3.28	-4.90	5.88e-03	1.26e-05	Moderately soluble	-4.98	4.85e-03	1.04e-05	Moderately soluble	-5.31	2.30e-03	4.93e-06	Moderately soluble	High	No	Yes	No	No	No	No	Yes	-6.69
338	O=C1N[C@@H](CC2=CC=CC=C2)[C@]([C@]31O4)([H])[C@H](C)C(C)=C[C@@H]3/C=C/C[C@H](C)C(/C(C)=C\COC4=O)=O	Arundisins F	No cytotoxicity against HL-60, A549, SMMC-7721, MCF-7, SW480	Weak antimicrobial effect against E. coli and C. albicans of 32					Arthrinium	Arthrinium		O=C1OC/C=C(/C)\C(=O)[C@H](C/C=C/[C@@H]2[C@]3(O1)C(=O)N[C@H]([C@@H]3[C@@H](C(=C2)C)C)Cc1ccccc1)C	C28H33NO5	463.57	34	6	0.46	2	5	1	134.50	81.70	3.80	4.85	4.18	3.16	3.67	3.93	-5.77	7.91e-04	1.71e-06	Moderately soluble	-6.30	2.32e-04	5.01e-07	Poorly soluble	-6.00	4.60e-04	9.93e-07	Poorly soluble	High	No	Yes	No	No	Yes	No	Yes	-5.68
339	O=C1N[C@@H](CC2=CC=CC=C2)[C@]([C@]31O)([H])C(C)=C(C)[C@@H](O)[C@@H]3/C=C/C[C@H](C)[C@H]([C@H](O)C)O	Cytochalasin Z12	Weak to potent cytotoxicity against HL-60, A549, SMMC-7721, MCF-7, SW480 between 9.59 to 30.31						Arthrinium	Arthrinium		C[C@H]([C@@H]([C@H](C/C=C/[C@H]1[C@H](O)C(=C([C@@H]2[C@@]1(O)C(=O)N[C@H]2Cc1ccccc1)C)C)C)O)O	C25H35NO5	429.55	31	6	0.56	7	5	5	124.36	110.02	3.15	1.16	1.35	1.58	3.15	2.07	-2.92	5.22e-01	1.22e-03	Soluble	-3.07	3.70e-01	8.60e-04	Soluble	-3.78	7.10e-02	1.65e-04	Soluble	High	No	Yes	No	No	No	No	Yes	-8.10
340	O=C1N[C@@H](CC2=CC=CC=C2)[C@]([C@]31O)([H])[C@H](C)[C@]4(C)[C@@H](O4)[C@@H]3/C=C/C[C@H](C)[C@H]([C@H](O)C)O	Cytochalasin Z21	Weak to potent cytotoxicity against HL-60, A549, SMMC-7721, MCF-7, SW480 between 9.59 to 30.32						Arthrinium	Arthrinium		C[C@H]([C@@H]([C@H](C/C=C/[C@H]1[C@@H]2O[C@]2(C)[C@H]([C@@H]2[C@@]1(O)C(=O)N[C@H]2Cc1ccccc1)C)C)O)O	C25H35NO5	429.55	31	6	0.64	7	5	4	122.68	102.32	2.82	2.26	1.44	1.66	3.49	2.33	-3.61	1.06e-01	2.46e-04	Soluble	-4.05	3.87e-02	9.01e-05	Moderately soluble	-3.88	5.69e-02	1.32e-04	Soluble	High	No	Yes	No	No	No	Yes	Yes	-7.32
341	O=C1N[C@@H](CC2=CC=C(O)C=C2)[C@]([C@]31OC4=O)([H])[C@H](C)C(C)=C[C@@H]3/C=C/C[C@H](C)C(/C(C)=C/C4)=O	Cytochalasins Z24	Weak to mild cytotoxicity against U251, SW-1990, SG7901, MCF-7, Huh-7, HeLa, H460 between 9.33 and 73.21						Eutypella	Other		O=C1C/C=C(\C)/C(=O)[C@@H](C)C/C=C/[C@@H]2[C@]3(O1)C(=O)N[C@H]([C@@H]3[C@@H](C(=C2)C)C)Cc1ccc(cc1)O	C28H33NO5	463.57	34	6	0.46	2	5	2	135.05	92.70	3.27	4.19	3.66	3.03	3.61	3.55	-5.35	2.06e-03	4.44e-06	Moderately soluble	-5.85	6.61e-04	1.43e-06	Moderately soluble	-5.69	9.51e-04	2.05e-06	Moderately soluble	High	No	Yes	No	No	No	No	Yes	-6.15
342	O=C1N[C@@H](CC2=CC=C(O)C=C2)[C@]([C@]31O4)([H])[C@H](C)C(C)=C[C@@H]3/C=C/C[C@H](C)C(O)[C@H](C)/C=C/C4=O	Cytochalasins Z25	Weak selective cytotoxicity against SW-1990 and SG7901 of 50.1 and 50.87, respectively						Eutypella	Other		O=C1/C=C/[C@@H](C)C(O)[C@@H](C)C/C=C/[C@@H]2[C@]3(O1)C(=O)N[C@H]([C@@H]3[C@@H](C(=C2)C)C)Cc1ccc(cc1)O	C28H35NO5	465.58	34	6	0.50	2	5	3	136.02	95.86	3.24	4.36	3.31	3.10	2.62	3.33	-5.47	1.57e-03	3.37e-06	Moderately soluble	-6.09	3.80e-04	8.15e-07	Poorly soluble	-4.54	1.34e-02	2.87e-05	Moderately soluble	High	No	Yes	No	No	No	No	Yes	-6.04
343	O=C1N[C@@H](CC2=CC=C(O)C=C2)[C@]([C@]31OC(O/C=C/[C@H]4C)=O)([H])[C@H](C)C(C)=C[C@@H]3/C=C/C[C@H](C)C4=O	Cytochalasins Z26	No cytotoxicity against U251, SW-1990, SG7901, MCF-7, Huh-7, HeLa, H460						Eutypella	Other		O=C1O/C=C/[C@@H](C)C(=O)[C@H](C/C=C/[C@@H]2[C@]3(O1)C(=O)N[C@H]([C@@H]3[C@@H](C(=C2)C)C)Cc1ccc(cc1)O)C	C28H33NO6	479.56	35	6	0.46	2	6	2	136.53	101.93	3.43	4.69	4.09	2.63	2.80	3.53	-5.76	8.28e-04	1.73e-06	Moderately soluble	-6.56	1.33e-04	2.76e-07	Poorly soluble	-4.96	5.23e-03	1.09e-05	Moderately soluble	High	No	Yes	No	No	No	No	Yes	-5.90
344	O=C1N[C@@H](CC2=CC=C(OC)C=C2)[C@]([C@]31OC(O/C=C/[C@@]4(C)O)=O)([H])[C@H](C)[C@](O)(C)[C@@H](O)[C@@H]3/C=C/C[C@H](C)C4=O	Scoparasin B	Active only against H460 of 3.9						Eutypella	Other		COc1ccc(cc1)C[C@@H]1NC(=O)[C@@]23[C@H]1[C@H](C)[C@@](C)(O)[C@H]([C@@H]3/C=C/C[C@H](C)C(=O)[C@](/C=C/OC(=O)O2)(C)O)O	C29H37NO9	543.61	39	6	0.55	3	9	4	145.03	151.62	2.72	2.49	1.67	0.57	1.49	1.79	-4.69	1.10e-02	2.02e-05	Moderately soluble	-5.32	2.61e-03	4.80e-06	Moderately soluble	-4.09	4.40e-02	8.09e-05	Moderately soluble	Low	No	Yes	No	No	No	No	Yes	-7.85
345	O=C1N[C@@H](CC2=CC=CC=C2)[C@]3([H])C(C)=C(C)[C@@H](O)[C@@](/C=C/C[C@H](C)C[C@](C)(O)CC4)([H])[C@@]31C4=O	[11]-cytochalasa- 5(6),13-diene-1,21-dione-7,18-dihydroxy-16,18-dimethyl-10-phenyl-(7S*,13E,16S*,18R*)		antibacterial					Daldinia	Daldinia		C[C@H]1C/C=C/[C@H]2[C@H](O)C(=C([C@@H]3[C@@]2(C(=O)CC[C@@](C1)(C)O)C(=O)N[C@H]3Cc1ccccc1)C)C	C28H37NO4	451.60	33	6	0.57	2	4	3	134.28	86.63	3.45	2.76	3.36	2.91	3.81	3.26	-4.38	1.88e-02	4.16e-05	Moderately soluble	-4.23	2.63e-02	5.83e-05	Moderately soluble	-5.95	5.03e-04	1.11e-06	Moderately soluble	High	No	Yes	No	No	No	No	Yes	-7.10
346	O=C1N[C@@H](CC2=CC=CC=C2)[C@]([C@]13[C@](/C=C/C[C@H](C)C[C@](C)(O)CCC3=O)([H])[C@@H]4O)([H])[C@@H](C)C4=C	[11]-cytochalasa-6(12),13-diene-1,21-dione-7,18-dihydroxy 16,18-dimethyl-10-phenyl-(7S*,13E,16S*,18R*)	Cytotoxic		antimicrobial				Daldinia	Daldinia		C[C@H]1C/C=C/[C@H]2[C@H](O)C(=C)[C@@H]([C@@H]3[C@@]2(C(=O)CC[C@@](C1)(C)O)C(=O)N[C@H]3Cc1ccccc1)C	C28H37NO4	451.60	33	6	0.57	2	4	3	134.28	86.63	3.30	3.33	3.22	2.91	3.70	3.29	-4.74	8.21e-03	1.82e-05	Moderately soluble	-4.83	6.74e-03	1.49e-05	Moderately soluble	-5.75	8.01e-04	1.77e-06	Moderately soluble	High	No	Yes	No	No	No	No	Yes	-6.69
347	C[C@@H]1C[C@@H](C)/C=C/C([C@@]23[C@@]([C@H](CC4=CC=CC=C4)NC3=O)([H])[C@H](C)C(C)=C[C@]2([H])/C=C/C1)=O	Saccalasin A	Cytotoxic						Daldinia	Daldinia		C[C@H]1C/C=C/[C@H]2C=C(C)[C@H]([C@@H]3[C@@]2(C(=O)/C=C/[C@@H](C1)C)C(=O)N[C@H]3Cc1ccccc1)C	C28H35NO2	417.58	31	6	0.50	2	2	1	131.45	46.17	3.78	5.90	4.91	4.51	4.41	4.70	-6.16	2.91e-04	6.96e-07	Poorly soluble	-6.64	9.50e-05	2.27e-07	Poorly soluble	-6.23	2.46e-04	5.90e-07	Poorly soluble	High	Yes	No	No	No	Yes	No	Yes	-4.66
348	C[C@@H]1C([C@](C)(O)/C=C/C([C@@]23[C@@]([C@H](CC4=CC=CC=C4)NC3=O)([H])[C@H](C)C(C)=C[C@]2([H])/C=C/C1)=O)=O	Saccalasin B	Cytotoxic		antimicrobial				Daldinia	Daldinia		CC1=C[C@@H]2/C=C/C[C@H](C)C(=O)[C@](/C=C/C(=O)[C@]32[C@@H]([C@@H]1C)[C@H](Cc1ccccc1)NC3=O)(C)O	C28H33NO4	447.57	33	6	0.46	2	4	2	132.85	83.47	3.78	5.90	3.20	4.51	4.41	4.70	-6.16	2.91e-04	6.96e-07	Poorly soluble	-6.64	9.50e-05	2.27e-07	Poorly soluble	-6.23	2.46e-04	5.90e-07	Poorly soluble	High	Yes	No	No	No	Yes	No	Yes	-4.66
349	C[C@@H]1[C@@H](O)[C@@H](C)/C=C/C([C@@]23[C@@]([C@H](CC4=CC=CC=C4)NC3=O)([H])[C@H](C)C(C)=C[C@]2([H])/C=C/C1)=O	(16S,17R,18S)-16,18-dimethyl-17-hydroxy-10-phenyl[11]cytochalasa-6,13,19-triene 1,21-dione	Cytotoxic		antimicrobial				Daldinia	Daldinia		CC1=C[C@@H]2/C=C/C[C@H](C)[C@H]([C@H](/C=C/C(=O)[C@]32[C@@H]([C@@H]1C)[C@H](Cc1ccccc1)NC3=O)C)O	C28H35NO3	433.58	32	6	0.50	2	3	2	132.61	66.40	3.78	5.90	3.88	4.51	4.41	4.70	-6.16	2.91e-04	6.96e-07	Poorly soluble	-6.64	9.50e-05	2.27e-07	Poorly soluble	-6.23	2.46e-04	5.90e-07	Poorly soluble	High	Yes	No	No	No	Yes	No	Yes	-4.66
350	C[C@@H](C/C=C/1)C[C@](C)(O)/C=C/C([C@]2([C@@H]1[C@@H]3O)[C@@]([C@H](CC4=CC=CC=C4)NC2=O)([H])[C@H](C)C3=C)=O	C28H35NO4		antibacterial	antimicrobial				Daldinia	Daldinia		C[C@H]1C/C=C/[C@H]2[C@H](O)C(=C)[C@H]([C@@H]3[C@@]2(C(=O)/C=C/[C@@](C1)(C)O)C(=O)N[C@H]3Cc1ccccc1)C	C28H35NO4	449.58	33	6	0.50	2	4	3	133.81	86.63	3.32	3.34	2.99	2.83	3.30	3.16	-4.73	8.29e-03	1.84e-05	Moderately soluble	-4.84	6.55e-03	1.46e-05	Moderately soluble	-5.29	2.33e-03	5.19e-06	Moderately soluble	High	No	Yes	No	No	No	No	Yes	-6.67
351	C[C@@H](C/C=C/1)C[C@@H](C)/C=C/C([C@]2([C@@H]1[C@@H]3O)[C@@]([C@H](CC4=CC=CC=C4)NC2=O)([H])[C@H](C)C3=C)=O	C28H35NO3		antibacterial					Daldinia	Daldinia		C[C@H]1C/C=C/[C@H]2[C@H](O)C(=C)[C@H]([C@@H]3[C@@]2(C(=O)/C=C/[C@@H](C1)C)C(=O)N[C@H]3Cc1ccccc1)C	C28H35NO3	433.58	32	6	0.50	2	3	2	132.61	66.40	3.41	4.12	3.88	3.66	3.80	3.77	-5.13	3.21e-03	7.40e-06	Moderately soluble	-5.22	2.61e-03	6.01e-06	Moderately soluble	-5.66	9.57e-04	2.21e-06	Moderately soluble	High	Yes	Yes	No	No	No	No	Yes	-6.02
352	C[C@@H]1C[C@](C)(O)/C=C/C([C@@]23[C@@]([C@H](CC4=CC=CC=C4)NC3=O)([H])[C@H](C)C(C)=C[C@@H]2/C=C/C1)=O	C28H35NO3		antibacterial					Daldinia	Daldinia		C[C@H]1C/C=C/[C@H]2C=C(C)[C@H]([C@@H]3[C@@]2(C(=O)/C=C/[C@@](C1)(C)O)C(=O)N[C@H]3Cc1ccccc1)C	C28H35NO3	433.58	32	6	0.50	2	3	2	132.65	66.40	3.72	4.46	4.02	3.66	3.91	3.95	-5.34	1.96e-03	4.52e-06	Moderately soluble	-5.57	1.16e-03	2.67e-06	Moderately soluble	-5.86	6.01e-04	1.39e-06	Moderately soluble	High	Yes	Yes	No	No	Yes	No	Yes	-5.78
353	C[C@@H]1C[C@](C)(O)/C=C/C([C@@]23[C@@]([C@H](CC4=CC=CC=C4)NC3=O)([H])[C@H](C)C(CO)=C[C@@H]2/C=C/C1)=O	C28H35NO4		antibacterial					Daldinia	Daldinia		OCC1=C[C@@H]2/C=C/C[C@H](C)C[C@](/C=C/C(=O)[C@]32[C@@H]([C@@H]1C)[C@H](Cc1ccccc1)NC3=O)(C)O	C28H35NO4	449.58	33	6	0.50	3	4	3	133.81	86.63	3.72	4.46	3.00	3.66	3.91	3.95	-5.34	1.96e-03	4.52e-06	Moderately soluble	-5.57	1.16e-03	2.67e-06	Moderately soluble	-5.86	6.01e-04	1.39e-06	Moderately soluble	High	Yes	Yes	No	No	Yes	No	Yes	-5.78
354	O=C1N[C@@H](CC2=CC=CC=C2)[C@]([C@]13[C@](/C=C/C[C@H](C)C[C@](C)(OC(C)=O)[C@H](OC)CC3=O)([H])[C@@H]4O)([H])[C@H](C)C4=C	Daldinin	Cytotoxic						Daldinia	Daldinia		CO[C@@H]1CC(=O)[C@]23C(=O)N[C@H]([C@@H]3[C@@H](C(=C)[C@H]([C@@H]2/C=C/C[C@@H](C[C@]1(C)OC(=O)C)C)O)C)Cc1ccccc1	C31H41NO6	523.66	38	6	0.58	5	6	2	149.91	101.93	2.68	3.47	3.41	2.61	3.88	3.21	-5.06	4.56e-03	8.72e-06	Moderately soluble	-5.29	2.67e-03	5.10e-06	Moderately soluble	-6.22	3.16e-04	6.03e-07	Poorly soluble	High	No	Yes	No	No	No	No	Yes	-7.03
355	O=C1N[C@@H](CC2=CC=CC=C2)[C@]([C@]13[C@](/C=C/C[C@H](C)C[C@](C)(O)[C@H](O)CC3=O)([H])[C@@H]4O)([H])[C@H](C)C4=C	[11]-cytochalasa-6(12),13-diene-1,21-dione-7,18,19-trihy droxy-16,18- dimethyl-10-phenyl-(7S*,13E,16S*,18S*,19R*)	Cytotoxic		antimicrobial				Daldinia	Daldinia		C[C@H]1C/C=C/[C@H]2[C@H](O)C(=C)[C@H]([C@@H]3[C@@]2(C(=O)C[C@H]([C@@](C1)(C)O)O)C(=O)N[C@H]3Cc1ccccc1)C	C28H37NO5	467.60	34	6	0.57	2	5	4	135.45	106.86	3.22	2.36	2.19	2.10	2.81	2.54	-4.22	2.79e-02	5.96e-05	Moderately soluble	-4.24	2.66e-02	5.70e-05	Moderately soluble	-4.93	5.51e-03	1.18e-05	Moderately soluble	High	No	Yes	No	No	No	No	Yes	-7.48
356	C[C@@H]1C[C@](C)(O)/C=C/C([C@@]23[C@@]([C@H](CC4=CC=CC=C4)NC3=O)([H])[C@H](C)[C@]5(C)[C@@H](O5)[C@@H]2/C=C/C1)=O	(7S,13E,16S,18S,19E)16,18-dimethyl-6,7epoxy-18-hydroxy-10-phenyl-[11]-cytochalasa–13,19-diene-1,21-dione							Daldinia	Daldinia		C[C@H]1C/C=C/[C@H]2[C@@H]3O[C@]3(C)[C@H]([C@@H]3[C@@]2(C(=O)/C=C/[C@@](C1)(C)O)C(=O)N[C@H]3Cc1ccccc1)C	C28H35NO4	449.58	33	6	0.57	2	4	2	132.13	78.93	3.61	3.87	3.24	2.91	3.75	3.48	-5.07	3.84e-03	8.55e-06	Moderately soluble	-5.22	2.68e-03	5.96e-06	Moderately soluble	-5.58	1.17e-03	2.61e-06	Moderately soluble	High	Yes	Yes	No	No	No	No	No	-6.29
357	C[C@@H](C/C=C/1)C[C@@H](C)/C=C/C([C@]2([C@@H]1[C@@H]3O)[C@@]([C@H](CC4=CC=C(O)C=C4)NC2=O)([H])[C@H](C)C3=C)=O	Phenochalasin C		antibacterial					Daldinia	Daldinia		C[C@H]1C/C=C/[C@H]2[C@H](O)C(=C)[C@H]([C@@H]3[C@@]2(C(=O)/C=C/[C@@H](C1)C)C(=O)N[C@H]3Cc1ccc(cc1)O)C	C28H35NO4	449.58	33	6	0.50	2	4	3	134.63	86.63	3.44	4.42	3.59	3.10	3.32	3.57	-5.41	1.73e-03	3.85e-06	Moderately soluble	-5.96	4.96e-04	1.10e-06	Moderately soluble	-5.07	3.86e-03	8.59e-06	Moderately soluble	High	No	Yes	No	No	No	No	Yes	-5.90
358	C[C@@H]1C[C@@H](C)/C=C/C([C@@]23[C@@]([C@H](CC4=CC=C(O)C=C4)NC3=O)([H])[C@H](C)C(C)=C[C@@H]2/C=C/C1)=O	Phenochalasin D		antibacterial					Daldinia	Daldinia		C[C@H]1C/C=C/[C@H]2C=C(C)[C@H]([C@@H]3[C@@]2(C(=O)/C=C/[C@@H](C1)C)C(=O)N[C@H]3Cc1ccc(cc1)O)C	C28H35NO3	433.58	32	6	0.50	2	3	2	133.47	66.40	3.33	5.55	4.61	3.93	3.93	4.27	-6.03	4.03e-04	9.30e-07	Poorly soluble	-6.70	8.56e-05	1.97e-07	Poorly soluble	-5.64	9.96e-04	2.30e-06	Moderately soluble	High	Yes	Yes	No	No	Yes	No	Yes	-5.00
359	O=C1N[C@@H](CC2=CC=CC=C2)C3C(C)=C(C)[C@@H](O)C(/C=C/C[C@H](C)C[C@@](C)(O)/C=C/4)[C@@]31C4=O	Fragiformin A			antimicrobial				Hypoxylon	Other		C[C@H]1C/C=C/C2[C@H](O)C(=C(C3[C@@]2(C(=O)/C=C/[C@](C1)(C)O)C(=O)N[C@H]3Cc1ccccc1)C)C	C28H35NO4	449.58	33	6	0.50	2	4	3	133.81	86.63	3.66	2.77	3.14	2.83	3.41	3.16	-4.38	1.90e-02	4.22e-05	Moderately soluble	-4.24	2.56e-02	5.69e-05	Moderately soluble	-5.49	1.46e-03	3.26e-06	Moderately soluble	High	No	Yes	No	No	No	No	Yes	-7.08
360	O=C1N[C@@H](CC2=CC=CC=C2)C([C@]13C(/C=C/C[C@H](C)C[C@@](C)(O)/C=C/C3=O)[C@@H]4O)[C@H](C)C4=C	Fragiformin B			antimicrobial				Hypoxylon	Other		C[C@H]1C/C=C/C2[C@H](O)C(=C)[C@H](C3[C@@]2(C(=O)/C=C/[C@](C1)(C)O)C(=O)N[C@H]3Cc1ccccc1)C	C28H35NO4	449.58	33	6	0.50	2	4	3	133.81	86.63	3.12	3.34	2.99	2.83	3.30	3.12	-4.73	8.29e-03	1.84e-05	Moderately soluble	-4.84	6.55e-03	1.46e-05	Moderately soluble	-5.29	2.33e-03	5.19e-06	Moderately soluble	High	No	Yes	No	No	No	No	Yes	-6.67
361	O=C1N[C@@H](CC2=CC=CC=C2)C([C@]13C(/C=C/C[C@H](C)C[C@H](C)/C=C/[C@H]3OC(C)=O)[C@@H]4O)[C@H](C)C4=C	L-696,474		antibacterial					Hypoxylon	Other		C[C@@H]1/C=C/[C@@H](OC(=O)C)[C@@]23C(=O)N[C@H](C2[C@H](C)C(=C)[C@H](C3/C=C/C[C@@H](C1)C)O)Cc1ccccc1	C30H39NO4	477.63	35	6	0.53	4	4	2	143.31	75.63	3.61	4.82	4.24	4.03	3.71	4.08	-5.70	9.51e-04	1.99e-06	Moderately soluble	-6.14	3.45e-04	7.23e-07	Poorly soluble	-5.57	1.29e-03	2.70e-06	Moderately soluble	High	No	Yes	No	No	No	No	Yes	-5.79
362	O=C1N[C@@H](CC2=CC=CC=C2)C3C(C)=C(C)[C@@H](O)C(/C=C/C[C@H](C)C[C@H](C)/C=C/4)[C@@]31C4=O	Fragiformin C							Hypoxylon	Other		C[C@@H]1/C=C/C(=O)[C@]23C(=O)N[C@H](C3C(=C([C@H](C2/C=C/C[C@@H](C1)C)O)C)C)Cc1ccccc1	C28H35NO3	433.58	32	6	0.50	2	3	2	132.61	66.40	4.18	4.21	4.02	3.66	3.91	4.00	-5.19	2.82e-03	6.50e-06	Moderately soluble	-5.31	2.10e-03	4.85e-06	Moderately soluble	-5.86	6.01e-04	1.39e-06	Moderately soluble	High	Yes	Yes	No	No	Yes	No	Yes	-5.96
363	O=C1N[C@@H](CC2=CC=CC=C2)C3[C@H](C)[C@]4(C)[C@@H](O4)[C@H](/C=C/C[C@H](C)C[C@@](C)(O)/C=C/5)[C@@]31C5=O	Fragiformin D							Hypoxylon	Other		C[C@H]1C/C=C/[C@H]2[C@@H]3O[C@]3(C)[C@H](C3[C@@]2(C(=O)/C=C/[C@](C1)(C)O)C(=O)N[C@H]3Cc1ccccc1)C	C28H35NO4	449.58	33	6	0.57	2	4	2	132.13	78.93	3.77	3.87	3.24	2.91	3.75	3.51	-5.07	3.84e-03	8.55e-06	Moderately soluble	-5.22	2.68e-03	5.96e-06	Moderately soluble	-5.58	1.17e-03	2.61e-06	Moderately soluble	High	Yes	Yes	No	No	No	No	No	-6.29
364	O=C1N[C@@H](CC2=CC=CC=C2)C3C(C)=C(C)[C@@H](O)[C@H](/C=C/C[C@H](C)C([C@](C)(O)/C=C/4)=O)[C@@]31C4=O	Pseudofuscochalasin A							Hypoxylon	Other		CC1=C(C)C2[C@H](Cc3ccccc3)NC(=O)[C@]32[C@H]([C@@H]1O)/C=C/C[C@H](C)C(=O)[C@](/C=C/C3=O)(C)O	C28H33NO5	463.57	34	6	0.46	2	5	3	134.01	103.70	2.62	2.13	2.32	1.95	3.10	2.42	-4.05	4.09e-02	8.82e-05	Moderately soluble	-3.94	5.33e-02	1.15e-04	Soluble	-5.36	2.02e-03	4.36e-06	Moderately soluble	High	No	Yes	No	No	No	No	Yes	-7.62
365	O=C1N[C@@H](CC2=CC=CC=C2)[C@]3([H])C(C)=C(C)[C@@H](O)[C@H](/C=C/C[C@@H]4C)[C@@]31[C@H](OC(C)=O)/C=C/[C@H](C)C4=O	Cytochalasin C	Moderate cytotoxic effect against HCT-15 between 50 and 100 μM						Xylaria	Xylaria		CC(=O)O[C@@H]1/C=C/[C@H](C)C(=O)[C@H](C/C=C/[C@@H]2[C@]31C(=O)N[C@H]([C@@H]3C(=C([C@H]2O)C)C)Cc1ccccc1)C	C30H37NO5	491.62	36	6	0.50	4	5	2	143.51	92.70	3.38	3.11	3.57	3.15	3.52	3.34	-4.71	9.66e-03	1.96e-05	Moderately soluble	-4.73	9.26e-03	1.88e-05	Moderately soluble	-5.64	1.12e-03	2.27e-06	Moderately soluble	High	No	Yes	No	No	No	No	Yes	-7.09
366	O=C1N[C@@H](CC2=CC=CC=C2)[C@]3([H])[C@H](C)C([C@@H](O)[C@H](/C=C/C[C@@H]4C)[C@@]31[C@H](OC(C)=O)/C=C/[C@@](C)(O)C4=O)=C	Cytochalasins D	Selective cytotoxicity against HL-60, A549 SMMC-7721, MCF-7, SW480 from 4.17–37.18; moderate cytotoxic effect against HCT-15 between 50 and 100 μM;						Xylaria	Xylaria		CC(=O)O[C@@H]1/C=C/[C@@](C)(O)C(=O)[C@H](C/C=C/[C@@H]2[C@]31C(=O)N[C@H]([C@@H]3[C@H](C)C(=C)[C@H]2O)Cc1ccccc1)C	C30H37NO6	507.62	37	6	0.50	4	6	3	144.71	112.93	3.21	2.75	2.54	2.35	2.91	2.75	-4.58	1.35e-02	2.66e-05	Moderately soluble	-4.78	8.49e-03	1.67e-05	Moderately soluble	-5.07	4.34e-03	8.55e-06	Moderately soluble	High	No	Yes	No	No	No	No	Yes	-7.44
367	C=C1[C@@H](O)[C@@](/C=C/C[C@@H]2C)([H])[C@@]3([C@H](OC(C)=O)[C@H](O4)[C@H]4[C@@](C)(O)C2=O)[C@@]([C@H](CC5=CC=CC=C5)NC3=O)([H])[C@@H]1C	19,20-Epoxycytochalasin D	Moderate cytotoxic effect against HCT-15 between 50 and 100 μM	Antibacterial	Antifungal				Xylaria	Xylaria		CC(=O)O[C@@H]1[C@@H]2O[C@@H]2[C@@](C)(O)C(=O)[C@H](C/C=C/[C@@H]2[C@]31C(=O)N[C@H]([C@@H]3[C@H](C)C(=C)[C@H]2O)Cc1ccccc1)C	C30H37NO7	523.62	38	6	0.57	4	7	3	144.15	125.46	3.49	1.92	1.75	1.63	2.75	2.31	-4.15	3.72e-02	7.10e-05	Moderately soluble	-4.18	3.47e-02	6.63e-05	Moderately soluble	-4.79	8.49e-03	1.62e-05	Moderately soluble	High	No	Yes	No	No	No	No	Yes	-8.13
368	CC1=C(C)[C@]([C@H](CC2=CC=CC=C2)NC3=O)([H])[C@]3([C@H](OC(C)=O)[C@H](O4)[C@H]4[C@@](C)(O)C5=O)[C@](/C=C/C[C@@H]5C)([H])[C@@H]1O	19,20-Epoxycytochalasin C	Moderate cytotoxic effect against HCT-15 between 50 and 100 μM	Antibacterial	Antifungal				Xylaria	Xylaria		CC(=O)O[C@@H]1[C@@H]2O[C@@H]2[C@@](C)(O)C(=O)[C@H](C/C=C/[C@@H]2[C@]31C(=O)N[C@H]([C@@H]3C(=C([C@H]2O)C)C)Cc1ccccc1)C	C30H37NO7	523.62	38	6	0.57	4	7	3	144.15	125.46	3.50	1.34	1.89	1.63	2.86	2.25	-3.78	8.62e-02	1.65e-04	Soluble	-3.58	1.39e-01	2.65e-04	Soluble	-4.99	5.33e-03	1.02e-05	Moderately soluble	High	No	Yes	No	No	No	No	Yes	-8.54
369	C[C@@H]1[C@@H](O)[C@@](/C=C/C[C@@H]2C)([H])[C@@]3([C@H](OC(C)=O)[C@H](O4)[C@@H]4[C@@](C)(O)C2=O)[C@@]([C@H](CC5=CC=CC=C5)NC3=O)([H])[C@@H]1C	Jammosporin A	Cytotoxic						Rosellinia	Other		CC(=O)O[C@@H]1[C@@H]2O[C@H]2[C@@](C)(O)C(=O)[C@H](C/C=C/[C@@H]2[C@]31C(=O)N[C@H]([C@@H]3[C@H](C)[C@@H]([C@H]2O)C)Cc1ccccc1)C	C30H39NO7	525.63	38	6	0.63	4	7	3	144.63	125.46	3.31	2.68	1.83	1.71	2.48	2.40	-4.64	1.20e-02	2.29e-05	Moderately soluble	-4.97	5.67e-03	1.08e-05	Moderately soluble	-4.56	1.45e-02	2.77e-05	Moderately soluble	High	No	Yes	No	No	No	Yes	Yes	-7.60
370	C[C@@]12[C@]([C@H](CC3=CC=CC=C3)NC4=O)([H])[C@]4([C@H](OC(C)=O)[C@H](O5)[C@@H]5[C@@](C)(O)C6=O)[C@](/C=C/C[C@@H]6C)([H])[C@H](O)[C@]1(C)O2	19,20-epoxycytochalasin N	Cytotoxic	antibacterial					Rosellinia	Other		CC(=O)O[C@@H]1[C@@H]2O[C@H]2[C@@](C)(O)C(=O)[C@H](C/C=C/[C@@H]2[C@]31C(=O)N[C@H]([C@@H]3[C@@]1([C@]([C@H]2O)(O1)C)C)Cc1ccccc1)C	C30H37NO8	539.62	39	6	0.63	4	8	3	143.67	137.99	3.11	1.22	1.10	0.93	2.70	1.81	-3.80	8.47e-02	1.57e-04	Soluble	-3.71	1.04e-01	1.93e-04	Soluble	-4.71	1.04e-02	1.94e-05	Moderately soluble	High	No	Yes	No	No	No	Yes	No	-8.73
371	C[C@H]1[C@]([C@H](CC2=CC=CC=C2)NC3=O)([H])[C@]3([C@H](OC(C)=O)[C@H](O4)[C@@H]4[C@H](C)C5=O)[C@](/C=C/C[C@@H]5C)([H])[C@H]6[C@]1(C)O6	18-deoxy-19,20-epoxycytochalasin Q		antibacterial					Rosellinia	Other		CC(=O)O[C@@H]1[C@@H]2O[C@H]2[C@H](C)C(=O)[C@H](C/C=C/[C@@H]2[C@]31C(=O)N[C@H]([C@@H]3[C@H](C)[C@@]1([C@H]2O1)C)Cc1ccccc1)C	C30H37NO6	507.62	37	6	0.63	4	6	1	141.27	97.53	4.15	3.38	2.87	2.50	3.69	3.32	-4.97	5.41e-03	1.07e-05	Moderately soluble	-5.11	3.97e-03	7.82e-06	Moderately soluble	-5.46	1.75e-03	3.45e-06	Moderately soluble	High	No	Yes	No	No	No	No	No	-7.00
372	CC1=C(C)C(C(CC2=CC=CC=C2)NC3=O)C3(C(OC(C)=O)C(O4)C4C(C)(O)C5=O)C(/C=C/CC5C)C1=O	19,20-epoxycytochalasin C	Cytotoxic						Rosellinia	Other		CC(=O)OC1C2OC2C(C)(O)C(=O)C(C/C=C/C2C31C(=O)NC(C3C(=C(C2=O)C)C)Cc1ccccc1)C	C30H35NO7	521.60	38	6	0.53	4	7	2	143.19	122.30	3.10	2.02	2.10	1.56	3.45	2.45	-4.20	3.30e-02	6.32e-05	Moderately soluble	-4.22	3.17e-02	6.09e-05	Moderately soluble	-5.69	1.07e-03	2.05e-06	Moderately soluble	High	No	Yes	No	No	No	No	Yes	-8.05
373	CC1=C(C)C(C(CC2=CC=CC=C2)NC3=O)C3(CC(O4)C4C(C)(O)C5=O)C(/C=C/CC5C)C1O	deacetyl 19,20-epoxycytochalasin C	Cytotoxic						Rosellinia	Other		CC1=C(C)C2C(Cc3ccccc3)NC(=O)C32C(C1O)/C=C/CC(C)C(=O)C(C1C(C3)O1)(C)O	C28H35NO5	465.58	34	6	0.57	2	5	3	133.25	99.16	3.32	1.74	2.35	2.10	3.25	2.55	-3.82	7.02e-02	1.51e-04	Soluble	-3.44	1.69e-01	3.64e-04	Soluble	-5.21	2.86e-03	6.15e-06	Moderately soluble	High	No	Yes	No	No	No	No	No	-7.90
374	CC1C(C(CC2=CC=CC=C2)NC3=O)C3(C(OC(C)=O)C(O4)C4C(C)(O)C5=O)C(/C=C/CC5C)C(O)C1(O)C	Cytochalasin P1	Cytotoxic						Rosellinia	Other		CC(=O)OC1C2OC2C(C)(O)C(=O)C(C/C=C/C2C31C(=O)NC(C3C(C)C(C2O)(C)O)Cc1ccccc1)C	C30H39NO8	541.63	39	6	0.63	4	8	4	145.83	145.69	2.50	1.45	0.94	0.93	1.99	1.56	-3.96	5.92e-02	1.09e-04	Soluble	-4.12	4.15e-02	7.67e-05	Moderately soluble	-4.18	3.55e-02	6.56e-05	Moderately soluble	Low	No	Yes	No	No	No	No	Yes	-8.57
375	C[C@@]12[C@]([C@H](CC3=CC=CC=C3)NC4=O)([H])C4([C@@H](OC(C)=O)[C@@H](O5)[C@H]5[C@@](C)(O)C6=O)C(/C=C/C[C@@H]6C)[C@H](O)[C@]1(C)O2	19,20-epoxycytochalasin N1	Cytotoxic						Rosellinia	Other		CC(=O)O[C@H]1[C@H]2O[C@@H]2[C@@](C)(O)C(=O)[C@H](C/C=C/C2C31C(=O)N[C@H]([C@@H]3[C@@]1([C@]([C@H]2O)(O1)C)C)Cc1ccccc1)C	C30H37NO8	539.62	39	6	0.63	4	8	3	143.67	137.99	3.02	1.22	1.10	0.93	2.70	1.80	-3.80	8.47e-02	1.57e-04	Soluble	-3.71	1.04e-01	1.93e-04	Soluble	-4.71	1.04e-02	1.94e-05	Moderately soluble	High	No	Yes	No	No	No	Yes	No	-8.73
376	O=C1N[C@@H](CC2=CC=CC=C2)[C@]([C@]31OC4=O)([H])[C@H](C)[C@]5(C)[C@@H](O5)[C@@H]3/C=C/C[C@H](C)C([C@](C)(O)/C=C/O4)=O	Cytochalasin E	Cytotoxic	antibacterial					Dematophora	Other		O=C1O/C=C/[C@@](C)(O)C(=O)[C@H](C/C=C/[C@@H]2[C@]3(O1)C(=O)N[C@H]([C@@H]3[C@H](C)[C@@]1([C@H]2O1)C)Cc1ccccc1)C	C28H33NO7	495.56	36	6	0.54	2	7	2	135.19	114.46	2.90	3.52	2.71	1.65	2.62	2.68	-5.12	3.75e-03	7.56e-06	Moderately soluble	-5.61	1.22e-03	2.47e-06	Moderately soluble	-4.90	6.18e-03	1.25e-05	Moderately soluble	High	No	Yes	No	No	No	No	No	-6.82
377	O=C1N[C@@H](CC2=CC=CC=C2)[C@]([C@]31OC4=O)([H])C(C)C([C@@H](O)[C@@H]3/C=C/C[C@H](C)C([C@](C)(O)/C=C/O4)=O)=C	Δ6,12-cytochalasin E	Cytotoxic						Dematophora	Other		O=C1O/C=C/[C@@](C)(O)C(=O)[C@H](C/C=C/[C@@H]2[C@]3(O1)C(=O)N[C@H]([C@@H]3C(C)C(=C)[C@H]2O)Cc1ccccc1)C	C28H33NO7	495.56	36	6	0.46	2	7	3	136.87	122.16	2.98	2.33	2.47	1.58	2.17	2.30	-4.37	2.11e-02	4.25e-05	Moderately soluble	-4.53	1.45e-02	2.92e-05	Moderately soluble	-4.61	1.23e-02	2.48e-05	Moderately soluble	High	No	Yes	No	No	No	No	Yes	-7.67
378	O=C1N[C@@H](CC2=CC=C(O)C=C2)[C@]([C@]31OC4=O)([H])C(C)=C(C)[C@@H](O)[C@@H]3/C=C/C[C@H](C)C(/C(C)=C/C4)=O	Cytochalasins Z27							Xylaria	Xylaria		O=C1C/C=C(\C)/C(=O)[C@@H](C)C/C=C/[C@@H]2[C@]3(O1)C(=O)N[C@H]([C@@H]3C(=C([C@H]2O)C)C)Cc1ccc(cc1)O	C28H33NO6	479.56	35	6	0.46	2	6	3	136.22	112.93	2.69	2.49	2.78	2.23	3.11	2.66	-4.38	2.01e-02	4.20e-05	Moderately soluble	-4.51	1.49e-02	3.11e-05	Moderately soluble	-5.32	2.32e-03	4.84e-06	Moderately soluble	High	No	Yes	No	No	No	No	Yes	-7.46
379	O=C1N[C@H]([C@]([H])([C@@H](/C([C@H]([C@@H]2/C=C/C[C@@H](C(/C(C)=C/C3)=O)C)O)=C([H])/[H])C)[C@@]12OC3=O)CC4=CC=C(C=C4)O	Cytochalasins Z28							Xylaria	Xylaria		O=C1C/C=C(\C)/C(=O)[C@@H](C)C/C=C/[C@@H]2[C@]3(O1)C(=O)N[C@H]([C@@H]3[C@H](C)C(=C)[C@H]2O)Cc1ccc(cc1)O	C28H33NO6	479.56	35	6	0.46	2	6	3	136.22	112.93	45446	2.41	2.64	2.23	3.00	2.67	-4.33	2.26e-02	4.72e-05	Moderately soluble	-4.42	1.81e-02	3.77e-05	Moderately soluble	-5.11	3.69e-03	7.69e-06	Moderately soluble	High	No	Yes	No	No	No	No	Yes	-7.51
380	O=C1N[C@@H](CC2=CC=CC=C2)[C@]3([H])[C@H](C)[C@]4(C)[C@@H](O4)[C@H](/C=C/C[C@@H](C([C@@](O)(C)CC(OC)OC)=O)C)[C@@]31OC(OC)=O	Cytochalasin Z18							Xylaria	Xylaria		COC(=O)O[C@]12C(=O)N[C@H]([C@@H]2[C@@H]([C@@]2([C@H]([C@@H]1/C=C/C[C@@H](C(=O)[C@@](CC(OC)OC)(O)C)C)O2)C)C)Cc1ccccc1	C31H43NO9	573.67	41	6	0.65	14	9	2	154.37	132.92	4.38	3.34	2.82	1.17	4.36	3.21	-4.69	1.18e-02	2.06e-05	Moderately soluble	-5.81	8.92e-04	1.55e-06	Moderately soluble	-5.29	2.94e-03	5.12e-06	Moderately soluble	High	No	Yes	No	No	No	No	Yes	-7.43
381	O=C1N[C@@H](CC2=CC=CC=C2)[C@]3([H])[C@H](C)[C@]4(C)[C@@H](O4)[C@H](/C=C/C[C@@H](C([C@@](O)(C)CC=O)=O)C)[C@@]31OC(OC)=O	seco-cytochalasin E							Xylaria	Xylaria		O=CC[C@](C(=O)[C@H](C/C=C/[C@H]1[C@@H]2O[C@]2(C)[C@H]([C@@H]2[C@@]1(OC(=O)OC)C(=O)N[C@H]2Cc1ccccc1)C)C)(O)C	C29H37NO8	527.61	38	6	0.59	12	8	2	142.78	131.53	3.58	2.54	2.40	1.07	4.29	2.78	-4.04	4.85e-02	9.20e-05	Moderately soluble	-4.95	5.93e-03	1.12e-05	Moderately soluble	-4.99	5.36e-03	1.02e-05	Moderately soluble	High	No	No	No	No	No	No	Yes	-7.71
382	O=C1N[C@@H](CC2=CC=CC=C2)[C@]3([H])[C@H](C)C([C@@H](O)[C@H]4[C@@]31[C@H](O)[C@@]([C@@H](O)[C@@](C(C)=O)(O)[C@@H](C)C5)([H])[C@]5([H])[C@@H]4O)=C	Curtachalasins A			Weak antifungal activity against Microsporum gypseum, with inhibition percentage of 70.3%				Xylaria	Xylaria	Pyrolidine/perhydroanthracene tetracyclic ring system	C=C1[C@@H](C)[C@H]2[C@H](Cc3ccccc3)NC(=O)[C@]32[C@H]([C@@H]1O)[C@@H](O)[C@H]1[C@H]([C@H]3O)[C@@H](O)[C@]([C@H](C1)C)(O)C(=O)C	C28H37NO7	499.60	36	6	0.64	3	7	6	136.13	147.32	2.32	0.46	-0.18	0.59	1.04	0.85	-3.15	3.52e-01	7.04e-04	Soluble	-3.12	3.77e-01	7.55e-04	Soluble	-3.06	4.31e-01	8.63e-04	Soluble	Low	No	Yes	No	No	No	No	No	-9.02
383	O=C1N[C@@H](CC2=CC=CC=C2)[C@]3([H])[C@H](C)[C@@H](C)C(C4=C[C@@]5([H])[C@]([C@@H](O)[C@@](C(C)=O)(O)[C@@H](C)C5)([H])[C@@H](O)[C@@]341)=O	Curtachalasins B			Weak antifungal activity against Microsporum gypseum, with inhibition percentage of 68.4%				Xylaria	Xylaria	Pyrolidine/perhydroanthracene tetracyclic ring system	C[C@@H]1[C@@H](C)C(=O)C2=C[C@H]3[C@H]([C@H]([C@]42[C@@H]1[C@H](Cc1ccccc1)NC4=O)O)[C@@H](O)[C@]([C@H](C3)C)(O)C(=O)C	C28H35NO6	481.58	35	6	0.61	3	6	4	134.01	123.93	2.56	2.03	1.06	1.30	2.24	1.84	-4.03	4.46e-02	9.26e-05	Moderately soluble	-4.26	2.64e-02	5.49e-05	Moderately soluble	-4.34	2.22e-02	4.61e-05	Moderately soluble	High	No	Yes	No	No	No	No	No	-7.80
384	O=C1N[C@@H](CC2=CC=CC=C2)[C@]3([H])[C@H](C)C(C)=C[C@@]4([H])C31C([C@@]([C@@]5(C)C[C@@H](CO)C[C@@H]6O5)([H])[C@@]6([H])C4)=O	Xylastriasan A	Weak cytotoxicity against HEPG2, A549, and B16 of 93.61, 91.58 and 85.61 μM, respectively						Xylaria	Xylaria	Unusual pentacyclic ring system	OC[C@H]1C[C@@H]2O[C@@](C1)(C)[C@@H]1[C@H]2C[C@@H]2C3(C1=O)C(=O)N[C@H]([C@@H]3[C@@H](C(=C2)C)C)Cc1ccccc1	C28H35NO4	449.58	33	6	0.64	3	4	2	130.45	75.63	3.60	2.95	2.93	2.99	3.78	3.25	-4.42	1.70e-02	3.78e-05	Moderately soluble	-4.20	2.83e-02	6.30e-05	Moderately soluble	-5.83	6.63e-04	1.48e-06	Moderately soluble	High	Yes	Yes	No	No	No	No	No	-6.95
385	O=C1N[C@@H](CC2=CC=CC=C2)[C@]3([H])[C@H](C)C([C@@H](O)[C@H]4C31[C@H](OC(C)=O)[C@H]([C@@H](O)[C@@]5(C)O)O[C@@H]4[C@H](O)C[C@H](C)C5=O)=C	Cytochalasins D1	Mild cytotoxicity against HL-60 of 12.7						Xylaria	Xylaria		CC(=O)O[C@@H]1[C@H]2O[C@@H]([C@@H]3C41C(=O)N[C@H]([C@@H]4[C@H](C)C(=C)[C@H]3O)Cc1ccccc1)[C@H](O)C[C@@H](C(=O)[C@]([C@@H]2O)(C)O)C	C30H39NO9	557.63	40	6	0.63	4	9	5	146.95	162.62	3.02	0.12	-0.09	0.16	1.14	0.87	-3.22	3.36e-01	6.03e-04	Soluble	-3.09	4.52e-01	8.11e-04	Soluble	-3.61	1.38e-01	2.48e-04	Soluble	Low	No	Yes	No	No	No	No	No	-9.62
386	O=C1N[C@@H](CC2=CC=CC=C2)[C@]3([H])C(C)=C(C)[C@@H](O)[C@H]4C31[C@H](OC(C)=O)[C@H]([C@@H](O)[C@@]5(C)O)O[C@@H]4[C@H](O)C[C@H](C)C5=O	Cytochalasins C1	Mild cytotoxicity against HL-60 of 22.3						Xylaria	Xylaria		CC(=O)O[C@@H]1[C@H]2O[C@@H]([C@@H]3C41C(=O)N[C@H]([C@@H]4C(=C([C@H]3O)C)C)Cc1ccccc1)[C@H](O)C[C@@H](C(=O)[C@]([C@@H]2O)(C)O)C	C30H39NO9	557.63	40	6	0.63	4	9	5	146.95	162.62	3.20	-0.45	0.06	0.16	1.25	0.84	-2.86	7.68e-01	1.38e-03	Soluble	-2.50	1.77e+00	3.17e-03	Soluble	-3.81	8.68e-02	1.56e-04	Soluble	Low	No	Yes	No	No	No	No	No	-10.02
387	[H][C@]1(C2C(NC3=O)=C(Cl)C4=C(C=CC=C4)C1)[C@@H](C)C[C@]([C@@]23[C@@H]5OC(C)=O)([H])[C@@H](Cl)[C@@]6([H])[C@@]5([H])[C@@H](O)[C@@](C(C)=O)(O)[C@@H](C)C6	Xylarichalasin A	Moderate to potent cytotoxicity against HL-60, A549, SMMC-7721, MCF-7, SW480 of 17.3, 11.8, 8.6, 6.3 and 13.2, respectively						Xylaria	Xylaria	Halogenated hexacyclic cytochalasan	CC(=O)O[C@@H]1[C@H]2[C@@H](C[C@@H]([C@@]([C@@H]2O)(O)C(=O)C)C)[C@@H]([C@@H]2[C@]31C(=O)NC1=C(Cl)c4c(C[C@@H](C31)[C@H](C2)C)cccc4)Cl	C30H35Cl2NO6	576.51	39	6	0.63	3	6	3	151.97	112.93	2.88	3.73	3.28	2.88	3.62	3.28	-5.68	1.20e-03	2.09e-06	Moderately soluble	-5.79	9.28e-04	1.61e-06	Moderately soluble	-5.96	6.25e-04	1.08e-06	Moderately soluble	High	No	Yes	No	No	No	No	No	-7.17
388	O=C1N[C@@H](CC2=CC=CC=C2)[C@]3([H])[C@H](C)[C@@](C)(O)[C@@H](O)[C@H](/C=C/C[C@@H]4C)[C@@]31[C@H](OC(C)=O)/C=C/[C@@](C)(O)C4=O	Cytochalasins P	Selective cytotoxicity against HL-60, A549 SMMC-7721, MCF-7, SW480 from 4.17–37.18; moderate cytotoxic effect against HCT-15 between 50 and 100 μM;						Xylaria	Xylaria		CC(=O)O[C@@H]1/C=C/[C@@](C)(O)C(=O)[C@H](C/C=C/[C@@H]2[C@]31C(=O)N[C@H]([C@@H]3[C@H](C)[C@@]([C@H]2O)(C)O)Cc1ccccc1)C	C30H39NO7	525.63	38	6	0.57	4	7	4	146.38	133.16	1.77	2.28	1.73	1.63	2.15	1.91	-4.39	2.15e-02	4.09e-05	Moderately soluble	-4.71	1.02e-02	1.93e-05	Moderately soluble	-4.46	1.81e-02	3.45e-05	Moderately soluble	High	No	Yes	No	No	No	No	Yes	-7.89
389	O=C1N[C@@H](CC2=CC=CC=C2)[C@]3([H])[C@H](C)C([C@@H](OC(C)=O)[C@H](/C=C/C[C@@H]4C)[C@@]31[C@H](OC(C)=O)/C=C/[C@@](C)(O)C4=O)=C	7-O-Acetylcytochalasin D							Xylaria	Xylaria		CC(=O)O[C@@H]1/C=C/[C@@](C)(O)C(=O)[C@H](C/C=C/[C@@H]2[C@]31C(=O)N[C@H]([C@@H]3[C@H](C)C(=C)[C@H]2OC(=O)C)Cc1ccccc1)C	C32H39NO7	549.65	40	6	0.50	6	7	2	154.45	119.00	3.80	3.32	3.11	2.67	3.43	3.27	-5.05	4.85e-03	8.82e-06	Moderately soluble	-5.50	1.76e-03	3.20e-06	Moderately soluble	-5.67	1.18e-03	2.14e-06	Moderately soluble	High	No	Yes	No	No	No	No	Yes	-7.30
390	O=C1N[C@@H](CC2=CC=CC=C2)[C@]3([H])[C@H](C)[C@@H](C)C([C@H](/C=C/C[C@@H]4C)[C@@]31[C@H](OC(C)=O)/C=C/[C@@](C)(O)C4=O)=O	6,7-Dihydro-7-oxo-cytochalasin C	Selective cytotoxicity against HL-60, A549 SMMC-7721, MCF-7, SW480 from 4.17–37.18; moderate cytotoxic effect against HCT-15 between 50 and 100 μM;						Xylaria	Xylaria		CC(=O)O[C@@H]1/C=C/[C@@](C)(O)C(=O)[C@H](C/C=C/[C@@H]2[C@]31C(=O)N[C@H]([C@@H]3[C@H](C)[C@H](C2=O)C)Cc1ccccc1)C	C30H37NO6	507.62	37	6	0.53	4	6	2	144.22	109.77	2.70	3.53	2.82	2.35	3.23	2.93	-5.07	4.35e-03	8.57e-06	Moderately soluble	-5.52	1.53e-03	3.02e-06	Moderately soluble	-5.53	1.49e-03	2.93e-06	Moderately soluble	High	No	Yes	No	No	No	No	Yes	-6.89
391	O=C1N[C@@H](CC2=CC=CC=C2)[C@]3([H])[C@H](C)[C@@]4(CO4)[C@@H](O)[C@H](/C=C/C[C@@H]5C)[C@@]31[C@H](OC(C)=O)/C=C/[C@@](C)(O)C5=O	6,12-Epoxycytochalasin D							Xylaria	Xylaria		CC(=O)O[C@@H]1/C=C/[C@@](C)(O)C(=O)[C@H](C/C=C/[C@@H]2[C@]31C(=O)N[C@H]([C@@H]3[C@H](C)[C@@]1([C@H]2O)OC1)Cc1ccccc1)C	C30H37NO7	523.62	38	6	0.57	4	7	3	144.19	125.46	3.33	2.23	1.75	1.63	2.58	2.31	-4.34	2.37e-02	4.53e-05	Moderately soluble	-4.50	1.66e-02	3.16e-05	Moderately soluble	-4.66	1.14e-02	2.17e-05	Moderately soluble	High	No	Yes	No	No	No	No	Yes	-7.91
392	O=C1N[C@@H](CC2=CC=CC=C2)[C@]3([H])[C@H](C)[C@](C)(O)[C@@H](O)[C@H](/C=C/C[C@@H]4C)[C@@]31[C@H](OC(C)=O)/C=C/[C@@](C)(O)C4=O	6-Epi-cytochalasin P							Xylaria	Xylaria		CC(=O)O[C@@H]1/C=C/[C@@](C)(O)C(=O)[C@H](C/C=C/[C@@H]2[C@]31C(=O)N[C@H]([C@@H]3[C@H](C)[C@]([C@H]2O)(C)O)Cc1ccccc1)C	C30H39NO7	525.63	38	6	0.57	4	7	4	146.38	133.16	2.98	2.28	1.73	1.63	2.15	2.15	-4.39	2.15e-02	4.09e-05	Moderately soluble	-4.71	1.02e-02	1.93e-05	Moderately soluble	-4.46	1.81e-02	3.45e-05	Moderately soluble	High	No	Yes	No	No	No	No	Yes	-7.89
393	O=C1N[C@@H](CC2=CC=CC=C2)[C@]3([H])[C@H](C)[C@@](C)(O)[C@@H](OC(C)=O)[C@H](/C=C/C[C@@H]4C)[C@@]31[C@H](OC(C)=O)/C=C/[C@@](C)(O)C4=O	7-O-Acetylcytochalasin P							Xylaria	Xylaria		CC(=O)O[C@@H]1/C=C/[C@@](C)(O)C(=O)[C@H](C/C=C/[C@@H]2[C@]31C(=O)N[C@H]([C@@H]3[C@H](C)[C@@]([C@H]2OC(=O)C)(C)O)Cc1ccccc1)C	C32H41NO8	567.67	41	6	0.56	6	8	3	156.12	139.23	2.34	2.86	2.30	1.97	2.67	2.43	-4.87	7.59e-03	1.34e-05	Moderately soluble	-5.44	2.05e-03	3.61e-06	Moderately soluble	-5.06	4.92e-03	8.67e-06	Moderately soluble	Low	No	Yes	No	No	No	No	Yes	-7.73
394	O=C1N[C@@H](CC2=CC=CC=C2)[C@]3([H])C(C)=C(C)C([C@H](/C=C/C[C@@H]4C)[C@@]31[C@H](OC(C)=O)/C=C/[C@H](C)C4=O)=O	7-Oxo-cytochalasin C							Xylaria	Xylaria		CC(=O)O[C@@H]1/C=C/[C@H](C)C(=O)[C@H](C/C=C/[C@@H]2[C@]31C(=O)N[C@H]([C@@H]3C(=C(C2=O)C)C)Cc1ccccc1)C	C30H35NO5	489.60	36	6	0.47	4	5	1	142.55	89.54	2.88	3.78	3.77	3.07	4.10	3.52	-5.12	3.75e-03	7.65e-06	Moderately soluble	-5.35	2.17e-03	4.43e-06	Moderately soluble	-6.34	2.24e-04	4.57e-07	Poorly soluble	High	No	Yes	No	No	No	No	Yes	-6.60
395	O=C1N[C@@H](CC2=CC=CC=C2)[C@]3([H])[C@H](C)[C@]4(CO)[C@@H](O4)[C@H](/C=C/C[C@@H]5C)[C@@]31[C@H](OC(C)=O)/C=C/[C@@](C)(O)C5=O	12-Hydroxylcytochalasin Q	Potent cytotoxicity against HCT-15 of 13.4						Xylaria	Xylaria		OC[C@@]12O[C@H]2[C@H]2[C@]3([C@@H]([C@@H]1C)[C@H](Cc1ccccc1)NC3=O)[C@@H](/C=C/[C@@](C(=O)[C@H](C/C=C/2)C)(C)O)OC(=O)C	C30H37NO7	523.62	38	6	0.57	5	7	3	144.19	125.46	3.01	2.23	1.75	1.63	2.75	2.28	-4.28	2.76e-02	5.27e-05	Moderately soluble	-4.50	1.66e-02	3.16e-05	Moderately soluble	-4.79	8.49e-03	1.62e-05	Moderately soluble	High	No	Yes	No	No	No	No	Yes	-7.91
396	O/C(C)=C1C2=CC3=C([C@H](OC)[C@](C4=O)(C)[C@H](C)[C@H]3[C@@H](N4)CC5=CC=CC=C5)C=C2C[C@H](C)C/1=O	Curtachalasins C			Potent antifungal effect against fluconazole-resistant Candida albicans				Xylaria	Xylaria	Unusual bridged 6/6/6/6 ring fused system	CO[C@H]1c2cc3C[C@H](C)C(=O)/C(=C(\O)/C)/c3cc2[C@H]2[C@H]([C@]1(C)C(=O)N[C@H]2Cc1ccccc1)C	C29H33NO4	459.58	34	12	0.45	3	4	2	136.77	75.63	3.47	4.77	4.20	2.95	5.13	4.10	-5.76	8.03e-04	1.75e-06	Moderately soluble	-6.09	3.74e-04	8.14e-07	Poorly soluble	-7.75	8.17e-06	1.78e-08	Poorly soluble	High	No	Yes	No	No	No	No	Yes	-5.72
397	O/C(C)=C1C2=CC3=C([C@H](OC)[C@](C4=O)(C)[C@H](C)[C@H]3[C@@H](N4)CC5=CC=CC=C5)C=C2C[C@@H](C)C/1=O	Curtachalasins D							Xylaria	Xylaria		CO[C@H]1c2cc3C[C@@H](C)C(=O)/C(=C(\O)/C)/c3cc2[C@H]2[C@H]([C@]1(C)C(=O)N[C@H]2Cc1ccccc1)C	C29H33NO4	459.58	34	12	0.45	3	4	2	136.77	75.63	3.20	4.77	4.20	2.95	5.13	4.05	-5.76	8.03e-04	1.75e-06	Moderately soluble	-6.09	3.74e-04	8.14e-07	Poorly soluble	-7.75	8.17e-06	1.78e-08	Poorly soluble	High	No	Yes	No	No	No	No	Yes	-5.72
398	C[C@@H]1[C@](C(C)=O)(O)[C@H](O)C2=CC3=C([C@H](O)[C@](C4=O)(C)[C@H](C)[C@H]3[C@@H](N4)CC5=CC=CC=C5)C=C2C1	Curtachalasins E			Weak antifungal effect against fluconazole-resistant Candida albicans				Xylaria	Xylaria		O=C1N[C@@H](Cc2ccccc2)[C@@H]2[C@H]([C@@]1(C)[C@@H](O)c1c2cc2c(c1)C[C@@H]([C@@]([C@@H]2O)(O)C(=O)C)C)C	C28H33NO5	463.57	34	12	0.50	3	5	4	132.52	106.86	2.88	2.58	1.72	2.02	3.70	2.58	-4.40	1.83e-02	3.96e-05	Moderately soluble	-4.47	1.56e-02	3.37e-05	Moderately soluble	-6.26	2.57e-04	5.53e-07	Poorly soluble	High	No	Yes	No	No	No	No	No	-7.30
399	O=C1N[C@@H](CC2=CC=CC=C2)C3[C@H](C)[C@](O)(C)[C@@H](O)[C@H](/C=C/C[C@@H]4C)[C@@]31[C@H](OC(C)=O)[C@@H]5[C@@H](O5)[C@@](C)(O)C4=O	19-epi-cytochalasin P1	Cytotoxic						Xylaria	Xylaria		CC(=O)O[C@@H]1[C@H]2O[C@H]2[C@@](C)(O)C(=O)[C@H](C/C=C/[C@@H]2[C@]31C(=O)N[C@H](C3[C@H](C)[C@@]([C@H]2O)(C)O)Cc1ccccc1)C	C30H39NO8	541.63	39	6	0.63	4	8	4	145.83	145.69	2.97	1.45	0.94	0.93	1.99	1.66	-3.96	5.92e-02	1.09e-04	Soluble	-4.12	4.15e-02	7.67e-05	Moderately soluble	-4.18	3.55e-02	6.56e-05	Moderately soluble	Low	No	Yes	No	No	No	No	Yes	-8.57
400	O=C1N[C@@H](CC2=CC=CC=C2)C3[C@H](C)[C@](C)(O)[C@@H](O)[C@H](/C=C/C[C@@H]4C)[C@@]31[C@H](OC(C)=O)[C@@H]5[C@@H](O5)[C@@](C)(O)C4=O	6-epi-19,20-epoxycytochalasin P	Cytotoxic						Xylaria	Xylaria		CC(=O)O[C@@H]1[C@H]2O[C@H]2[C@@](C)(O)C(=O)[C@H](C/C=C/[C@@H]2[C@]31C(=O)N[C@H](C3[C@H](C)[C@]([C@H]2O)(C)O)Cc1ccccc1)C	C30H39NO8	541.63	39	6	0.63	4	8	4	145.83	145.69	2.52	1.45	0.94	0.93	1.99	1.57	-3.96	5.92e-02	1.09e-04	Soluble	-4.12	4.15e-02	7.67e-05	Moderately soluble	-4.18	3.55e-02	6.56e-05	Moderately soluble	Low	No	Yes	No	No	No	No	Yes	-8.57
401	O=C1N[C@@H](CC2=CC=CC=C2)C3[C@H](C)[C@](C)(O)[C@@H](OC(C)=O)[C@H](/C=C/C[C@@H]4C)[C@@]31[C@H](OC(C)=O)[C@@H]5[C@@H](O5)[C@@](C)(O)C4=O	7-O-acetyl-6-epi-19,20-epoxycytochalasin P	Cytotoxic						Xylaria	Xylaria		CC(=O)O[C@@H]1[C@H]2O[C@H]2[C@@](C)(O)C(=O)[C@H](C/C=C/[C@@H]2[C@]31C(=O)N[C@H](C3[C@H](C)[C@]([C@H]2OC(=O)C)(C)O)Cc1ccccc1)C	C32H41NO9	583.67	42	6	0.62	6	9	3	155.56	151.76	3.33	2.02	1.51	1.28	2.51	2.13	-4.44	2.11e-02	3.62e-05	Moderately soluble	-4.83	8.55e-03	1.46e-05	Moderately soluble	-4.78	9.66e-03	1.66e-05	Moderately soluble	Low	No	Yes	No	No	No	No	Yes	-8.43
402	O=C1N[C@@H](CC2=CC=CC=C2)C3[C@H](C)[C@](O)(C)[C@@H](OC(C)=O)[C@H](/C=C/C[C@@H]4C)[C@@]31[C@H](OC(C)=O)[C@@H]5[C@@H](O5)[C@@](C)(O)C4=O	7-O-acetyl 19-epi-cytochalasin P1	No cytotoxicity						Xylaria	Xylaria		CC(=O)O[C@@H]1[C@H]2O[C@H]2[C@@](C)(O)C(=O)[C@H](C/C=C/[C@@H]2[C@]31C(=O)N[C@H](C3[C@H](C)[C@@]([C@H]2OC(=O)C)(C)O)Cc1ccccc1)C	C32H41NO9	583.67	42	6	0.62	6	9	3	155.56	151.76	3.12	2.02	1.51	1.28	2.51	2.09	-4.44	2.11e-02	3.62e-05	Moderately soluble	-4.83	8.55e-03	1.46e-05	Moderately soluble	-4.78	9.66e-03	1.66e-05	Moderately soluble	Low	No	Yes	No	No	No	No	Yes	-8.43
403	O=C1N[C@@H](CC2=CC=CC=C2)C3[C@H](C)[C@](C)(OC(C)=O)[C@@H](O)[C@H](/C=C/C[C@@H]4C)[C@@]31[C@H](OC(C)=O)[C@@H]5[C@@H](O5)[C@@](C)(O)C4=O	6-O-acetyl-6-epi-19,20-epox ycytochalasin P	No cytotoxicity						Xylaria	Xylaria		CC(=O)O[C@@H]1[C@H]2O[C@H]2[C@@](C)(O)C(=O)[C@H](C/C=C/[C@@H]2[C@]31C(=O)N[C@H](C3[C@H](C)[C@]([C@H]2O)(C)OC(=O)C)Cc1ccccc1)C	C32H41NO9	583.67	42	6	0.62	6	9	3	155.56	151.76	3.36	2.02	1.51	1.28	2.51	2.14	-4.44	2.11e-02	3.62e-05	Moderately soluble	-4.83	8.55e-03	1.46e-05	Moderately soluble	-4.78	9.66e-03	1.66e-05	Moderately soluble	Low	No	Yes	No	No	No	No	Yes	-8.43
404	O=C1N[C@@H](CC2=CC=CC=C2)C3C(C)=C(C)[C@@H](OC(C)=O)[C@H](/C=C/C[C@@H]4C)[C@@]31[C@H](OC(C)=O)[C@@H]5[C@@H](O5)[C@@](C)(O)C4=O	7-O-acetyl-19,20-epoxycytochalasin C	No cytotoxicity						Xylaria	Xylaria		CC(=O)O[C@@H]1[C@H]2O[C@H]2[C@@](C)(O)C(=O)[C@H](C/C=C/[C@@H]2[C@]31C(=O)N[C@H](C3C(=C([C@H]2OC(=O)C)C)C)Cc1ccccc1)C	C32H39NO8	565.65	41	6	0.56	6	8	2	153.89	131.53	4.07	1.92	2.46	1.97	3.38	2.76	-4.27	3.05e-02	5.38e-05	Moderately soluble	-4.31	2.80e-02	4.95e-05	Moderately soluble	-5.59	1.45e-03	2.56e-06	Moderately soluble	High	No	Yes	No	No	No	No	Yes	-8.39
405	O=C1N[C@@H](CC2=CC=CC=C2)C([C@]13[C@@H](/C=C/C[C@H](C)C([C@](C)(O)[C@H](O4)[C@H]4[C@H]3OC(C)=O)=O)[C@@H]5OC(C)=O)[C@H](C)C5=C	7-O-acetyl 19,20-epoxycytochalasin C (exomethylene analogue)	Cytotoxic						Xylaria	Xylaria		CC(=O)O[C@@H]1[C@H]2O[C@H]2[C@@](C)(O)C(=O)[C@H](C/C=C/[C@@H]2[C@]31C(=O)N[C@H](C3[C@H](C)C(=C)[C@H]2OC(=O)C)Cc1ccccc1)C	C32H39NO8	565.65	41	6	0.56	6	8	2	153.89	131.53	2.99	2.49	2.32	1.97	3.27	2.61	-4.63	1.33e-02	2.35e-05	Moderately soluble	-4.90	7.17e-03	1.27e-05	Moderately soluble	-5.39	2.30e-03	4.07e-06	Moderately soluble	High	No	Yes	No	No	No	No	Yes	-7.98
406	O[C@H]1[C@]2([C@H]3/C=C/C[C@H](C)C([C@](C)(O)[C@H]4[C@@H]1O4)=O)C([C@H](CC5=CC=CC=C5)NC2=O)[C@H](C)[C@@H](C)C3=O	deacetyl-5,6-dihydro-7-oxo-19,20-epoxycytochalasin C	No cytotoxicity						Xylaria	Xylaria		C[C@@H]1[C@@H](C)C2[C@H](Cc3ccccc3)NC(=O)[C@]32[C@H](C1=O)/C=C/C[C@H](C)C(=O)[C@]([C@H]1[C@@H]([C@H]3O)O1)(C)O	C28H35NO6	481.58	35	6	0.61	2	6	3	133.93	116.23	2.78	2.13	1.46	1.30	2.56	2.05	-4.16	3.31e-02	6.88e-05	Moderately soluble	-4.20	3.02e-02	6.28e-05	Moderately soluble	-4.65	1.08e-02	2.23e-05	Moderately soluble	High	No	Yes	No	No	No	No	No	-7.73
407	O=C1N[C@@H](CC2=CC=CC=C2)C3[C@]4(C)[C@](O4)(C)[C@@H](O)[C@H](/C=C/C[C@H](C)[C@@H](O)[C@@H](C)[C@H]5[C@@H]6O5)[C@@]31C6=O	18-deoxy-21-oxo-deacetyl-19,20-epoxycytochalasin N	No cytotoxicity						Xylaria	Xylaria		O[C@@H]1[C@@H](C)C/C=C/[C@@H]2[C@]3(C(=O)[C@@H]4[C@H]([C@@H]1C)O4)C(=O)N[C@H](C3[C@@]1([C@@]([C@H]2O)(C)O1)C)Cc1ccccc1	C28H35NO6	481.58	35	6	0.64	2	6	3	132.74	111.69	3.14	2.35	1.42	1.38	2.69	2.20	-4.30	2.41e-02	5.00e-05	Moderately soluble	-4.34	2.23e-02	4.62e-05	Moderately soluble	-4.48	1.58e-02	3.28e-05	Moderately soluble	High	No	Yes	No	No	No	Yes	No	-7.57
408	O=C1N[C@@H](CC2=CC=CC=C2)C3C(C)=C(C)[C@@H](O)[C@H](/C=C/C[C@@H]4C)[C@@]31[C@H](OC(C)=O)[C@@H]5[C@@H](O5)[C@@](C)([H])C4=O	18-desoxy-19,20 epoxycytochalasin C	No cytotoxicity						Xylaria	Xylaria		CC(=O)O[C@@H]1[C@H]2O[C@H]2[C@H](C)C(=O)[C@H](C/C=C/[C@@H]2[C@]31C(=O)N[C@H](C3C(=C([C@H]2O)C)C)Cc1ccccc1)C	C30H37NO6	507.62	37	6	0.57	4	6	2	142.95	105.23	3.00	2.28	2.78	2.42	3.36	2.77	-4.28	2.67e-02	5.25e-05	Moderately soluble	-4.13	3.79e-02	7.46e-05	Moderately soluble	-5.37	2.19e-03	4.31e-06	Moderately soluble	High	No	Yes	No	No	No	No	Yes	-7.78
409	O=C1N[C@@H](CC2=CC=CC=C2)C([C@]13[C@H]4/C=C/C[C@H](C)C([C@](C)(O)[C@H](O5)[C@H]5[C@H]3OC(C)=O)=O)[C@H](C)[C@@H](C)C4=O	5,6-dihydro-7-oxo-19,20-epoxycytochalasin C	Cytotoxic						Xylaria	Xylaria		CC(=O)O[C@@H]1[C@H]2O[C@H]2[C@@](C)(O)C(=O)[C@H](C/C=C/[C@@H]2[C@]31C(=O)N[C@H](C3[C@H](C)[C@H](C2=O)C)Cc1ccccc1)C	C30H37NO7	523.62	38	6	0.60	4	7	2	143.67	122.30	3.19	2.70	2.04	1.63	3.07	2.53	-4.64	1.20e-02	2.29e-05	Moderately soluble	-4.92	6.28e-03	1.20e-05	Moderately soluble	-5.25	2.91e-03	5.56e-06	Moderately soluble	High	No	Yes	No	No	No	No	Yes	-7.58
410	C[C@]12[C@@H](O2)[C@@](/C=C/C[C@@H]3C)([H])[C@@]4([C@H](OC(C)=O)/C=C/[C@@](C)(O)C3=O)[C@@]([C@H](CC5=CC=CC=C5)NC4=O)([H])[C@@H]1C	Cytochalasin Q	Moderate cytotoxic effect against HCT-15 between 50 and 100 μM						Xylaria	Xylaria		CC(=O)O[C@@H]1/C=C/[C@@](C)(O)C(=O)[C@H](C/C=C/[C@@H]2[C@]31C(=O)N[C@H]([C@@H]3[C@H](C)[C@@]1([C@H]2O1)C)Cc1ccccc1)C	C30H37NO6	507.62	37	6	0.57	4	6	2	143.03	105.23	3.26	3.28	2.78	2.42	3.36	3.02	-4.91	6.25e-03	1.23e-05	Moderately soluble	-5.16	3.47e-03	6.84e-06	Moderately soluble	-5.37	2.19e-03	4.31e-06	Moderately soluble	High	No	Yes	No	No	No	No	Yes	-7.07
411	C=C1[C@@H](O)[C@@]2([H])[C@@]3([C@H](OC(C)=O)[C@@]([C@@]([H])(C(C)=O)C([C@@H](C)C4)=O)([H])[C@]4([H])[C@@H]2O)[C@@]([C@H](CC5=CC=CC=C5)NC3=O)([H])[C@@H]1C	Arbuschalasins A	Weak cytotoxic effect against HCT-15 at concentration of 100 μM						Xylaria	Xylaria		CC(=O)O[C@@H]1[C@@H]2[C@@H](C(=O)C)C(=O)[C@H](C[C@H]2[C@@H]([C@@H]2[C@]31C(=O)N[C@H]([C@@H]3[C@H](C)C(=C)[C@H]2O)Cc1ccccc1)O)C	C30H37NO7	523.62	38	6	0.60	5	7	3	143.70	130.00	1.93	1.59	1.48	1.63	2.64	1.86	-3.87	6.98e-02	1.33e-04	Soluble	-3.93	6.14e-02	1.17e-04	Soluble	-4.74	9.57e-03	1.83e-05	Moderately soluble	High	No	Yes	No	No	No	No	Yes	-8.37
412	CC1=C(C)[C@]([C@H](CC2=CC=CC=C2)NC3=O)([H])[C@]3([C@H](OC(C)=O)[C@@]([C@@]([H])(C(C)=O)C([C@@H](C)C4)=O)([H])[C@]4([H])[C@@H]5O)[C@]5([H])[C@@H]1O	Arbuschalasins B	Weak cytotoxic effect against HCT-15 at concentration of 100 μM						Xylaria	Xylaria		CC(=O)O[C@@H]1[C@@H]2[C@@H](C(=O)C)C(=O)[C@H](C[C@H]2[C@@H]([C@@H]2[C@]31C(=O)N[C@H]([C@@H]3C(=C([C@H]2O)C)C)Cc1ccccc1)O)C	C30H37NO7	523.62	38	6	0.60	5	7	3	143.70	130.00	2.86	1.01	1.63	1.63	2.75	1.98	-3.51	1.62e-01	3.09e-04	Soluble	-3.33	2.45e-01	4.69e-04	Soluble	-4.94	6.01e-03	1.15e-05	Moderately soluble	High	No	Yes	No	No	No	No	Yes	-8.78
413	C[C@H]1[C@]([C@H](CC2=CC=CC=C2)NC3=O)([H])[C@]3([C@H](OC(C)=O)/C=C/[C@@](C)(O)C4=O)[C@](/C=C/C[C@@H]4C)([H])C=C1C=O	Arbuschalasins C	Weak cytotoxic effect against HCT-15 at concentration of 100 μM						Xylaria	Xylaria		O=CC1=C[C@@H]2/C=C/C[C@H](C)C(=O)[C@](/C=C/[C@H]([C@]32[C@@H]([C@@H]1C)[C@H](Cc1ccccc1)NC3=O)OC(=O)C)(C)O	C30H35NO6	505.60	37	6	0.47	5	6	2	143.75	109.77	2.95	3.13	2.74	2.27	3.22	2.86	-4.74	9.27e-03	1.83e-05	Moderately soluble	-5.10	3.98e-03	7.86e-06	Moderately soluble	-5.19	3.27e-03	6.47e-06	Moderately soluble	High	No	Yes	No	No	No	No	Yes	-7.16
414	[H][C@@]([C@H](CC1=CC=CC=C1)NC2=O)([C@H](C)[C@]3(C)C=O)[C@]2([C@H](OC(C)=O)/C=C/[C@]4(O)C)[C@@]3([H])/C=C/C[C@H](C)C4=O	Arbuschalasins D	Weak cytotoxic effect against HCT-15 at concentration of 100 μM						Xylaria	Xylaria		O=C[C@@]1(C)[C@@H](C)[C@@H]2[C@]3([C@H]1/C=C/C[C@H](C)C(=O)[C@](/C=C/[C@H]3OC(=O)C)(C)O)C(=O)N[C@H]2Cc1ccccc1	C30H37NO6	507.62	37	6	0.53	5	6	2	143.96	109.77	3.26	3.16	2.82	2.35	3.51	3.02	-4.77	8.66e-03	1.71e-05	Moderately soluble	-5.14	3.72e-03	7.32e-06	Moderately soluble	-5.53	1.49e-03	2.93e-06	Moderately soluble	High	No	Yes	No	No	No	No	Yes	-7.15
415	C=C1[C@@H](O)[C@@]([C@H](O2)[C@H]2C[C@@H]3C)([H])[C@@]4([C@H](OC(C)=O)/C=C/[C@@](C)(O)C3=O)[C@@]([C@H](CC5=CC=CC=C5)NC4=O)([H])[C@@H]1C	Cytochalasin D 13,14-epoxid	Moderate cytotoxic effect against HCT-15 between 50 and 100 μM						Xylaria	Xylaria		CC(=O)O[C@@H]1/C=C/[C@@](C)(O)C(=O)[C@H](C/C=C/[C@@H]2[C@]31C(=O)N[C@H]([C@@H]3[C@H](C)[C@@]1([C@H]2O1)C)Cc1ccccc1)C	C30H37NO6	507.62	37	6	0.57	4	6	2	143.03	105.23	3.26	3.28	2.78	2.42	3.36	3.02	-4.91	6.25e-03	1.23e-05	Moderately soluble	-5.16	3.47e-03	6.84e-06	Moderately soluble	-5.37	2.19e-03	4.31e-06	Moderately soluble	High	No	Yes	No	No	No	No	Yes	-7.07
416	C[C@H]1[C@]([C@H](CC2=CC=CC=C2)NC3=O)([H])[C@]3([C@H](OC(C)=O)CC[C@@](C)(O)C4=O)[C@](/C=C/C[C@@H]4C)([H])[C@H](O)[C@]1(C)O	Cytochalasin O	Moderate cytotoxic effect against HCT-15 between 50 and 100 μM						Xylaria	Xylaria		CC(=O)O[C@@H]1CC[C@@](C)(O)C(=O)[C@H](C/C=C/[C@@H]2[C@]31C(=O)N[C@H]([C@@H]3[C@H](C)[C@@]([C@H]2O)(C)O)Cc1ccccc1)C	C30H41NO7	527.65	38	6	0.63	4	7	4	146.86	133.16	2.45	2.41	1.96	1.71	2.55	2.22	-4.48	1.74e-02	3.29e-05	Moderately soluble	-4.85	7.48e-03	1.42e-05	Moderately soluble	-4.93	6.23e-03	1.18e-05	Moderately soluble	High	No	Yes	No	No	No	No	Yes	-7.81
417	CC(C)C[C@H](N1)[C@]2([H])[C@H](C)[C@@H]3[C@@H](O3)[C@@]4([H])[C@]2(C(/C([C@]4([H])C5)=C/CCCC5=O)=O)C1=O	Lagambasines A			No antifungal ability against Trichoderma longibrachiatum UAMH 7956 and T. reesei QM6a				Xylaria	Xylaria		CC(C[C@@H]1NC(=O)[C@]23[C@H]1[C@H](C)[C@H]1O[C@H]1[C@@H]2[C@@H]1C(=CCCCC(=O)C1)C3=O)C	C22H29NO4	371.47	27	0	0.77	2	4	1	104.97	75.77	2.91	2.15	2.05	1.92	3.17	2.44	-3.37	1.60e-01	4.31e-04	Soluble	-3.37	1.57e-01	4.23e-04	Soluble	-3.73	6.87e-02	1.85e-04	Soluble	High	Yes	Yes	No	No	No	No	No	-7.04
418	CC(C)C[C@H](N1)[C@]2([H])[C@H](C)[C@@H]3[C@@H](O3)[C@]([H])(/C=C/4)[C@]2(C(/C=C/CCCC4=O)=O)C1=O	Lagambasines B			No antifungal ability against Trichoderma longibrachiatum UAMH 7956 and T. reesei QM6a				Xylaria	Xylaria		CC(C[C@@H]1NC(=O)[C@@]23[C@H]1[C@H](C)[C@H]1O[C@H]1[C@@H]3/C=C/C(=O)CCC/C=C/C2=O)C	C22H29NO4	371.47	27	0	0.68	2	4	1	106.61	75.77	2.46	2.71	2.22	1.84	2.77	2.40	-3.72	7.10e-02	1.91e-04	Soluble	-3.95	4.12e-02	1.11e-04	Soluble	-3.28	1.94e-01	5.21e-04	Soluble	High	Yes	Yes	No	No	No	No	No	-6.64
419	CC(C)C[C@H](N1)[C@]2([H])[C@H](C)[C@@H]3[C@@H](O3)[C@]([H])(/C=C/4)[C@]2(C(CCCCCC4=O)=O)C1=O	Lagambasines C			No antifungal ability against Trichoderma longibrachiatum UAMH 7956 and T. reesei QM6a				Xylaria	Xylaria		CC(C[C@@H]1NC(=O)[C@@]23[C@H]1[C@H](C)[C@H]1O[C@H]1[C@@H]3/C=C/C(=O)CCCCCC2=O)C	C22H31NO4	373.49	27	0	0.77	2	4	1	107.08	75.77	3.00	2.75	2.44	1.92	3.18	2.66	-3.76	6.55e-02	1.75e-04	Soluble	-4.00	3.77e-02	1.01e-04	Soluble	-3.75	6.64e-02	1.78e-04	Soluble	High	Yes	Yes	No	No	No	No	No	-6.63
420	CC(C)C[C@H](N1)[C@]2([H])[C@H](C)[C@@H]3[C@@H](O3)[C@]([H])(/C=C/4)[C@]2(C(C[C@@H](O)CCCC4=O)=O)C1=O	Lagambasines D			No antifungal ability against Trichoderma longibrachiatum UAMH 7956 and T. reesei QM6a				Xylaria	Xylaria		CC(C[C@@H]1NC(=O)[C@@]23[C@H]1[C@H](C)[C@H]1O[C@H]1[C@@H]3/C=C/C(=O)CCC[C@@H](CC2=O)O)C	C22H31NO5	389.49	28	0	0.77	2	5	2	108.24	96.00	2.58	1.59	1.42	1.11	2.28	1.80	-3.12	2.92e-01	7.51e-04	Soluble	-3.22	2.36e-01	6.07e-04	Soluble	-2.93	4.56e-01	1.17e-03	Soluble	High	No	Yes	No	No	No	No	No	-7.55
421	C[C@@H]1[C@@H](O)[C@H](/C=C/C[C@@H]2C)[C@@]3([C@H](OC(C)=O)[C@H](O4)[C@@H]4[C@@](C)(O)C2=O)[C@@]([C@H](CC5=CC=CC=C5)NC3=O)([H])[C@@]1(C)O	karyochalasin	Cytotoxic						Xylaria	Xylaria		CC(=O)O[C@@H]1[C@@H]2O[C@H]2[C@@](C)(O)C(=O)[C@H](C/C=C/[C@@H]2[C@]31C(=O)N[C@H]([C@@H]3[C@@]([C@@H]([C@H]2O)C)(C)O)Cc1ccccc1)C	C30H39NO8	541.63	39	6	0.63	4	8	4	145.83	145.69	2.67	1.45	0.94	0.93	1.99	1.60	-3.96	5.92e-02	1.09e-04	Soluble	-4.12	4.15e-02	7.67e-05	Moderately soluble	-4.18	3.55e-02	6.56e-05	Moderately soluble	Low	No	Yes	No	No	No	No	Yes	-8.57
422	CC1=C(C)[C@]([C@H](CC2=CC=CC=C2)NC3=O)([H])[C@]3([C@H](O)[C@H](O4)[C@@H]4[C@@](C)(O)C5=O)[C@@H](/C=C/C[C@@H]5C)[C@@H]1O	Deacetyl 19,20-epoxycytochalasin C	Cytotoxic						Xylaria	Xylaria		CC1=C(C)[C@H]2[C@H](Cc3ccccc3)NC(=O)[C@]32[C@H]([C@@H]1O)/C=C/C[C@H](C)C(=O)[C@]([C@H]1[C@H]([C@H]3O)O1)(C)O	C28H35NO6	481.58	35	6	0.57	2	6	4	134.42	119.39	2.81	0.77	1.32	1.30	2.35	1.71	-3.31	2.38e-01	4.95e-04	Soluble	-2.86	6.69e-01	1.39e-03	Soluble	-4.39	1.97e-02	4.09e-05	Moderately soluble	High	No	Yes	No	No	No	No	No	-8.69
423	C=C1[C@@H](O)[C@H](/C=C/C[C@@H]2C)[C@@]3([C@H](O)[C@H](O4)[C@@H]4[C@@](C)(O)C2=O)[C@@]([C@H](CC5=CC=CC=C5)NC3=O)([H])[C@@H]1C	Engleromycin							Xylaria	Xylaria		C=C1[C@@H](C)[C@H]2[C@H](Cc3ccccc3)NC(=O)[C@]32[C@H]([C@@H]1O)/C=C/C[C@H](C)C(=O)[C@]([C@H]1[C@H]([C@H]3O)O1)(C)O	C28H35NO6	481.58	35	6	0.57	2	6	4	134.42	119.39	3.02	1.34	1.18	1.30	2.25	1.82	-3.66	1.04e-01	2.16e-04	Soluble	-3.45	1.71e-01	3.56e-04	Soluble	-4.19	3.13e-02	6.50e-05	Moderately soluble	High	No	Yes	No	No	No	No	No	-8.29
424	C[C@]12[C@@H](O2)[C@H](/C=C/C[C@@H]3C)[C@@]4([C@H](O)[C@H](O5)[C@@H]5[C@@](C)(O)C3=O)[C@@]([C@H](CC6=CC=CC=C6)NC4=O)([H])[C@@H]1C	19,20-epoxycytochalasin Q							Xylaria	Xylaria		C[C@H]1C/C=C/[C@H]2[C@@H]3O[C@]3(C)[C@H]([C@@H]3[C@@]2([C@@H]([C@H]2[C@H]([C@@](C1=O)(C)O)O2)O)C(=O)N[C@H]3Cc1ccccc1)C	C28H35NO6	481.58	35	6	0.64	2	6	3	132.74	111.69	3.39	1.87	1.42	1.38	2.69	2.15	-4.00	4.83e-02	1.00e-04	Soluble	-3.84	7.01e-02	1.45e-04	Soluble	-4.48	1.58e-02	3.28e-05	Moderately soluble	High	No	Yes	No	No	No	Yes	No	-7.91
29	CC1=C[C@@](/C([H])=C(CCC(C([C@@]([C@@](O)(C2=O)[C@]3(O)[C@]4(C([C@@]5([H])O6)=C2C)[C@@]6([H])[C@@]([C@]5([H])C7=O)([H])[C@]([C@@H](CC/C(C)=C([H])/[C@@]8([H])C=C(C)[C@@H](C)[C@]([C@H](CC(C)C)N9)([H])[C@@]87C9=O)O)([H])O3)([H])C4C%10=O)=O)=O)\C)([H])[C@]%10(C(N[C@H]%11CC(C)C)=O)[C@@]%11([H])[C@@H]1C	Amichalasines A	Mild to potent cytotoxic effect against HL60, U87MG, MDA-MB-231, A549, Hep3B, and SW480 1.71 to 35.84						The marine derived fungus Aspergillus flavipes co-cultured with the actinomycete Streptomyces sp, isolated from Nanji Islands, sediments, China	Aspergillus		Error
30	CC1=C[C@@](/C([H])=C(CCCC([C@@]([C@@](O)(C2=O)[C@]3(O)[C@]4(C([C@@]5([H])O6)=C2C)[C@@]6([H])[C@@]([C@]5([H])C7=O)([H])[C@]([C@@H](CC/C(C)=C([H])/[C@@]8([H])C=C(C)[C@@H](C)[C@]([C@H](CC(C)C)N9)([H])[C@@]87C9=O)O)([H])O3)([H])C4C%10=O)=O)\C)([H])[C@]%10(C(N[C@H]%11CC(C)C)=O)[C@@]%11([H])[C@@H]1C	Amichalasines B	Mild to potent cytotoxic effect against HL60, U87MG, MDA-MB-231, A549, Hep3B, and SW480 1.71 to 35.85						The marine derived fungus Aspergillus flavipes co-cultured with the actinomycete Streptomyces sp, isolated from Nanji Islands, sediments, China	Aspergillus
64	CC1=C[C@@](/C([H])=C(CCC([C@@](O2)([H])[C@@]([C@](C3=O)(O)[C@]42[C@]5(C([C@@]6([H])O7)=C3C)[C@@]7([H])[C@@]([C@]6([H])C8=O)([H])[C@]([C@@H](CC/C(C)=C([H])/[C@@]9([H])C=C(C)[C@@H](C)[C@]([C@H](CC(C)C)N%10)([H])[C@@]98C%10=O)O)(O)O4)([H])C5C%11=O)=O)\C)([H])[C@]%11(C(N[C@H]%12CC(C)C)=O)[C@@]%12([H])[C@@H]1C	Amichalasines C	Mild to potent cytotoxic effect against HL60, U87MG, MDA-MB-231, A549, Hep3B, and SW480 1.71 to 35.86						The marine derived fungus Aspergillus flavipes co-cultured with the actinomycete Streptomyces sp, isolated from Nanji Islands, sediments, China	Aspergillus
74	O=C1N[C@@H](CC(C)C)[C@]2([H])[C@H](C)C(C)=C[C@H](/C=C(C)/CC[C@H]3O)[C@@]21C([C@@]([C@@H]4[C@@](C([C@]56O)=O)([C@@]([C@]76[H])([H])C([C@]89[C@@H](/C=C(C)/CC[C@@H](O)C7=O)C=C(C)[C@@H](C)[C@@]8([H])[C@H](CC(C)C)NC9=O)=O)C%10=C(C)C5=O)([H])[C@]([C@]%10([H])O4)([H])C3=O)=O	Asperchalasine A							The marine derived fungus Aspergillus flavipes co-cultured with the actinomycete Streptomyces sp, isolated from Nanji Islands, sediments, China	Aspergillus
75	CC1=C[C@@](/C([H])=C(C)/CC[C@@H](O)[C@@H](O)[C@@]([C@@]2([H])O[C@]3([H])[C@@]45C2=C(C)C([C@]([C@@]67[C@@]8(O)C(C(O)=C(C)[C@@]65[C@]9([H])[C@](C%10=O)([H])[C@]([C@@]7([H])O9)([H])[C@]([C@H](O)CC/C(C)=C([H])/[C@](C=C%11C)([H])[C@@](C%12=O)%10[C@@]([C@H](CC(C)C)N%12)([H])[C@@H]%11C)([H])O8)=O)(O)C4=O)=O)([H])[C@]3([H])C%13=O)([H])[C@@]%14%13[C@@]([C@H](CC(C)C)NC%14=O)([H])[C@@H]1C	Asperflavipines C	Potent cytotoxic effect against the HL60 from 5.67 to 18.75; apoptosis in HL60						The medicinal plant derived fungus Aspergillus micronesiensis, isolated from Phyllanthus glaucus roots, collected in China, from the Province of Jiangxi in the mountain of LuShan	Aspergillus	Undiscovered cytochalasan heterotetramers
76	CC1=C[C@@](/C([H])=C(C)/CC[C@@H](O)C([C@@]([C@@]2([H])O[C@]3([H])[C@@]45C2=C(C)C([C@]([C@@]67[C@@]8(O)C(C(O)=C(C)[C@@]65[C@]9([H])[C@](C%10=O)([H])[C@]([C@@]7([H])O9)([H])[C@]([C@H](O)CC/C(C)=C([H])/[C@](C=C%11C)([H])[C@@](C%12=O)%10[C@@]([C@H](CC(C)C)N%12)([H])[C@@H]%11C)([H])O8)=O)(O)C4=O)=O)([H])[C@]3([H])C%13=O)=O)([H])[C@@]%14%13[C@@]([C@H](CC(C)C)NC%14=O)([H])[C@@H]1C	Asperflavipines D	Potent cytotoxic effect against the HL60 from 5.67 to 18.76						The medicinal plant derived fungus Aspergillus micronesiensis, isolated from Phyllanthus glaucus roots, collected in China, from the Province of Jiangxi in the mountain of LuShan	Aspergillus	Undiscovered cytochalasan heterotetramers
92	CC1=C[C@@](/C([H])=C(C)/CCC([C@@H](O)[C@@]([C@@]2([H])O[C@]3([H])[C@@]45C2=C(C)C([C@]([C@@]67[C@@]8(O)C(C(O)=C(C)[C@@]65[C@]9([H])[C@](C%10=O)([H])[C@]([C@@]7([H])O9)([H])[C@](CCC/C(C)=C([H])/[C@](C=C%11C)([H])[C@@](C%12=O)%10[C@@]([C@H](CC(C)C)N%12)([H])[C@@H]%11C)([H])O8)=O)(O)C4=O)=O)([H])[C@]3([H])C%13=O)=O)([H])[C@@]%14%13[C@@]([C@H](CC(C)C)NC%14=O)([H])[C@@H]1C	Asperflavipines E	Potent cytotoxic effect against the HL60 from 5.67 to 18.77; strong cytotoxicity against Hep3B 5.60						The medicinal plant derived fungus Aspergillus micronesiensis, isolated from Phyllanthus glaucus roots, collected in China, from the Province of Jiangxi in the mountain of LuShan	Aspergillus	Undiscovered cytochalasan heterotetramers
93	[H][C@@]([C@]1(O2)[C@@H](/C=C/C[C@H](C)CCCC(C[C@@H](S[C@H](CC(CCC[C@@H](C)C/C=C/[C@@H]([C@@H]3O)[C@@]4(O5)[C@@]([C@H](CC6=CC=CC=C6)NC4=O)([H])[C@H](C)C3=C)=O)C5=O)C2=O)=O)[C@@H]7O)([C@H](CC8=CC=CC=C8)NC1=O)[C@H](C)C7=C	Thiocytochalasins C	Potent cytotoxicity against HepG2, MCF-7, A549, CT26, HT-29 from 0.76 to 7.52; significantly arrest cell cycle G2/M phase of CT26 cells at the concentration of 1						The plant endophytic derived fungus Phoma multirostrata XJ-2-1, isolated from Parasenecio albus collected in China from the Province of Xinning County, Hunan	Phoma	Homodimers epimers, formed through a thioether bridge
94	[H][C@@]([C@]1(O2)[C@@H](/C=C/C[C@H](C)CCCC(C[C@@H](S[C@@H](CC(CCC[C@@H](C)C/C=C/[C@@H]([C@@H]3O)[C@@]4(O5)[C@@]([C@H](CC6=CC=CC=C6)NC4=O)([H])[C@H](C)C3=C)=O)C5=O)C2=O)=O)[C@@H]7O)([C@H](CC8=CC=CC=C8)NC1=O)[C@H](C)C7=C	Thiocytochalasins D	Potent cytotoxicity against HepG2, MCF-7, A549, CT26, HT-29 from 0.76 to 7.52; significantly arrest cell cycle G2/M phase of CT26 cells at the concentration of 1						The plant endophytic derived fungus Phoma multirostrata XJ-2-1, isolated from Parasenecio albus collected in China from the Province of Xinning County, Hunan	Phoma	Homodimers epimers, formed through a thioether bridge
312	CC1=C(C)[C@@H](O)[C@@](/C=C/C[C@H](C)/C=C(C)/[C@@H](O)C([C@H]2[C@]3([H])C4=C5[C@](C=C(C[C@@H](O)CC6)[C@@]6(C)[C@@]5([H])CC[C@]4(C)C([C@H](C)/C=C/[C@@H](C(C)C)C)C3)([H])[C@@H]27)=O)([H])[C@@]8(C7=O)[C@@]1([C@H](CC9=CNC%10=CC=CC=C9%10)NC8=O)[H]	Ergochaeglobosins A	Weak cytotoxic effect against CT26 tumour of 39.1					Mild immunosuppressive effect towards LPS-induced B cells from 14.10 to 32.10 μmol/L; inhibition effect towards ConA-induced T cells, between 19.20 and 47.81	The plant derived fungus Chaeglobosin globosum P2-2-2, isolated from Ptychomitrium plant, collected in China, from the Province of Hubei	Chaetomium	Unusual heterodimers
313	CC1=C(C)[C@@H](O)[C@@](/C=C/C[C@H](C)/C=C(C)/C(C([C@]2([H])[C@@]3([H])C4=C5[C@@](C[C@@]([C@@H](/C=C/[C@H](C)C(C)C)C)([H])[C@@]5(C)CC[C@]4([H])[C@](CC[C@H](O)C6)(C)C6=C3)([H])[C@]27[H])=O)=O)([H])[C@@]8(C7=O)[C@@]1([C@H](CC9=CNC%10=CC=CC=C9%10)NC8=O)[H]	Ergochaeglobosins B						Mild immunosuppressive effect towards LPS-induced B cells from 14.10 to 32.10 μmol/L; inhibition effect towards ConA-induced T cells, between 19.20 and 47.81	The plant derived fungus Chaeglobosin globosum P2-2-2, isolated from Ptychomitrium plant, collected in China, from the Province of Hubei	Chaetomium	Unusual heterodimers
314	C[C@H]1[C@@]([H])([C@H](CC2=CNC3=CC=CC=C23)NC4=O)[C@]4(C5=O)[C@](/C=C/C[C@H](C)/C=C(C)/C(C([C@]6([H])[C@@]7([H])C8=C9[C@@](C[C@@]([C@@H](/C=C/[C@H](C)C(C)C)C)([H])[C@@]9(C)CC[C@]8([H])[C@](CC[C@H](O)C%10)(C)C%10=C7)([H])[C@]65[H])=O)=O)([H])[C@H](O)C1=C	Ergochaeglobosins C						Mild immunosuppressive effect towards LPS-induced B cells from 14.10 to 32.10 μmol/L; TRAIL-resistance-over-coming activity	The plant derived fungus Chaeglobosin globosum P2-2-2, isolated from Ptychomitrium plant, collected in China, from the Province of Hubei	Chaetomium	Unusual heterodimers
315	CC1=C(C)[C@@H](O)[C@]([H])(/C=C/C[C@H](C)/C=C2\C)[C@@]3(C(CC[C@H](O)C2=O)=O)[C@@]1([C@H](CC4=CN([C@@]5([H])CC[C@@]6(C)C(C=CC7=C(CC[C@]8([H])[C@H](C)/C=C/[C@H](C)C(C)C)[C@]8(C)CC[C@@]76[H])=C5)C9=CC=CC=C49)NC3=O)[H]	Ergochaeglobosins D						Mild immunosuppressive effect towards LPS-induced B cells from 14.10 to 32.10 μmol/L; inhibition effect towards ConA-induced T cells, between 19.20 and 47.81	The plant derived fungus Chaeglobosin globosum P2-2-2, isolated from Ptychomitrium plant, collected in China, from the Province of Hubei	Chaetomium	Unusual heterodimers
316	C[C@H]1[C@@]([H])([C@H](CC2=CN([C@@]3([H])CC[C@@]4(C)C(C=CC5=C(CC[C@]6([H])[C@H](C)/C=C/[C@H](C)C(C)C)[C@]6(C)CC[C@@]54[H])=C3)C7=CC=CC=C27)NC8=O)[C@]8(C(CC[C@H](O)C9=O)=O)[C@@]([H])(/C=C/C[C@H](C)/C=C9\C)[C@H](O)C1=C	Ergochaeglobosins E						Mild immunosuppressive effect towards LPS-induced B cells from 14.10 to 32.10 μmol/L	The plant derived fungus Chaeglobosin globosum P2-2-2, isolated from Ptychomitrium plant, collected in China, from the Province of Hubei	Chaetomium	Unusual heterodimers
[truncated: 46 more columns]
