# Supplementary material for: The cytochalasans: potent fungal natural products with application from bench to bedside
Source: Royal Society of Chemistry journal article supplement (doi:10.1039/d4np00076e), 2025-01-01
Supplement: d4np00076e2.pdf [file d4np00076e2.pdf]

# The Cytochalasans: Potent Fungal Natural Products with Applications from Bench to Bedside

Mohamed A. Tammam<sup>a</sup>, Florbela Pereira<sup>b</sup>, Elizabeth Skellam<sup>c</sup>, Stefan Bidula<sup>d</sup>, A. Ganesan<sup>d</sup>, and Amr El-Demerdash<sup>d,e,f\*</sup>

<sup>a</sup> Department of Biochemistry, Faculty of Agriculture, Fayoum University, Fayoum 63514, Egypt

<sup>b</sup> LAQV REQUIMTE, Department of Chemistry, NOVA School of Science and Technology, Universidade Nova de Lisboa, 2829516 Caparica, Portugal

<sup>c</sup> Department of Chemistry and BioDiscovery Institute, University of North Texas, 1155 Union Circle, Denton, TX, 76201, USA

<sup>d</sup> School of Chemistry, Pharmacy and Pharmacology, University of East Anglia, Norwich Research Park, Norwich NR4 7TJ, United Kingdom

<sup>e</sup> Division of Organic Chemistry, Department of Chemistry, Faculty of Sciences, Mansoura University, Mansoura 35516, Egypt

<sup>f</sup> Department of Biochemistry and Metabolism, the John Innes Centre, Norwich Research Park, Norwich NR4 7UH, UK

---

\*Corresponding author: Amr El-Demerdash (A.E-D), [A.Eldemerdash@uea.ac.uk](mailto:A.Eldemerdash@uea.ac.uk), [a\\_eldemerdash83@mans.edu.eg](mailto:a_eldemerdash83@mans.edu.eg); [Amr.El-Demerdash@jic.ac.uk](mailto:Amr.El-Demerdash@jic.ac.uk)

**Table 1:** List of cytochalasins reported and their Derivatives, exclusively isolated from Fungi.

| No. | <p style="text-align: center;"><b>Structure</b></p> <p style="text-align: center;"><b>MF</b></p> <p style="text-align: center;"><b>Name</b></p>                                | Source                                                                                                                                                                                                                                                                                                    | Bioactivity                                                                                                              | Reference  |
|-----|--------------------------------------------------------------------------------------------------------------------------------------------------------------------------------|-----------------------------------------------------------------------------------------------------------------------------------------------------------------------------------------------------------------------------------------------------------------------------------------------------------|--------------------------------------------------------------------------------------------------------------------------|------------|
| 1   | 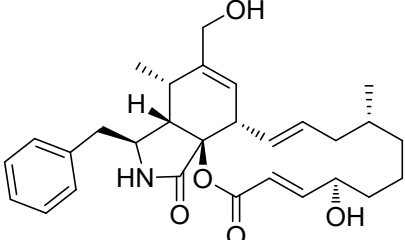 <p style="text-align: center;"><math>C_{29}H_{37}NO_5</math><br/>Cytochalasin Z2</p>         | <p><i>Aspergillus</i> sp. LE2, <i>Phoma exigua</i> var. <i>heteromorpha</i>, <i>Phoma exigua</i> var. <i>exigua</i>, <i>Pyrenophora semeniperda</i>, <i>Perenniporia subacida</i>, <i>Preussia similis</i> DSM 32328</p>                                                                                  | <p>Phytotoxic, Actin distriputation (incomplete at 5 <math>\mu</math>g/mL)</p>                                           | <p>1-6</p> |
| 2   |  <p style="text-align: center;"><math>C_{29}H_{37}NO_5</math><br/>Cytochalasin B</p>          | <p><i>Aspergillus</i> sp. LE2, <i>Boeremia exigua</i> (Desm.), <i>Phoma exigua</i> var. <i>heteromorpha</i>, <i>Phoma exigua</i> var. <i>exigua</i>, <i>Pyrenophora semeniperda</i>, <i>Sparticola triseptate</i>, <i>Perenniporia subacida</i>, <i>Preussia similis</i> DSM 32328, <i>Xylaria</i> sp</p> | <p>Phytotoxic, cytotoxic, nematocidal and antimicrobial, Actin distriputation (completely at 1 <math>\mu</math>g/mL)</p> | <p>1-9</p> |
| 3   |  <p style="text-align: center;"><math>C_{29}H_{39}NO_5</math><br/>Dihydrocytochalasin B</p> | <p><i>Aspergillus</i> sp. LE2, <i>Perenniporia subacida</i></p>                                                                                                                                                                                                                                           | <p>Not determined for any relevant biological activity</p>                                                               | <p>1,5</p> |

|   |                                                                                                                                                                        |                                |                                                      |   |
|---|------------------------------------------------------------------------------------------------------------------------------------------------------------------------|--------------------------------|------------------------------------------------------|---|
| 4 | 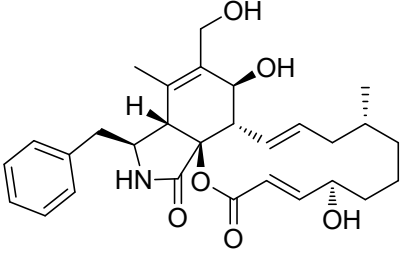 <p style="text-align: center;"><math>C_{29}H_{37}NO_6</math><br/>Perenniporin A</p>  | <i>Perenniporia subacida</i>   | Displayed cytotoxicity and no anti-inflammatory      | 5 |
| 5 |  <p style="text-align: center;"><math>C_{29}H_{37}NO_5</math><br/>Perenniporin B</p>  | <i>Perenniporia subacida</i>   | Displayed neither cytotoxicity nor anti-inflammatory | 5 |
| 6 |  <p style="text-align: center;"><math>C_{29}H_{37}NO_6</math><br/>Perenniporin C</p> | <i>Perenniporia subacida</i>   | Cytotoxicity, anti-inflammatory                      | 5 |
| 7 |                                                                                     | <i>Boeremia exigua</i> (Desm.) | Displayed anti-inflammatory and no cytotoxicity      | 7 |



|    |                                                                                                                                                                                                                                                                                            |                                |                                                      |   |
|----|--------------------------------------------------------------------------------------------------------------------------------------------------------------------------------------------------------------------------------------------------------------------------------------------|--------------------------------|------------------------------------------------------|---|
| 11 | 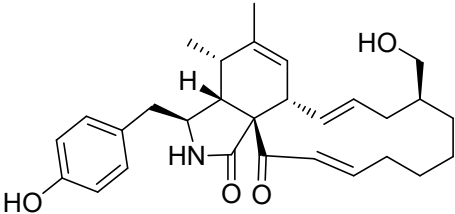 <p>Chemical structure of Boerechalsin E, a complex polycyclic molecule with a central ring system, a hydroxyl group, and a long side chain.</p> <p><math>C_{29}H_{37}NO_4</math><br/>Boerechalsin E</p>  | <i>Boeremia exigua</i> (Desm.) | Displayed anti-inflammatory and no cytotoxicity      | 7 |
| 12 |  <p>Chemical structure of Boerechalsin F, a complex polycyclic molecule with a central ring system, a hydroxyl group, and a long side chain.</p> <p><math>C_{25}H_{37}NO_6S</math><br/>Boerechalsin F</p> | <i>Boeremia exigua</i> (Desm.) | Displayed neither cytotoxicity nor anti-inflammatory | 7 |
| 13 |  <p>Chemical structure of Boerechalsin G, a complex polycyclic molecule with a central ring system, a hydroxyl group, and a long side chain.</p> <p><math>C_{36}H_{49}NO_8</math><br/>Boerechalsin G</p> | <i>Boeremia exigua</i> (Desm.) | Displayed neither cytotoxicity nor anti-inflammatory | 7 |

|    |                                                                                                                                                                                     |                                                                                                                                                                                            |                                                                                             |                                          |
|----|-------------------------------------------------------------------------------------------------------------------------------------------------------------------------------------|--------------------------------------------------------------------------------------------------------------------------------------------------------------------------------------------|---------------------------------------------------------------------------------------------|------------------------------------------|
| 14 | 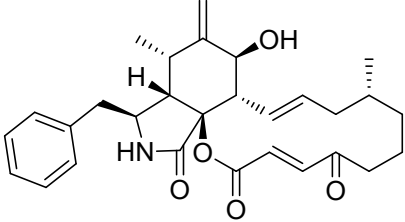 <p style="text-align: center;">C<sub>29</sub>H<sub>35</sub>NO<sub>5</sub><br/>Cytochalasin A</p>  | <p style="text-align: center;"><i>Aspergillus</i> sp. LE2, <i>Phoma exigua</i> var. <i>heteromorpha</i></p>                                                                                | <p style="text-align: center;">Nematicidal and antimicrobial</p>                            | <p style="text-align: center;">1,2,9</p> |
| 15 |  <p style="text-align: center;">C<sub>29</sub>H<sub>35</sub>NO<sub>5</sub><br/>Cytochalasin F</p>  | <p style="text-align: center;"><i>Phoma exigua</i> var. <i>heteromorpha</i>, <i>Phoma exigua</i> var. <i>exigua</i>, <i>Pyrenophora semeniperda</i>, <i>Preussia similis</i> DSM 32328</p> | <p style="text-align: center;">Phytotoxic, Actin distriputation (incomplete at 5 µg/mL)</p> | <p style="text-align: center;">2-4,6</p> |
| 16 |  <p style="text-align: center;">C<sub>29</sub>H<sub>37</sub>NO<sub>4</sub><br/>Cytochalasin T</p> | <p style="text-align: center;"><i>Phoma exigua</i> var. <i>heteromorpha</i>, <i>Pyrenophora semeniperda</i></p>                                                                            | <p style="text-align: center;">Phytotoxic</p>                                               | <p style="text-align: center;">2,4</p>   |
| 17 |  <p style="text-align: center;">C<sub>29</sub>H<sub>37</sub>NO<sub>5</sub></p>                   | <p style="text-align: center;"><i>Phoma exigua</i> var. <i>heteromorpha</i>, <i>Phoma exigua</i> var. <i>exigua</i>, <i>Pyrenophora semeniperda</i></p>                                    | <p style="text-align: center;">Phytotoxic</p>                                               | <p style="text-align: center;">2-4</p>   |

|    |                                                                                                                                                     |                                                                                                                                                            |                                                               |       |
|----|-----------------------------------------------------------------------------------------------------------------------------------------------------|------------------------------------------------------------------------------------------------------------------------------------------------------------|---------------------------------------------------------------|-------|
|    | Cytochalasin Z3                                                                                                                                     |                                                                                                                                                            |                                                               |       |
| 18 | 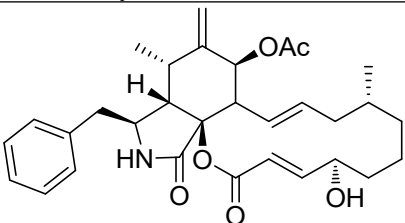 <p><math>C_{31}H_{39}NO_6</math><br/>7-O-acetylcytochalasin B</p> | <i>Phoma exigua</i> var. <i>heteromorpha</i>                                                                                                               | Not determined for any relevant biological activity           | 2     |
| 19 |  <p><math>C_{29}H_{37}NO_4</math><br/>Deoxaphomin</p>              | <i>Phoma exigua</i> var. <i>heteromorpha</i> , <i>Phoma exigua</i> var. <i>exigua</i> , <i>Pyrenophora semeniperda</i> , <i>Preussia similis</i> DSM 32328 | Phytotoxic, Actin distriputation (Completely at 1 $\mu$ g/mL) | 2-4,6 |
| 20 |  <p><math>C_{24}H_{37}NO_4</math><br/>Cytochalasin Z4</p>         | <i>Aspergillus</i> sp. LE2, <i>Phoma exigua</i> var. <i>heteromorpha</i>                                                                                   | Displayed no phytotoxicity                                    | 1,2   |
| 21 |                                                                  | <i>Phoma exigua</i> var. <i>heteromorpha</i>                                                                                                               | Displayed no phytotoxicity                                    | 2     |

|    |                                                                                                                                                                                                                                                                                                                                                                                                                                                                                                                                  |                                              |                                                      |    |
|----|----------------------------------------------------------------------------------------------------------------------------------------------------------------------------------------------------------------------------------------------------------------------------------------------------------------------------------------------------------------------------------------------------------------------------------------------------------------------------------------------------------------------------------|----------------------------------------------|------------------------------------------------------|----|
|    | <p><math>C_{29}H_{37}NO_6</math><br/>Cytochalasin Z5</p> 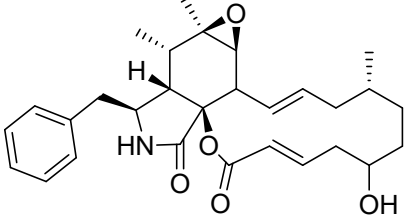 <p>The structure of Cytochalasin Z5 is a complex polycyclic molecule. It features a central bicyclic core with a hydroxyl group and a methyl group. Attached to this core are a phenylacetamido group, a long unsaturated side chain with a terminal hydroxyl group, and a methyl group. The overall structure is highly substituted and contains several stereocenters.</p>          |                                              |                                                      |    |
| 22 | <p><math>C_{29}H_{37}NO_5</math><br/>Cytochalasin Z6</p>  <p>The structure of Cytochalasin Z6 is similar to Z5 but lacks the terminal hydroxyl group on the long side chain. It has a different stereochemistry at the chiral centers, particularly at the position where the hydroxyl group was in Z5.</p>                                                                                                                                     | <i>Phoma exigua</i> var. <i>heteromorpha</i> | Phytotoxic                                           | 2  |
| 23 | <p><math>C_{38}H_{46}N_2O_9</math><br/>Phomachalasin A</p>  <p>The structure of Phomachalasin A is a very complex polycyclic molecule. It features a central bicyclic core with a hydroxyl group and a methyl group. Attached to this core are a phenylacetamido group, a long unsaturated side chain with a terminal hydroxyl group, and a methyl group. The overall structure is highly substituted and contains several stereocenters.</p> | <i>Phoma exigua</i> var. <i>exigua</i>       | Displayed neither<br>phytotoxicity nor<br>antifungal | 10 |
| 24 |  <p>This is a duplicate of the structure of Phomachalasin A shown in row 23.</p>                                                                                                                                                                                                                                                                                                                                                              | <i>Phoma exigua</i> var. <i>exigua</i>       | Displayed neither<br>phytotoxicity nor<br>antifungal | 10 |



|    |                                                                                                                                                                                                                                                                                                                                                                                                                                                                                                                                                                                                                                                            |                                 |                                                |    |
|----|------------------------------------------------------------------------------------------------------------------------------------------------------------------------------------------------------------------------------------------------------------------------------------------------------------------------------------------------------------------------------------------------------------------------------------------------------------------------------------------------------------------------------------------------------------------------------------------------------------------------------------------------------------|---------------------------------|------------------------------------------------|----|
|    | <p><math>C_{38}H_{46}N_2O_8</math><br/>Phomachalasin B</p> 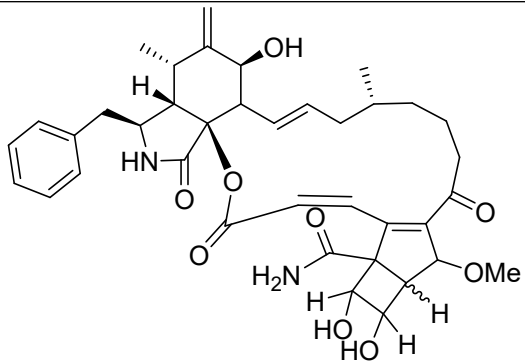 <p>The structure of Phomachalasin B is a complex polycyclic molecule. It features a central ring system with a methyl group, a hydroxyl group, and a phenylamino group. A long chain with a double bond and a methyl group is attached to the ring. A side chain contains a methyl group, a hydroxyl group, and a methyl group. The structure is highly substituted and contains multiple stereocenters.</p>                                                                                                  |                                 |                                                |    |
| 25 | <p><math>C_{38}H_{46}N_2O_9</math><br/>Phomachalasin C</p>  <p>The structure of Phomachalasin C is a complex polycyclic molecule, similar to Phomachalasin B but with an additional hydroxyl group. It features a central ring system with a methyl group, a hydroxyl group, and a phenylamino group. A long chain with a double bond and a methyl group is attached to the ring. A side chain contains a methyl group, a hydroxyl group, and a methyl group. The structure is highly substituted and contains multiple stereocenters.</p>                               | <i>Phoma exigua var. exigua</i> | Displayed neither phytotoxicity nor antifungal | 10 |
| 26 | <p><math>C_{38}H_{46}N_2O_9</math><br/>Phomachalasin D</p>  <p>The structure of Phomachalasin D is a complex polycyclic molecule, similar to Phomachalasin C but with a different stereochemistry at one of the hydroxyl groups. It features a central ring system with a methyl group, a hydroxyl group, and a phenylamino group. A long chain with a double bond and a methyl group is attached to the ring. A side chain contains a methyl group, a hydroxyl group, and a methyl group. The structure is highly substituted and contains multiple stereocenters.</p> | <i>Phoma exigua var. exigua</i> | Displayed neither phytotoxicity nor antifungal | 10 |

|    |                                                                                                                                                                                                                                                                                                                                                                                                                                                        |                                   |           |    |
|----|--------------------------------------------------------------------------------------------------------------------------------------------------------------------------------------------------------------------------------------------------------------------------------------------------------------------------------------------------------------------------------------------------------------------------------------------------------|-----------------------------------|-----------|----|
| 27 | 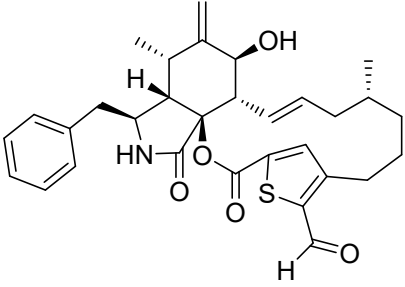 <p>Chemical structure of Thiocytochalasin A, a complex polyketide derivative. It features a central six-membered ring with a methyl group, a hydroxyl group, and a phenylamino group. This ring is linked to a thiophene ring, which is further substituted with a propyl chain and a formyl group.</p> <p><math>C_{31}H_{35}NO_5S</math><br/>Thiocytochalasin A</p> | <i>Phoma multirostrata</i> XJ-2-1 | Cytotoxic | 11 |
| 28 |  <p>Chemical structure of Thiocytochalasin B, similar to Thiocytochalasin A but with two methoxy groups instead of a formyl group on the thiophene ring.</p> <p><math>C_{33}H_{41}NO_6S</math><br/>Thiocytochalasin B</p>                                                                                                                                             | <i>Phoma multirostrata</i> XJ-2-1 | Cytotoxic | 11 |

|    |                                                                                                                                                                                                                                                                                                                                                                                                                                                                                                                                                                                                                                                                                                                                                                                      |                                   |           |    |
|----|--------------------------------------------------------------------------------------------------------------------------------------------------------------------------------------------------------------------------------------------------------------------------------------------------------------------------------------------------------------------------------------------------------------------------------------------------------------------------------------------------------------------------------------------------------------------------------------------------------------------------------------------------------------------------------------------------------------------------------------------------------------------------------------|-----------------------------------|-----------|----|
| 29 | 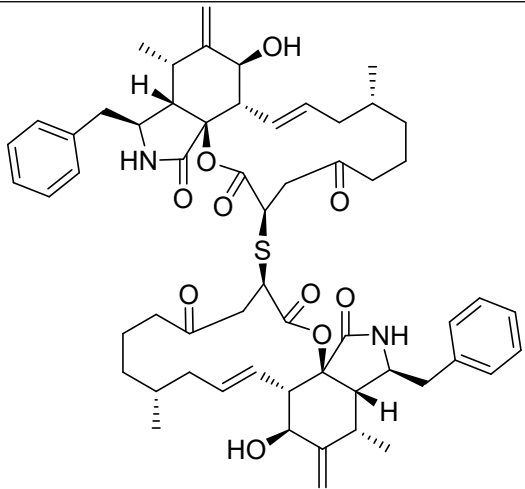 <p>The structure of Thiocytochalasin C is a complex polycyclic molecule. It features a central six-membered ring with a methyl group at the top and a hydroxyl group at the right. This ring is substituted with a benzylamino group (left), a long-chain side chain with a double bond and a ketone group (top-right), and a sulfur atom bonded to a cyclohexane ring (bottom). This cyclohexane ring is further substituted with a hydroxyl group (left), a methyl group (bottom), and a benzylamino group (right). The sulfur atom is also bonded to a long-chain side chain with a double bond and a ketone group (top).</p> <p><math>C_{58}H_{72}N_2O_{10}S</math><br/>Thiocytochalasin C</p> | <i>Phoma multirostrata</i> XJ-2-1 | Cytotoxic | 11 |
| 30 |  <p>The structure of Thiocytochalasin D is very similar to Thiocytochalasin C. It has the same core polycyclic framework. The main difference is the sulfur atom's bonding: in Thiocytochalasin D, the sulfur atom is bonded to two sulfur atoms (forming a disulfide bridge) instead of being bonded to a cyclohexane ring as in Thiocytochalasin C. The rest of the molecule, including the methyl, hydroxyl, and benzylamino groups, is identical to Thiocytochalasin C.</p> <p><math>C_{58}H_{72}N_2O_{10}S_2</math><br/>Thiocytochalasin D</p>                                                                                                                                                | <i>Phoma multirostrata</i> XJ-2-1 | Cytotoxic | 11 |

|    |                                                                                                                                                                                                                                                                                                                                               |                     |                           |    |
|----|-----------------------------------------------------------------------------------------------------------------------------------------------------------------------------------------------------------------------------------------------------------------------------------------------------------------------------------------------|---------------------|---------------------------|----|
| 31 | 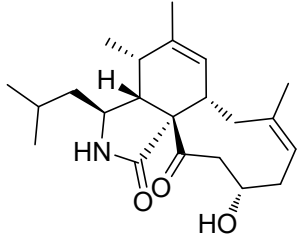 <p>Chemical structure of Periconiasin A, a complex polycyclic molecule with a central ring system, a methyl group, a hydroxyl group, and a side chain with a methyl group and a hydroxyl group.</p> <p><math>C_{22}H_{33}NO_3</math><br/>Periconiasin A</p> | <i>Periconia</i> sp | Cytotoxic                 | 12 |
| 32 |  <p>Chemical structure of Periconiasin B, similar to Periconiasin A but with a different side chain configuration.</p> <p><math>C_{22}H_{33}NO_3</math><br/>Periconiasin B</p>                                                                               | <i>Periconia</i> sp | Cytotoxic                 | 12 |
| 33 |  <p>Chemical structure of Periconiasin C, similar to Periconiasin A but with a different side chain configuration.</p> <p><math>C_{22}H_{31}NO_3</math><br/>Periconiasin C</p>                                                                              | <i>Periconia</i> sp | Displayed no cytotoxicity | 12 |

|    |                                                                                                                                                                                                                                                                                                                                                                                                                                |                     |                                                            |    |
|----|--------------------------------------------------------------------------------------------------------------------------------------------------------------------------------------------------------------------------------------------------------------------------------------------------------------------------------------------------------------------------------------------------------------------------------|---------------------|------------------------------------------------------------|----|
| 34 | 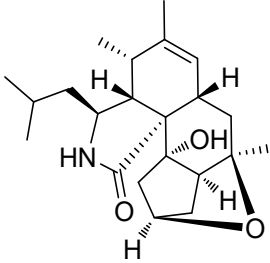 <p>Chemical structure of Periconiasin D, a complex polycyclic molecule with a decalin core, a piperidine ring, and a cyclopentane ring. It features a methyl group, an isobutyl group, a hydroxyl group, and a nitro group. Stereochemistry is indicated with wedges and dashes.</p> <p><math>C_{22}H_{33}NO_3</math><br/>Periconiasin D</p> | <i>Periconia</i> sp | Displayed no cytotoxicity, anti-inflammatory and anti-HIV  | 13 |
| 35 |  <p>Chemical structure of Periconiasin E, similar to Periconiasin D but with a different stereochemistry at the C-10 position, where the hydroxyl group is on a double bond.</p> <p><math>C_{22}H_{33}NO_3</math><br/>Periconiasin E</p>                                                                                                      | <i>Periconia</i> sp | Displayed no cytotoxicity, anti-inflammatory and anti-HIV  | 13 |
| 36 |  <p>Chemical structure of Periconiasin F, similar to Periconiasin D but with a different stereochemistry at the C-10 position, where the hydroxyl group is on a double bond and there is an additional methyl group at C-11.</p> <p><math>C_{22}H_{33}NO_3</math><br/>Periconiasin F</p>                                                     | <i>Periconia</i> sp | Displayed anti-HIV, no cytotoxicity, and anti-inflammatory | 13 |

|    |                                                                                                                                                                             |                     |                                                 |    |
|----|-----------------------------------------------------------------------------------------------------------------------------------------------------------------------------|---------------------|-------------------------------------------------|----|
| 37 | 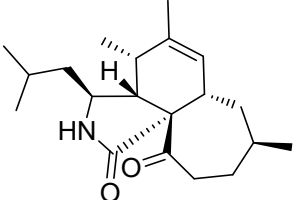 <p data-bbox="492 406 694 478"> <math>C_{20}H_{31}NO_2</math><br/> Periconiasin G </p>    | <i>Periconia</i> sp | Displayed anti-HIV, and no cytotoxicity         | 14 |
| 38 |  <p data-bbox="492 853 694 925"> <math>C_{27}H_{41}NO_6S</math><br/> Periconiasin H </p>   | <i>Periconia</i> sp | Displayed neither anti-HIV, nor cytotoxicity    | 14 |
| 39 |  <p data-bbox="492 1149 694 1236"> <math>C_{22}H_{33}NO_4</math><br/> Periconiasin I </p> | <i>Periconia</i> sp | Displayed cytotoxicity and no anti-HIV activity | 15 |

|    |                                                                                                                                                                                 |                                |                                         |    |
|----|---------------------------------------------------------------------------------------------------------------------------------------------------------------------------------|--------------------------------|-----------------------------------------|----|
| 40 | 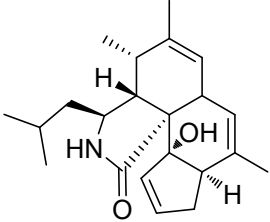 <p data-bbox="504 430 683 486"> <math>C_{22}H_{31}NO_2</math><br/> Periconiasin J </p>        | <i>Periconia sp</i>            | Displayed anti-HIV, and no cytotoxicity | 15 |
| 41 |  <p data-bbox="481 734 705 790"> <math>C_{29}H_{37}NO_4</math><br/> Cytochalasin Z1 </p>       | <i>Pyrenophora semeniperda</i> | Phytotoxic                              | 4  |
| 42 |  <p data-bbox="481 1029 705 1085"> <math>C_{25}H_{35}NO_5</math><br/> Pycnidiophorone A </p>  | <i>Pycnidiophora dispersa</i>  | Cytotoxic                               | 16 |
| 43 |  <p data-bbox="470 1316 716 1372"> <math>C_{27}H_{37}NO_6</math><br/> Pycnidiophorone B </p> | <i>Pycnidiophora dispersa</i>  | Cytotoxic                               | 16 |

|    |                                                                                                                                                                             |                               |                                                       |    |
|----|-----------------------------------------------------------------------------------------------------------------------------------------------------------------------------|-------------------------------|-------------------------------------------------------|----|
| 44 | 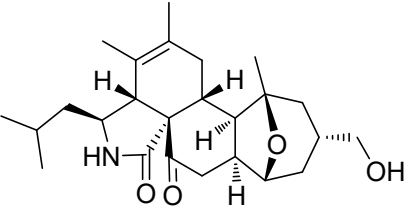 <p style="text-align: center;"> <math>C_{25}H_{37}NO_4</math><br/> Pycnidiophorone C </p> | <i>Pycnidiophora dispersa</i> | Cytotoxic                                             | 16 |
| 45 |  <p style="text-align: center;"> <math>C_{27}H_{37}NO_5</math><br/> Pycnidiophorone D </p> | <i>Pycnidiophora dispersa</i> | Cytotoxic                                             | 16 |
| 46 |  <p style="text-align: center;"> <math>C_{29}H_{37}NO_4</math><br/> Deoxaphomin B </p>     | <i>Sparticola triseptate</i>  | Cytotoxic,<br>Antiproliferative, Protein<br>inhibitor | 8  |



|    |                                                                                                                                                                                                                                                                                                                                                                                                                                                                |                               |                                                       |    |
|----|----------------------------------------------------------------------------------------------------------------------------------------------------------------------------------------------------------------------------------------------------------------------------------------------------------------------------------------------------------------------------------------------------------------------------------------------------------------|-------------------------------|-------------------------------------------------------|----|
| 47 | 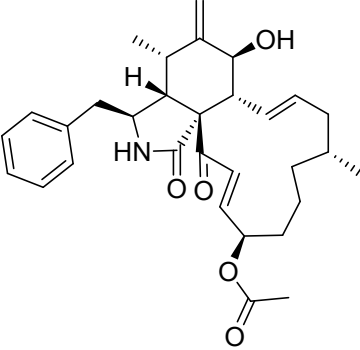 <p>Chemical structure of Triseptatin, a complex polyketide derivative. It features a central ring system with a methyl group, a hydroxyl group, and a benzylamino group. A side chain contains a double bond, a methyl group, and an acetate ester. Stereochemistry is indicated with wedges and dashes.</p> <p><math>C_{31}H_{39}NO_5</math><br/>Triseptatin</p>            | <i>Sparticola triseptate</i>  | Cytotoxic,<br>Antiproliferative, Protein<br>inhibitor | 8  |
| 48 |  <p>Chemical structure of 18-Oxo-19,20-dihydrophomacin C. It consists of a bicyclic core with a methyl group, a hydroxyl group, and an isobutylamino group. A side chain includes a double bond, a methyl group, a ketone, and a hydroxyl group. Stereochemistry is shown with wedges and dashes.</p> <p><math>C_{25}H_{37}NO_4</math><br/>18-Oxo-19,20-dihydrophomacin C</p> | <i>Westerdykella dispersa</i> | Displayed no<br>cytotoxicity and<br>antibacterial     | 17 |
| 49 |  <p>Chemical structure of 18-Oxo-19-methoxy-19,20-dihydrophomacin C. It is similar to the previous structure but includes a methoxy group on the side chain. Stereochemistry is indicated with wedges and dashes.</p> <p><math>C_{26}H_{39}NO_5</math><br/>18-Oxo-19-methoxy-19,20-dihydrophomacin C</p>                                                                     | <i>Westerdykella dispersa</i> | Displayed no<br>cytotoxicity and<br>antibacterial     | 17 |

|    |                                                                                                                                                                                                                        |                                                               |                                                                       |       |
|----|------------------------------------------------------------------------------------------------------------------------------------------------------------------------------------------------------------------------|---------------------------------------------------------------|-----------------------------------------------------------------------|-------|
| 50 | 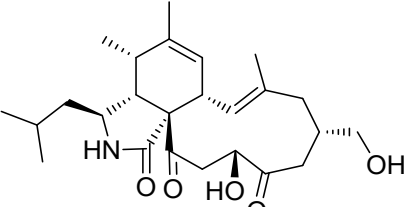 <p style="text-align: center;"> <math>C_{25}H_{37}NO_5</math><br/>           18-Oxo-19-hydroxyl-19,20-dihydrophomacin C         </p> | <i>Westerdykella dispersa</i>                                 | Displayed no cytotoxicity and antibacterial                           | 17    |
| 51 |  <p style="text-align: center;"> <math>C_{25}H_{39}NO_4</math><br/>           19,20-Dihydrophomacin C         </p>                    | <i>Westerdykella dispersa</i>                                 | Displayed cytotoxicity and no antibacterial                           | 17    |
| 52 |  <p style="text-align: center;"> <math>C_{26}H_{41}NO_5</math><br/>           19-Methoxy-19,20-dihydrophomacin C         </p>        | <i>Westerdykella dispersa</i>                                 | Displayed cytotoxicity and no antibacterial                           | 17    |
| 53 |  <p style="text-align: center;"> <math>C_{25}H_{39}NO_5</math> </p>                                                                 | <i>Westerdykella dispersa</i> ,<br><i>Westerdykella nigra</i> | Displayed cytotoxicity, enzyme inhibition effect and no antibacterial | 17,18 |

|    | 19-Hydroxyl-19,20- dihydrophomacin C                                                                                                                                   |                                                               |                                                                             |       |
|----|------------------------------------------------------------------------------------------------------------------------------------------------------------------------|---------------------------------------------------------------|-----------------------------------------------------------------------------|-------|
| 54 | 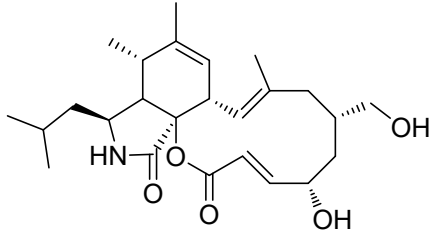 <p>C<sub>25</sub>H<sub>37</sub>NO<sub>5</sub><br/>Phomacin B</p>                     | <i>Westerdykella dispersa</i> ,<br><i>Westerdykella nigra</i> | Displayed cytotoxicity,<br>enzyme inhibition effect<br>and no antibacterial | 17,18 |
| 55 |  <p>C<sub>25</sub>H<sub>37</sub>NO<sub>4</sub><br/>16-Hydroxymethylaspergillin PZ</p> | <i>Westerdykella dispersa</i> ,<br><i>Westerdykella nigra</i> | Antibacterial and<br>enzyme inhibition effect                               | 18,19 |
| 56 |  <p>C<sub>25</sub>H<sub>37</sub>NO<sub>4</sub><br/>16α-methylaspochalasin J</p>      | <i>Westerdykella dispersa</i>                                 | Antibacterial                                                               | 19    |

|    |                                                                                                                                                                                                                                                                                                                                                                                                                                                                                                                                                                                                                                                                  |                                   |                          |       |
|----|------------------------------------------------------------------------------------------------------------------------------------------------------------------------------------------------------------------------------------------------------------------------------------------------------------------------------------------------------------------------------------------------------------------------------------------------------------------------------------------------------------------------------------------------------------------------------------------------------------------------------------------------------------------|-----------------------------------|--------------------------|-------|
| 57 | 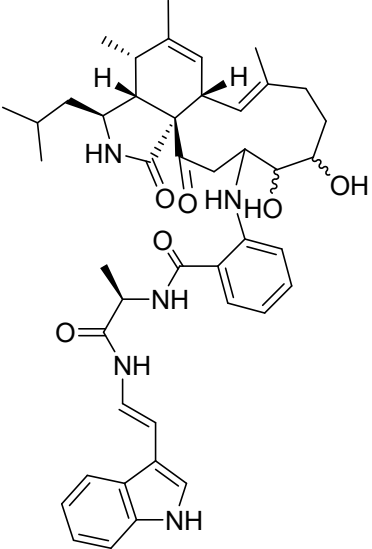 <p>The chemical structure of Aspochalamin A is a complex polycyclic molecule. It features a large macrocyclic core with multiple stereocenters, indicated by wedged and dashed bonds. Attached to this core are several side chains, including a branched alkyl chain, a hydroxyl group, and a chain containing an amide and a secondary amine. A prominent feature is a long chain ending in a tryptophan-like indole ring system, which is connected to the macrocycle via a double bond and an amide linkage.</p> <p><math>C_{44}H_{55}N_5O_6</math><br/>Aspochalamin A</p> | <i>Aspergillus niveus</i> LU 9575 | Cytotoxic, antibacterial | 20,21 |
| 58 |  <p>This is an identical copy of the chemical structure of Aspochalamin A, showing the same complex polycyclic core, side chains, and tryptophan-like indole moiety as described in entry 57.</p>                                                                                                                                                                                                                                                                                                                                                                              | <i>Aspergillus niveus</i> LU 9575 | Cytotoxic, antibacterial | 20,21 |

|    |                                                                                                                             |                                   |                          |       |
|----|-----------------------------------------------------------------------------------------------------------------------------|-----------------------------------|--------------------------|-------|
|    | $C_{44}H_{55}N_5O_6$<br>Aspochalamin B                                                                                      |                                   |                          |       |
| 59 | 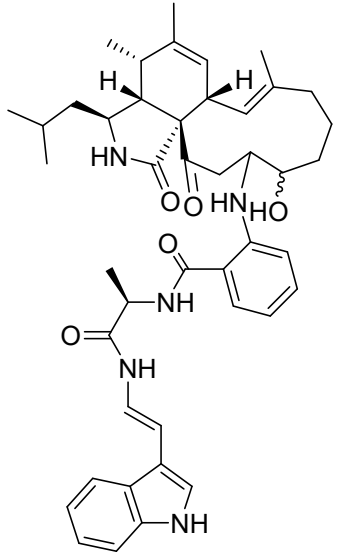<br>$C_{44}H_{55}N_5O_5$<br>Aspochalamin C | <i>Aspergillus niveus</i> LU 9575 | Cytotoxic, antibacterial | 20,21 |

|    |                                                                                                                                                                                                                                                                                                                                                                                                |                                                                                                                                                                                    |                                                 |       |
|----|------------------------------------------------------------------------------------------------------------------------------------------------------------------------------------------------------------------------------------------------------------------------------------------------------------------------------------------------------------------------------------------------|------------------------------------------------------------------------------------------------------------------------------------------------------------------------------------|-------------------------------------------------|-------|
| 60 | 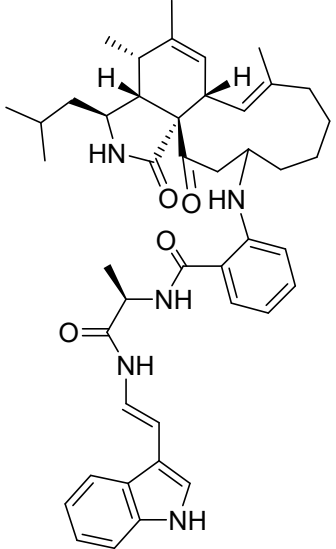 <p>Chemical structure of Aspochalamin D, a complex polyketide with a decalin core, multiple amide and ester groups, and a long side chain. The structure is shown with stereochemistry indicated by wedges and dashes.</p> <p><math>C_{44}H_{55}N_5O_4</math><br/>Aspochalamin D</p>                         | <i>Aspergillus niveus</i> LU 9575                                                                                                                                                  | Cytotoxic, antibacterial                        | 20,21 |
| 61 |  <p>Chemical structure of Aspochalasin D, a complex polyketide with a decalin core, multiple amide and ester groups, and a long side chain with two hydroxyl groups. The structure is shown with stereochemistry indicated by wedges and dashes.</p> <p><math>C_{24}H_{35}NO_4</math><br/>Aspochalasin D</p> | <i>Aspergillus niveus</i> LU 9575,<br><i>Aspergillus micronesiensis</i><br>PG-1, <i>Trichoderma gamsii</i> ,<br><i>Spicaria elegans</i> ,<br><i>Aspergillus flavipes</i> (KIB-536) | Displayed cytotoxicity,<br>and no antibacterial | 20–27 |
| 62 |  <p>Chemical structure of Aspochalamin D, a complex polyketide with a decalin core, multiple amide and ester groups, and a long side chain. The structure is shown with stereochemistry indicated by wedges and dashes.</p> <p><math>C_{24}H_{35}NO_2</math></p>                                            | <i>Aspergillus niveus</i> LU 9575                                                                                                                                                  | Cytotoxic, antibacterial                        | 20,21 |

|    |                                                                                                                                                                                                                         |                                                                                 |           |       |
|----|-------------------------------------------------------------------------------------------------------------------------------------------------------------------------------------------------------------------------|---------------------------------------------------------------------------------|-----------|-------|
| 63 | <p style="text-align: center;">Aspochalasin Z</p> 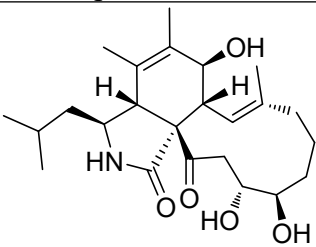 <p style="text-align: center;"><math>C_{24}H_{37}NO_5</math><br/>Aspochalasin U</p> | <i>Aspergillus</i> sp                                                           | Cytotoxic | 28    |
| 64 |  <p style="text-align: center;"><math>C_{57}H_{72}N_2O_{12}</math><br/>Asperchalasine A</p>                                           | <i>Aspergillus flavipes</i> (507),<br><i>Aspergillus micronesiensis</i><br>PG-1 | Cytotoxic | 22,29 |

|    |                                                                                                                                                |                                   |           |    |
|----|------------------------------------------------------------------------------------------------------------------------------------------------|-----------------------------------|-----------|----|
| 65 | 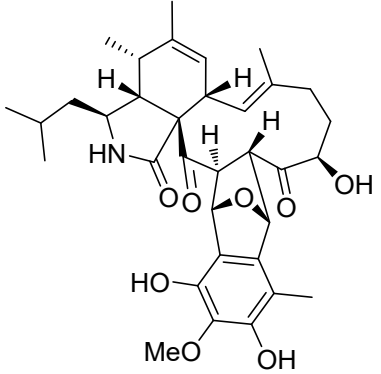 <p> <math>C_{34}H_{43}NO_8</math><br/> Asperchalsine B </p>  | <i>Aspergillus flavipes</i> (507) | Cytotoxic | 29 |
| 66 |  <p> <math>C_{35}H_{45}NO_7</math><br/> Asperchalsine C </p> | <i>Aspergillus flavipes</i> (507) | Cytotoxic | 29 |



|    |                                                                                                                                                                                                                                                                                                                                                                                                                                                                                                                                                                         |                                                                                                             |                                                     |       |
|----|-------------------------------------------------------------------------------------------------------------------------------------------------------------------------------------------------------------------------------------------------------------------------------------------------------------------------------------------------------------------------------------------------------------------------------------------------------------------------------------------------------------------------------------------------------------------------|-------------------------------------------------------------------------------------------------------------|-----------------------------------------------------|-------|
| 67 | 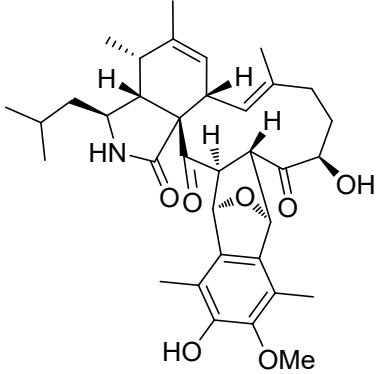 <p>Chemical structure of Asperchalsine D, a complex polycyclic molecule with multiple stereocenters, a lactone ring, and a substituted benzene ring. The structure includes a decalin core with a lactone bridge, a methyl group, and a hydroxyl group. A side chain contains a secondary amine and a methyl group. The benzene ring is substituted with a hydroxyl group and a methoxy group.</p> <p><math>C_{35}H_{45}NO_7</math><br/>Asperchalsine D</p>                           | <i>Aspergillus flavipes</i> (507)                                                                           | Cytotoxic                                           | 29    |
| 68 |  <p>Chemical structure of Rosellichalasin, a complex polycyclic molecule featuring a decalin core, a lactone ring, and a side chain with a phenyl group and a methyl group. The structure includes a decalin core with a lactone bridge, a methyl group, and a hydroxyl group. A side chain contains a secondary amine and a methyl group. The benzene ring is substituted with a hydroxyl group and a methoxy group.</p> <p><math>C_{28}H_{33}NO_5</math><br/>Rosellichalasin</p>     | <i>Aspergillus flavipes</i> ,<br><i>Arthrinium arundinis</i> ZSDS1-F3,<br><i>Arthrinium arundinis</i> DJ-13 | Displayed neither cytotoxicity nor antituberculosis | 30-32 |
| 69 |  <p>Chemical structure of Aspochalasin E, a complex polycyclic molecule with multiple stereocenters, a lactone ring, and a side chain with a methyl group and a hydroxyl group. The structure includes a decalin core with a lactone bridge, a methyl group, and a hydroxyl group. A side chain contains a secondary amine and a methyl group. The benzene ring is substituted with a hydroxyl group and a methoxy group.</p> <p><math>C_{24}H_{37}NO_5</math><br/>Aspochalasin E</p> | <i>Aspergillus flavipes</i> ,<br><i>Aspergillus flavipes</i> CNL-338                                        | Not determined for any relevant biological activity | 30,33 |

|    |                                                                                                                                                                                         |                                                                                                                                        |                                                           |             |
|----|-----------------------------------------------------------------------------------------------------------------------------------------------------------------------------------------|----------------------------------------------------------------------------------------------------------------------------------------|-----------------------------------------------------------|-------------|
| 70 | 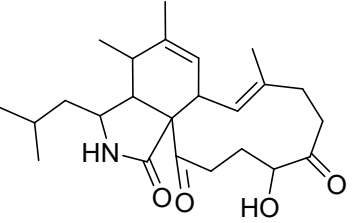 <p style="text-align: center;"> <math>C_{24}H_{35}NO_4</math><br/> Aspochalasin M </p>                | <i>Aspergillus flavipes</i> ,<br><i>Aspergillus flavipes</i> CNL-338,<br><i>Trichoderma gamsii</i> , <i>Spicaria</i><br><i>elegans</i> | Cytotoxicity                                              | 23,26,30,33 |
| 71 |  <p style="text-align: center;"> <math>C_{24}H_{35}NO_4</math><br/> Aspochalasin P </p>                | <i>Aspergillus flavipes</i> ,<br><i>Trichoderma gamsii</i> , <i>Spicaria</i><br><i>elegans</i>                                         | Displayed no<br>cytotoxicity                              | 23,26,30    |
| 72 |  <p style="text-align: center;"> <math>C_{24}H_{37}NO_4</math><br/> 19,20-Dihydro-aspochalasin D </p> | <i>Aspergillus flavipes</i>                                                                                                            | Not determined for any<br>relevant biological<br>activity | 30          |
| 73 |  <p style="text-align: center;"> <math>C_{24}H_{35}NO_5</math> </p>                                  | <i>Aspergillus flavipes</i>                                                                                                            | Not determined for any<br>relevant biological<br>activity | 30          |

|    | Aspochalasin H                                                                                                                                 |                                           |           |    |
|----|------------------------------------------------------------------------------------------------------------------------------------------------|-------------------------------------------|-----------|----|
| 74 | 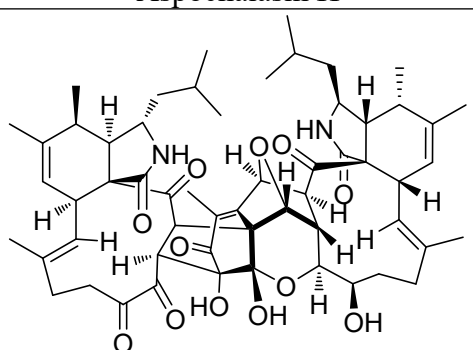 <p><math>C_{57}H_{72}N_2O_{12}</math><br/>Amichalasin A</p>  | <i>Aspergillus micronesiensis</i><br>PG-1 | Cytotoxic | 22 |
| 75 |  <p><math>C_{57}H_{74}N_2O_{11}</math><br/>Amichalasin B</p> | <i>Aspergillus micronesiensis</i><br>PG-1 | Cytotoxic | 22 |

|    |                                                                                                                                                                                |                                           |                                                     |    |
|----|--------------------------------------------------------------------------------------------------------------------------------------------------------------------------------|-------------------------------------------|-----------------------------------------------------|----|
| 76 | 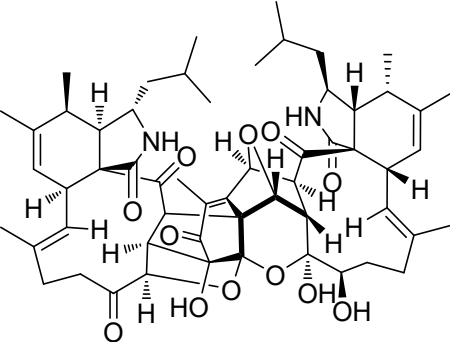 <p data-bbox="481 550 705 614"> <math>C_{57}H_{72}N_2O_{12}</math><br/> Asperchalasin C </p> | <i>Aspergillus micronesiensis</i><br>PG-1 | Cytotoxic                                           | 22 |
| 77 |  <p data-bbox="481 845 705 909"> <math>C_{24}H_{35}NO_4</math><br/> Aspochalasin C </p>       | <i>Aspergillus flavipes</i> CNL-338       | Not determined for any relevant biological activity | 33 |
| 78 |  <p data-bbox="515 1149 672 1212"> <math>C_{24}H_{35}NO_3</math><br/> TMC-169 </p>           | <i>Aspergillus flavipes</i> CNL-338       | Not determined for any relevant biological activity | 33 |

|    |                                                                                                                                                                                                                                                                                                                            |                                                                    |                                                     |       |
|----|----------------------------------------------------------------------------------------------------------------------------------------------------------------------------------------------------------------------------------------------------------------------------------------------------------------------------|--------------------------------------------------------------------|-----------------------------------------------------|-------|
| 79 | 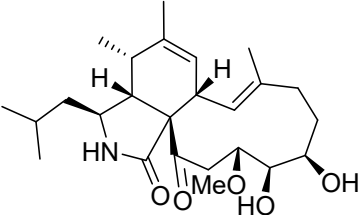 <p>Chemical structure of Flavichalasin F, a complex polycyclic molecule with a decalin core, a methyl group, a methylamino group, a methoxy group, and two hydroxyl groups.</p> <p><math>C_{25}H_{39}NO_5</math><br/>Flavichalasin F</p> | <i>Aspergillus flavipes</i> CNL-338                                | Not determined for any relevant biological activity | 33    |
| 80 |  <p>Chemical structure of Flavichalasin G, similar to Flavichalasin F but with a different side chain.</p> <p><math>C_{24}H_{37}NO_4</math><br/>Flavichalasin G</p>                                                                       | <i>Aspergillus flavipes</i> CNL-338                                | Not determined for any relevant biological activity | 33    |
| 81 |  <p>Chemical structure of Aspergillin PZ, a complex polycyclic molecule with a decalin core, a methyl group, a methylamino group, a hydroxyl group, and a cyclic ether ring.</p> <p><math>C_{24}H_{35}NO_4</math><br/>Aspergillin PZ</p> | <i>Aspergillus flavipes</i> CNL-338,<br><i>Trichoderma gamsii</i>  | Displayed no cytotoxicity                           | 33,34 |
| 82 |  <p>Chemical structure of Spicaria elegans, a complex polycyclic molecule with a decalin core, a methyl group, a methylamino group, a hydroxyl group, and a cyclic ether ring.</p> <p><math>C_{24}H_{33}NO_4</math></p>                 | <i>Spicaria elegans</i> ,<br><i>Aspergillus flavipes</i> (KIB-536) | Cytotoxicity                                        | 26,27 |

|    |                                                                                                                                                                                                                              |                                       |                                       |    |
|----|------------------------------------------------------------------------------------------------------------------------------------------------------------------------------------------------------------------------------|---------------------------------------|---------------------------------------|----|
| 83 | <p style="text-align: center;">Aspochalasin B</p> 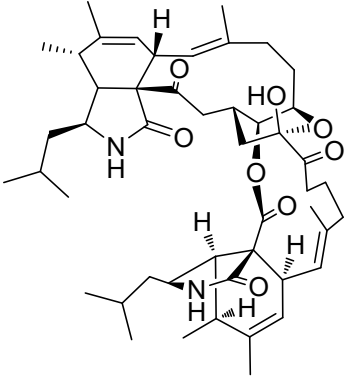 <p style="text-align: center;"><math>C_{48}H_{68}N_2O_8</math><br/>Bisaspochalasin A</p> | <i>Aspergillus flavipes</i> (KIB-536) | Displayed immunosuppressive effect    | 27 |
| 84 |  <p style="text-align: center;"><math>C_{48}H_{68}N_2O_8S</math><br/>Bisaspochalasin B</p>                                                 | <i>Aspergillus flavipes</i> (KIB-536) | Displayed no immunosuppressive effect | 27 |

|    |                                                                                                                                                                                   |                                       |                                       |    |
|----|-----------------------------------------------------------------------------------------------------------------------------------------------------------------------------------|---------------------------------------|---------------------------------------|----|
| 85 | 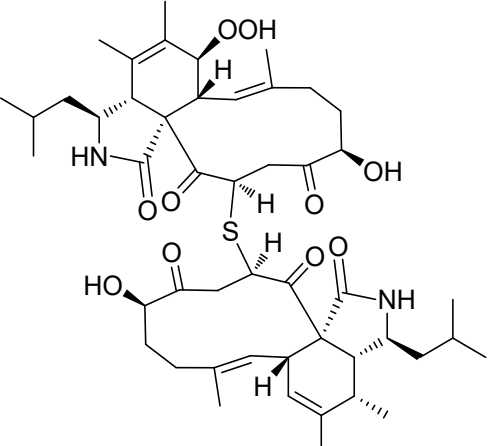 <p style="text-align: center;"> <math>C_{48}H_{68}N_2O_{10}S</math><br/> Bisaspochalasin C </p> | <i>Aspergillus flavipes</i> (KIB-536) | Displayed no immunosuppressive effect | 27 |
| 86 |  <p style="text-align: center;"> <math>C_{30}H_{37}NO_5</math><br/> Asporychalasin </p>          | <i>Aspergillus oryzae</i>             | Cytotoxic                             | 35 |
| 87 |  <p style="text-align: center;"> <math>C_{24}H_{33}NO_3</math><br/> Aspermichalasin A </p>     | <i>Aspergillus micronesiensis</i>     | Displayed no cytotoxicity             | 36 |

|    |                                                                                                                                                  |                                   |           |    |
|----|--------------------------------------------------------------------------------------------------------------------------------------------------|-----------------------------------|-----------|----|
| 88 | 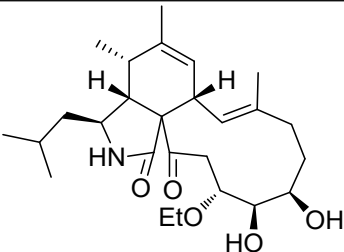 <p> <math>C_{26}H_{41}NO_5</math><br/> Aspermichalasin B </p>  | <i>Aspergillus micronesiensis</i> | Cytotoxic | 36 |
| 89 |  <p> <math>C_{25}H_{39}NO_5</math><br/> Aspermichalasin C </p>  | <i>Aspergillus micronesiensis</i> | Cytotoxic | 36 |
| 90 |  <p> <math>C_{25}H_{39}NO_4</math><br/> Aspermichalasin D </p> | <i>Aspergillus micronesiensis</i> | Cytotoxic | 36 |



|    |                                                                                                                                                                                 |                                   |                      |    |
|----|---------------------------------------------------------------------------------------------------------------------------------------------------------------------------------|-----------------------------------|----------------------|----|
| 91 | 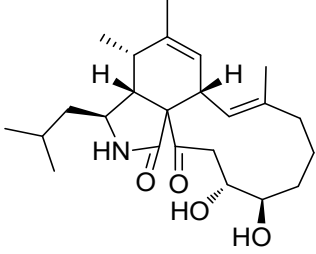 <p style="text-align: center;"> <math>C_{24}H_{37}NO_4</math><br/> Aspermichalasin E </p>     | <i>Aspergillus micronesiensis</i> | Cytotoxic            | 36 |
| 92 |  <p style="text-align: center;"> <math>C_{66}H_{82}N_2O_{16}</math><br/> Asperflavipine C </p> | <i>Aspergillus micronesiensis</i> | Cytotoxic, apoptosis | 36 |
| 93 |  <p style="text-align: center;"> <math>C_{66}H_{80}N_2O_{16}</math> </p>                      | <i>Aspergillus micronesiensis</i> | Cytotoxic            | 36 |

|    |                                                                                                                                                                                                                                  |                                   |                                                  |    |
|----|----------------------------------------------------------------------------------------------------------------------------------------------------------------------------------------------------------------------------------|-----------------------------------|--------------------------------------------------|----|
| 94 | <p style="text-align: center;">Asperflavipine D</p> 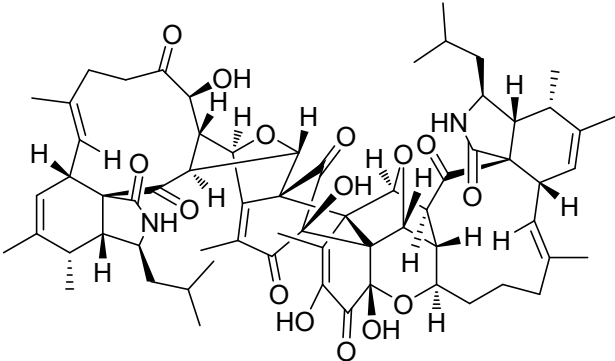 <p style="text-align: center;"><math>C_{66}H_{80}N_2O_{15}</math><br/>Asperflavipine E</p> | <i>Aspergillus micronesiensis</i> | Cytotoxic                                        | 36 |
| 95 |  <p style="text-align: center;"><math>C_{29}H_{37}NO_5</math><br/>Aspergicytochalasin A</p>                                                     | <i>Aspergillus</i> sp. LE2        | Displayed anti-inflammatory and no antibacterial | 1  |
| 96 |  <p style="text-align: center;"><math>C_{29}H_{37}NO_6</math><br/>Aspergicytochalasin B</p>                                                    | <i>Aspergillus</i> sp. LE2        | Displayed no antibacterial and anti-inflammatory | 1  |

|     |                                                                                                                                                                                            |                            |                                                  |   |
|-----|--------------------------------------------------------------------------------------------------------------------------------------------------------------------------------------------|----------------------------|--------------------------------------------------|---|
| 97  | 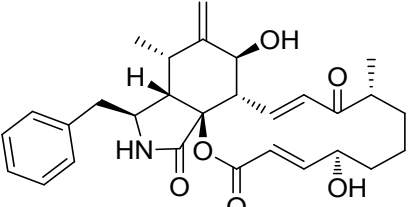 <p style="text-align: center;">C<sub>29</sub>H<sub>35</sub>NO<sub>6</sub><br/>Aspergicytochalasin C</p>  | <i>Aspergillus</i> sp. LE2 | Antibacterial, anti-inflammatory                 | 1 |
| 98  |  <p style="text-align: center;">C<sub>29</sub>H<sub>37</sub>NO<sub>6</sub><br/>Aspergicytochalasin D</p>  | <i>Aspergillus</i> sp. LE2 | Displayed antibacterial and no anti-inflammatory | 1 |
| 99  |  <p style="text-align: center;">C<sub>29</sub>H<sub>37</sub>NO<sub>6</sub><br/>Aspergicytochalasin E</p> | <i>Aspergillus</i> sp. LE2 | Displayed anti-inflammatory no antibacterial     | 1 |
| 100 |                                                                                                         | <i>Aspergillus</i> sp. LE2 | Displayed anti-inflammatory and no antibacterial | 1 |

|     |                                                                                                                                                                                                                                                                                                                                |                                                                                                                                                                                                                                                                       |                                |           |    |
|-----|--------------------------------------------------------------------------------------------------------------------------------------------------------------------------------------------------------------------------------------------------------------------------------------------------------------------------------|-----------------------------------------------------------------------------------------------------------------------------------------------------------------------------------------------------------------------------------------------------------------------|--------------------------------|-----------|----|
|     | $C_{29}H_{39}NO_6$<br>Aspergicytochalasin F                                                                                                                                                                                                                                                                                    |                                                                                                                                                                                                                                                                       |                                |           |    |
| 101 | 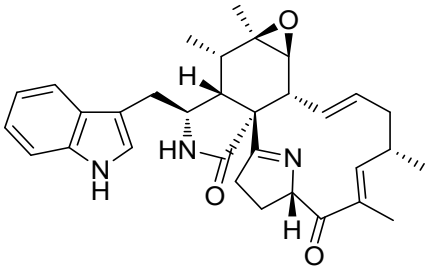 <p>The structure shows a complex polycyclic molecule with a central bicyclic core, a fused indole ring system, and a long side chain containing a double bond and a hydroxyl group. Stereochemistry is indicated with wedges and dashes.</p> | <i>Penicillium</i> sp. OUPS-79                                                                                                                                                                                                                                        | Cytotoxic                      | 37        |    |
| 102 | $C_{32}H_{37}N_3O_3$<br>Penochalasin D                                                                                                                                                                                                                                                                                         |  <p>The structure is similar to Aspergicytochalasin F but features a different side chain configuration, including a hydroxyl group and a different arrangement of double bonds.</p> | <i>Penicillium</i> sp. OUPS-79 | Cytotoxic | 37 |
| 103 | $C_{32}H_{38}N_2O_5$<br>Penochalasin E                                                                                                                                                                                                                                                                                         |  <p>The structure is similar to Penochalasin D but has a different side chain configuration, including a hydroxyl group and a different arrangement of double bonds.</p>            | <i>Penicillium</i> sp. OUPS-79 | Cytotoxic | 37 |
|     | $C_{32}H_{38}N_2O_5$<br>Penochalasin F                                                                                                                                                                                                                                                                                         |  <p>The structure is identical to Penochalasin E.</p>                                                                                                                              | <i>Penicillium</i> sp. OUPS-79 | Cytotoxic | 37 |

|     |                                                                                                                                                                                                                                                                                                                                                |                                                                                                                              |                                                                         |              |
|-----|------------------------------------------------------------------------------------------------------------------------------------------------------------------------------------------------------------------------------------------------------------------------------------------------------------------------------------------------|------------------------------------------------------------------------------------------------------------------------------|-------------------------------------------------------------------------|--------------|
| 104 | 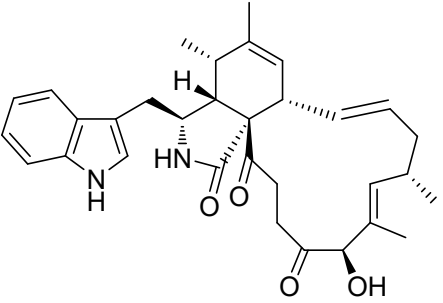 <p>Chemical structure of Penochalasin G, a complex polyketide with a central bicyclic core, a tryptophan-derived side chain, and a long unsaturated side chain with a terminal hydroxyl group.</p> <p><math>C_{32}H_{38}N_2O_4</math><br/>Penochalasin G</p> | <p><i>Penicillium</i> sp. OUPS-79,<br/><i>Chaetomium globosum</i><br/>C2F17, <i>Chaetomium</i><br/><i>globosum</i> kz-19</p> | <p>Displayed cytotoxicity<br/>and no anti-tuberculosis<br/>activity</p> | <p>37–39</p> |
| 105 |  <p>Chemical structure of Penochalasin H, similar to Penochalasin G but with an additional hydroxyl group on the central bicyclic core.</p> <p><math>C_{32}H_{38}N_2O_5</math><br/>Penochalasin H</p>                                                         | <p><i>Penicillium</i> sp. OUPS-79</p>                                                                                        | <p>Cytotoxic</p>                                                        | <p>37</p>    |
| 106 |  <p>Chemical structure of Chaetoglobosin O, similar to Penochalasin H but with a different side chain configuration.</p> <p><math>C_{32}H_{38}N_2O_5</math><br/>Chaetoglobosin O</p>                                                                         | <p><i>Penicillium</i> sp. OUPS-79</p>                                                                                        | <p>Cytotoxic</p>                                                        | <p>37</p>    |

|     |                                                                                                                                                                                                                                                                                                                                                      |                                                      |                                                         |    |
|-----|------------------------------------------------------------------------------------------------------------------------------------------------------------------------------------------------------------------------------------------------------------------------------------------------------------------------------------------------------|------------------------------------------------------|---------------------------------------------------------|----|
| 107 | 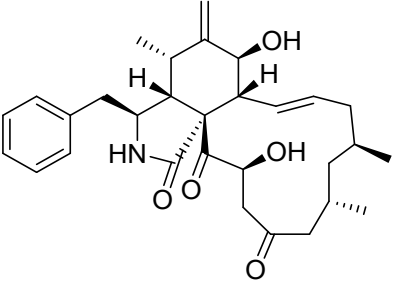 <p>Chemical structure of Talachalasin A, a complex polycyclic molecule with a benzyl group, a hydroxyl group, and a methyl group. The structure is shown with stereochemistry (wedges and dashes).</p> <p><math>C_{30}H_{39}NO_5</math><br/>Talachalasin A</p>     | <p><i>Talaromyces muroii</i> sp.<br/>SCSIO 40439</p> | <p>Displayed cytotoxicity<br/>and no antiviral</p>      | 40 |
| 108 |  <p>Chemical structure of Talachalasin B, similar to Talachalasin A but with a hydroxyl group on the benzyl ring. The structure is shown with stereochemistry (wedges and dashes).</p> <p><math>C_{30}H_{39}NO_4</math><br/>Talachalasin B</p>                      | <p><i>Talaromyces muroii</i> sp.<br/>SCSIO 40439</p> | <p>Displayed cytotoxicity<br/>and antiviral</p>         | 40 |
| 109 |  <p>Chemical structure of Talachalasin C, similar to Talachalasin A but with a methoxy group and a hydroxyl group on the benzyl ring. The structure is shown with stereochemistry (wedges and dashes).</p> <p><math>C_{30}H_{39}NO_6</math><br/>Talachalasin C</p> | <p><i>Talaromyces muroii</i> sp.<br/>SCSIO 40439</p> | <p>Displayed neither<br/>cytotoxicity nor antiviral</p> | 40 |

|     |                                                                                                                                                         |                                                                     |                                                           |         |
|-----|---------------------------------------------------------------------------------------------------------------------------------------------------------|---------------------------------------------------------------------|-----------------------------------------------------------|---------|
| 110 | 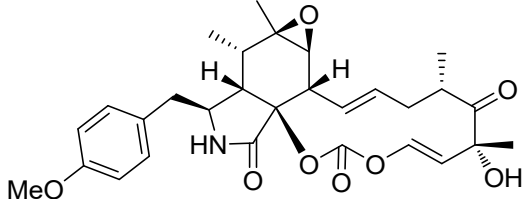 <p> <math>C_{29}H_{35}NO_8</math><br/> Phenochalasin B </p>           | <i>Botryotinia fuckeliana</i> A-S-3,<br><i>Daldinia concentrica</i> | Cytotoxic,<br>apoptosis, nematicidal<br>and antimicrobial | 9,41,42 |
| 111 |  <p> <math>C_{29}H_{37}NO_8</math><br/> [1,3]-Dioxacyclotridecino </p> | <i>Botryotinia fuckeliana</i> A-S-3                                 | Displayed no<br>cytotoxicity                              | 41      |
| 112 |  <p> <math>C_{29}H_{35}NO_6</math><br/> [12]-Cytochalasin </p>         | <i>Botryotinia fuckeliana</i> A-S-3                                 | Cytotoxic,<br>Apoptosis                                   | 41      |
| 113 |  <p> <math>C_{28}H_{37}NO_5</math><br/> Cytochalasin Z10 </p>        | <i>Endothia gyrosa</i> IFB-E023                                     | Cytotoxicity                                              | 43      |

|     |                                                                                                                                                                                        |                                                                                                                                                                                                                                                                    |                                                                                                                                      |            |
|-----|----------------------------------------------------------------------------------------------------------------------------------------------------------------------------------------|--------------------------------------------------------------------------------------------------------------------------------------------------------------------------------------------------------------------------------------------------------------------|--------------------------------------------------------------------------------------------------------------------------------------|------------|
| 114 | 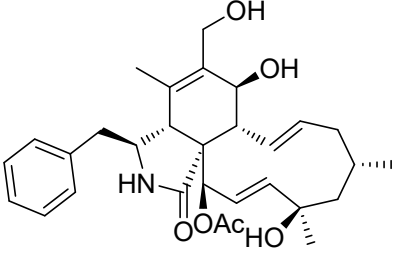 <p style="text-align: center;">C<sub>30</sub>H<sub>39</sub>NO<sub>6</sub><br/>Cytochalasin Z11</p>   | <i>Endothia gyrosa</i> IFB-E023                                                                                                                                                                                                                                    | Cytotoxicity                                                                                                                         | 43         |
| 115 |  <p style="text-align: center;">C<sub>30</sub>H<sub>39</sub>NO<sub>5</sub><br/>Epoxyctochalasin H</p> | <i>Endothia gyrosa</i> IFB-E023,<br><i>Phomopsis</i> sp. xy22                                                                                                                                                                                                      | Cytotoxicity                                                                                                                         | 43,44      |
| 116 |  <p style="text-align: center;">C<sub>30</sub>H<sub>39</sub>NO<sub>5</sub><br/>Cytochalasin H</p>    | <i>Endothia gyrosa</i> IFB-E023,<br><i>Diaporthe ueckerae</i> SC-J0123,<br><i>Diaporthe</i> cf. <i>ueckeri</i> ,<br><i>Phomopsis</i> sp. xy22,<br><i>Phomopsis theicola</i> ,<br><i>Phomopsis</i> sp. shj2,<br><i>Hypoxyton fragiforme</i> , H.<br><i>howeanum</i> | Cytotoxicity,<br>antagonism,<br>antimigratory, no anti-<br>inflammatory effect,<br>nematicidal,<br>antimicrobial, and<br>antibiofilm | 9,43–49    |
| 117 |  <p style="text-align: center;">C<sub>28</sub>H<sub>37</sub>NO<sub>4</sub></p>                      | <i>Endothia gyrosa</i> IFB-E023,<br><i>Diaporthe ueckerae</i> SC-J0123,<br><i>Diaporthe</i> cf. <i>ueckeri</i> ,<br><i>Phomopsis</i> sp. shj2,<br><i>Phomopsis</i> sp. xy22                                                                                        | Cytotoxicity,<br>nematicidal, and<br>antimicrobial                                                                                   | 9,43–46,50 |



|     |                                                                                                                                                        |                                                             |                                                    |       |
|-----|--------------------------------------------------------------------------------------------------------------------------------------------------------|-------------------------------------------------------------|----------------------------------------------------|-------|
|     | Cytochalasin J                                                                                                                                         |                                                             |                                                    |       |
| 118 | 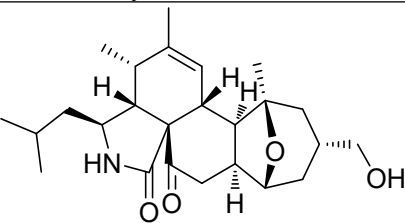 <p>C<sub>25</sub>H<sub>37</sub>NO<sub>4</sub><br/>Cytochrysin A</p>  | <i>Cytospora chrysosperma</i>                               | Displayed antibacterial and no antifungal activity | 51    |
| 119 |  <p>C<sub>25</sub>H<sub>37</sub>NO<sub>4</sub><br/>Cytochrysin B</p>  | <i>Cytospora chrysosperma</i>                               | Displayed no antibacterial and antifungal activity | 51    |
| 120 |  <p>C<sub>26</sub>H<sub>41</sub>NO<sub>5</sub><br/>Cytochrysin C</p> | <i>Cytospora chrysosperma</i>                               | Displayed antibacterial and no antifungal activity | 51    |
| 121 |  <p>C<sub>28</sub>H<sub>37</sub>NO<sub>3</sub></p>                  | <i>Diaporthe</i> sp. SC-J0138,<br><i>Phomopsis</i> sp. xy21 | Cytotoxicity                                       | 44,52 |

|     | 21-O-deacetyl-L-696,474                                                                                                                                                                                                                                                                                                                                                                                                 |                                                                |                                                   |       |
|-----|-------------------------------------------------------------------------------------------------------------------------------------------------------------------------------------------------------------------------------------------------------------------------------------------------------------------------------------------------------------------------------------------------------------------------|----------------------------------------------------------------|---------------------------------------------------|-------|
| 122 | 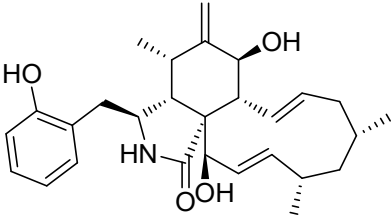 <p>Chemical structure of Phomopsichalasin G, a complex polycyclic molecule with a central six-membered ring, a fused seven-membered ring, and a side chain containing a hydroxyl group and a hydroperoxide group. It features a benzylamino group at the 21-position.</p> <p><math>C_{28}H_{37}NO_4</math><br/>Phomopsichalasin G</p> | <i>Diaporthe</i> sp. SC-J0138,<br><i>Phomopsis</i> sp. xy21    | Cytotoxicity                                      | 44,52 |
| 123 |  <p>Chemical structure of Diaporthichalasin A, similar to Phomopsichalasin G but with a para-hydroxybenzylamino group at the 21-position.</p> <p><math>C_{28}H_{37}NO_4</math><br/>Diaporthichalasin A</p>                                                                                                                             | <i>Diaporthe</i> sp. SC-J0138,<br><i>Hypoxyylon fragiforme</i> | Cytotoxicity,<br>antibacterial and<br>antibiofilm | 52,53 |
| 124 |  <p>Chemical structure of Diaporthichalasin B, similar to Phomopsichalasin G but with a para-hydroxybenzylamino group at the 21-position.</p> <p><math>C_{28}H_{37}NO_4</math><br/>Diaporthichalasin B</p>                                                                                                                            | <i>Diaporthe</i> sp. SC-J0138,<br><i>Phomopsis</i> sp. xy21    | Cytotoxicity                                      | 44,52 |
| 125 |  <p>Chemical structure of 21-O-deacetyl-L-696,474, similar to Phomopsichalasin G but with a phenylmethylamino group at the 21-position and a hydroxyl group on the seven-membered ring.</p> <p><math>C_{28}H_{37}NO_4</math></p>                                                                                                     | <i>Diaporthe</i> sp. SC-J0138                                  | Cytotoxicity                                      | 52    |

|     |                                                                                                                                                  |                               |                           |    |
|-----|--------------------------------------------------------------------------------------------------------------------------------------------------|-------------------------------|---------------------------|----|
|     | Diaporthichalasin C                                                                                                                              |                               |                           |    |
| 126 | 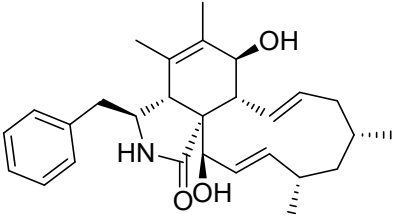 <p><math>C_{28}H_{37}NO_3</math><br/>Diaporthichalasin C</p>   | <i>Diaporthe</i> sp. SC-J0138 | Cytotoxicity              | 52 |
| 127 |  <p><math>C_{28}H_{37}NO_4</math><br/>Diaporthichalasin D</p>   | <i>Diaporthe</i> sp. SC-J0138 | Cytotoxicity              | 52 |
| 128 |  <p><math>C_{28}H_{37}NO_4</math><br/>Diaporthichalasin E</p>  | <i>Diaporthe</i> sp. SC-J0138 | Cytotoxicity              | 52 |
| 129 |  <p><math>C_{28}H_{37}NO_4</math><br/>Diaporthichalasin F</p> | <i>Diaporthe</i> sp. SC-J0138 | Displayed no cytotoxicity | 52 |

|     |                                                                                                                                         |                                                                  |                                                         |       |
|-----|-----------------------------------------------------------------------------------------------------------------------------------------|------------------------------------------------------------------|---------------------------------------------------------|-------|
|     | $C_{28}H_{37}NO_4$<br>Diaporthichalasin G                                                                                               |                                                                  |                                                         |       |
| 130 | 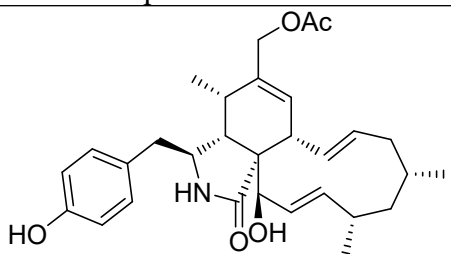<br>$C_{30}H_{39}NO_5$<br>Diaporthichalasin H          | <i>Diaporthe</i> sp. SC-J0138                                    | Cytotoxicity                                            | 52    |
| 131 | <br>$C_{29}H_{39}NO_4$<br>Cytochalasin J <sub>1</sub>  | <i>Diaporthe ueckerae</i> SC-J0123,<br><i>Phomopsis</i> sp. shj2 | Antimigratory                                           | 45,48 |
| 132 | <br>$C_{28}H_{35}NO_3$<br>Cytochalasin J <sub>2</sub> | <i>Diaporthe ueckerae</i> SC-J0123                               | Was not determined for any relevant biological activity | 45    |

|     |                                                                                                                                                                                                |                                                                                                 |                                              |          |
|-----|------------------------------------------------------------------------------------------------------------------------------------------------------------------------------------------------|-------------------------------------------------------------------------------------------------|----------------------------------------------|----------|
| 133 | 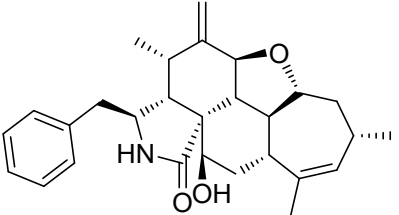 <p data-bbox="492 422 694 486"> <math>C_{28}H_{35}NO_3</math><br/>           Cytochalasin J<sub>3</sub> </p> | <i>Diaporthe ueckerae</i> SC-J0123                                                              | Displayed no antibacterial                   | 45       |
| 134 |  <p data-bbox="492 721 694 785"> <math>C_{30}H_{37}NO_4</math><br/>           Longichalasin B         </p>    | <i>Diaporthe ueckerae</i> SC-J0123                                                              | Displayed no antibacterial                   | 45       |
| 135 |  <p data-bbox="492 1035 694 1099"> <math>C_{30}H_{39}NO_4</math><br/>           RKS-1778         </p>        | <i>Diaporthe ueckerae</i> SC-J0123,<br><i>Phomopsis theicola</i> ,<br><i>Phomopsis</i> sp. shj2 | Displayed antimigratory and no antibacterial | 45,47,48 |
| 136 |                                                                                                             | <i>Diaporthe ueckerae</i> SC-J0123,<br><i>Phomopsis</i> sp. shj2                                | Antibacterial                                | 45,50    |

|     |                                                                                                                              |                                    |                                          |    |
|-----|------------------------------------------------------------------------------------------------------------------------------|------------------------------------|------------------------------------------|----|
|     | $C_{28}H_{37}NO_4$<br>Phomopchalasin A                                                                                       |                                    |                                          |    |
| 137 | 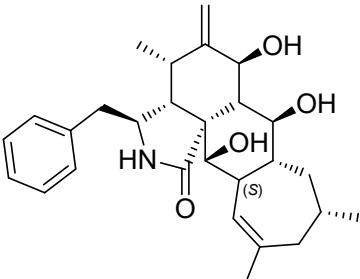<br>$C_{28}H_{37}NO_4$<br>Ueckerchalsin A   | <i>Diaporthe ueckerae</i> SC-J0123 | Displayed no antibacterial, cytotoxicity | 45 |
| 138 | <br>$C_{28}H_{37}NO_4$<br>Ueckerchalsin B   | <i>Diaporthe ueckerae</i> SC-J0123 | Displayed no antibacterial, cytotoxicity | 45 |
| 139 | <br>$C_{28}H_{35}NO_3$<br>Ueckerchalsin C | <i>Diaporthe ueckerae</i> SC-J0123 | Antibacterial, cytotoxicity              | 45 |

|     |                                                                                                                                                  |                                    |                                             |    |
|-----|--------------------------------------------------------------------------------------------------------------------------------------------------|------------------------------------|---------------------------------------------|----|
| 140 | 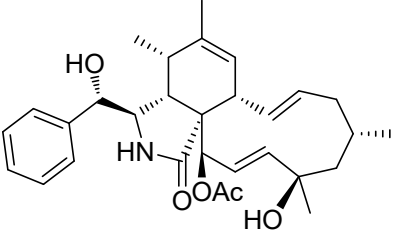 <p>Ueckerchalsin D</p> $C_{30}H_{39}NO_5$                      | <i>Diaporthe ueckerae</i> SC-J0123 | Displayed cytotoxicity and no antibacterial | 45 |
| 141 |  <p>Ueckerchalsin E</p> $C_{30}H_{39}NO_5$                      | <i>Diaporthe ueckerae</i> SC-J0123 | Displayed cytotoxicity and no antibacterial | 45 |
| 142 |  <p>4'-hydroxycytochalsin J<sub>3</sub></p> $C_{28}H_{35}NO_4$ | <i>Diaporthe ueckerae</i> SC-J0123 | Displayed no antibacterial, cytotoxicity    | 45 |
| 143 |  <p>Phomopsis sp. shj2</p> $C_{28}H_{35}NO_4$                 | <i>Phomopsis</i> sp. shj2          | Antimigratory                               | 50 |

|     |                                                                                         |                           |                                                   |    |
|-----|-----------------------------------------------------------------------------------------|---------------------------|---------------------------------------------------|----|
|     | Phomopchalasin B                                                                        |                           |                                                   |    |
| 144 | <p>Phomopchalasin B</p> $\text{C}_{30}\text{H}_{39}\text{NO}_6$ <p>Phomopchalasin C</p> | <i>Phomopsis</i> sp. shj2 | Anti-inflammatory, cytotoxicity and antimigratory | 50 |
| 145 | <p>Phomopsichalasin F</p> $\text{C}_{28}\text{H}_{37}\text{NO}_3$                       | <i>Phomopsis</i> sp. xy21 | Cytotoxicity                                      | 44 |
| 146 | <p>18-Deoxycytochalasin H (7, L-696,474)</p> $\text{C}_{30}\text{H}_{39}\text{NO}_3$    | <i>Phomopsis</i> sp. xy22 | Cytotoxicity                                      | 44 |
| 147 | <p>Phomopchalasin B</p> $\text{C}_{30}\text{H}_{39}\text{NO}_6$                         | <i>Phomopsis</i> sp. xy22 | Displayed no cytotoxicity                         | 44 |



|     |                                                                                                                                                                                             |                            |                                                      |    |
|-----|---------------------------------------------------------------------------------------------------------------------------------------------------------------------------------------------|----------------------------|------------------------------------------------------|----|
|     | Phomopsichalasin D                                                                                                                                                                          |                            |                                                      |    |
| 148 | 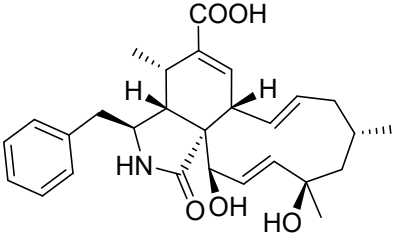 <p>COOH</p> <p>HN</p> <p>OOH</p> <p>HO</p> <p><math>C_{30}H_{39}NO_6</math></p> <p>Phomopsichalasin E</p> | <i>Phomopsis</i> sp. xy22  | Cytotoxicity                                         | 44 |
| 149 |  <p>HN</p> <p>OOAc</p> <p>HO</p> <p><math>C_{30}H_{39}NO_5</math></p> <p>Cytochalasin N</p>                | <i>Phomopsis theicola</i>  | Anti-inflammatory and no antagonism                  | 47 |
| 150 |  <p>HN</p> <p>OOAc</p> <p>HO</p> <p><math>C_{30}H_{37}NO_5</math></p> <p>Phomocytochalasin</p>            | <i>Phomopsis theicola</i>  | Displayed no anti-inflammatory and antagonism effect | 47 |
| 151 |  <p>HN</p> <p>OOH</p> <p>OH</p>                                                                          | <i>Phomopsis</i> sp. sh917 | Displayed no cytotoxicity and anti-inflammatory      | 54 |

|     |                                                                                                                          |                            |                                                                 |    |
|-----|--------------------------------------------------------------------------------------------------------------------------|----------------------------|-----------------------------------------------------------------|----|
|     | $C_{22}H_{32}N_2O_5$<br>Phomopsisin A                                                                                    |                            |                                                                 |    |
| 152 | 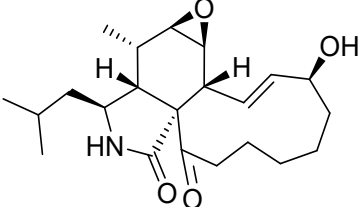<br>$C_{22}H_{33}NO_4$<br>Phomopsisin B | <i>Phomopsis</i> sp. sh917 | Displayed no cytotoxicity and anti-inflammatory                 | 54 |
| 153 | <br>$C_{22}H_{33}NO_4$<br>Phomopsisin C | <i>Phomopsis</i> sp. sh917 | Displayed no cytotoxicity and showed anti-inflammatory activity | 54 |
| 154 | <br>$C_{22}H_{33}NO_5$<br>Xylarisin    | <i>Phomopsis</i> sp. sh917 | Displayed no cytotoxicity and anti-inflammatory                 | 54 |
| 155 | <br>$C_{32}H_{41}NO_6$                | <i>Phomopsis</i> sp. shj2  | Antimigratory                                                   | 48 |

|     |                                                                                                                                                                                                                                                                                                  |                           |                                                     |    |
|-----|--------------------------------------------------------------------------------------------------------------------------------------------------------------------------------------------------------------------------------------------------------------------------------------------------|---------------------------|-----------------------------------------------------|----|
|     | 18-Acetoxycytochalasin H                                                                                                                                                                                                                                                                         |                           |                                                     |    |
| 156 | 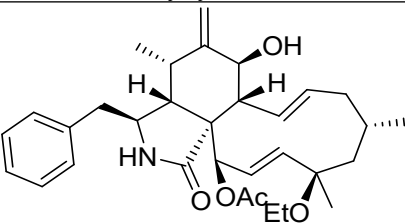 <p>Chemical structure of 18-Acetoxycytochalasin H, a complex polycyclic molecule with a benzylamino group, a hydroxyl group, and an acetoxy group at the 18-position.</p> <p><math>C_{32}H_{43}NO_5</math></p> | <i>Phomopsis</i> sp. shj2 | Antimigratory                                       | 48 |
| 157 |  <p>Chemical structure of 18-Ethoxycytochalasin H, similar to 18-Acetoxycytochalasin H but with an ethoxy group at the 18-position.</p> <p><math>C_{30}H_{39}NO_5</math></p>                                    | <i>Phomopsis</i> sp. shj2 | Antimigratory                                       | 48 |
| 158 |  <p>Chemical structure of 18-Acetoxycytochalasin J, similar to 18-Acetoxycytochalasin H but with a hydroxyl group at the 18-position.</p> <p><math>C_{30}H_{41}NO_4</math></p>                                 | <i>Phomopsis</i> sp. shj2 | Not determined for any relevant biological activity | 48 |
| 159 |  <p>Chemical structure of 18-Ethoxycytochalasin J, similar to 18-Ethoxycytochalasin H but with a hydroxyl group at the 18-position.</p> <p><math>C_{30}H_{37}NO_5</math></p>                                  | <i>Phomopsis</i> sp. shj2 | Not determined for any relevant biological activity | 48 |

|     | 7-Oxocytochalasin H                                                                                                                                                          |                           |                                                     |    |
|-----|------------------------------------------------------------------------------------------------------------------------------------------------------------------------------|---------------------------|-----------------------------------------------------|----|
| 160 | 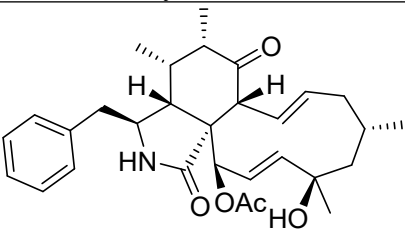 <p>C<sub>30</sub>H<sub>39</sub>NO<sub>5</sub><br/>Cytochalasin H<sub>3</sub></p>           | <i>Phomopsis</i> sp. shj2 | Not determined for any relevant biological activity | 48 |
| 161 |  <p>C<sub>32</sub>H<sub>42</sub>NO<sub>6</sub><br/>Cytochalasin H<sub>4</sub></p>           | <i>Phomopsis</i> sp. shj2 | Displayed no antimigratory activity                 | 48 |
| 162 |  <p>C<sub>30</sub>H<sub>37</sub>NO<sub>4</sub><br/>21-Acetoxyctochalasin J<sub>2</sub></p> | <i>Phomopsis</i> sp. shj2 | Antimigratory                                       | 48 |

|     |                                                                                                                                                                             |                         |                           |    |
|-----|-----------------------------------------------------------------------------------------------------------------------------------------------------------------------------|-------------------------|---------------------------|----|
| 163 | 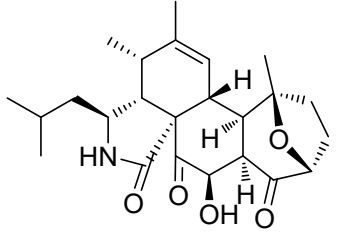 <p data-bbox="488 438 703 507"> <math>C_{24}H_{33}NO_5</math><br/> Spicochalasin A </p>   | <i>Spicaria elegans</i> | Cytotoxicity              | 26 |
| 164 |  <p data-bbox="488 801 703 874"> <math>C_{27}H_{39}NO_4</math><br/> Aspochalasin N </p>    | <i>Spicaria elegans</i> | Displayed no cytotoxicity | 26 |
| 165 |  <p data-bbox="488 1168 703 1236"> <math>C_{27}H_{39}NO_5</math><br/> Aspochalasin O </p> | <i>Spicaria elegans</i> | Displayed no cytotoxicity | 26 |

|     |                                                                                                                                                                           |                                               |                                                             |    |
|-----|---------------------------------------------------------------------------------------------------------------------------------------------------------------------------|-----------------------------------------------|-------------------------------------------------------------|----|
| 166 | 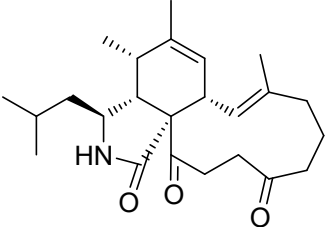 <p data-bbox="495 437 696 501"> <math>C_{24}H_{35}NO_3</math><br/> Aspochalasin Q </p>  | <i>Spicaria elegans</i>                       | Displayed no cytotoxicity                                   | 26 |
| 167 |  <p data-bbox="510 730 674 794"> <math>C_{28}H_{37}NO_3</math><br/> Brunnesin A </p>     | <i>Metarhizium brunneum</i><br>TBRC-BCC 79240 | Displayed no antibacterial, antifungal and cytotoxicity     | 55 |
| 168 |  <p data-bbox="510 1026 674 1090"> <math>C_{28}H_{35}NO_4</math><br/> Brunnesin B </p>  | <i>Metarhizium brunneum</i><br>TBRC-BCC 79240 | Displayed antibacterial, and no antifungal and cytotoxicity | 55 |
| 169 |  <p data-bbox="510 1321 674 1385"> <math>C_{28}H_{35}NO_3</math><br/> Brunnesin C </p> | <i>Metarhizium brunneum</i><br>TBRC-BCC 79240 | Displayed antibacterial, and no antifungal and cytotoxicity | 55 |

|     |                                                                                                                                                                           |                                                                                      |                                                                                                            |                                           |
|-----|---------------------------------------------------------------------------------------------------------------------------------------------------------------------------|--------------------------------------------------------------------------------------|------------------------------------------------------------------------------------------------------------|-------------------------------------------|
| 170 | 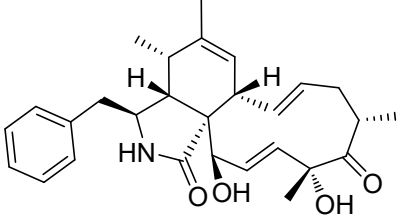 <p data-bbox="510 424 674 491"> <math>C_{28}H_{35}NO_4</math><br/> Brunnesin D </p>     | <p data-bbox="981 312 1285 379"><i>Metarhizium brunneum</i><br/>TBRC-BCC 79240</p>   | <p data-bbox="1368 296 1677 400">Displayed antibacterial,<br/>and cytotoxicity and no<br/>antifungal</p>   | <p data-bbox="1861 328 1883 344">55</p>   |
| 171 |  <p data-bbox="510 722 674 790"> <math>C_{28}H_{37}NO_4</math><br/> Brunnesin E </p>     | <p data-bbox="981 611 1285 678"><i>Metarhizium brunneum</i><br/>TBRC-BCC 79240</p>   | <p data-bbox="1368 595 1677 699">Displayed antibacterial,<br/>and no antifungal and<br/>cytotoxicity</p>   | <p data-bbox="1861 627 1883 643">55</p>   |
| 172 |  <p data-bbox="510 1021 674 1088"> <math>C_{28}H_{37}NO_4</math><br/> Brunnesin F </p>  | <p data-bbox="981 909 1285 976"><i>Metarhizium brunneum</i><br/>TBRC-BCC 79240</p>   | <p data-bbox="1368 885 1677 989">Displayed antibacterial,<br/>and cytotoxicity and no<br/>antifungal</p>   | <p data-bbox="1861 917 1883 933">55</p>   |
| 173 |  <p data-bbox="510 1319 674 1386"> <math>C_{28}H_{35}NO_4</math><br/> Brunnesin G </p> | <p data-bbox="981 1200 1285 1267"><i>Metarhizium brunneum</i><br/>TBRC-BCC 79240</p> | <p data-bbox="1368 1176 1677 1279">Displayed antibacterial,<br/>and cytotoxicity and no<br/>antifungal</p> | <p data-bbox="1861 1208 1883 1224">55</p> |

|     |                                                                                                                                                                           |                                                                                         |                                                                                                              |                                           |
|-----|---------------------------------------------------------------------------------------------------------------------------------------------------------------------------|-----------------------------------------------------------------------------------------|--------------------------------------------------------------------------------------------------------------|-------------------------------------------|
| 174 | 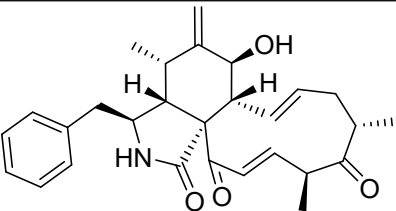 <p data-bbox="510 411 674 480"> <math>C_{28}H_{33}NO_4</math><br/> Brunnesin H </p>     | <p data-bbox="981 304 1285 373"> <i>Metarhizium brunneum</i><br/> TBRC-BCC 79240 </p>   | <p data-bbox="1368 288 1677 389"> Not determined for any<br/> relevant biological<br/> activity </p>         | <p data-bbox="1854 320 1883 341">55</p>   |
| 175 |  <p data-bbox="510 715 674 783"> <math>C_{28}H_{37}NO_6</math><br/> Brunnesin I </p>     | <p data-bbox="981 596 1285 665"> <i>Metarhizium brunneum</i><br/> TBRC-BCC 79240 </p>   | <p data-bbox="1368 580 1677 681"> Displayed cytotoxicity<br/> and no antibacterial, and<br/> antifungal </p> | <p data-bbox="1854 612 1883 633">55</p>   |
| 176 |  <p data-bbox="510 1018 674 1086"> <math>C_{28}H_{37}NO_6</math><br/> Brunnesin J </p>  | <p data-bbox="981 900 1285 968"> <i>Metarhizium brunneum</i><br/> TBRC-BCC 79240 </p>   | <p data-bbox="1368 884 1677 984"> Displayed no<br/> antibacterial, antifungal<br/> and cytotoxicity </p>     | <p data-bbox="1854 916 1883 936">55</p>   |
| 177 |  <p data-bbox="510 1321 674 1390"> <math>C_{28}H_{37}NO_5</math><br/> Brunnesin K </p> | <p data-bbox="981 1203 1285 1272"> <i>Metarhizium brunneum</i><br/> TBRC-BCC 79240 </p> | <p data-bbox="1368 1187 1677 1287"> Displayed no<br/> antibacterial, antifungal<br/> and cytotoxicity </p>   | <p data-bbox="1854 1219 1883 1240">55</p> |



|     |                                                                                                                                                                                                        |                                                                                                                                                                   |                                                                                                              |                                              |
|-----|--------------------------------------------------------------------------------------------------------------------------------------------------------------------------------------------------------|-------------------------------------------------------------------------------------------------------------------------------------------------------------------|--------------------------------------------------------------------------------------------------------------|----------------------------------------------|
| 178 | 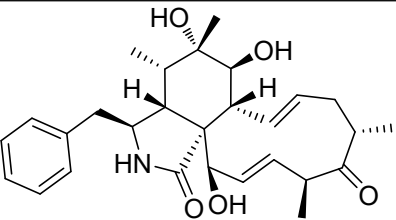 <p data-bbox="510 422 674 491"> <math>C_{28}H_{37}NO_5</math><br/> Brunnesin L </p>                                  | <p data-bbox="981 308 1285 376"> <i>Metarhizium brunneum</i><br/> TBRC-BCC 79240 </p>                                                                             | <p data-bbox="1368 292 1682 400"> Displayed cytotoxicity<br/> and no antibacterial, and<br/> antifungal </p> | <p data-bbox="1861 328 1883 344">55</p>      |
| 179 |  <p data-bbox="510 721 674 790"> <math>C_{28}H_{37}NO_6</math><br/> Brunnesin M </p>                                  | <p data-bbox="981 606 1285 675"> <i>Metarhizium brunneum</i><br/> TBRC-BCC 79240 </p>                                                                             | <p data-bbox="1368 590 1682 699"> Displayed cytotoxicity<br/> and no antibacterial, and<br/> antifungal </p> | <p data-bbox="1861 630 1883 646">55</p>      |
| 180 |  <p data-bbox="510 1019 674 1088"> <math>C_{28}H_{37}NO_5</math><br/> Brunnesin N </p>                               | <p data-bbox="981 904 1285 973"> <i>Metarhizium brunneum</i><br/> TBRC-BCC 79240 </p>                                                                             | <p data-bbox="1368 888 1682 997"> Displayed cytotoxicity<br/> and no antibacterial, and<br/> antifungal </p> | <p data-bbox="1861 928 1883 944">55</p>      |
| 181 |  <p data-bbox="315 1318 869 1383"> <math>C_{28}H_{35}NO_5</math><br/> 6,7-Dihydro-7-oxo-deacetylcytochalasin C </p> | <p data-bbox="954 1169 1317 1305"> <i>Metarhizium brunneum</i><br/> TBRC-BCC 79240, <i>Xylaria</i><br/> <i>longipes</i>, <i>Xylaria arbuscula</i><br/> GZS74 </p> | <p data-bbox="1368 1185 1675 1294"> Displayed antibacterial,<br/> cytotoxicity and no<br/> antifungal </p>   | <p data-bbox="1850 1225 1899 1241">55,56</p> |

|     |                                                                                                                                                                                                    |                                                                                                                                                     |                                                                                                              |                                              |
|-----|----------------------------------------------------------------------------------------------------------------------------------------------------------------------------------------------------|-----------------------------------------------------------------------------------------------------------------------------------------------------|--------------------------------------------------------------------------------------------------------------|----------------------------------------------|
| 182 | 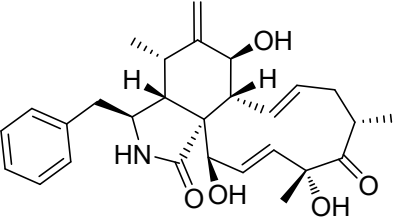 <p data-bbox="504 422 683 486"> <math>C_{28}H_{35}NO_5</math><br/> Zygosporin D </p>                             | <p data-bbox="952 271 1310 414"> <i>Metarhizium brunneum</i><br/> TBRC-BCC 79240, <i>Xylaria longipes</i>, <i>Xylaria arbuscula</i><br/> GZS74 </p> | <p data-bbox="1366 287 1680 399"> Displayed antibacterial,<br/> cytotoxicity and no<br/> antifungal </p>     | <p data-bbox="1848 327 1904 351">55,56</p>   |
| 183 |  <p data-bbox="504 721 683 785"> <math>C_{28}H_{35}NO_4</math><br/> Deacetylcytochalasin C </p>                   | <p data-bbox="952 582 1310 694"> <i>Metarhizium brunneum</i><br/> TBRC-BCC 79240, <i>Xylaria arbuscula</i><br/> GZS74 </p>                          | <p data-bbox="1366 582 1680 694"> Displayed antibacterial,<br/> cytotoxicity and no<br/> antifungal </p>     | <p data-bbox="1848 622 1904 646">55,57</p>   |
| 184 |  <p data-bbox="336 1019 851 1083"> <math>C_{28}H_{35}NO_5</math><br/> 18-Deshydroxyl-deacetylcytochalasin C </p> | <p data-bbox="974 901 1288 973"> <i>Metarhizium brunneum</i><br/> TBRC-BCC 79240 </p>                                                               | <p data-bbox="1366 885 1680 997"> Displayed antibacterial,<br/> and no antifungal and<br/> cytotoxicity </p> | <p data-bbox="1859 917 1892 941">55</p>      |
| 185 |  <p data-bbox="515 1318 672 1361"> <math>C_{24}H_{35}NO_5</math> </p>                                           | <p data-bbox="996 1204 1265 1244"> <i>Trichoderma gamsii</i> </p>                                                                                   | <p data-bbox="1433 1189 1612 1268"> Displayed no<br/> cytotoxicity </p>                                      | <p data-bbox="1848 1204 1904 1228">24,58</p> |

|     |                                                                                                                                                                                                                         |                           |                              |       |
|-----|-------------------------------------------------------------------------------------------------------------------------------------------------------------------------------------------------------------------------|---------------------------|------------------------------|-------|
| 186 | <p style="text-align: center;">Aspochalasin I</p> 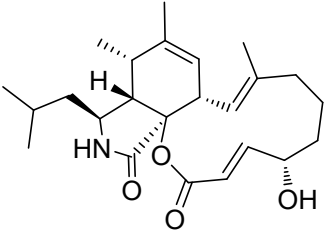 <p style="text-align: center;"><math>C_{24}H_{35}NO_4</math><br/>Aspochalasin J</p> | <i>Trichoderma gamsii</i> | Cytotoxic                    | 24,58 |
| 187 |  <p style="text-align: center;"><math>C_{23}H_{33}NO_4</math><br/>Trichalasin A</p>                                                    | <i>Trichoderma gamsii</i> | Displayed no<br>cytotoxicity | 58    |
| 188 |  <p style="text-align: center;"><math>C_{24}H_{35}NO_4</math><br/>Trichalasin B</p>                                                   | <i>Trichoderma gamsii</i> | Displayed no<br>cytotoxicity | 58    |

|     |                                                                                                                                                                             |                           |                           |       |
|-----|-----------------------------------------------------------------------------------------------------------------------------------------------------------------------------|---------------------------|---------------------------|-------|
| 189 | 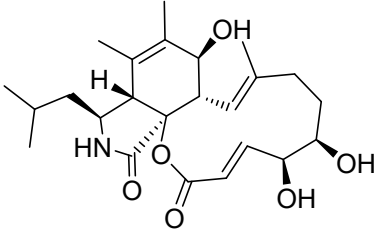 <p data-bbox="504 438 683 502"> <math>C_{24}H_{35}NO_6</math><br/> Trichalasin C </p>     | <i>Trichoderma gamsii</i> | Displayed no cytotoxicity | 23,34 |
| 190 |  <p data-bbox="504 753 683 817"> <math>C_{24}H_{35}NO_5</math><br/> Trichalasin D </p>     | <i>Trichoderma gamsii</i> | Displayed no cytotoxicity | 23    |
| 191 |  <p data-bbox="492 1053 689 1117"> <math>C_{24}H_{33}NO_3</math><br/> Trichoderone A </p> | <i>Trichoderma gamsii</i> | Displayed no cytotoxicity | 24    |
| 192 |                                                                                          | <i>Trichoderma gamsii</i> | Displayed no cytotoxicity | 24    |

|     |                                                                                                                           |                           |                           |    |
|-----|---------------------------------------------------------------------------------------------------------------------------|---------------------------|---------------------------|----|
|     | $C_{24}H_{35}NO_5$<br>Trichoderone B                                                                                      |                           |                           |    |
| 193 | 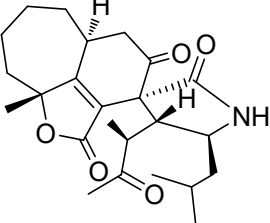<br>$C_{24}H_{33}NO_5$<br>Trichodermone  | <i>Trichoderma gamsii</i> | Displayed no cytotoxicity | 25 |
| 194 | <br>$C_{24}H_{35}NO_7$<br>Trichalasin E  | <i>Trichoderma gamsii</i> | Displayed no cytotoxicity | 34 |
| 195 | <br>$C_{24}H_{37}NO_5$<br>Trichalasin F | <i>Trichoderma gamsii</i> | Displayed no cytotoxicity | 34 |

|     |                                                                                                                                              |                           |                           |    |
|-----|----------------------------------------------------------------------------------------------------------------------------------------------|---------------------------|---------------------------|----|
| 196 | 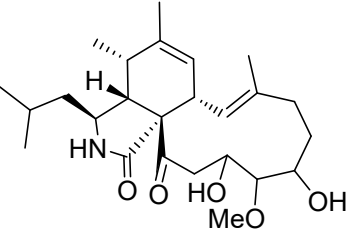 <p> <math>C_{25}H_{39}NO_5</math><br/> Aspochalasin K </p> | <i>Trichoderma gamsii</i> | Displayed no cytotoxicity | 34 |
| 197 |  <p> <math>C_{25}H_{39}NO_5</math><br/> Trichalasin G </p>  | <i>Trichoderma gamsii</i> | Cytotoxicity              | 34 |
| 198 |  <p> <math>C_{24}H_{35}NO_4</math><br/> Trichalasin H </p> | <i>Trichoderma gamsii</i> | Displayed no cytotoxicity | 34 |

|     |                                                                                                                                                                 |                                                                                                                                                       |                                                                      |                   |
|-----|-----------------------------------------------------------------------------------------------------------------------------------------------------------------|-------------------------------------------------------------------------------------------------------------------------------------------------------|----------------------------------------------------------------------|-------------------|
| 199 | 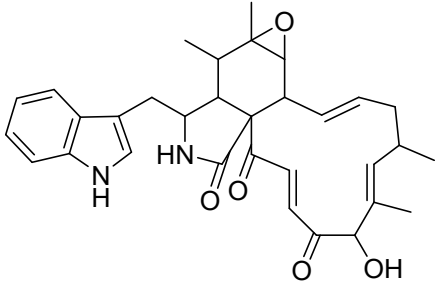 <p><math>C_{32}H_{36}N_2O_5</math><br/>Chaetoglobosin A</p>                   | <p><i>Calonectria morganii</i>,<br/><i>Chaetomium globosum</i> TW1-1,<br/><i>Chaetomium globosum</i> C2F17,<br/><i>Chaetomium globosum</i> YE3048</p> | <p>Antibacterial, antifungal,<br/>nematicidal, and antimicrobial</p> | <p>9,38,59–62</p> |
| 200 |  <p><math>C_{34}H_{38}N_2O_6</math><br/>19-<i>O</i>-acetylchaetoglobosin A</p> | <p><i>Calonectria morganii</i></p>                                                                                                                    | <p>Not determined for any relevant biological activity</p>           | <p>59</p>         |
| 201 |  <p><math>C_{22}H_{31}NO_5</math><br/>Alachalasin A</p>                       | <p><i>Stachybotrys charatum</i></p>                                                                                                                   | <p>Displayed no antimicrobial effect</p>                             | <p>63</p>         |

|     |                                                                                                                                                                                                                                                                                                                                                                                                                       |                              |                                   |    |
|-----|-----------------------------------------------------------------------------------------------------------------------------------------------------------------------------------------------------------------------------------------------------------------------------------------------------------------------------------------------------------------------------------------------------------------------|------------------------------|-----------------------------------|----|
| 202 | 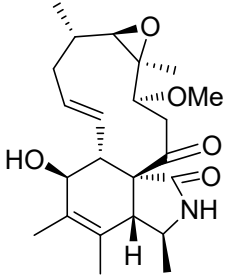 <p>Chemical structure of Alachalasin B, a complex polycyclic molecule with a decalin core, a piperidine ring, and a decalin-like ring system. It features a hydroxyl group, a methyl group, and a methoxy group. The molecular formula is <math>C_{23}H_{33}NO_5</math>.</p> <p><math>C_{23}H_{33}NO_5</math><br/>Alachalasin B</p> | <i>Stachybotrys charatum</i> | Displayed no antimicrobial effect | 63 |
| 203 |  <p>Chemical structure of Alachalasin C, similar to Alachalasin B but with a different side chain. The molecular formula is <math>C_{22}H_{31}NO_4</math>.</p> <p><math>C_{22}H_{31}NO_4</math><br/>Alachalasin C</p>                                                                                                                | <i>Stachybotrys charatum</i> | Displayed no antimicrobial effect | 63 |
| 204 |  <p>Chemical structure of Alachalasin D, similar to Alachalasin B but with a different side chain. The molecular formula is <math>C_{22}H_{31}NO_5</math>.</p> <p><math>C_{22}H_{31}NO_5</math><br/>Alachalasin D</p>                                                                                                               | <i>Stachybotrys charatum</i> | Antibacterial                     | 63 |



|     |                                                                                                                                                                                                                                                                                                                                                                                                                    |                              |                                   |    |
|-----|--------------------------------------------------------------------------------------------------------------------------------------------------------------------------------------------------------------------------------------------------------------------------------------------------------------------------------------------------------------------------------------------------------------------|------------------------------|-----------------------------------|----|
| 205 | 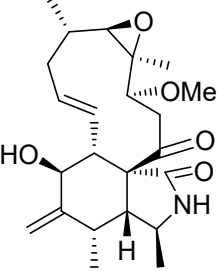 <p>Chemical structure of Alachalasin E, a complex polycyclic molecule with a decalin core, a methyl group, a hydroxyl group, a methyl group, a hydrogen atom, an NH group, a carbonyl group, a methoxy group, and a long chain with a double bond and an oxygen atom.</p> <p><math>C_{23}H_{33}NO_5</math><br/>Alachalasin E</p> | <i>Stachybotrys charatum</i> | Displayed no antimicrobial effect | 63 |
| 206 |  <p>Chemical structure of Alachalasin F, similar to Alachalasin E but with an additional amino group and a different ring fusion.</p> <p><math>C_{27}H_{34}N_6O_4</math><br/>Alachalasin F</p>                                                                                                                                    | <i>Stachybotrys charatum</i> | Displayed no antimicrobial effect | 63 |
| 207 |  <p>Chemical structure of Alachalasin G, similar to Alachalasin F but with an additional oxygen atom in the ring system.</p> <p><math>C_{27}H_{38}N_2O_6</math><br/>Alachalasin G</p>                                                                                                                                            | <i>Stachybotrys charatum</i> | Antibacterial                     | 63 |

|     |                                                                                                                                                                                                 |                                                                                                                                                                                                                                                                                                                                                                                                              |                                                                                                                                                     |                                                            |
|-----|-------------------------------------------------------------------------------------------------------------------------------------------------------------------------------------------------|--------------------------------------------------------------------------------------------------------------------------------------------------------------------------------------------------------------------------------------------------------------------------------------------------------------------------------------------------------------------------------------------------------------|-----------------------------------------------------------------------------------------------------------------------------------------------------|------------------------------------------------------------|
| 208 | 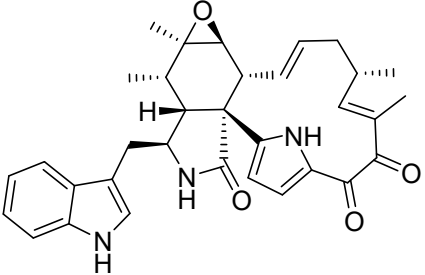 <p style="text-align: center;"> <math>C_{33}H_{35}N_3O_4</math><br/>           Penochalasin A         </p>    | <p style="text-align: center;"><i>Chaetomium globosum</i> IFB-E019, <i>Chaetomium globosum</i> TW1-1</p>                                                                                                                                                                                                                                                                                                     | <p style="text-align: center;">Cytotoxicity, antiviral</p>                                                                                          | <p style="text-align: center;">64,65</p>                   |
| 209 |  <p style="text-align: center;"> <math>C_{32}H_{36}N_2O_5</math><br/>           Chaetoglobosin C         </p>  | <p style="text-align: center;"><i>Chaetomium globosum</i> IFB-E019, <i>Chaetomium elatum</i> ChE01, <i>Chaetomium globosum</i>, <i>Chaetomium globosum</i> SNSHI-5, <i>Chaetomium globosum</i> TW1-1, <i>Chaetomium globosum</i> YE3048, <i>Chaetomium globosum</i> kz-19</p>                                                                                                                                | <p style="text-align: center;">Displayed cytotoxicity, phytotoxicity, antibacterial, antifungal, and no anti-tuberculosis activity</p>              | <p style="text-align: center;">39,61,62,64,66–70</p>       |
| 210 |  <p style="text-align: center;"> <math>C_{32}H_{38}N_2O_5</math><br/>           Chaetoglobosin E         </p> | <p style="text-align: center;"><i>Chaetomium globosum</i> IFB-E019, <i>Chaetomium globosum</i>, <i>Chaetomium globosum</i> MCCC 3A00607, <i>Chaetomium globosum</i> SNSHI-5, <i>Chaetomium globosum</i> C2F17, <i>Chaetomium globosum</i> TY1, <i>Chaetomium globosum</i> D38, <i>Chaetomium globosum</i> YE3048, <i>Chaetomium globosum</i> YE3048, <i>Chaetomium globosum</i> kz-19, <i>Chaetomium</i></p> | <p style="text-align: center;">Displayed cytotoxicity, phytotoxicity, antibacterial, antifungal, no anti-tuberculosis, and no anti-inflammatory</p> | <p style="text-align: center;">38,39,62,64,67–69,71–75</p> |

|     |                                                                                                                                               |                                                                                                                                                                                                                                                   |                                                          |                   |
|-----|-----------------------------------------------------------------------------------------------------------------------------------------------|---------------------------------------------------------------------------------------------------------------------------------------------------------------------------------------------------------------------------------------------------|----------------------------------------------------------|-------------------|
|     |                                                                                                                                               | <i>madrasense</i> 375, <i>Chaetomium tectifimeti</i> S104                                                                                                                                                                                         |                                                          |                   |
| 211 | 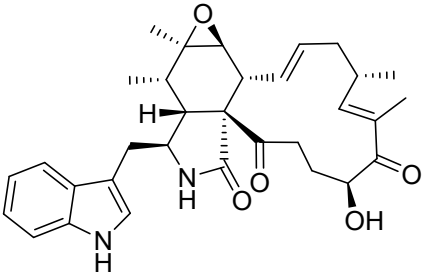 <p><math>C_{32}H_{38}N_2O_5</math><br/>Chaetoglobosin F</p> | <i>Chaetomium globosum</i> IFB-E019, <i>Chaetomium elatum</i> ChE01, <i>Chaetomium globosum</i> , <i>Chaetomium globosum</i> MCCC 3A00607, <i>Chaetomium globosum</i> TW1-1, <i>Chaetomium globosum</i> SNSHI-5, <i>Chaetomium globosum</i> C2F17 | Displayed cytotoxicity and no anti-tuberculosis activity | 38,64,66–69,71,76 |
| 212 |  <p><math>C_{32}H_{36}N_2O_5</math><br/>Chaetoglobosin U</p> | <i>Chaetomium globosum</i> IFB-E019, <i>Chaetomium globosum</i> TW1-1, <i>Chaetomium globosum</i> YE3048                                                                                                                                          | Cytotoxicity, antibacterial, antifungal,                 | 60,62,64,69,76    |
| 213 |  <p><math>C_{32}H_{36}N_2O_5</math><br/>Cytoglobosin A</p>  | <i>Chaetomium globosum</i> QEN-14, <i>Chaetomium globosum</i> TW1-1, <i>Chaetomium globosum</i> SNSHI-5, <i>Chaetomium madrasense</i> 375                                                                                                         | Displayed no cytotoxicity                                | 68,69,74,76–78    |

|     |                                                                                                                                                                                               |                                                                                                                                                                                                                                                      |                                                                                                                |                                                      |
|-----|-----------------------------------------------------------------------------------------------------------------------------------------------------------------------------------------------|------------------------------------------------------------------------------------------------------------------------------------------------------------------------------------------------------------------------------------------------------|----------------------------------------------------------------------------------------------------------------|------------------------------------------------------|
| 214 | 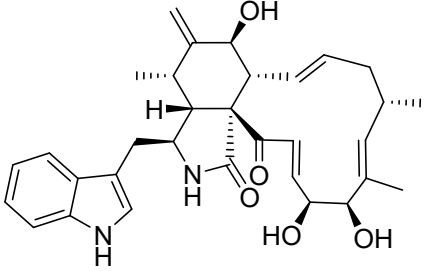 <p style="text-align: center;"> <math>C_{32}H_{38}N_2O_5</math><br/>           Cytoglobosin B         </p>  | <p style="text-align: center;"> <i>Chaetomium globosum</i> QEN-14,<br/> <i>Chaetomium globosum</i> MCCC 3A00607,<br/> <i>Chaetomium globosum</i> SNSHI-5         </p>                                                                                | <p style="text-align: center;">Cytotoxicity</p>                                                                | <p style="text-align: center;">68,69,71,77</p>       |
| 215 |  <p style="text-align: center;"> <math>C_{32}H_{38}N_2O_5</math><br/>           Cytoglobosin C         </p>  | <p style="text-align: center;"> <i>Chaetomium globosum</i> QEN-14,<br/> <i>Chaetomium globosum</i> TW1-1,<br/> <i>Chaetomium globosum</i> MCCC 3A00607,<br/> <i>Chaetomium globosum</i> SNSHI-5,<br/> <i>Chaetomium globosum</i> YE3048         </p> | <p style="text-align: center;">           Cytotoxicity,<br/>           antibacterial, antifungal,         </p> | <p style="text-align: center;">62,68,69,71,77,79</p> |
| 216 |  <p style="text-align: center;"> <math>C_{32}H_{38}N_2O_4</math><br/>           Cytoglobosin D         </p> | <p style="text-align: center;"> <i>Chaetomium globosum</i> QEN-14         </p>                                                                                                                                                                       | <p style="text-align: center;">Cytotoxicity</p>                                                                | <p style="text-align: center;">77</p>                |

|     |                                                                                                                                                                               |                                                                                                                |                                                                                            |                                            |
|-----|-------------------------------------------------------------------------------------------------------------------------------------------------------------------------------|----------------------------------------------------------------------------------------------------------------|--------------------------------------------------------------------------------------------|--------------------------------------------|
| 217 | 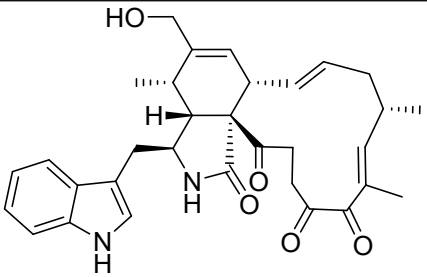 <p data-bbox="488 475 696 539"> <math>C_{32}H_{36}N_2O_5</math><br/> Cytoglobosin E </p>    | <p data-bbox="943 316 1323 416"> <i>Chaetomium globosum</i> QEN-14,<br/> <i>Chaetomium globosum</i> TW1-1 </p> | <p data-bbox="1435 336 1610 400"> Displayed no cytotoxicity </p>                           | <p data-bbox="1850 352 1899 368">77,79</p> |
| 218 |  <p data-bbox="488 821 696 885"> <math>C_{32}H_{38}N_2O_5</math><br/> Cytoglobosin F </p>    | <p data-bbox="943 683 1323 751"> <i>Chaetomium globosum</i> QEN-14 </p>                                        | <p data-bbox="1368 667 1677 767"> Not determined for any relevant biological activity </p> | <p data-bbox="1861 703 1883 719">77</p>    |
| 219 |  <p data-bbox="488 1173 696 1236"> <math>C_{32}H_{40}N_2O_5</math><br/> Cytoglobosin G </p> | <p data-bbox="943 1034 1323 1102"> <i>Chaetomium globosum</i> QEN-14 </p>                                      | <p data-bbox="1435 1034 1610 1098"> Displayed no cytotoxicity </p>                         | <p data-bbox="1861 1054 1883 1070">77</p>  |

|     |                                                                                                                                                                                                     |                                                                                                                                                                                                                                                                                                 |                                                                                                                     |                                   |
|-----|-----------------------------------------------------------------------------------------------------------------------------------------------------------------------------------------------------|-------------------------------------------------------------------------------------------------------------------------------------------------------------------------------------------------------------------------------------------------------------------------------------------------|---------------------------------------------------------------------------------------------------------------------|-----------------------------------|
| 220 | 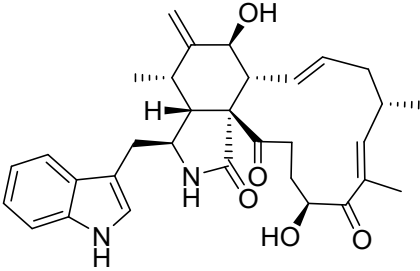 <p style="text-align: center;"> <math>C_{32}H_{38}N_2O_5</math><br/>           Chaetoglobosin F<sub>ex</sub> </p> | <p><i>Chaetomium globosum</i> QEN-14, <i>Chaetomium globosum</i>, <i>Chaetomium globosum</i> MCCC 3A00607, <i>Chaetomium globosum</i> SNSHI-5, <i>Chaetomium globosum</i> C2F17, <i>Chaetomium globosum</i> D38, <i>Chaetomium globosum</i> kz-19, <i>Chaetomium tectifimeti</i> S104</p>       | <p>Displayed anti-inflammatory, phytotoxicity, cytotoxicity and no anti-tuberculosis activity, no antibacterial</p> | <p>38,39,67–69,71,73,75,77,80</p> |
| 221 |  <p style="text-align: center;"> <math>C_{32}H_{36}N_2O_5</math><br/>           Isochaetoglobosin D         </p>   | <p><i>Chaetomium globosum</i> QEN-14, <i>Chaetomium elatum</i> ChE01, <i>Chaetomium globosum</i> MCCC 3A00607, <i>Chaetomium globosum</i> SNSHI-5, <i>Chaetomium madrasense</i> 375, <i>Chaetomium globosum</i> C2F17, <i>Chaetomium globosum</i> kz-19, <i>Chaetomium tectifimeti</i> S104</p> | <p>Displayed cytotoxicity and no anti-tuberculosis activity, no antibacterial, no anti-inflammatory</p>             | <p>38,39,66,68,69,71,75,77,78</p> |
| 222 |  <p style="text-align: center;"> <math>C_{32}H_{36}N_2O_5</math><br/>           Chaetoglobosin B         </p>     | <p><i>Chaetomium elatum</i> ChE01, <i>Chaetomium globosum</i> MCCC 3A00607, <i>Chaetomium globosum</i> C2F17, TY1, <i>Chaetomium madrasense</i> 375, <i>Chaetomium tectifimeti</i> S104</p>                                                                                                     | <p>Displayed cytotoxicity and no anti-tuberculosis activity, no antibacterial, no anti-inflammatory</p>             | <p>38,66,71,72,74,75</p>          |

|     |                                                                                                                                                                                                 |                                                                                                                                                                                                                                                                                                                                                  |                                                                                                                                                                                                                                             |                                                            |
|-----|-------------------------------------------------------------------------------------------------------------------------------------------------------------------------------------------------|--------------------------------------------------------------------------------------------------------------------------------------------------------------------------------------------------------------------------------------------------------------------------------------------------------------------------------------------------|---------------------------------------------------------------------------------------------------------------------------------------------------------------------------------------------------------------------------------------------|------------------------------------------------------------|
| 223 | 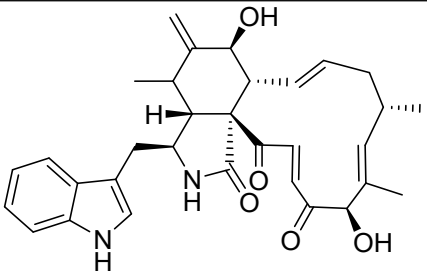 <p style="text-align: center;"> <math>C_{32}H_{36}N_2O_5</math><br/>           Chaetoglobosin D         </p>  | <p style="text-align: center;"> <i>Chaetomium elatum</i> ChE01,<br/> <i>Chaetomium globosum</i><br/>           C2F17, <i>Chaetomium</i><br/> <i>globosum</i> kz-19, <i>Chaetomium</i><br/> <i>madrasense</i> 375, <i>Chaetomium</i><br/> <i>tectifimeti</i> S104         </p>                                                                    | <p style="text-align: center;">           Displayed cytotoxicity<br/>           and no anti-tuberculosis<br/>           activity, no antibacterial,<br/>           no anti-inflammatory         </p>                                        | <p style="text-align: center;">38,39,66,74,75</p>          |
| 224 |  <p style="text-align: center;"> <math>C_{32}H_{34}N_2O_5</math><br/>           Chaetoglobosin G         </p>  | <p style="text-align: center;"> <i>Chaetomium elatum</i> ChE01,<br/> <i>Chaetomium globosum</i>,<br/> <i>Chaetomium globosum</i><br/>           SNSHI-5, <i>Chaetomium</i><br/> <i>madrasense</i> 375, <i>Chaetomium</i><br/> <i>globosum</i> C2F17,<br/> <i>Chaetomium globosum</i> kz-19,<br/> <i>Chaetomium tectifimeti</i> S104         </p> | <p style="text-align: center;">           Displayed cytotoxicity,<br/>           antibacterial, antifungal,<br/>           cytotoxicity and no anti-<br/>           tuberculosis activity, no<br/>           anti-inflammatory         </p> | <p style="text-align: center;">38,39,66,68,69,75,78,81</p> |
| 225 |  <p style="text-align: center;"> <math>C_{32}H_{38}N_2O_3</math><br/>           Chaetoglobosin V         </p> | <p style="text-align: center;"> <i>Chaetomium elatum</i> ChE01,<br/> <i>Chaetomium globosum</i> TW1-<br/>           1, <i>Chaetomium globosum</i> kz-<br/>           19         </p>                                                                                                                                                             | <p style="text-align: center;">           Displayed cytotoxicity<br/>           and no antibacterial         </p>                                                                                                                           | <p style="text-align: center;">39,66,82</p>                |

|     |                                                                                                                                                                                                                                                                                                                                                                                                                      |                                |                           |    |
|-----|----------------------------------------------------------------------------------------------------------------------------------------------------------------------------------------------------------------------------------------------------------------------------------------------------------------------------------------------------------------------------------------------------------------------|--------------------------------|---------------------------|----|
| 226 | 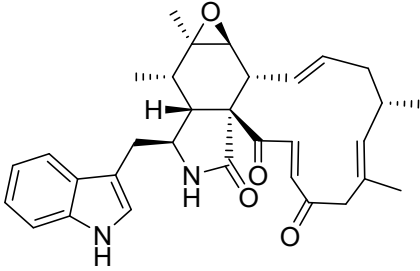 <p>Chemical structure of Prochaetoglobosin III, a complex polycyclic molecule with a central bicyclic core, a phenyl ring, and a long side chain with multiple methyl groups and a terminal double bond. Stereochemistry is indicated with wedges and dashes.</p> <p><math>C_{32}H_{36}N_2O_4</math><br/>Prochaetoglobosin III</p> | <i>Chaetomium elatum</i> ChE01 | Cytotoxicity              | 66 |
| 227 |  <p>Chemical structure of Prochaetoglobosin III<sub>ed</sub>, which is identical to Prochaetoglobosin III but includes an additional hydroxyl group (OH) on the side chain.</p> <p><math>C_{32}H_{36}N_2O_4</math><br/>Prochaetoglobosin III<sub>ed</sub></p>                                                                       | <i>Chaetomium elatum</i> ChE01 | Cytotoxicity              | 66 |
| 228 |  <p>Chemical structure of Chaetoconvosin A, a complex polycyclic molecule with a central bicyclic core, a phenyl ring, and a long side chain with multiple methyl groups and a terminal double bond. Stereochemistry is indicated with wedges and dashes.</p> <p><math>C_{29}H_{35}NO_5</math><br/>Chaetoconvosin A</p>            | <i>Chaetomium convolutum</i>   | Displayed no cytotoxicity | 83 |



|     |                                                                                                                                                                                       |                                                                                                                                                                                                                                                                                                                              |                                                                                                          |                         |
|-----|---------------------------------------------------------------------------------------------------------------------------------------------------------------------------------------|------------------------------------------------------------------------------------------------------------------------------------------------------------------------------------------------------------------------------------------------------------------------------------------------------------------------------|----------------------------------------------------------------------------------------------------------|-------------------------|
| 229 | 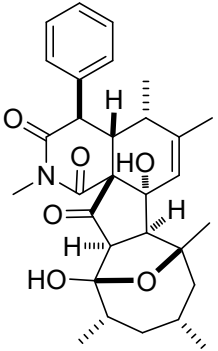 <p style="text-align: center;"><math>C_{30}H_{37}NO_6</math><br/>Chaetoconvosin B</p>               | <i>Chaetomium convolutum</i>                                                                                                                                                                                                                                                                                                 | Cytotoxicity,<br>phytotoxicity                                                                           | 83                      |
| 230 |  <p style="text-align: center;"><math>C_{32}H_{36}N_2O_5</math><br/>Chaetoglobosin V<sub>b</sub></p> | <i>Chaetomium globosum</i> ,<br><i>Chaetomium globosum</i><br>SNSHI-5, <i>Chaetomium</i><br><i>globosum</i> TW1-1,<br><i>Chaetomium madrasense</i> 375,<br><i>Chaetomium globosum</i><br>C2F17, <i>Chaetomium</i><br><i>globosum</i> D38, <i>Chaetomium</i><br><i>globosum</i> YE3048,<br><i>Chaetomium tectifimeti</i> S104 | Displayed antibacterial<br>antifungal, cytotoxicity<br>and no anti-tuberculosis,<br>no anti-inflammatory | 38,62,68–70,73,75,78,81 |
| 231 |  <p style="text-align: center;"><math>C_{32}H_{38}N_2O_5</math><br/>20-Dihydrochaetoglobosin A</p> | <i>Chaetomium globosum</i> ,<br><i>Chaetomium globosum</i> TW1-1                                                                                                                                                                                                                                                             | Cytotoxicity                                                                                             | 67,76                   |

|     |                                                                                                                                                                                                                                                                                                                                                                                                                                              |                                  |                                                     |    |
|-----|----------------------------------------------------------------------------------------------------------------------------------------------------------------------------------------------------------------------------------------------------------------------------------------------------------------------------------------------------------------------------------------------------------------------------------------------|----------------------------------|-----------------------------------------------------|----|
| 232 | 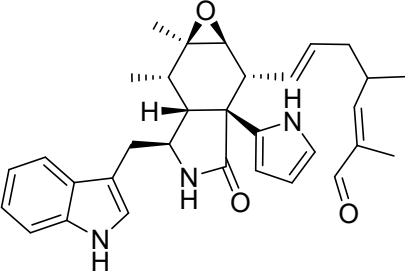 <p>Chemical structure of Armochaetoglobin A, a complex polycyclic molecule featuring a central bicyclic core with a lactam ring, a benzimidazole-like ring system, and a side chain with a terminal methyl group and a double bond. Stereochemistry is indicated with wedges and dashes.</p> <p><math>C_{32}H_{37}N_3O_3</math><br/>Armochaetoglobin A</p> | <i>Chaetomium globosum</i> TW1-1 | Not determined for any relevant biological activity | 79 |
| 233 |  <p>Chemical structure of Armochaetoglobin B, similar to A but with a hydroxyl group on the side chain. Stereochemistry is indicated with wedges and dashes.</p> <p><math>C_{32}H_{42}N_2O_5</math><br/>Armochaetoglobin B</p>                                                                                                                              | <i>Chaetomium globosum</i> TW1-1 | Cytotoxicity                                        | 79 |
| 234 |  <p>Chemical structure of Armochaetoglobin C, similar to B but with a different side chain. Stereochemistry is indicated with wedges and dashes.</p> <p><math>C_{32}H_{40}N_2O_5</math><br/>Armochaetoglobin C</p>                                                                                                                                         | <i>Chaetomium globosum</i> TW1-1 | Cytotoxicity                                        | 79 |

|     |                                                                                                                                                                                                                                                                                                                                                                                      |                                  |                           |    |
|-----|--------------------------------------------------------------------------------------------------------------------------------------------------------------------------------------------------------------------------------------------------------------------------------------------------------------------------------------------------------------------------------------|----------------------------------|---------------------------|----|
| 235 | 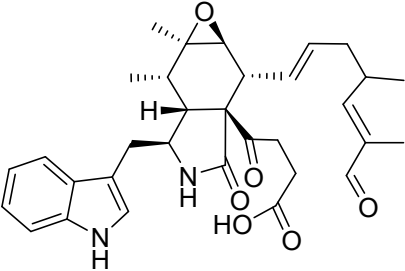 <p>Chemical structure of Armochaetoglobin D, a complex polycyclic molecule featuring a central ring system with a hydroxyl group, a methyl group, and a side chain containing a tryptophan residue and a long unsaturated chain.</p> <p><math>C_{32}H_{38}N_2O_6</math><br/>Armochaetoglobin D</p> | <i>Chaetomium globosum</i> TW1-1 | Cytotoxicity              | 79 |
| 236 |  <p>Chemical structure of Armochaetoglobin E, similar to D but with a methoxy group (MeO) instead of a hydroxyl group at the corresponding position.</p> <p><math>C_{33}H_{40}N_2O_6</math><br/>Armochaetoglobin E</p>                                                                              | <i>Chaetomium globosum</i> TW1-1 | Cytotoxicity              | 79 |
| 237 |  <p>Chemical structure of Armochaetoglobin F, featuring a hydroxyl group (HO) and a different side chain configuration compared to D and E.</p> <p><math>C_{32}H_{38}N_2O_4</math><br/>Armochaetoglobin F</p>                                                                                      | <i>Chaetomium globosum</i> TW1-1 | Displayed no cytotoxicity | 79 |

|     |                                                                                                                                                                                                                                                                                                                                                                                                                                             |                                                                            |                                                                 |              |
|-----|---------------------------------------------------------------------------------------------------------------------------------------------------------------------------------------------------------------------------------------------------------------------------------------------------------------------------------------------------------------------------------------------------------------------------------------------|----------------------------------------------------------------------------|-----------------------------------------------------------------|--------------|
| 238 | 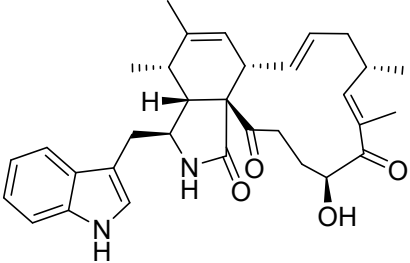 <p>Chemical structure of Armochaetoglobin G, a complex polycyclic molecule featuring a central bicyclic core with a fused indole ring system, a decalin-like ring, and a long side chain with multiple hydroxyl and methyl groups. Stereochemistry is indicated with wedges and dashes.</p> <p><math>C_{32}H_{38}N_2O_4</math><br/>Armochaetoglobin G</p> | <p><i>Chaetomium globosum</i> TW1-1, <i>Chaetomium globosum</i> C2F17</p>  | <p>Displayed cytotoxicity and no anti-tuberculosis activity</p> | <p>38,79</p> |
| 239 |  <p>Chemical structure of Armochaetoglobin H, similar to G but with an additional hydroxyl group on the long side chain.</p> <p><math>C_{32}H_{36}N_2O_5</math><br/>Armochaetoglobin H</p>                                                                                                                                                                 | <p><i>Chaetomium globosum</i> TW1-1</p>                                    | <p>Cytotoxicity</p>                                             | <p>79</p>    |
| 240 |  <p>Chemical structure of Armochaetoglobin I, similar to G but with an additional hydroxyl group on the long side chain in a different position.</p> <p><math>C_{32}H_{40}N_2O_4</math><br/>Armochaetoglobin I</p>                                                                                                                                        | <p><i>Chaetomium globosum</i> TW1-1, <i>Chaetomium globosum</i> YE3048</p> | <p>Displayed no cytotoxicity</p>                                | <p>62,79</p> |

|     |                                                                                                                                                                                                                                                                                                                                                                                                             |                                  |                                                     |    |
|-----|-------------------------------------------------------------------------------------------------------------------------------------------------------------------------------------------------------------------------------------------------------------------------------------------------------------------------------------------------------------------------------------------------------------|----------------------------------|-----------------------------------------------------|----|
| 241 | 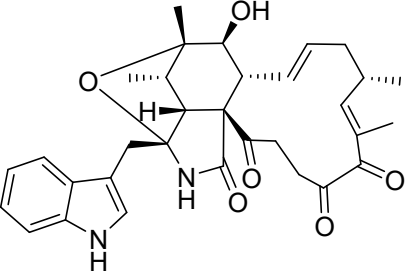 <p>Chemical structure of Armochaetoglobin J, a complex polycyclic molecule featuring a central ring system with a hydroxyl group, a methyl group, and a side chain containing a ketone and a double bond. It is substituted with an indole ring system.</p> <p><math>C_{32}H_{36}N_2O_6</math><br/>Armochaetoglobin J</p> | <i>Chaetomium globosum</i> TW1-1 | Cytotoxicity                                        | 79 |
| 242 |  <p>Chemical structure of Chaetoglobosin W, similar to Armochaetoglobin J but with an additional hydroxyl group on the side chain.</p> <p><math>C_{32}H_{38}N_2O_6</math><br/>Chaetoglobosin W</p>                                                                                                                         | <i>Chaetomium globosum</i> TW1-1 | Not determined for any relevant biological activity | 79 |
| 243 |  <p>Chemical structure of Isochaetoglobosin J, featuring a different ring system compared to the other two compounds, with a methyl group and a side chain containing a ketone and a double bond, and an indole ring system.</p> <p><math>C_{32}H_{35}N_3O_2</math><br/>Isochaetoglobosin J</p>                           | <i>Chaetomium globosum</i> TW1-1 | Not determined for any relevant biological activity | 79 |

|     |                                                                                                                                                                                                                                                                                                                                                                                                                |                                  |           |    |
|-----|----------------------------------------------------------------------------------------------------------------------------------------------------------------------------------------------------------------------------------------------------------------------------------------------------------------------------------------------------------------------------------------------------------------|----------------------------------|-----------|----|
| 244 | 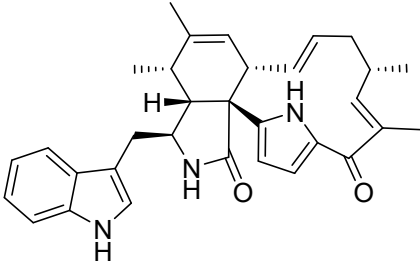 <p>Chemical structure of Armochaetoglobin K, a complex polycyclic molecule with a central bicyclic core, a benzimidazole ring system, and a decalin-like ring system. It features a methyl group, a hydrogen atom with a wedge bond, and a carbonyl group.</p> <p><math>C_{32}H_{35}N_3O_2</math><br/>Armochaetoglobin K</p> | <i>Chaetomium globosum</i> TW1-1 | Antiviral | 65 |
| 245 |  <p>Chemical structure of Armochaetoglobin L, similar to K but with an additional hydroxyl group (-OH) attached to the decalin-like ring system.</p> <p><math>C_{32}H_{35}N_3O_3</math><br/>Armochaetoglobin L</p>                                                                                                            | <i>Chaetomium globosum</i> TW1-1 | Antiviral | 65 |
| 246 |  <p>Chemical structure of Armochaetoglobin M, similar to L but with an additional oxygen atom forming a bridge between two carbons in the decalin-like ring system.</p> <p><math>C_{32}H_{35}N_3O_4</math><br/>Armochaetoglobin M</p>                                                                                        | <i>Chaetomium globosum</i> TW1-1 | Antiviral | 65 |

|     |                                                                                                                                                                                   |                                  |           |    |
|-----|-----------------------------------------------------------------------------------------------------------------------------------------------------------------------------------|----------------------------------|-----------|----|
| 247 | 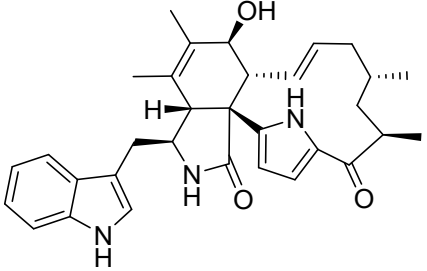 <p data-bbox="456 480 734 544"> <math>C_{32}H_{37}N_3O_3</math><br/> Armochaetoglobin N </p>    | <i>Chaetomium globosum</i> TW1-1 | Antiviral | 65 |
| 248 |  <p data-bbox="456 831 734 895"> <math>C_{32}H_{37}N_3O_3</math><br/> Armochaetoglobin O </p>    | <i>Chaetomium globosum</i> TW1-1 | Antiviral | 65 |
| 249 |  <p data-bbox="456 1182 734 1246"> <math>C_{32}H_{37}N_3O_3</math><br/> Armochaetoglobin P </p> | <i>Chaetomium globosum</i> TW1-1 | Antiviral | 65 |

|     |                                                                                                                                                                                                                                                                                                                                                                                                                 |                                                          |           |          |
|-----|-----------------------------------------------------------------------------------------------------------------------------------------------------------------------------------------------------------------------------------------------------------------------------------------------------------------------------------------------------------------------------------------------------------------|----------------------------------------------------------|-----------|----------|
| 250 | 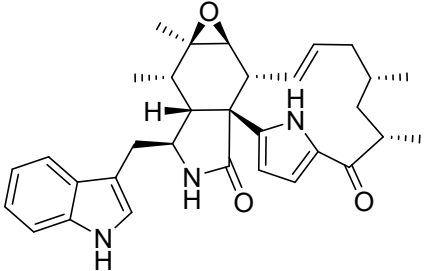 <p>Chemical structure of Armochaetoglobin Q, a complex polycyclic molecule featuring a central bicyclic core with a fused indole ring system, a lactam ring, and a decalin-like ring system. It has a molecular formula of <math>C_{32}H_{37}N_3O_3</math>.</p> <p><math>C_{32}H_{37}N_3O_3</math><br/>Armochaetoglobin Q</p> | <i>Chaetomium globosum</i> TW1-1                         | Antiviral | 65       |
| 251 |  <p>Chemical structure of Armochaetoglobin R, similar to Armochaetoglobin Q but with a hydroxyl group at the 10-position of the decalin ring. It has a molecular formula of <math>C_{32}H_{37}N_3O_3</math>.</p> <p><math>C_{32}H_{37}N_3O_3</math><br/>Armochaetoglobin R</p>                                                 | <i>Chaetomium globosum</i> TW1-1                         | Antiviral | 65       |
| 252 |  <p>Chemical structure of Penochalasin B, similar to Armochaetoglobin R but with a methyl group at the 11-position of the decalin ring. It has a molecular formula of <math>C_{32}H_{35}N_3O_3</math>.</p> <p><math>C_{32}H_{35}N_3O_3</math><br/>Penochalasin B</p>                                                          | <i>Chaetomium globosum</i> TW1-1, TY1, <i>Xylaria</i> sp | Antiviral | 65,72,84 |



|     |                                                                                                                                                                                  |                                  |                           |    |
|-----|----------------------------------------------------------------------------------------------------------------------------------------------------------------------------------|----------------------------------|---------------------------|----|
| 253 | 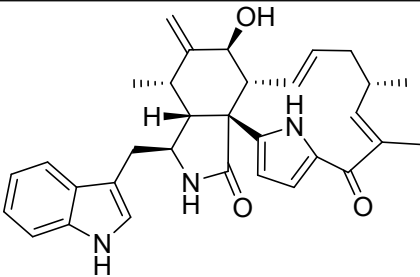 <p data-bbox="495 480 689 539"> <math>C_{32}H_{35}N_3O_3</math><br/> Penochalasin C </p>       | <i>Chaetomium globosum</i> TW1-1 | Antiviral                 | 65 |
| 254 |  <p data-bbox="465 831 719 890"> <math>C_{30}H_{36}N_2O_6</math><br/> Armochaeglobine A </p>    | <i>Chaetomium globosum</i> TW1-1 | Displayed no cytotoxicity | 60 |
| 255 |  <p data-bbox="465 1182 719 1241"> <math>C_{33}H_{40}N_2O_6</math><br/> Armochaeglobine B </p> | <i>Chaetomium globosum</i> TW1-1 | Cytotoxicity              | 60 |

|     |                                                                                                                                                                                                                                                                                                                                                                                                                                |                                         |                           |    |
|-----|--------------------------------------------------------------------------------------------------------------------------------------------------------------------------------------------------------------------------------------------------------------------------------------------------------------------------------------------------------------------------------------------------------------------------------|-----------------------------------------|---------------------------|----|
| 256 | 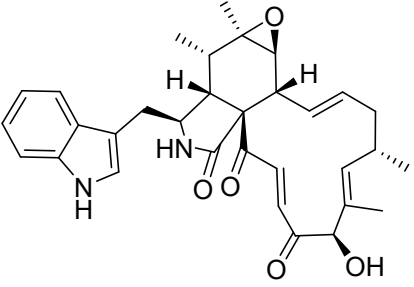 <p>Chemical structure of Armochaeglobine C, a complex polycyclic molecule featuring a central ring system with a fused indole moiety, a lactone ring, and a long unsaturated side chain with multiple hydroxyl groups. Stereochemistry is indicated with wedges and dashes.</p> <p><math>C_{32}H_{36}N_2O_5</math><br/>Armochaeglobine C</p> | <i>Chaetomium globosum</i> TW1-1        | Displayed no cytotoxicity | 60 |
| 257 |  <p>Chemical structure of Cytoglobosin H, similar to Armochaeglobine C but with an additional hydroxyl group on the side chain. Stereochemistry is indicated with wedges and dashes.</p> <p><math>C_{32}H_{40}N_2O_6</math><br/>Cytoglobosin H</p>                                                                                            | <i>Chaetomium globosum</i> MCCC 3A00607 | Cytotoxicity              | 71 |
| 258 |  <p>Chemical structure of Cytoglobosin I, similar to Cytoglobosin H but with a different stereochemistry at the hydroxyl group on the side chain. Stereochemistry is indicated with wedges and dashes.</p> <p><math>C_{32}H_{40}N_2O_6</math><br/>Cytoglobosin I</p>                                                                         | <i>Chaetomium globosum</i> MCCC 3A00607 | Displayed no cytotoxicity | 71 |

|     |                                                                                                                                                    |                                                                                                               |                                                                                                            |          |
|-----|----------------------------------------------------------------------------------------------------------------------------------------------------|---------------------------------------------------------------------------------------------------------------|------------------------------------------------------------------------------------------------------------|----------|
| 259 | 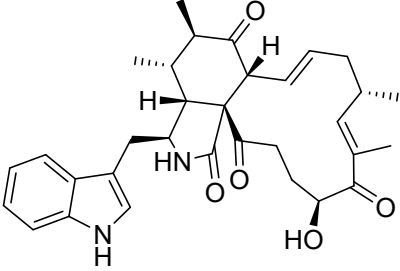 <p><math>C_{32}H_{38}N_2O_5</math><br/>Chaetoglobosin Y</p>      | <p><i>Chaetomium globosum</i> TW1-1, <i>Chaetomium globosum</i> C2F17, <i>Chaetomium tectifimeti</i> S104</p> | <p>Displayed cytotoxicity and no anti-tuberculosis activity, no antibacterial and no anti-inflammatory</p> | 38,75,76 |
| 260 |  <p><math>C_{32}H_{40}N_2O_2</math><br/>Prochaetoglobosin I</p>   | <p><i>Chaetomium globosum</i> TW1-1, <i>Chaetomium globosum</i> YE3048</p>                                    | <p>Antibacterial, antifungal,</p>                                                                          | 62,76    |
| 261 |  <p><math>C_{32}H_{38}N_2O_3</math><br/>Prochaetoglobosin II</p> | <p><i>Chaetomium globosum</i> TW1-1, <i>Chaetomium globosum</i> YE3048</p>                                    | <p>Antibacterial, antifungal,</p>                                                                          | 62,76    |

|     |                                                                                                                                                                                                                                                                                                                                                                                                                                                        |                                  |                           |    |
|-----|--------------------------------------------------------------------------------------------------------------------------------------------------------------------------------------------------------------------------------------------------------------------------------------------------------------------------------------------------------------------------------------------------------------------------------------------------------|----------------------------------|---------------------------|----|
| 262 | 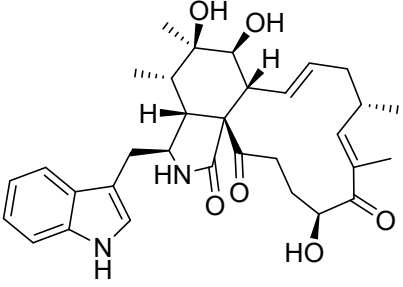 <p>Chemical structure of Armochaetoglobin S, a complex polycyclic molecule featuring a central bicyclic core with multiple hydroxyl groups, a tryptophan-like side chain, and a long unsaturated side chain with a methyl group and a ketone. Stereochemistry is indicated with wedges and dashes.</p> <p><math>C_{32}H_{41}N_2O_6</math><br/>Armochaetoglobin S</p> | <i>Chaetomium globosum</i> TW1-1 | Displayed no cytotoxicity | 76 |
| 263 |  <p>Chemical structure of 7-O-acetylarmochaetoglobin S, similar to Armochaetoglobin S but with an acetyl group (OAc) at the 7-position of the bicyclic core.</p> <p><math>C_{34}H_{42}N_2O_7</math><br/>7-O-acetylarmochaetoglobin S</p>                                                                                                                              | <i>Chaetomium globosum</i> TW1-1 | Displayed no cytotoxicity | 76 |
| 264 |  <p>Chemical structure of Armochaetoglobin T, similar to Armochaetoglobin S but with an epoxide ring fused to the bicyclic core.</p> <p><math>C_{32}H_{38}N_2O_6</math><br/>Armochaetoglobin T</p>                                                                                                                                                                   | <i>Chaetomium globosum</i> TW1-1 | Displayed no cytotoxicity | 76 |

|     |                                                                                                                                                                                                                                                                                                                                                                                                                                                               |                                                                           |                                  |              |
|-----|---------------------------------------------------------------------------------------------------------------------------------------------------------------------------------------------------------------------------------------------------------------------------------------------------------------------------------------------------------------------------------------------------------------------------------------------------------------|---------------------------------------------------------------------------|----------------------------------|--------------|
| 265 | 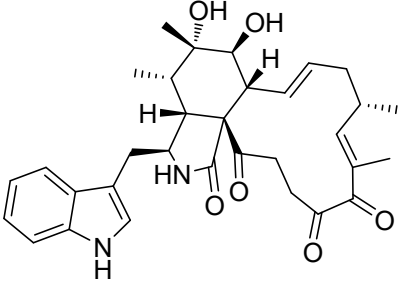 <p>Chemical structure of Armochaetoglobin U, a complex polycyclic molecule featuring a central ring system with multiple hydroxyl groups, a tryptophan-like side chain, and a long unsaturated side chain with a terminal methyl group and a ketone. Stereochemistry is indicated with wedges and dashes.</p> <p><math>C_{32}H_{38}N_2O_6</math><br/>Armochaetoglobin U</p> | <p><i>Chaetomium globosum</i> TW1-1, <i>Chaetomium madrasense</i> 375</p> | <p>Displayed no cytotoxicity</p> | <p>76,78</p> |
| 266 |  <p>Chemical structure of Armochaetoglobin V, similar to U but with an additional hydroxyl group on the long side chain. Stereochemistry is indicated with wedges and dashes.</p> <p><math>C_{32}H_{40}N_2O_6</math><br/>Armochaetoglobin V</p>                                                                                                                              | <p><i>Chaetomium globosum</i> TW1-1</p>                                   | <p>Displayed no cytotoxicity</p> | <p>76</p>    |
| 267 |  <p>Chemical structure of Armochaetoglobin W, similar to V but with a hydroxyl group on the central ring system. Stereochemistry is indicated with wedges and dashes.</p> <p><math>C_{32}H_{38}N_2O_5</math><br/>Armochaetoglobin W</p>                                                                                                                                     | <p><i>Chaetomium globosum</i> TW1-1</p>                                   | <p>Displayed no cytotoxicity</p> | <p>76</p>    |

|     |                                                                                                                                                                                                                                                                                                                                                                                                |                                  |                             |       |
|-----|------------------------------------------------------------------------------------------------------------------------------------------------------------------------------------------------------------------------------------------------------------------------------------------------------------------------------------------------------------------------------------------------|----------------------------------|-----------------------------|-------|
| 268 | 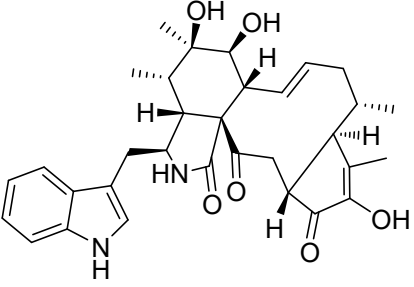 <p>Chemical structure of Armochaetoglobin X, a complex polycyclic molecule with a central ring system, multiple hydroxyl groups, and a tryptophan-like side chain. The structure is highly substituted and contains several stereocenters.</p> <p><math>C_{32}H_{38}N_2O_6</math><br/>Armochaetoglobin X</p> | <i>Chaetomium globosum</i> TW1-1 | Displayed no cytotoxicity   | 76    |
| 269 |  <p>Chemical structure of Armochaetoglobin Y, similar to X but with a different side chain and a different arrangement of hydroxyl groups. It features a complex polycyclic core with multiple stereocenters.</p> <p><math>C_{32}H_{36}N_2O_4</math><br/>Armochaetoglobin Y</p>                               | <i>Chaetomium globosum</i> TW1-1 | Cytotoxicity, antibacterial | 70,76 |
| 270 |  <p>Chemical structure of Armochaetoglobin Z, similar to Y but with a different side chain and a different arrangement of hydroxyl groups. It features a complex polycyclic core with multiple stereocenters.</p> <p><math>C_{32}H_{36}N_2O_4</math><br/>Armochaetoglobin Z</p>                              | <i>Chaetomium globosum</i> TW1-1 | Cytotoxicity                | 76    |

|     |                                                                                                                                                              |                                                                                            |                                                                 |                 |
|-----|--------------------------------------------------------------------------------------------------------------------------------------------------------------|--------------------------------------------------------------------------------------------|-----------------------------------------------------------------|-----------------|
| 271 | 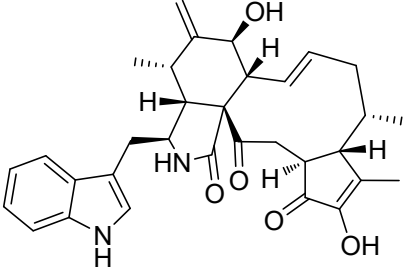 <p><math>C_{32}H_{36}N_2O_5</math><br/>Cytoglobosin A<sub>b</sub></p>      | <p><i>Chaetomium globosum</i><br/>SNSHI-5, <i>Chaetomium</i><br/><i>madrasense</i> 375</p> | <p>Displayed no<br/>cytotoxicity</p>                            | <p>68,69,78</p> |
| 272 |  <p><math>C_{32}H_{35}N_3O_3</math><br/>Isochaetoglobosin D<sub>b</sub></p> | <p><i>Chaetomium globosum</i><br/>SNSHI-5</p>                                              | <p>Cytotoxicity</p>                                             | <p>68,69</p>    |
| 273 |  <p><math>C_{30}H_{37}NO_7</math><br/>Armochaetoglasin A</p>               | <p><i>Chaetomium globosum</i> TW1-1</p>                                                    | <p>Displayed neither<br/>cytotoxicity nor<br/>antibacterial</p> | <p>82</p>       |

|     |                                                                                                                                                                                                                                                                                                                                                                                                            |                                  |                                                  |    |
|-----|------------------------------------------------------------------------------------------------------------------------------------------------------------------------------------------------------------------------------------------------------------------------------------------------------------------------------------------------------------------------------------------------------------|----------------------------------|--------------------------------------------------|----|
| 274 | 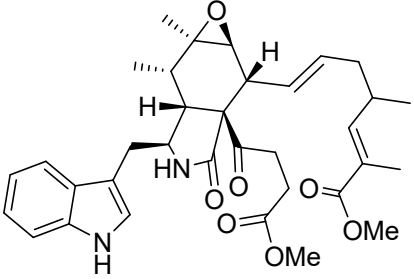 <p>Chemical structure of Armochaetoglasin B, a complex polycyclic molecule featuring a central ring system with multiple stereocenters, a tryptophan-like side chain, and a long unsaturated side chain with a methyl group and a methoxy ester group.</p> <p><math>C_{34}H_{42}N_2O_7</math><br/>Armochaetoglasin B</p> | <i>Chaetomium globosum</i> TW1-1 | Displayed cytotoxicity and no antibacterial      | 82 |
| 275 |  <p>Chemical structure of Armochaetoglasin C, similar to B but with a different side chain configuration, notably a methoxy group on the long chain.</p> <p><math>C_{33}H_{40}N_2O_5</math><br/>Armochaetoglasin C</p>                                                                                                    | <i>Chaetomium globosum</i> TW1-1 | Displayed neither cytotoxicity nor antibacterial | 82 |
| 276 |  <p>Chemical structure of Armochaetoglasin D, featuring a different side chain configuration with a ketone group on the long chain.</p> <p><math>C_{32}H_{38}N_2O_3</math><br/>Armochaetoglasin D</p>                                                                                                                    | <i>Chaetomium globosum</i> TW1-1 | Displayed neither cytotoxicity nor antibacterial | 82 |



|     |                                                                                                                                                                                                                                                                                                                                                                                                                                                                                                          |                                  |                                                  |    |
|-----|----------------------------------------------------------------------------------------------------------------------------------------------------------------------------------------------------------------------------------------------------------------------------------------------------------------------------------------------------------------------------------------------------------------------------------------------------------------------------------------------------------|----------------------------------|--------------------------------------------------|----|
| 277 | 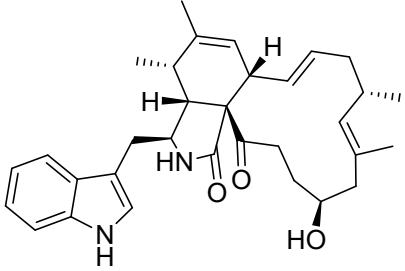 <p>Chemical structure of Armochaetoglasin E, a complex polycyclic molecule. It features a central bicyclic core with a decalin-like system. Attached to this core are a tryptophan residue (indole ring), a hydroxyl group (HO), and a long unsaturated side chain with multiple methyl groups. Stereochemistry is indicated with wedges and dashes.</p> <p><math>C_{32}H_{40}N_2O_3</math><br/>Armochaetoglasin E</p> | <i>Chaetomium globosum</i> TW1-1 | Displayed neither cytotoxicity nor antibacterial | 82 |
| 278 |  <p>Chemical structure of Armochaetoglasin F, very similar to E but with a different stereochemistry at the hydroxyl group (HO) on the side chain.</p> <p><math>C_{32}H_{40}N_2O_3</math><br/>Armochaetoglasin F</p>                                                                                                                                                                                                    | <i>Chaetomium globosum</i> TW1-1 | Displayed neither cytotoxicity nor antibacterial | 82 |
| 279 |  <p>Chemical structure of Armochaetoglasin G, similar to E and F but with a methoxy group (MeO) on the tryptophan residue and a ketone group (C=O) on the side chain.</p> <p><math>C_{33}H_{40}N_2O_5</math><br/>Armochaetoglasin G</p>                                                                                                                                                                                | <i>Chaetomium globosum</i> TW1-1 | Displayed neither cytotoxicity nor antibacterial | 82 |

|     |                                                                                                                                                                                                                                                                                                                                                                                                                      |                                                                      |                                                                   |       |
|-----|----------------------------------------------------------------------------------------------------------------------------------------------------------------------------------------------------------------------------------------------------------------------------------------------------------------------------------------------------------------------------------------------------------------------|----------------------------------------------------------------------|-------------------------------------------------------------------|-------|
| 280 | 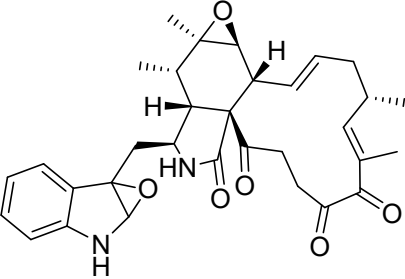 <p>Chemical structure of Armochaetoglasin H, a complex polycyclic molecule with a central ring system, a fused benzimidazole ring, and a long side chain with multiple oxygen-containing functional groups. Stereochemistry is indicated with wedges and dashes.</p> <p><math>C_{32}H_{36}N_2O_6</math><br/>Armochaetoglasin H</p> | <i>Chaetomium globosum</i> TW1-1                                     | Displayed neither cytotoxicity nor antibacterial                  | 82    |
| 281 |  <p>Chemical structure of Armochaetoglasin I, similar to H but with a different side chain configuration. Stereochemistry is indicated with wedges and dashes.</p> <p><math>C_{32}H_{36}N_2O_5</math><br/>Armochaetoglasin I</p>                                                                                                    | <i>Chaetomium globosum</i> TW1-1, <i>Chaetomium tectifimeti</i> S104 | Displayed cytotoxicity and no antibacterial, no anti-inflammatory | 75,82 |
| 282 |  <p>Chemical structure of Armochaetoglobin E, similar to H and I but with a methoxy group (OMe) on the side chain. Stereochemistry is indicated with wedges and dashes.</p> <p><math>C_{33}H_{40}N_2O_6</math><br/>Armochaetoglobin E</p>                                                                                          | <i>Chaetomium globosum</i> TW1-1                                     | Displayed neither cytotoxicity nor antibacterial                  | 82    |

|     |                                                                                                                                                                                                                                                                                                                                                              |                                                                           |                                                    |              |
|-----|--------------------------------------------------------------------------------------------------------------------------------------------------------------------------------------------------------------------------------------------------------------------------------------------------------------------------------------------------------------|---------------------------------------------------------------------------|----------------------------------------------------|--------------|
| 283 | 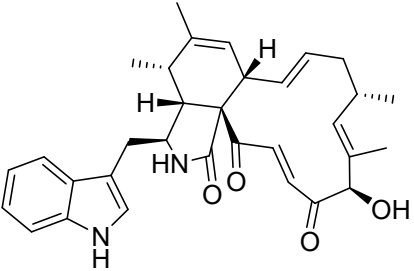 <p>Chemical structure of Chaetoglobosin J, a complex polyketide with a central bicyclic core, a tryptophan-derived side chain, and a long unsaturated side chain with multiple methyl and hydroxyl groups.</p> <p><math>C_{32}H_{36}N_2O_4</math><br/>Chaetoglobosin J</p> | <p><i>Chaetomium globosum</i> TW1-1, <i>Chaetomium globosum</i> kz-19</p> | <p>Displayed cytotoxicity and no antibacterial</p> | <p>39,82</p> |
| 284 |  <p>Chemical structure of Armochaetoglosin A, similar to Chaetoglobosin J but with a methyl group on the nitrogen of the tryptophan side chain.</p> <p><math>C_{33}H_{40}N_2O_3</math><br/>Armochaetoglosin A</p>                                                           | <p><i>Chaetomium globosum</i> TW1-1</p>                                   | <p>Antibacterial</p>                               | <p>70</p>    |
| 285 |  <p>Chemical structure of Armochaetoglosin B, similar to Armochaetoglosin A but with a hydroxyl group on the long side chain.</p> <p><math>C_{33}H_{42}N_2O_3</math><br/>Armochaetoglosin B</p>                                                                            | <p><i>Chaetomium globosum</i> TW1-1</p>                                   | <p>Antibacterial</p>                               | <p>70</p>    |

|     |                                                                                                                                                                                                                                                                                                                                                                                                                                                                         |                                     |               |    |
|-----|-------------------------------------------------------------------------------------------------------------------------------------------------------------------------------------------------------------------------------------------------------------------------------------------------------------------------------------------------------------------------------------------------------------------------------------------------------------------------|-------------------------------------|---------------|----|
| 286 | 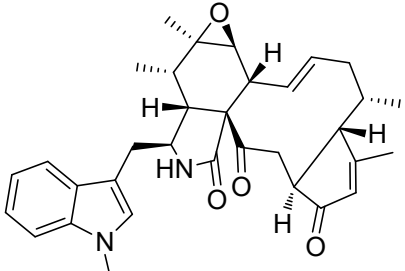 <p>Chemical structure of Armochaetoglosin C, a complex polycyclic molecule featuring a central ring system with multiple stereocenters, a fused indole ring system, and a long side chain with a terminal hydroxyl group. The structure is highly detailed with wedged and dashed bonds indicating stereochemistry.</p> <p><math>C_{33}H_{38}N_2O_4</math><br/>Armochaetoglosin C</p> | <i>Chaetomium globosum</i> TW1-1    | Antibacterial | 70 |
| 287 |  <p>Chemical structure of Chaetoglobosin T, a complex polycyclic molecule similar to Armochaetoglosin C but with a different side chain and stereochemistry. It features a central ring system, a fused indole ring system, and a long side chain with a terminal hydroxyl group.</p> <p><math>C_{32}H_{38}N_2O_3</math><br/>Chaetoglobosin T</p>                                      | <i>Chaetomium globosum</i><br>TW1-1 | Antibacterial | 70 |
| 288 |  <p>Chemical structure of Chamiside A, a complex polycyclic molecule with a central ring system, a fused indole ring system, and a long side chain with a terminal hydroxyl group. The structure is highly detailed with wedged and dashed bonds indicating stereochemistry.</p> <p><math>C_{30}H_{37}NO_6</math><br/>Chamiside A</p>                                                 | <i>Chaetomium nigricolor</i> F5     | Antibacterial | 85 |

|     |                                                                                                                                                                    |                                  |              |    |
|-----|--------------------------------------------------------------------------------------------------------------------------------------------------------------------|----------------------------------|--------------|----|
| 289 | 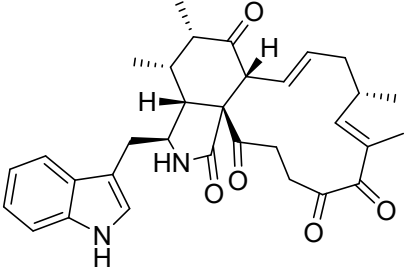 <p> <math>C_{32}H_{36}N_2O_5</math><br/>           Chaetomadrasin A         </p> | <i>Chaetomium madrasense</i> 375 | Cytotoxicity | 78 |
| 290 |  <p> <math>C_{32}H_{36}N_2O_7</math><br/>           Chaetomadrasin B         </p> | <i>Chaetomium madrasense</i> 375 | Cytotoxicity | 78 |

|            |                                                                                                                                                              |                                         |                                                                      |           |
|------------|--------------------------------------------------------------------------------------------------------------------------------------------------------------|-----------------------------------------|----------------------------------------------------------------------|-----------|
| <p>291</p> | 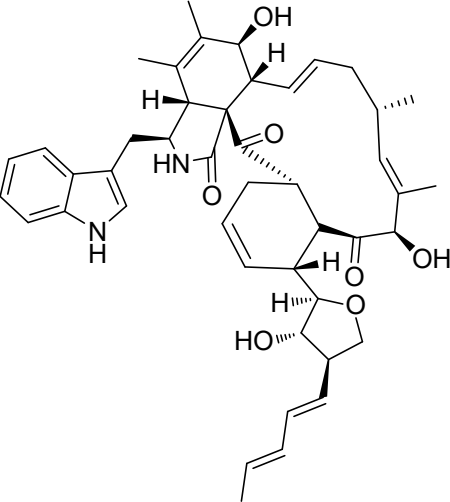 <p> <math>C_{45}H_{54}N_2O_7</math><br/> Aureochaeglobosin B </p>          | <p><i>Chaetomium globosum</i> C2F17</p> | <p>Displayed neither cytotoxicity nor anti-tuberculosis activity</p> | <p>38</p> |
| <p>292</p> |  <p> <math>C_{33}H_{40}N_2O_6</math><br/> 6-O-methyl-chaetoglobosin Q </p> | <p><i>Chaetomium globosum</i> C2F17</p> | <p>Not determined for any relevant biological activity</p>           | <p>38</p> |

|     |                                                                                                                                                                                                                                                                                                                                                                                                                                                                                                |                                   |              |    |
|-----|------------------------------------------------------------------------------------------------------------------------------------------------------------------------------------------------------------------------------------------------------------------------------------------------------------------------------------------------------------------------------------------------------------------------------------------------------------------------------------------------|-----------------------------------|--------------|----|
| 293 | 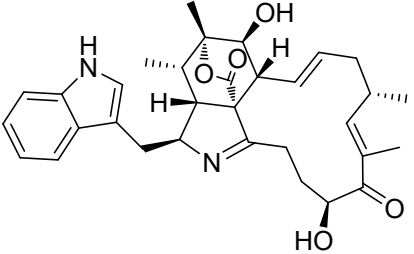 <p>Chemical structure of Pchaeglobolactone A, a complex polycyclic molecule featuring a tryptophan-derived indole ring system, a lactone ring, and a long side chain with multiple methyl groups, a double bond, and a hydroxyl group. Stereochemistry is indicated with wedges and dashes.</p> <p><math>C_{32}H_{38}N_2O_5</math><br/>Pchaeglobolactone A</p>                                               | <i>Chaetomium globosum</i> P2-2-2 | Cytotoxicity | 86 |
| 294 |  <p>Chemical structure of Spiropchaeglobosin A, a complex polycyclic molecule featuring a tryptophan-derived indole ring system, a spiro-fused ring system, a lactone ring, and a long side chain with multiple methyl groups, a double bond, a hydroxyl group, and a methoxy group. Stereochemistry is indicated with wedges and dashes.</p> <p><math>C_{33}H_{40}N_2O_6</math><br/>Spiropchaeglobosin A</p> | <i>Chaetomium globosum</i> P2-2-2 | Cytotoxicity | 86 |
| 295 |  <p>Chemical structure of Pchaeglobosal A, a complex polycyclic molecule featuring a tryptophan-derived indole ring system, a lactone ring, and a long side chain with multiple methyl groups, a double bond, and a hydroxyl group. Stereochemistry is indicated with wedges and dashes.</p> <p><math>C_{32}H_{38}N_2O_5</math><br/>Pchaeglobosal A</p>                                                      | <i>Chaetomium globosum</i> P2-2-2 | Cytotoxicity | 86 |

|     |                                                                                                                                                                                    |                                   |                                                             |    |
|-----|------------------------------------------------------------------------------------------------------------------------------------------------------------------------------------|-----------------------------------|-------------------------------------------------------------|----|
| 296 | 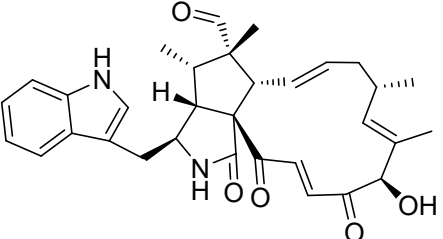 <p data-bbox="481 454 705 518"> <math>C_{32}H_{36}N_2O_5</math><br/> Pchaeglobosal B </p>        | <i>Chaetomium globosum</i> P2-2-2 | Cytotoxicity                                                | 86 |
| 297 |  <p data-bbox="459 805 728 869"> <math>C_{32}H_{38}N_2O_6</math><br/> Salchaetoglobosin A </p>    | <i>Chaetomium globosum</i> D38    | Displayed cytotoxicity<br>but no anti-inflammatory          | 73 |
| 298 |  <p data-bbox="459 1157 728 1220"> <math>C_{32}H_{38}N_2O_6</math><br/> Salchaetoglobosin B </p> | <i>Chaetomium globosum</i> D38    | Displayed neither<br>cytotoxicity nor anti-<br>inflammatory | 73 |



|     |                                                                                                                                                                                                                                                                                                                                                                                     |                                              |                                   |           |
|-----|-------------------------------------------------------------------------------------------------------------------------------------------------------------------------------------------------------------------------------------------------------------------------------------------------------------------------------------------------------------------------------------|----------------------------------------------|-----------------------------------|-----------|
| 299 | 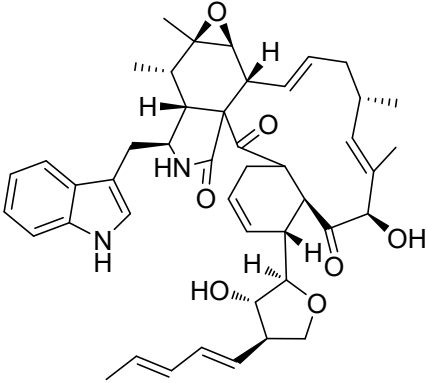 <p>Chemical structure of Aureochaeglobosin A, a complex polyketide with a central bicyclic core, a tryptophan-derived side chain, and a long unsaturated side chain with multiple hydroxyl groups and a terminal epoxide ring.</p> <p><math>C_{45}H_{54}N_2O_7</math><br/>Aureochaeglobosin A</p> | <p><i>Chaetomium globosum</i><br/>YE3048</p> | <p>Antibacterial, antifungal,</p> | <p>62</p> |
| 300 |  <p>Chemical structure of Armochaetoglobosin G, a complex polyketide with a central bicyclic core, a tryptophan-derived side chain, and a long unsaturated side chain with multiple hydroxyl groups.</p> <p><math>C_{32}H_{38}N_2O_4</math><br/>Armochaetoglobosin G</p>                           | <p><i>Chaetomium globosum</i> kz-19</p>      | <p>Cytotoxicity</p>               | <p>39</p> |
| 301 |  <p>Chemical structure of Penochalasin J, a complex polyketide with a central bicyclic core, a tryptophan-derived side chain, and a long unsaturated side chain with multiple hydroxyl groups.</p> <p><math>C_{32}H_{40}N_2O_3</math><br/>Penochalasin J</p>                                     | <p><i>Chaetomium globosum</i> kz-19</p>      | <p>Cytotoxicity</p>               | <p>39</p> |

|     |                                                                                                                                                                                                                                                                                                                                                                                         |                                  |              |    |
|-----|-----------------------------------------------------------------------------------------------------------------------------------------------------------------------------------------------------------------------------------------------------------------------------------------------------------------------------------------------------------------------------------------|----------------------------------|--------------|----|
| 302 | 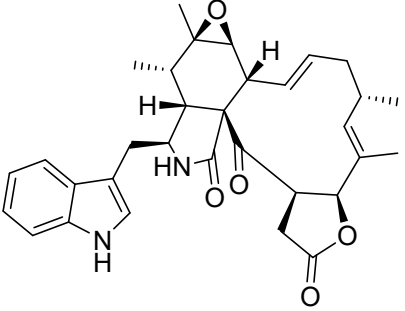 <p>Chemical structure of Phychaetoglobin A, a complex polycyclic molecule featuring a central ring system with multiple stereocenters, a tryptophan-like side chain, and a long unsaturated side chain with a terminal lactone ring.</p> <p><math>C_{32}H_{36}N_2O_5</math><br/>Phychaetoglobin A</p> | <i>Chaetomium globosum</i> kz-19 | Cytotoxicity | 39 |
| 303 |  <p>Chemical structure of Phychaetoglobin B, similar to A but with a hydroxyl group on the long side chain.</p> <p><math>C_{31}H_{38}N_2O_3</math><br/>Phychaetoglobin B</p>                                                                                                                           | <i>Chaetomium globosum</i> kz-19 | Cytotoxicity | 39 |
| 304 |  <p>Chemical structure of Phychaetoglobin C, similar to A but with an additional hydroxyl group and a different side chain configuration.</p> <p><math>C_{34}H_{40}N_2O_7</math><br/>Phychaetoglobin C</p>                                                                                            | <i>Chaetomium globosum</i> kz-19 | Cytotoxicity | 39 |

|     |                                                                                                                                                                                           |                                  |                           |    |
|-----|-------------------------------------------------------------------------------------------------------------------------------------------------------------------------------------------|----------------------------------|---------------------------|----|
| 305 | 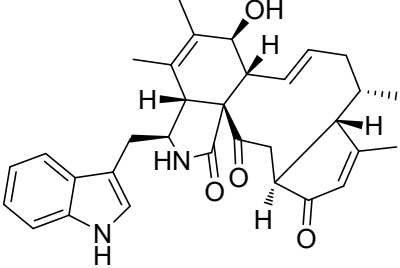 <p style="text-align: center;"> <math>C_{32}H_{36}N_2O_4</math><br/> Phychaetoglobin D </p>             | <i>Chaetomium globosum</i> kz-19 | Cytotoxicity              | 39 |
| 306 |  <p style="text-align: center;"> <math>C_{32}H_{38}N_4O_4</math><br/> Chaetoglobosin B<sub>1</sub> </p>  | <i>Chaetomium madrasense</i> 375 | Cytotoxicity              | 74 |
| 307 |  <p style="text-align: center;"> <math>C_{32}H_{40}N_4O_3</math><br/> Chaetoglobosin B<sub>2</sub> </p> | <i>Chaetomium madrasense</i> 375 | Displayed no cytotoxicity | 74 |

|     |                                                                                                                                                                                                                                                                                                                                                                                                                       |                                    |                                                                   |    |
|-----|-----------------------------------------------------------------------------------------------------------------------------------------------------------------------------------------------------------------------------------------------------------------------------------------------------------------------------------------------------------------------------------------------------------------------|------------------------------------|-------------------------------------------------------------------|----|
| 308 | 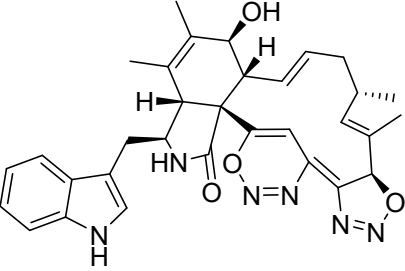 <p>Chemical structure of Chaetoglobosin B<sub>3</sub>, a complex polycyclic alkaloid. It features a central bicyclic core with a tryptophan-derived side chain, a diene system, and a diazo group. Stereochemistry is indicated with wedges and dashes.</p> <p><math>C_{32}H_{34}N_6O_4</math><br/>Chaetoglobosin B<sub>3</sub></p> | <i>Chaetomium madrasense</i> 375   | Displayed no cytotoxicity                                         | 74 |
| 309 |  <p>Chemical structure of Rubichaetoglobosin A, a complex polycyclic alkaloid. It features a central bicyclic core with a tryptophan-derived side chain, a diene system, and a hydroxyl group. Stereochemistry is indicated with wedges and dashes.</p> <p><math>C_{33}H_{42}N_2O_6</math><br/>Rubichaetoglobosin A</p>              | <i>Chaetomium tectifimeti</i> S104 | Displayed no cytotoxicity, no antibacterial, no anti-inflammatory | 75 |
| 310 |  <p>Chemical structure of Armochaetoglasin L, a complex polycyclic alkaloid. It features a central bicyclic core with a tryptophan-derived side chain, a diene system, and a methoxy group. Stereochemistry is indicated with wedges and dashes.</p> <p><math>C_{33}H_{40}N_2O_6</math><br/>Armochaetoglasin L</p>                  | <i>Chaetomium globosum</i>         | Displayed anti-inflammatory and no antibacterial                  | 87 |

|     |                                                                                                                                                                                 |                                     |                                                  |    |
|-----|---------------------------------------------------------------------------------------------------------------------------------------------------------------------------------|-------------------------------------|--------------------------------------------------|----|
| 311 | 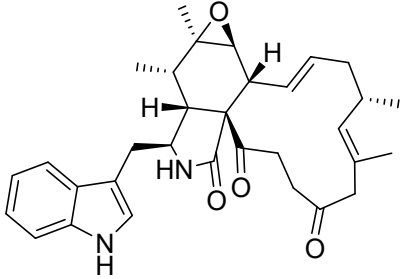 <p data-bbox="459 486 728 542"> <math>C_{32}H_{38}N_2O_4</math><br/> Armochaetoglasin M </p>  | <i>Chaetomium globosum</i>          | Displayed anti-inflammatory and no antibacterial | 87 |
| 312 |  <p data-bbox="459 965 728 1029"> <math>C_{60}H_{78}N_2O_6</math><br/> Ergochaeglobosin A </p> | <i>Chaeglobosin globosum</i> P2-2-2 | Immunosuppressive, cytotoxicity                  | 88 |

|     |                                                                                                                                                                                 |                                     |                   |    |
|-----|---------------------------------------------------------------------------------------------------------------------------------------------------------------------------------|-------------------------------------|-------------------|----|
| 313 | 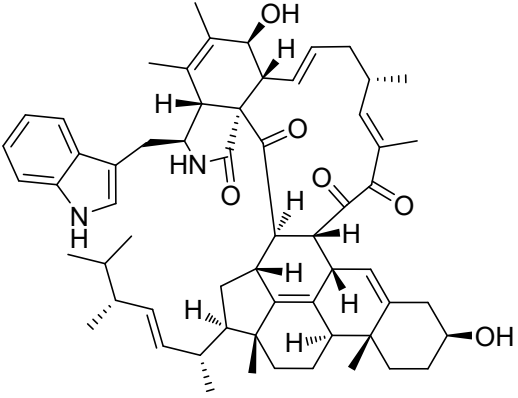 <p style="text-align: center;"> <math>C_{60}H_{76}N_2O_6</math><br/> Ergochaeglobosin B </p>  | <i>Chaeglobosin globosum</i> P2-2-2 | Immunosuppressive | 88 |
| 314 |  <p style="text-align: center;"> <math>C_{60}H_{76}N_2O_6</math><br/> Ergochaeglobosin C </p> | <i>Chaeglobosin globosum</i> P2-2-2 | Immunosuppressive | 88 |

|     |                                                                                                                                                                                 |                                     |                   |    |
|-----|---------------------------------------------------------------------------------------------------------------------------------------------------------------------------------|-------------------------------------|-------------------|----|
| 315 | 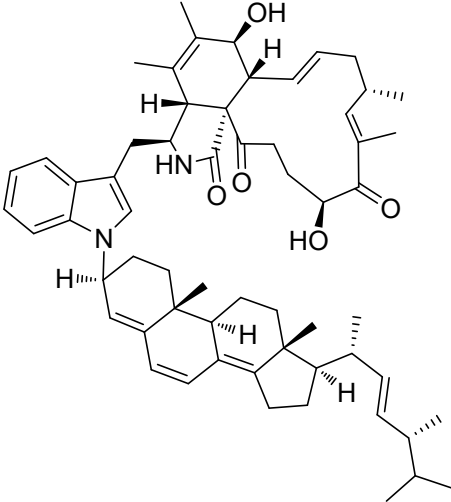 <p style="text-align: center;"> <math>C_{60}H_{78}N_2O_5</math><br/> Ergochaeglobosin D </p>  | <i>Chaeglobosin globosum</i> P2-2-2 | Immunosuppressive | 88 |
| 316 |  <p style="text-align: center;"> <math>C_{60}H_{78}N_2O_5</math><br/> Ergochaeglobosin E </p> | <i>Chaeglobosin globosum</i> P2-2-2 | Immunosuppressive | 88 |

|     |                                                                                                                                                                          |                                 |                                                                  |    |
|-----|--------------------------------------------------------------------------------------------------------------------------------------------------------------------------|---------------------------------|------------------------------------------------------------------|----|
| 317 | 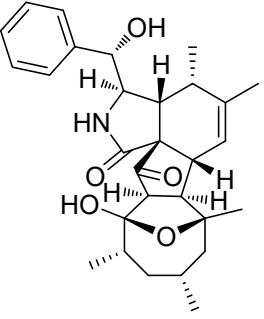 <p data-bbox="510 523 683 582"> <math>C_{29}H_{37}NO_5</math><br/> Chamiside B </p>    | <i>Chaetomium nigricolor</i> F5 | Displayed phytotoxicity,<br>no antibacterial, no<br>anticandidal | 89 |
| 318 |  <p data-bbox="510 917 683 976"> <math>C_{29}H_{37}NO_4</math><br/> Chamiside C </p>    | <i>Chaetomium nigricolor</i> F5 | Displayed no<br>antibacterial, no<br>anticandidal                | 89 |
| 319 |  <p data-bbox="510 1311 683 1370"> <math>C_{29}H_{35}NO_4</math><br/> Chamiside D </p> | <i>Chaetomium nigricolor</i> F5 | Displayed no<br>antibacterial, no<br>anticandidal                | 89 |



|            |                                                                                                                                                             |                                        |                                                                      |           |
|------------|-------------------------------------------------------------------------------------------------------------------------------------------------------------|----------------------------------------|----------------------------------------------------------------------|-----------|
| <p>320</p> | 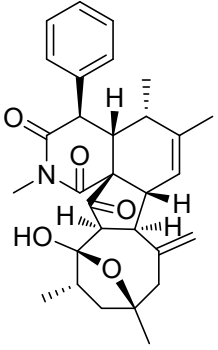 <p> <math>C_{30}H_{35}NO_5</math><br/>           Chamiside E         </p> | <p><i>Chaetomium nigricolor</i> F5</p> | <p>Displayed no antibacterial, no anticandidal</p>                   | <p>89</p> |
| <p>321</p> |  <p> <math>C_{30}H_{39}NO_7</math><br/>           Chamiside F         </p> | <p><i>Chaetomium nigricolor</i> F5</p> | <p>Displayed no phytotoxicity, no antibacterial, no anticandidal</p> | <p>89</p> |

|     |                                                                                                                                                                                      |                                                                         |                                                     |       |
|-----|--------------------------------------------------------------------------------------------------------------------------------------------------------------------------------------|-------------------------------------------------------------------------|-----------------------------------------------------|-------|
| 322 | 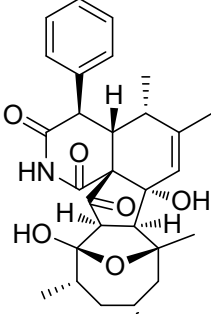 <p style="text-align: center;">C<sub>29</sub>H<sub>35</sub>NO<sub>6</sub><br/>Chaetoconvosin C</p> | <i>Chaetomium nigricolor</i> F5                                         | Displayed no antibacterial, no anticandidal         | 89    |
| 323 |  <p style="text-align: center;">C<sub>30</sub>H<sub>37</sub>NO<sub>5</sub><br/>Chaetoconvosin D</p> | <i>Chaetomium nigricolor</i> F5                                         | Displayed no antibacterial, no anticandidal         | 89    |
| 324 |  <p style="text-align: center;">C<sub>28</sub>H<sub>33</sub>NO<sub>4</sub><br/>Arthriniumn A</p>  | <i>Arthrinium arundinis</i> ZSDS1-F3, <i>Arthrinium arundinis</i> DJ-13 | Displayed neither cytotoxicity nor antituberculosis | 31,32 |

|     |                                                                                                                                                                                      |                                                                                                            |                                                                                                                         |                                          |
|-----|--------------------------------------------------------------------------------------------------------------------------------------------------------------------------------------|------------------------------------------------------------------------------------------------------------|-------------------------------------------------------------------------------------------------------------------------|------------------------------------------|
| 325 | 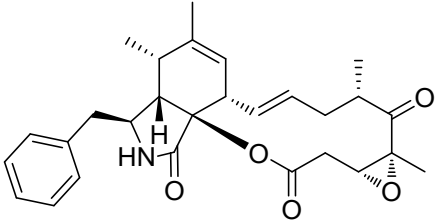 <p style="text-align: center;">C<sub>28</sub>H<sub>33</sub>NO<sub>4</sub><br/>Arthriniumnin B</p>  | <p style="text-align: center;"><i>Arthrinium arundinis</i> ZSDS1-F3, <i>Arthrinium arundinis</i> DJ-13</p> | <p style="text-align: center;">Displayed neither cytotoxicity nor antituberculosis</p>                                  | <p style="text-align: center;">31,32</p> |
| 326 |  <p style="text-align: center;">C<sub>28</sub>H<sub>33</sub>NO<sub>5</sub><br/>Arthriniumnin C</p>  | <p style="text-align: center;"><i>Arthrinium arundinis</i> ZSDS1-F3, <i>Arthrinium arundinis</i> DJ-13</p> | <p style="text-align: center;">Not determined for any relevant biological activity</p>                                  | <p style="text-align: center;">31,32</p> |
| 327 |  <p style="text-align: center;">C<sub>28</sub>H<sub>35</sub>NO<sub>5</sub><br/>Arthriniumnin D</p> | <p style="text-align: center;"><i>Arthrinium arundinis</i> ZSDS1-F3, <i>Arthrinium arundinis</i> DJ-13</p> | <p style="text-align: center;">Displayed neither cytotoxicity nor antituberculosis</p>                                  | <p style="text-align: center;">31,32</p> |
| 328 |  <p style="text-align: center;">C<sub>28</sub>H<sub>33</sub>NO<sub>3</sub></p>                    | <p style="text-align: center;"><i>Arthrinium arundinis</i> ZSDS1-F3, <i>Daldinia sacchari</i></p>          | <p style="text-align: center;">Displayed neither cytotoxicity nor antituberculosis, but showed antimicrobial effect</p> | <p style="text-align: center;">31,90</p> |

|     | Ketocytochalasin                                                                                                                                                                    |                                                                                |                                                     |       |
|-----|-------------------------------------------------------------------------------------------------------------------------------------------------------------------------------------|--------------------------------------------------------------------------------|-----------------------------------------------------|-------|
| 329 | 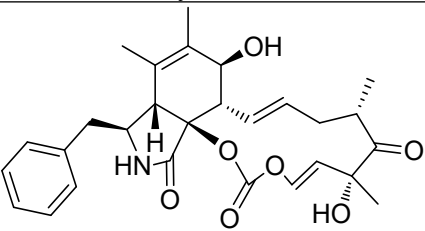 <p>C<sub>28</sub>H<sub>33</sub>NO<sub>7</sub><br/>Cytochalasin K</p>                              | <i>Arthrinium arundinis</i> ZSDS1-F3, <i>Dematophora necatrix</i> (MUCL 57709) | Displayed cytotoxicity and no antituberculosis      | 31,91 |
| 330 |  <p>C<sub>28</sub>H<sub>33</sub>NO<sub>5</sub><br/>Cytocalasin Z<sub>16</sub></p>                  | <i>Arthrinium arundinis</i> ZSDS1-F3                                           | Displayed neither cytotoxicity nor antituberculosis | 31    |
| 331 |  <p>C<sub>28</sub>H<sub>33</sub>NO<sub>5</sub><br/>10-phenyl-[12]-cytochalasin Z<sub>16</sub></p> | <i>Arthrinium arundinis</i> ZSDS1-F3                                           | Displayed cytotoxicity and no antituberculosis      | 31    |
| 332 |                                                                                                  | <i>Arthrinium arundinis</i> ZSDS1-F3                                           | Displayed neither cytotoxicity nor antituberculosis | 31    |

|     |                                                                                                                                                              |                                   |                                                                  |    |
|-----|--------------------------------------------------------------------------------------------------------------------------------------------------------------|-----------------------------------|------------------------------------------------------------------|----|
|     | $C_{28}H_{33}NO_5$<br>Cytochalasin Z17                                                                                                                       |                                   |                                                                  |    |
| 333 | 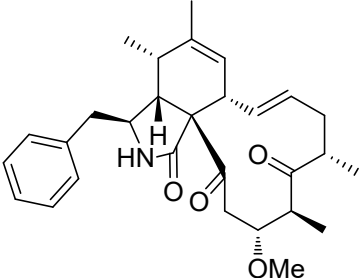 <p> <math>C_{29}H_{37}NO_4</math><br/>           Arundisin A         </p>  | <i>Arthrinium arundinis</i> DJ-13 | Displayed cytotoxicity,<br>no antibacterial and no<br>antifungal | 32 |
| 334 |  <p> <math>C_{28}H_{35}NO_4</math><br/>           Arundisin B         </p>  | <i>Arthrinium arundinis</i> DJ-13 | Displayed cytotoxicity,<br>no antibacterial and no<br>antifungal | 32 |
| 335 |  <p> <math>C_{28}H_{35}NO_4</math><br/>           Arundisin C         </p> | <i>Arthrinium arundinis</i> DJ-13 | Displayed cytotoxicity,<br>no antibacterial and no<br>antifungal | 32 |

|     |                                                                                                                                                                                    |                                   |                                                             |    |
|-----|------------------------------------------------------------------------------------------------------------------------------------------------------------------------------------|-----------------------------------|-------------------------------------------------------------|----|
| 336 | 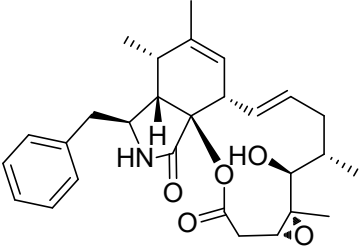 <p data-bbox="515 454 672 510">C<sub>28</sub>H<sub>35</sub>NO<sub>5</sub><br/>Arundisin D</p>    | <i>Arthrinium arundinis</i> DJ-13 | Displayed antifungal, no cytotoxicity, and no antibacterial | 32 |
| 337 |  <p data-bbox="515 782 672 837">C<sub>28</sub>H<sub>35</sub>NO<sub>5</sub><br/>Arundisin E</p>    | <i>Arthrinium arundinis</i> DJ-13 | Not determined for any relevant biological activity         | 32 |
| 338 |  <p data-bbox="515 1101 672 1157">C<sub>28</sub>H<sub>33</sub>NO<sub>5</sub><br/>Arundisin F</p> | <i>Arthrinium arundinis</i> DJ-13 | Displayed antibacterial, no cytotoxicity, and no antifungal | 32 |
| 339 |                                                                                                 | <i>Arthrinium arundinis</i> DJ-13 | Not determined for any relevant biological activity         | 32 |

|     |                                                                                                                                                                                                                                                                                                  |                                   |                                                     |       |
|-----|--------------------------------------------------------------------------------------------------------------------------------------------------------------------------------------------------------------------------------------------------------------------------------------------------|-----------------------------------|-----------------------------------------------------|-------|
|     | $C_{25}H_{35}NO_5$<br>Cytochalasin Z12                                                                                                                                                                                                                                                           |                                   |                                                     |       |
| 340 | 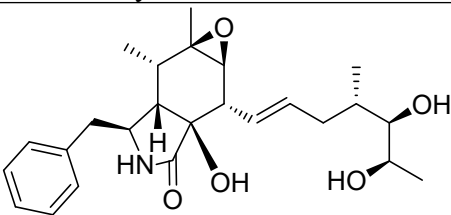 <p>Chemical structure of Cytochalasin Z12, a bicyclic compound with a phenyl group, a hydroxyl group, and a side chain with two hydroxyl groups.</p> $C_{25}H_{35}NO_5$<br>Cytochalasin Z21                    | <i>Arthrinium arundinis</i> DJ-13 | Not determined for any relevant biological activity | 32    |
| 341 |  <p>Chemical structure of Cytochalasin Z24, a bicyclic compound with a p-hydroxybenzyl group, a hydroxyl group, and a side chain with a ketone and a hydroxyl group.</p> $C_{28}H_{33}NO_5$<br>Cytochalasin Z24 | <i>Eutypella</i> sp. D-1          | Cytotoxicity                                        | 92,93 |
| 342 |  <p>Chemical structure of Cytochalasin Z25, a bicyclic compound with a p-hydroxybenzyl group, a hydroxyl group, and a side chain with a hydroxyl group.</p> $C_{28}H_{35}NO_5$<br>Cytochalasin Z25             | <i>Eutypella</i> sp. D-1          | Cytotoxicity                                        | 92,93 |

|     |                                                                                                                                                                                                                                                                                                                                                  |                                     |                                                    |       |
|-----|--------------------------------------------------------------------------------------------------------------------------------------------------------------------------------------------------------------------------------------------------------------------------------------------------------------------------------------------------|-------------------------------------|----------------------------------------------------|-------|
| 343 | 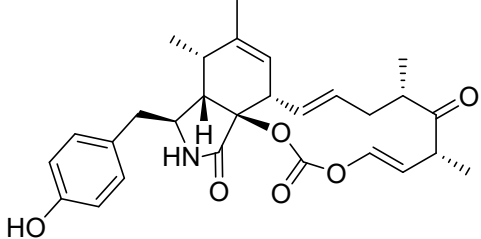 <p style="text-align: center;"> <math>C_{28}H_{33}NO_6</math><br/>           Cytochalasin Z26         </p>                                                                                                                                                     | <i>Eutypella</i> sp. D-1            | Displayed no cytotoxicity                          | 92,93 |
| 344 |  <p style="text-align: center;"> <math>C_{29}H_{37}NO_9</math><br/>           Scoparasin B         </p>                                                                                                                                                         | <i>Eutypella</i> sp. D-1            | Cytotoxicity                                       | 92,93 |
| 345 |  <p style="text-align: center;"> <math>C_{28}H_{37}NO_4</math><br/>           [11]-cytochalasin- 5(6),13-diene-1,21-dione-<br/>           7,18-dihydroxy-16,18-dimethyl-10-phenyl-<br/>           (7<i>S</i>*,13<i>E</i>,16<i>S</i>*,18<i>R</i>*)         </p> | <i>Daldinia eschscholtzii</i> HJ001 | Displayed no cytotoxicity but showed antibacterial | 94    |



|     |                                                                                                                                                                                                                                                                   |                                                                                                      |                                                                                |           |
|-----|-------------------------------------------------------------------------------------------------------------------------------------------------------------------------------------------------------------------------------------------------------------------|------------------------------------------------------------------------------------------------------|--------------------------------------------------------------------------------|-----------|
| 346 | 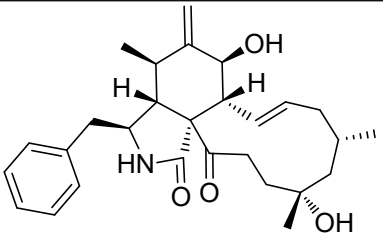 <p style="text-align: center;"> <math>C_{28}H_{37}NO_4</math><br/> [11]-cytochalasa-6(12),13-diene-1,21-dione-7,18-dihydroxy 16,18-dimethyl-10-phenyl- (7S*,13E,16S*,18R*) </p> | <i>Daldinia eschscholtzii</i> HJ001,<br><i>Daldinia concentrica</i> ,<br><i>Hypoxyton fragiforme</i> | Displayed cytotoxicity,<br>no antibacterial,<br>nematicidal, and<br>antifungal | 6,9,94,95 |
| 347 |  <p style="text-align: center;"> <math>C_{28}H_{35}NO_2</math><br/> Saccalasin A </p>                                                                                            | <i>Daldinia sacchari</i>                                                                             | Displayed cytotoxicity, no<br>antimicrobial effect,<br>antibiofilm             | 6,53,90   |
| 348 |  <p style="text-align: center;"> <math>C_{28}H_{33}NO_4</math><br/> Saccalasin B </p>                                                                                           | <i>Daldinia sacchari</i>                                                                             | Displayed cytotoxicity and<br>antimicrobial effects                            | 90        |
| 349 |                                                                                                                                                                                | <i>Daldinia sacchari</i> , <i>Daldinia eschscholtzii</i> BBH42278                                    | Displayed cytotoxicity<br>antimicrobial effects,<br>antibiofilm                | 6,53,90   |

|     |                                                                                                                                             |                                           |                                                                                           |        |
|-----|---------------------------------------------------------------------------------------------------------------------------------------------|-------------------------------------------|-------------------------------------------------------------------------------------------|--------|
|     | $C_{28}H_{35}NO_3$<br>(16 <i>S</i> ,17 <i>R</i> ,18 <i>S</i> )-16,18-dimethyl-17-hydroxy-10-phenyl[11]cytochalasa-6,13,19-triene 1,21-dione |                                           |                                                                                           |        |
| 350 | 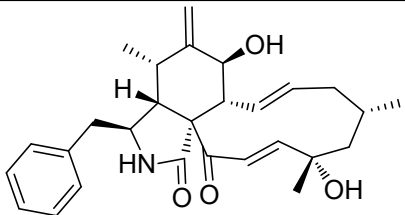<br>$C_{28}H_{35}NO_4$                                     | <i>Daldinia eschscholtzii</i><br>BBH42278 | Antibacterial, antibiofilm,<br>nematicidal, antifungal,<br>and actin disruption<br>effect | 6,9,53 |
| 351 | <br>$C_{28}H_{35}NO_3$                                     | <i>Daldinia eschscholtzii</i><br>BBH42278 | Antibacterial, antibiofilm<br>actin disruption effect                                     | 6,53   |
| 352 | <br>$C_{28}H_{35}NO_3$                                    | <i>Daldinia eschscholtzii</i><br>BBH42278 | Antibacterial, antibiofilm<br>actin disruption effect                                     | 6,53   |
| 353 | <br>$C_{28}H_{35}NO_4$                                   | <i>Daldinia eschscholtzii</i><br>BBH42278 | Antibacterial, antibiofilm<br>actin disruption effect                                     | 6,53   |

|     |                                                                                                                                                                                                                                                                                                                                                                                                                                                                    |                               |                                              |      |
|-----|--------------------------------------------------------------------------------------------------------------------------------------------------------------------------------------------------------------------------------------------------------------------------------------------------------------------------------------------------------------------------------------------------------------------------------------------------------------------|-------------------------------|----------------------------------------------|------|
| 354 | 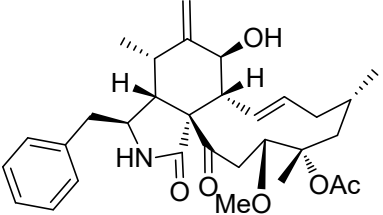 <p>Chemical structure of Daldinin, a complex polycyclic molecule with a phenyl group, a methyl group, a hydroxyl group, a methoxy group, and an acetoxy group.</p> <p><math>C_{31}H_{41}NO_6</math><br/>Daldinin</p>                                                                                                                                                             | <i>Daldinia concentrica</i>   | Cytotoxicity                                 | 95   |
| 355 |  <p>Chemical structure of [11]-cytochalasa-6(12),13-diene-1,21-dione-7,18,19-trihydroxy-16,18-dimethyl-10-phenyl- (7S*,13E,16S*,18S*,19R*), featuring a phenyl group, two methyl groups, and three hydroxyl groups.</p> <p><math>C_{28}H_{37}NO_5</math><br/>[11]-cytochalasa-6(12),13-diene-1,21-dione-7,18,19-trihydroxy-16,18-dimethyl-10-phenyl- (7S*,13E,16S*,18S*,19R*)</p> | <i>Daldinia concentrica</i>   | Cytotoxicity, nematocidal, and antimicrobial | 9,95 |
| 356 |  <p>Chemical structure of (7S,13E,16S,18S,19E)16,18-dimethyl-6,7-epoxy-18-hydroxy-10-phenyl-[11]-cytochalasa-13,19-diene-1,21-dione, featuring a phenyl group, two methyl groups, an epoxy group, and a hydroxyl group.</p> <p><math>C_{28}H_{35}NO_4</math><br/>(7S,13E,16S,18S,19E)16,18-dimethyl-6,7-epoxy-18-hydroxy-10-phenyl-[11]-cytochalasa-13,19-diene-1,21-dione</p>   | <i>Daldinia eschscholtzii</i> | Actin disruption effect                      | 6    |

|     |                                                                                                                                                                                                                                                                                                                                                                                                                                                                                                                                                                                                                                                                                                                                                                                                                                                                                 |                                                                      |                                                       |      |
|-----|---------------------------------------------------------------------------------------------------------------------------------------------------------------------------------------------------------------------------------------------------------------------------------------------------------------------------------------------------------------------------------------------------------------------------------------------------------------------------------------------------------------------------------------------------------------------------------------------------------------------------------------------------------------------------------------------------------------------------------------------------------------------------------------------------------------------------------------------------------------------------------|----------------------------------------------------------------------|-------------------------------------------------------|------|
| 357 | 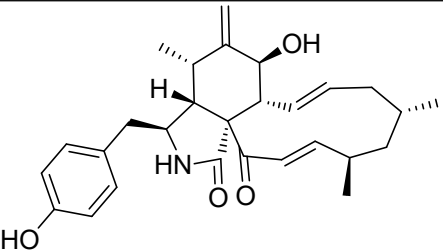 <p>Chemical structure of Phenochalasin C, a complex polyketide derivative. It features a central six-membered ring with a methyl group, a hydroxyl group, and a piperidine ring. A p-4-hydroxybenzyl group is attached to the piperidine ring. The central ring is also substituted with a methyl group, a hydroxyl group, and a piperidine ring. A piperidine ring is attached to the central ring via a methylene group. The piperidine ring has a methyl group and a hydroxyl group. The central ring is also substituted with a methyl group, a hydroxyl group, and a piperidine ring. A piperidine ring is attached to the central ring via a methylene group. The piperidine ring has a methyl group and a hydroxyl group.</p> <p><math>C_{28}H_{35}NO_4</math><br/>Phenochalasin C</p> | <i>Daldinia kretschmarioides</i> ,<br><i>H. cf. kretschmarioides</i> | Antibacterial, antibiofilm<br>actin disruption effect | 6,53 |
| 358 |  <p>Chemical structure of Phenochalasin D, a complex polyketide derivative. It features a central six-membered ring with a methyl group, a hydroxyl group, and a piperidine ring. A p-4-hydroxybenzyl group is attached to the piperidine ring. The central ring is also substituted with a methyl group, a hydroxyl group, and a piperidine ring. A piperidine ring is attached to the central ring via a methylene group. The piperidine ring has a methyl group and a hydroxyl group. The central ring is also substituted with a methyl group, a hydroxyl group, and a piperidine ring. A piperidine ring is attached to the central ring via a methylene group. The piperidine ring has a methyl group and a hydroxyl group.</p> <p><math>C_{28}H_{35}NO_3</math><br/>Phenochalasin D</p> | <i>Daldinia kretschmarioides</i> ,<br><i>H. cf. kretschmarioides</i> | Antibacterial and<br>antibiofilm                      | 6    |
| 359 |  <p>Chemical structure of Fragiformin A, a complex polyketide derivative. It features a central six-membered ring with a methyl group, a hydroxyl group, and a piperidine ring. A benzyl group is attached to the piperidine ring. The central ring is also substituted with a methyl group, a hydroxyl group, and a piperidine ring. A piperidine ring is attached to the central ring via a methylene group. The piperidine ring has a methyl group and a hydroxyl group. The central ring is also substituted with a methyl group, a hydroxyl group, and a piperidine ring. A piperidine ring is attached to the central ring via a methylene group. The piperidine ring has a methyl group and a hydroxyl group.</p> <p><math>C_{28}H_{35}NO_4</math><br/>Fragiformin A</p>               | <i>Hypoxylon fragiforme</i> , <i>H.</i><br><i>howeanum</i>           | Nematicidal, and<br>antimicrobial                     | 9    |
| 360 |  <p>Chemical structure of Fragiformin A, a complex polyketide derivative. It features a central six-membered ring with a methyl group, a hydroxyl group, and a piperidine ring. A benzyl group is attached to the piperidine ring. The central ring is also substituted with a methyl group, a hydroxyl group, and a piperidine ring. A piperidine ring is attached to the central ring via a methylene group. The piperidine ring has a methyl group and a hydroxyl group. The central ring is also substituted with a methyl group, a hydroxyl group, and a piperidine ring. A piperidine ring is attached to the central ring via a methylene group. The piperidine ring has a methyl group and a hydroxyl group.</p> <p><math>C_{28}H_{35}NO_4</math></p>                                | <i>Hypoxylon fragiforme</i> , <i>H.</i><br><i>howeanum</i>           | Nematicidal, and<br>antimicrobial                     | 9,49 |

|     |                                                                                                                                                                                                                          |                                 |                               |    |
|-----|--------------------------------------------------------------------------------------------------------------------------------------------------------------------------------------------------------------------------|---------------------------------|-------------------------------|----|
| 361 | <p style="text-align: center;"><b>Fragiformin B</b></p> 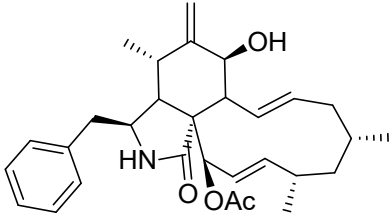 <p style="text-align: center;"><math>C_{30}H_{39}NO_4</math><br/>L-696,474</p> | <i>Hypoxyton fragiforme</i>     | Antibacterial and antibiofilm | 53 |
| 362 | <p style="text-align: center;"><b>Fragiformin C</b></p>  <p style="text-align: center;"><math>C_{28}H_{35}NO_4</math></p>               | <i>Hypoxyton fragiforme</i>     | Actin disruption effect       | 6  |
| 363 | <p style="text-align: center;"><b>Fragiformin D</b></p>  <p style="text-align: center;"><math>C_{28}H_{35}NO_4</math></p>              | <i>Hypoxyton fragiforme</i>     | Actin disruption effect       | 6  |
| 364 |  <p style="text-align: center;"><math>C_{28}H_{35}NO_5</math></p>                                                                     | <i>Hypoxyton fuscum</i> complex | Actin disruption effect       | 96 |

|     | Pseudofuscochalsin A                                                                                                                                               |                                                                                                                                                                                                                              |                                                                                                  |                        |
|-----|--------------------------------------------------------------------------------------------------------------------------------------------------------------------|------------------------------------------------------------------------------------------------------------------------------------------------------------------------------------------------------------------------------|--------------------------------------------------------------------------------------------------|------------------------|
| 365 | 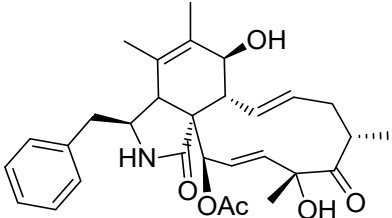 <p>C<sub>30</sub>H<sub>37</sub>NO<sub>5</sub><br/>Cytochalasin C</p>             | <p><i>Hypoxylon fuscum</i> complex,<br/><i>Rosellinia sanctae-cruciana</i>,<br/><i>Xylaria longipes</i>, <i>Xylaria</i><br/><i>arbuscula</i> GZS74</p>                                                                       | <p>Cytotoxicity,<br/>nematicidal,<br/>antimicrobial, and actin<br/>disruption effect</p>         | <p>9,56,57,96–98</p>   |
| 366 |  <p>C<sub>30</sub>H<sub>37</sub>NO<sub>6</sub><br/>Cytochalasin D</p>             | <p><i>Rosellinia sanctae-cruciana</i>,<br/><i>Xylaria longipes</i>, <i>Xylaria</i><br/><i>arbuscula</i> GZS74</p>                                                                                                            | <p>Cytotoxicity</p>                                                                              | <p>56,57,97,98</p>     |
| 367 |  <p>C<sub>28</sub>H<sub>33</sub>NO<sub>5</sub><br/>19,20-epoxycytochalasin D</p> | <p><i>Rosellinia sanctae-cruciana</i>,<br/><i>Rosellinia rickii</i> <i>Xylaria</i><br/><i>arbuscula</i> GZS74, <i>Xylaria cf.</i><br/><i>curta</i>, <i>Xylaria</i> sp, <i>Xylaria</i><br/><i>karyophthora</i> NRRL 66613</p> | <p>Cytotoxicity,<br/>antibacterial, antifungal,<br/>antibiofilm, actin<br/>disruption effect</p> | <p>53,57,84,97–100</p> |
| 368 |                                                                                 | <p><i>Rosellinia sanctae-cruciana</i>,<br/><i>Rosellinia rickii</i> <i>Xylaria</i><br/><i>arbuscula</i> GZS74, <i>Xylaria cf.</i><br/><i>curta</i>, <i>Xylaria karyophthora</i><br/>NRRL 66613</p>                           | <p>Cytotoxicity,<br/>Antibacterial, antifungal,<br/>antibiofilm, actin<br/>disruption effect</p> | <p>53,57,97–100</p>    |

|     |                                                                                                                                                                                                                                                                                                  |                                                                   |                             |        |
|-----|--------------------------------------------------------------------------------------------------------------------------------------------------------------------------------------------------------------------------------------------------------------------------------------------------|-------------------------------------------------------------------|-----------------------------|--------|
|     | $C_{30}H_{37}NO_7$<br>19,20-epoxycytochalasin C                                                                                                                                                                                                                                                  |                                                                   |                             |        |
| 369 | 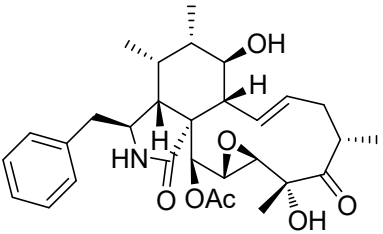 <p>The structure shows a complex polycyclic core with a benzyl group, an acetate group, and a 19,20-epoxide ring. Stereochemistry is indicated with wedges and dashes.</p> $C_{30}H_{39}NO_7$<br>Jammosporin A | <i>Rosellinia sanctae-cruciana</i>                                | Cytotoxicity                | 97,98  |
| 370 |  <p>The structure is similar to 19,20-epoxycytochalasin C but features an additional epoxide ring on the side chain.</p> $C_{30}H_{37}NO_8$<br>19,20-epoxycytochalasin N                                        | <i>Rosellinia rickii</i> , <i>Xylaria karyophthora</i> NRRL 66613 | Antibacterial, cytotoxicity | 53,100 |
| 371 |  <p>The structure is similar to 19,20-epoxycytochalasin C but lacks the acetate group at the 18-position.</p> $C_{30}H_{37}NO_6$<br>18-deoxy-19,20-epoxycytochalasin Q                                         | <i>Rosellinia rickii</i>                                          | Antibacterial               | 53     |

|     |                                                                                                                                                                                                                |                                                                                   |              |        |
|-----|----------------------------------------------------------------------------------------------------------------------------------------------------------------------------------------------------------------|-----------------------------------------------------------------------------------|--------------|--------|
| 372 | 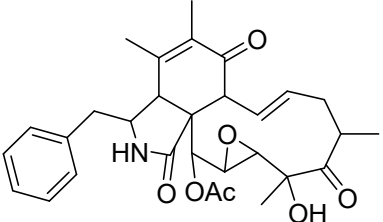 <p style="text-align: center;"> <math>C_{30}H_{35}NO_7</math><br/>           19,20-epoxycytochalasin C         </p>          | <i>Rosellinia sanctae-cruciana</i>                                                | Cytotoxicity | 98     |
| 373 |  <p style="text-align: center;"> <math>C_{28}H_{35}NO_5</math><br/>           deacetyl 19,20-epoxycytochalasin C         </p> | <i>Rosellinia sanctae-cruciana</i>                                                | Cytotoxicity | 98     |
| 374 |  <p style="text-align: center;"> <math>C_{30}H_{39}NO_8</math><br/>           Cytochalasin P1         </p>                   | <i>Rosellinia sanctae-cruciana</i> ,<br><i>Xylaria karyophthora</i> NRRL<br>66613 | Cytotoxicity | 98,100 |
| 375 |  <p style="text-align: center;"> <math>C_{30}H_{37}NO_8</math> </p>                                                         | <i>Rosellinia sanctae-cruciana</i>                                                | Cytotoxicity | 101    |



|     | 19,20-epoxycytochalasin N1                                                                                                                                              |                                                                         |                                                                                                                                                            |        |
|-----|-------------------------------------------------------------------------------------------------------------------------------------------------------------------------|-------------------------------------------------------------------------|------------------------------------------------------------------------------------------------------------------------------------------------------------|--------|
| 376 | 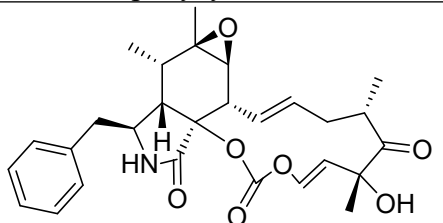 <p>C<sub>28</sub>H<sub>33</sub>NO<sub>7</sub><br/>Cytochalasin E</p>                  | <i>Dematophora necatrix</i><br>(MUCL 57709), <i>Xylaria</i> sp.<br>XC16 | Anti- <i>Saccharomyces pombe</i> , with MIC value of 16.8 μM, cytotoxicity, F-actin network disruptors, brine shrimp toxicity, phytotoxicity, antipathogen | 91,102 |
| 377 |  <p>C<sub>28</sub>H<sub>33</sub>NO<sub>7</sub><br/>Δ<sup>6,12</sup>-cytochalasin E</p> | <i>Dematophora necatrix</i><br>(MUCL 57709)                             | Cytotoxicity, F-actin network disruptors                                                                                                                   | 91     |
| 378 |  <p>C<sub>28</sub>H<sub>33</sub>NO<sub>6</sub><br/>Cytochalasins Z<sub>27</sub></p>   | <i>Xylaria</i> sp. XC16                                                 | Brine shrimp toxicity, no phytotoxicity, antipathogen                                                                                                      | 102    |

|     |                                                                                                                                                                                                                                                                                                                                                                                                                                                                                                                      |                         |                                                       |     |
|-----|----------------------------------------------------------------------------------------------------------------------------------------------------------------------------------------------------------------------------------------------------------------------------------------------------------------------------------------------------------------------------------------------------------------------------------------------------------------------------------------------------------------------|-------------------------|-------------------------------------------------------|-----|
| 379 | 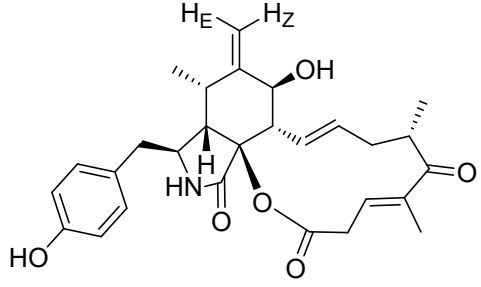 <p>Chemical structure of Cytochalasin Z<sub>28</sub>, a bicyclic compound with a piperidine ring fused to a cyclohexane ring. It features a 4-hydroxybenzyl group, a hydroxyl group, and a long unsaturated side chain with a terminal methyl group. The molecular formula is C<sub>28</sub>H<sub>31</sub>NO<sub>6</sub>.</p> <p>C<sub>28</sub>H<sub>31</sub>NO<sub>6</sub><br/>Cytochalasins Z<sub>28</sub></p>                   | <i>Xylaria</i> sp. XC16 | Brine shrimp toxicity, no phytotoxicity, antipathogen | 102 |
| 380 |  <p>Chemical structure of Cytochalasin Z<sub>18</sub>, a bicyclic compound with a piperidine ring fused to a cyclohexane ring. It features a benzyl group, a methoxycarbonyl group, and a long unsaturated side chain with a terminal methyl group and a methoxy group. The molecular formula is C<sub>31</sub>H<sub>43</sub>NO<sub>9</sub>.</p> <p>C<sub>31</sub>H<sub>43</sub>NO<sub>9</sub><br/>Cytochalasin Z<sub>18</sub></p>  | <i>Xylaria</i> sp. XC16 | Brine shrimp toxicity, no phytotoxicity, antipathogen | 102 |
| 381 |  <p>Chemical structure of <i>seco</i>-cytochalasin E, a bicyclic compound with a piperidine ring fused to a cyclohexane ring. It features a benzyl group, a methoxycarbonyl group, and a long unsaturated side chain with a terminal methyl group and an aldehyde group. The molecular formula is C<sub>29</sub>H<sub>37</sub>NO<sub>8</sub>.</p> <p>C<sub>29</sub>H<sub>37</sub>NO<sub>8</sub><br/><i>seco</i>-cytochalasin E</p> | <i>Xylaria</i> sp. XC16 | Brine shrimp toxicity, no phytotoxicity, antipathogen | 102 |

|     |                                                                                                                                                                                                                                                                                                                                                                                   |                          |              |     |
|-----|-----------------------------------------------------------------------------------------------------------------------------------------------------------------------------------------------------------------------------------------------------------------------------------------------------------------------------------------------------------------------------------|--------------------------|--------------|-----|
| 382 | 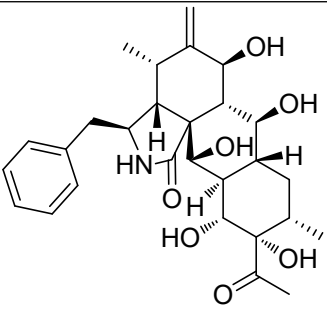 <p>Chemical structure of Curtachalasin A, a complex polycyclic molecule with a benzyl group, multiple hydroxyl groups, and a methyl ketone group. The structure is shown with stereochemistry indicated by wedges and dashes.</p> <p><math>C_{28}H_{37}NO_7</math><br/>Curtachalasin A</p>      | <i>Xylaria curta</i> E10 | Antifungal   | 103 |
| 383 |  <p>Chemical structure of Curtachalasin B, similar to Curtachalasin A but with a different ring saturation and a different methyl group placement. It features a benzyl group, multiple hydroxyl groups, and a methyl ketone group.</p> <p><math>C_{28}H_{35}NO_6</math><br/>Curtachalasin B</p> | <i>Xylaria curta</i> E10 | Antifungal   | 103 |
| 384 |  <p>Chemical structure of Curtachalasin B, a complex polycyclic molecule with a benzyl group, multiple hydroxyl groups, and a methyl ketone group. The structure is shown with stereochemistry indicated by wedges and dashes.</p> <p><math>C_{28}H_{35}NO_4</math><br/>Curtachalasin B</p>     | <i>Xylaria striata</i>   | Cytotoxicity | 104 |

|     |                                                                                                                                                                                                                                                                                                                                                                                              |                          |              |     |
|-----|----------------------------------------------------------------------------------------------------------------------------------------------------------------------------------------------------------------------------------------------------------------------------------------------------------------------------------------------------------------------------------------------|--------------------------|--------------|-----|
| 385 | 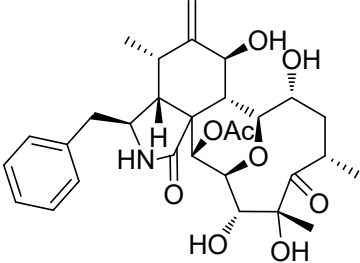 <p>Chemical structure of Cytochalasin D1, a bicyclic compound with a decalin core, an acetate group (OAc), a benzyl group, and multiple hydroxyl groups. The structure is shown with stereochemistry indicated by wedges and dashes.</p> <p><math>C_{30}H_{39}NO_9</math><br/>Cytochalasin D1</p>          | <i>Xylaria cf. curta</i> | Cytotoxicity | 105 |
| 386 |  <p>Chemical structure of Cytochalasin C1, a bicyclic compound similar to D1 but with a methyl group at the 10-position of the decalin ring. It features an acetate group (OAc), a benzyl group, and multiple hydroxyl groups.</p> <p><math>C_{30}H_{39}NO_9</math><br/>Cytochalasin C1</p>                 | <i>Xylaria cf. curta</i> | Cytotoxicity | 105 |
| 387 |  <p>Chemical structure of Xylarichalasin A, a bicyclic compound with a decalin core, an acetate group (OAc), a benzyl group, and multiple hydroxyl groups. It also features a chlorine atom (Cl) at the 10-position of the decalin ring.</p> <p><math>C_{30}H_{35}Cl_2NO_6</math><br/>Xylarichalasin A</p> | <i>Xylaria cf. curta</i> | Cytotoxicity | 106 |

|     |                                                                                                                                                                                                                                                                                                                                                                   |                                                          |                           |       |
|-----|-------------------------------------------------------------------------------------------------------------------------------------------------------------------------------------------------------------------------------------------------------------------------------------------------------------------------------------------------------------------|----------------------------------------------------------|---------------------------|-------|
| 388 | 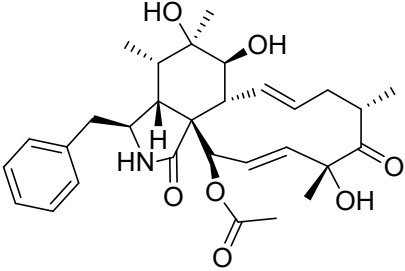 <p>Chemical structure of Cytochalasin P, a bicyclic compound with a benzyl group, a hydroxyl group, and a side chain with a double bond and a methyl group. The molecular formula is <math>C_{30}H_{39}NO_7</math>.</p> <p><math>C_{30}H_{39}NO_7</math><br/>Cytochalasin P</p> | <i>Xylaria longipes</i> , <i>Xylaria arbuscula</i> GZS74 | Cytotoxicity              | 56,57 |
| 389 |  <p>Chemical structure of 7-O-acetylcytochalasin D, similar to Cytochalasin P but with an acetyl group at the 7-position. The molecular formula is <math>C_{32}H_{39}NO_7</math>.</p> <p><math>C_{32}H_{39}NO_7</math><br/>7-O-acetylcytochalasin D</p>                          | <i>Xylaria longipes</i>                                  | Displayed no cytotoxicity | 56    |
| 390 |  <p>Chemical structure of 6,7-dihydro-7-oxo-cytochalasin C, similar to Cytochalasin P but with a ketone group at the 7-position. The molecular formula is <math>C_{30}H_{37}NO_6</math>.</p> <p><math>C_{30}H_{37}NO_6</math><br/>6,7-dihydro-7-oxo-cytochalasin C</p>          | <i>Xylaria longipes</i> , <i>Xylaria arbuscula</i> GZS74 | Cytotoxicity              | 56,57 |

|     |                                                                                                                                                                                                                                                                                                                                                                                           |                         |                           |    |
|-----|-------------------------------------------------------------------------------------------------------------------------------------------------------------------------------------------------------------------------------------------------------------------------------------------------------------------------------------------------------------------------------------------|-------------------------|---------------------------|----|
| 391 | 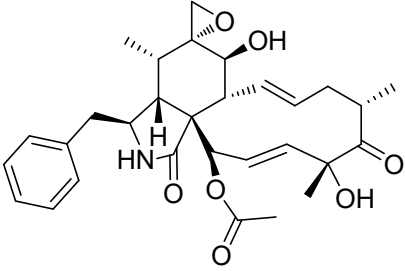 <p>Chemical structure of 6,12-epoxycytochalasin D, a complex polyketide with a bicyclic core, a phenyl group, and an epoxide ring. The structure is shown with stereochemistry indicated by wedges and dashes.</p> <p><math>C_{30}H_{37}NO_7</math><br/>6,12-epoxycytochalasin D</p>                    | <i>Xylaria longipes</i> | Displayed no cytotoxicity | 56 |
| 392 |  <p>Chemical structure of 6-epi-cytochalasin P, a complex polyketide with a bicyclic core, a phenyl group, and a hydroxyl group at the 6-position. The structure is shown with stereochemistry indicated by wedges and dashes.</p> <p><math>C_{30}H_{39}NO_7</math><br/>6-epi-cytochalasin P</p>         | <i>Xylaria longipes</i> | Displayed no cytotoxicity | 56 |
| 393 |  <p>Chemical structure of 7-O-acetylcytochalasin P, a complex polyketide with a bicyclic core, a phenyl group, and an acetyl group at the 7-position. The structure is shown with stereochemistry indicated by wedges and dashes.</p> <p><math>C_{32}H_{41}NO_8</math><br/>7-O-acetylcytochalasin P</p> | <i>Xylaria longipes</i> | Displayed no cytotoxicity | 56 |

|     |                                                                                                                                                                                                                                                                                                                                                 |                                                  |                           |       |
|-----|-------------------------------------------------------------------------------------------------------------------------------------------------------------------------------------------------------------------------------------------------------------------------------------------------------------------------------------------------|--------------------------------------------------|---------------------------|-------|
| 394 | 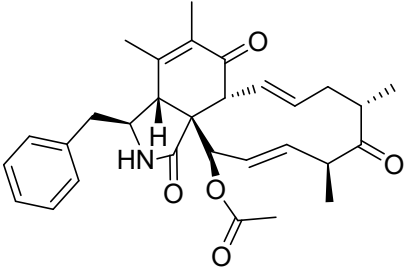 <p>Chemical structure of 7-oxo-cytochalasin C, a complex polyketide with a central bicyclic core, a phenyl group, and a long side chain with multiple methyl and hydroxyl substituents.</p> <p><math>C_{30}H_{35}NO_5</math><br/>7-oxo-cytochalasin C</p>     | <i>Xylaria longipes</i>                          | Displayed no cytotoxicity | 56    |
| 395 |  <p>Chemical structure of 12-hydroxylcytochalasin Q, similar to 7-oxo-cytochalasin C but with an additional hydroxyl group at the 12-position and a different side chain configuration.</p> <p><math>C_{30}H_{37}NO_7</math><br/>12-hydroxylcytochalasin Q</p> | <i>Xylaria longipes, Xylaria arbuscula</i> GZS74 | Cytotoxicity              | 56,57 |
| 396 |  <p>Chemical structure of Curtachalasin C, featuring a different bicyclic core with a hydroxyl group and a methoxy group, and a side chain with a benzyl group.</p> <p><math>C_{29}H_{33}NO_4</math><br/>Curtachalasin C</p>                                  | <i>Xylaria cf. curta</i>                         | Antifungal                | 107   |

|     |                                                                                                                                                                                                                                                                                                                                                                                                                 |                          |                                                     |     |
|-----|-----------------------------------------------------------------------------------------------------------------------------------------------------------------------------------------------------------------------------------------------------------------------------------------------------------------------------------------------------------------------------------------------------------------|--------------------------|-----------------------------------------------------|-----|
| 397 | 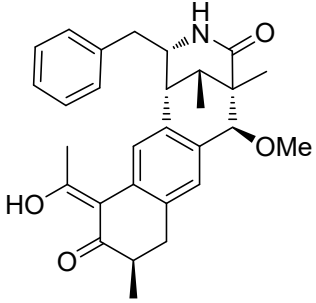 <p>Chemical structure of Curtachalasin D, a complex molecule featuring a central bicyclic core with a hydroxyl group, a methyl group, and a methoxy group. It is substituted with a side chain containing a benzyl group, a secondary amide, and a methyl group.</p> <p><math>C_{29}H_{33}NO_4</math><br/>Curtachalasin D</p> | <i>Xylaria cf. curta</i> | Not determined for any relevant biological activity | 107 |
| 398 |  <p>Chemical structure of Curtachalasin E, similar to Curtachalasin D but with a hydroxyl group instead of a methoxy group on the side chain and an additional hydroxyl group on the bicyclic core.</p> <p><math>C_{28}H_{33}NO_5</math><br/>Curtachalasin E</p>                                                               | <i>Xylaria cf. curta</i> | Antifungal                                          | 107 |
| 399 |  <p>Chemical structure of 19-epi-cytochalasin P1, a highly complex molecule with multiple stereocenters, hydroxyl groups, an acetate group, and a benzyl group.</p> <p><math>C_{30}H_{39}NO_8</math><br/>19-epi-cytochalasin P1</p>                                                                                           | <i>Xylaria cf. curta</i> | Cytotoxicity                                        | 99  |



|     |                                                                                                                                                                                                                    |                                                                   |                                       |        |
|-----|--------------------------------------------------------------------------------------------------------------------------------------------------------------------------------------------------------------------|-------------------------------------------------------------------|---------------------------------------|--------|
| 400 | 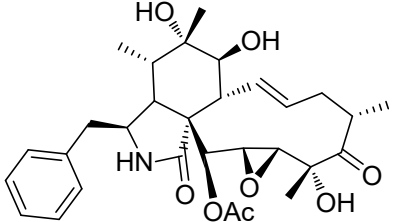 <p style="text-align: center;"> <math>C_{30}H_{39}NO_8</math><br/>         6-epi-19,20-epoxycytochalasin P       </p>            | <i>Xylaria cf. curta</i> , <i>Xylaria karyophthora</i> NRRL 66613 | Cytotoxicity, actin disruption effect | 99,100 |
| 401 |  <p style="text-align: center;"> <math>C_{32}H_{41}NO_9</math><br/>         7-O-acetyl-6-epi-19,20-epoxycytochalasin P       </p> | <i>Xylaria cf. curta</i>                                          | Cytotoxicity                          | 99     |
| 402 |  <p style="text-align: center;"> <math>C_{32}H_{41}NO_9</math><br/>         7-O-acetyl 19-epi-cytochalasin P1       </p>         | <i>Xylaria cf. curta</i>                                          | Displayed no cytotoxicity             | 99     |
| 403 |  <p style="text-align: center;"> <math>C_{32}H_{41}NO_9</math> </p>                                                             | <i>Xylaria cf. curta</i>                                          | Displayed no cytotoxicity             | 99     |

|     |                                                                                                                                                                                                       |                          |                           |    |
|-----|-------------------------------------------------------------------------------------------------------------------------------------------------------------------------------------------------------|--------------------------|---------------------------|----|
|     | 6- <i>O</i> -acetyl-6-epi-19,20-epoxycytochalasin P                                                                                                                                                   |                          |                           |    |
| 404 | 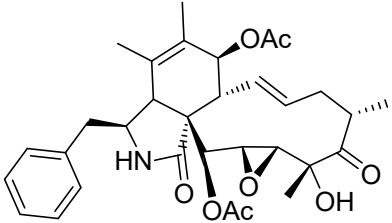 <p><math>C_{32}H_{39}NO_8</math></p> <p>7-<i>O</i>-acetyl-19,20-epoxycytochalasin C</p>                             | <i>Xylaria cf. curta</i> | Displayed no cytotoxicity | 99 |
| 405 |  <p><math>C_{32}H_{39}NO_8</math></p> <p>7-<i>O</i>-acetyl 19,20-epoxycytochalasin C<br/>(exomethylene analogue)</p> | <i>Xylaria cf. curta</i> | Cytotoxicity              | 99 |
| 406 |  <p><math>C_{28}H_{35}NO_6</math></p> <p>deacetyl-5,6-dihydro-7-oxo-19,20-epoxycytochalasin C</p>                   | <i>Xylaria cf. curta</i> | Displayed no cytotoxicity | 99 |

|     |                                                                                                                                                                                                                                |                                                           |                                                    |        |
|-----|--------------------------------------------------------------------------------------------------------------------------------------------------------------------------------------------------------------------------------|-----------------------------------------------------------|----------------------------------------------------|--------|
| 407 | 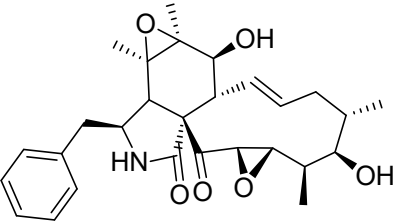 <p style="text-align: center;"> <math>C_{28}H_{35}NO_6</math><br/>           18-deoxy-21-oxo-deacetyl-19,20-epoxycytochalasin N         </p> | <i>Xylaria cf. curta</i>                                  | Displayed no cytotoxicity                          | 99     |
| 408 |  <p style="text-align: center;"> <math>C_{30}H_{37}NO_5</math><br/>           18-desoxy-19,20 epoxycytochalasin C         </p>                | <i>Xylaria cf. curta</i>                                  | Displayed no cytotoxicity                          | 99     |
| 409 |  <p style="text-align: center;"> <math>C_{30}H_{37}NO_7</math><br/>           5,6-dihydro-7-oxo-19,20-epoxycytochalasin C         </p>       | <i>Xylaria cf. curta, Xylaria karyophthora</i> NRRL 66613 | Cytotoxicity, antibiofilm, actin disruption effect | 99,100 |

|     |                                                                                                                                                                                               |                                                                                           |                                                     |                                            |
|-----|-----------------------------------------------------------------------------------------------------------------------------------------------------------------------------------------------|-------------------------------------------------------------------------------------------|-----------------------------------------------------|--------------------------------------------|
| 410 | 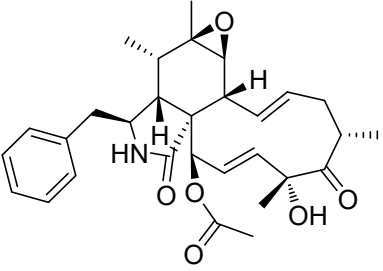 <p data-bbox="495 475 696 539"> <math>C_{30}H_{37}NO_6</math><br/>           Cytochalasin Q         </p>    | <p data-bbox="943 331 1323 400"><i>Xylaria</i> sp, <i>Xylaria arbuscula</i><br/>GZS74</p> | <p data-bbox="1442 352 1603 384">Cytotoxicity</p>   | <p data-bbox="1845 347 1899 371">57,84</p> |
| 411 |  <p data-bbox="483 833 707 896"> <math>C_{30}H_{37}NO_7</math><br/>           Arbuschalsin A         </p>    | <p data-bbox="965 705 1301 737"><i>Xylaria arbuscula</i> GZS74</p>                        | <p data-bbox="1442 705 1603 737">Cytotoxicity</p>   | <p data-bbox="1856 705 1883 729">57</p>    |
| 412 |  <p data-bbox="483 1197 707 1260"> <math>C_{30}H_{37}NO_7</math><br/>           Arbuschalsin B         </p> | <p data-bbox="965 1069 1301 1101"><i>Xylaria arbuscula</i> GZS74</p>                      | <p data-bbox="1442 1069 1603 1101">Cytotoxicity</p> | <p data-bbox="1856 1069 1883 1093">57</p>  |

|     |                                                                                                                                                                                                                                                                                                                                                                                                                                     |                                |              |    |
|-----|-------------------------------------------------------------------------------------------------------------------------------------------------------------------------------------------------------------------------------------------------------------------------------------------------------------------------------------------------------------------------------------------------------------------------------------|--------------------------------|--------------|----|
| 413 | 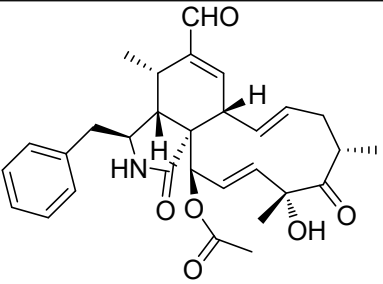 <p>Chemical structure of Arbuschalsin C, a complex polycyclic molecule. It features a central ring system with a benzyl group, a formyl group (CHO), a hydroxyl group (OH), and an acetate group (OAc). The structure is highly substituted and contains multiple stereocenters.</p> <p><math>C_{30}H_{35}NO_6</math><br/>Arbuschalsin C</p>      | <i>Xylaria arbuscula</i> GZS74 | Cytotoxicity | 57 |
| 414 |  <p>Chemical structure of Arbuschalsin D, similar to Arbuschalsin C but with a different substitution pattern. It features a central ring system with a benzyl group, a formyl group (CHO), a hydroxyl group (OH), and an acetate group (OAc).</p> <p><math>C_{30}H_{37}NO_6</math><br/>Arbuschalsin D</p>                                         | <i>Xylaria arbuscula</i> GZS74 | Cytotoxicity | 57 |
| 415 |  <p>Chemical structure of Cytochalasin D 13,14-epoxid, a complex polycyclic molecule. It features a central ring system with a benzyl group, a hydroxyl group (OH), and an acetate group (OAc). The structure is highly substituted and contains multiple stereocenters.</p> <p><math>C_{30}H_{37}NO_7</math><br/>Cytochalasin D 13,14-epoxid</p> | <i>Xylaria arbuscula</i> GZS74 | Cytotoxicity | 57 |

|     |                                                                                                                                                                                               |                                |                         |     |
|-----|-----------------------------------------------------------------------------------------------------------------------------------------------------------------------------------------------|--------------------------------|-------------------------|-----|
| 416 | 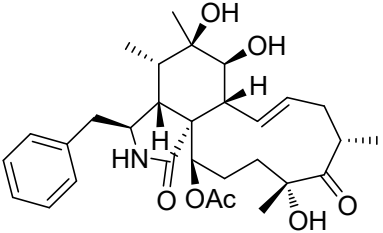 <p data-bbox="495 438 696 504"> <math>C_{30}H_{41}NO_7</math><br/>           Cytochalasin O         </p>    | <i>Xylaria arbuscula</i> GZS74 | Cytotoxicity            | 57  |
| 417 |  <p data-bbox="495 718 696 786"> <math>C_{22}H_{29}NO_4</math><br/>           Lagambasine A         </p>     | <i>Xylaria</i> sp. WH2D4       | Displayed no antifungal | 108 |
| 418 |  <p data-bbox="495 1000 696 1069"> <math>C_{22}H_{29}NO_4</math><br/>           Lagambasine B         </p>   | <i>Xylaria</i> sp. WH2D4       | Displayed no antifungal | 108 |
| 419 |  <p data-bbox="495 1283 696 1345"> <math>C_{22}H_{31}NO_4</math><br/>           Lagambasine C         </p> | <i>Xylaria</i> sp. WH2D4       | Displayed no antifungal | 108 |

|     |                                                                                                                                                                                                 |                                        |                                                    |     |
|-----|-------------------------------------------------------------------------------------------------------------------------------------------------------------------------------------------------|----------------------------------------|----------------------------------------------------|-----|
| 420 | 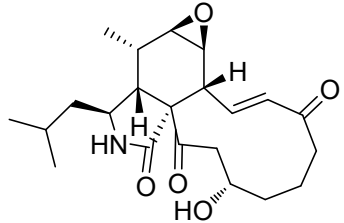 <p data-bbox="488 427 696 491"> <math>C_{22}H_{31}NO_5</math><br/> Lagambasine D </p>                         | <i>Xylaria</i> sp. WH2D4               | Displayed no antifungal                            | 108 |
| 421 |  <p data-bbox="501 746 689 810"> <math>C_{30}H_{39}NO_8</math><br/> karyochalasin </p>                         | <i>Xylaria karyophthora</i> NRRL 66613 | Cytotoxicity, actin disruption effect              | 100 |
| 422 |  <p data-bbox="353 1061 831 1125"> <math>C_{28}H_{35}NO_6</math><br/> Deacetyl 19,20-epoxycytochalasin C </p> | <i>Xylaria karyophthora</i> NRRL 66613 | Cytotoxicity, antibiofilm, actin disruption effect | 100 |
| 423 |                                                                                                              | <i>Xylaria karyophthora</i> NRRL 66613 | Actin disruption effect                            | 100 |

|     |                                                                                                                                      |                                           |                         |     |
|-----|--------------------------------------------------------------------------------------------------------------------------------------|-------------------------------------------|-------------------------|-----|
|     | $C_{28}H_{35}NO_6$<br>Engleromycin                                                                                                   |                                           |                         |     |
| 424 | 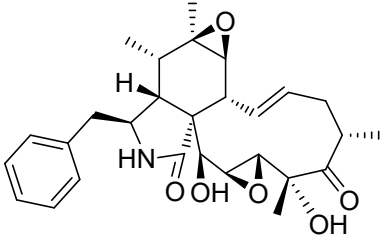<br>$C_{28}H_{35}NO_6$<br>19,20-epoxycytochalasin Q | <i>Xylaria karyophthora</i> NRRL<br>66613 | Actin disruption effect | 100 |



## References

- 1 Y. C. Li, J. Yang, Y. Z. Zhao, Q. Di Ma, B. G. Liu and J. L. Sun, *J. Fungi*, 2023, **9**, 374.
- 2 A. Evidente, A. Andolfi, M. Vurro, M. C. Zonno and A. Motta, *J. Nat. Prod.*, **66**, 1540–1544.
- 3 A. Cimmino, A. Andolfi, A. Berestetskiy and A. Evidente, *J. Agric. Food Chem.*, 2008, **56**, 6304–6309.
- 4 A. Evidente, A. Andolfi, M. Vurro, M. C. Zonno and A. Motta, *Phytochemistry*, 2002, **60**, 45–53.
- 5 H. Guo, Q. P. Diao, B. Zhang and K. H. Wang, *Phytochem. Lett.*, 2021, **46**, 162–165.
- 6 R. Kretz, L. Wendt, S. Wongkanoun, J. J. Luangsa-Ard, F. Surup, S. E. Helaly, S. R. Noumeur, M. Stadler and T. E. B. Stradal, *Biomolecules*, 2019, **9**, 73.
- 7 S.-Q. Teng, X.-F. Zhang, H.-F. Li, X.-W. Luo, Y.-S. Zhou, H. Liu, J.-K. Liu and T. Feng, *Phytochemistry*, 2023, **215**, 113861.
- 8 K. Y. M. Garcia, M. T. J. Quimque, C. Lambert, K. Schmidt, G. Primahana, T. E. B. Stradal, A. Ratzenböck, H. M. Dahse, C. Phukhamsakda, M. Stadler, F. Surup and A. P. G. Macabeo, *J. Fungi*, 2022, **8**, 560.
- 9 M. Stadler, D. N. Quang, A. Tomita, T. Hashimoto and Y. Asakawa, *Mycol. Res.*, 2006, **110**, 811–820.
- 10 A. Evidente, A. Cimmino, A. Andolfi, A. Berestetskiy and A. Motta, *Tetrahedron*, 2011, **67**, 1557–1563.
- 11 X. Peng, J. Chang, Y. Gao, F. Duan and H. Ruan, *Chin. Chem. Lett.*, 2022, **33**, 4572–4576.
- 12 D. Zhang, H. Ge, D. Xie, R. Chen, J. H. Zou, X. Tao and J. Dai, *Org. Lett.*, 2013, **15**, 1674–1677.
- 13 D. Zhang, X. Tao, R. Chen, J. Liu, L. Li, X. Fang, L. Yu and J. Dai, *Org. Lett.*, 2015, **17**, 4304–4307.
- 14 D. Zhang, X. Tao, J. Liu, R. Chen, M. Zhang, L. Li, X. Fang, L. Y. Yu and J. Dai, *Tetrahedron Lett.*, 2016, **57**, 796–799.
- 15 J. Liu, D. Zhang, M. Zhang, X. Liu, R. Chen, J. Zhao, L. Li, N. Wang and J. Dai, *Tetrahedron Lett.*, 2016, **57**, 5794–5797.
- 16 C. Zhao, G. Liu, X. Liu, L. Zhang, L. Li and L. Liu, *RSC Adv.*, 2020, **10**, 40384–40390.
- 17 D. Xu, M. Luo, F. Liu, D. Wang, X. Pang, T. Zhao, L. Xu, X. Wu, M. Xia and X. Yang, *Sci Rep*, 2017, **7**, 1–9.
- 18 A. Sallam, M. A. Sabry and A. A. Galala, *Chem. Biodivers.*, 2021, **18**, e2000957.
- 19 D. Xu, X. Zhang, X. Shi, P. J. Xian, L. Hong, Y. D. Tao and X. L. Yang, *Phytochem. Lett.*, 2019, **32**, 52–55.
- 20 A. Höltzel, D. G. Schmid, G. J. Nicholson, P. Krastel, A. Zeeck, K. Gebhardt, H. P. Fiedler and G. Jung, *J. Antibiot.*, 2004, **57**, 715–720.
- 21 K. Gebhardt, J. Schimana, A. Höltzel, K. Dettner, S. Draeger, W. Beil, J. Rheinheimer and H. P. Fiedler, *J. Antibiot.*, 2004, **57**, 707–714.
- 22 Z. Wu, Q. Tong, X. Zhang, P. Zhou, C. Dai, J. Wang, C. Chen, H. Zhu and Y. Zhang, *Org. Lett.*, 2019, **21**, 1026–1030.
- 23 G. Ding, L. Chen, A. Chen, X. Tian, X. Chen, H. Zhang, H. Chen, X. Z. Liu, Y. Zhang and Z. M. Zou, *Fitoterapia*, 2012, **83**, 541–544.

- 24 G. Ding, H. Wang, L. Li, A. J. Chen, L. Chen, H. Chen, H. Zhang, X. Liu and Z. Zou, *Eur. J. Org. Chem.*, 2012, **2012**, 2516–2519.
- 25 G. Ding, H. Wang, L. Li, B. Song, H. Chen, H. Zhang, X. Liu and Z. Zou, *J. Nat. Prod.*, 2014, **77**, 164–167.
- 26 Z. Lin, T. Zhu, H. Wei, G. Zhang, H. Wang and Q. Gu, *European J. Org. Chem.*, 2009, **2009**, 3045–3051.
- 27 L. Wang, J. Yang, J. P. Huang, J. Li, J. Luo, Y. Yan and S. X. Huang, *Org. Lett.*, 2020, **22**, 7930–7935.
- 28 J. Liu, Z. Hu, H. Huang, Z. Zheng and Q. Xu, *J. Antibiot.*, 2011, **65**, 49–52.
- 29 H. Zhu, C. Chen, Y. Xue, Q. Tong, X. N. Li, X. Chen, J. Wang, G. Yao, Z. Luo and Y. Zhang, *Angew. Chem.-Int. Edit.*, 2015, **54**, 13374–13378.
- 30 L. Yu, W. Ding and Z. Ma, *Nat. Prod. Res.*, 2016, **30**, 1718–1723.
- 31 J. Wang, Z. Wang, Z. Ju, J. Wan, S. Liao, X. Lin, T. Zhang, X. Zhou, H. Chen, Z. Tu and Y. Liu, *Planta Med.*, 2015, **81**, 160–166.
- 32 Y. Shu, J. P. Wang, B. X. Li, J. L. Gan, H. Ding, R. Liu, L. Cai and Z. T. Ding, *Phytochemistry*, 2022, **194**, 113009.
- 33 S. C. Heard, G. Wu and J. M. Winter, *J. Antibiot.*, 2020, **73**, 803–807.
- 34 L. Chen, Y. T. Liu, B. Song, H. W. Zhang, G. Ding, X. Z. Liu, Y. C. Gu and Z. M. Zou, *Fitoterapia*, 2014, **96**, 115–122.
- 35 R. Orfali, S. Perveen, M. F. Khan, A. F. Ahmed, S. Tabassum, P. Luciano, G. Chianese and O. Tagliatalata-Scafati, *Phytochemistry*, 2021, **192**, 112952.
- 36 X. Zhang, Z. Wu, A. Bao, Z. Zhao, Y. Chen, H. Zhao, J. Wang, C. Chen, Q. Tong, H. Zhu and Y. Zhang, *Org. Chem. Front.*, 2022, **9**, 2585–2592.
- 37 C. Iwamoto, T. Yamada, Y. Ito, K. Minoura and A. Numata, *Tetrahedron*, 2001, **57**, 2997–3004.
- 38 X. W. Luo, C. H. Gao, H. M. Lu, J. M. Wang, Z. Q. Su, H. M. Tao, X. F. Zhou, B. Yang and Y. H. Liu, *Molecules*, 2020, **25**, 1237.
- 39 T. Li, Y. Wang, L. Li, M. Tang, Q. Meng, C. Zhang, E. Hua, Y. Pei and Y. Sun, *Mar. Drugs*, 2021, **19**, 438.
- 40 X. Ding, W. Ye, B. Tan, Q. Song, Y. Chen, W. Liu, L. Sun, W. Tang, Y. Qiao, Q. Zhang, H. Zhang, Y. Wang, W. Zhang, C. Zhang and W. Zhang, *Chin. J. Chem.*, 2023, **41**, 915–923.
- 41 T. Lin, G. Wang, D. Zeng and H. Chen, *Phytochem. Lett.*, 2015, **13**, 206–211.
- 42 D. N. Quang, T. Hashimoto, M. Tanaka, M. Baumgartner, M. Stadler and Y. Asakawa, *J. Nat. Prod.*, 2002, **65**, 1869–1874.
- 43 S. Xu, M. G. Hui, C. S. Yong, Y. Shen, H. Ding and X. T. Ren, *Chem. Biodivers.*, 2009, **6**, 739–745.
- 44 Y. F. Luo, M. Zhang, J. G. Dai, P. Pedpradab, W. J. Wang and J. Wu, *Phytochem. Lett.*, 2016, **17**, 162–166.
- 45 S. Gao, P. Wu, J. Xue, H. Li and X. Wei, *Phytochemistry*, 2022, **202**, 113295.
- 46 B. M. Kemkuignou, C. Lambert, K. Schmidt, L. Schweizer, E. G. M. Anoumedem, S. F. Kouam, M. Stadler, T. Stradal and Y. Marin-Felix, *Fitoterapia*, 2023, **166**, 105434.

- 47 Y. Hsiao, H.-S. Chang, T.-W. Liu, S.-Y. Hsieh, G.-F. Yuan, M.-J. Cheng and I.-S. Chen, *Rec. Nat. Prod.*, 2016, **10**, 189–194.
- 48 B. C. Yan, W. G. Wang, L. M. Kong, J. W. Tang, X. Du, Y. Li and P. T. Puno, *J. Fungi*, 2022, **8**, 543.
- 49 M. Stadler, J. Fournier, D. N. Quang and A. Y. Akulov, *Nat. Prod. Commun.*, 2007, **2**, 287–304.
- 50 B. C. Yan, W. G. Wang, D. B. Hu, X. Sun, L. M. Kong, X. N. Li, X. Du, S. H. Luo, Y. Liu, Y. Li, H. D. Sun and J. X. Pu, *Org. Lett.*, 2016, **18**, 1108–1111.
- 51 Q. L. Mou, S. X. Yang, T. Xiang, W. W. Liu, J. Yang, L. P. Guo, W. J. Wang and X. L. Yang, *Tetrahedron Lett.*, 2021, **87**, 153207.
- 52 X. Yang, P. Wu, J. Xue, H. Li and X. Wei, *Fitoterapia*, 2020, **145**, 104611.
- 53 K. T. Yuyama, L. Wendt, F. Surup, R. Kretz, C. Chepkirui, K. Wittstein, C. Boonlarpradab, S. Wongkanoun, J. Luangsa-Ard, M. Stadler and W. R. Abraham, *Biomolecules*, 2018, **8**, 129.
- 54 J. wei Tang, K. Hu, X. zheng Su, X. nian Li, B. chao Yan, H. dong Sun and P. tenzin Puno, *Tetrahedron*, 2020, **76**, 131475.
- 55 J. Kornsakulkarn, P. Auncharoen, A. Khonsanit, N. Boonyuen and C. Thongpanchang, *RSC Adv.*, 2023, **13**, 10564–10576.
- 56 W. X. Wang, Z. H. Li, J. He, T. Feng, J. Li and J. K. Liu, *Fitoterapia*, 2019, **137**, 104278.
- 57 J. H. Su, M. Q. Wang, Y. Z. Li, Y. S. Lin, J. Y. Gu, L. P. Zhu, W. Q. Yang, S. Q. Jiang, Z. X. Zhao and Z. H. Sun, *Fitoterapia*, 2022, **157**, 105124.
- 58 G. Ding, H. Lou Wang, L. Chen, A. J. Chen, J. Lan, X. D. Chen, H. W. Zhang, H. Chen, X. Z. Liu and Z. M. Zou, *J. Antibiot.*, 2012, **65**, 143–145.
- 59 C. Von Wallbrunn, H. Luftmann, K. Bergander and F. Meinhardt, *J. Gen. Appl. Microbiol.*, 2001, **47**, 33–38.
- 60 C. Chen, H. Zhu, X. N. Li, J. Yang, J. Wang, G. Li, Y. Li, Q. Tong, G. Yao, Z. Luo, Y. Xue and Y. Zhang, *Org. Lett.*, 2015, **17**, 644–647.
- 61 R. K. Dissanayake, P. B. Ratnaweera, D. E. Williams, C. D. Wijayarathne, R. L. C. Wijesundera, R. J. Andersen and E. D. de Silva, *Mycology*, 2016, **7**, 1.
- 62 J. F. Wang, R. Huang, S. S. Liu and S. H. Wu, *Chem. Nat. Compd.*, 2021, **57**, 1169–1174.
- 63 Y. Zhang, R. Tian, S. Liu, X. Chen, X. Liu and Y. Che, *Bioorg. Med. Chem. Lett.*, 2008, **16**, 2627–2634.
- 64 G. Ding, Y. C. Song, J. R. Chen, X. Chen, H. M. Ge, X. T. Wang and R. X. Tan, *J. Nat. Prod.*, 2006, **69**, 302–304.
- 65 C. Chen, H. Zhu, J. Wang, J. Yang, X. N. Li, J. Wang, K. Chen, Y. Wang, Z. Luo, G. Yao, Y. Xue and Y. Zhang, *Eur. J. Org. Chem.*, 2015, **2015**, 3086–3094.
- 66 S. Thohinung, S. Kanokmedhakul, K. Kanokmedhakul, V. Kukongviriyapan, O. Tusskorn and K. Soyong, *Arch. Pharm. Res.*, 2010, **33**, 1135–1141.
- 67 H. Li, J. Xiao, Y. Q. Gao, J. J. Tang, A. L. Zhang and J. M. Gao, *J. Agric. Food Chem.*, 2014, **62**, 3734–3741.
- 68 X. Yan, L. J. Wang, Z. Wu, Y. L. Wu, X. X. Liu, F. R. Chang, M. J. Fang and Y. K. Qiu, *J. Chromatogr. B*, 2016, **1033–1034**, 1–8.

- 69 X. Y. Wang, X. Yan, M. J. Fang, Z. Wu, D. Wang and Y. K. Qiu, *Nat. Prod. Res.*, 2017, **31**, 1669–1675.
- 70 W. Gao, Y. He, F. Li, C. Chai, J. Zhang, J. Guo, C. Chen, J. Wang, H. Zhu, Z. Hu and Y. Zhang, *Bioorganic Chem.*, 2019, **83**, 98–104.
- 71 Z. Zhang, X. Min, J. Huang, Y. Zhong, Y. Wu, X. Li, Y. Deng, Z. Jiang, Z. Shao, L. Zhang and F. He, *Mar. Drugs*, 2016, **14**, 233.
- 72 J. Qi, D. Wang, X. Yin, Q. Zhang and J. M. Gao, *Nat. Prod. Commun.*, 2020, **15**, 7.
- 73 J. Ji, C. Liu, X. He, G. Chen, L. Qin and C. Zheng, *Fitoterapia*, 2021, **151**, 104874.
- 74 Q. Guo, J. Chen, Y. Ren, Z. Yin, J. Zhang, B. Yang, X. Wang, W. Yin, W. Zhang, G. Ding and L. Chen, *Front. Chem.*, 2021, **9**, 620589.
- 75 A. X. Zhang, L. Feng, J. Wang, N. H. Tan and Z. Wang, *J. Asian Nat. Prod. Res.*, 2022, **24**, 769–776.
- 76 C. Chen, Q. Tong, H. Zhu, D. Tan, J. Zhang, Y. Xue, G. Yao, Z. Luo, J. Wang, Y. Wang and Y. Zhang, *Sci Rep*, 2016, **6**, 18711–18719.
- 77 C. M. Cui, X. M. Li, C. S. Li, P. Proksch and B. G. Wang, *J. Nat. Prod.*, 2010, **73**, 729–733.
- 78 Q. F. Guo, Z. H. Yin, J. J. Zhang, W. Y. Kang, X. W. Wang, G. Ding and L. Chen, *Molecules*, 2019, **24**, 3240.
- 79 C. Chen, J. Wang, J. Liu, H. Zhu, B. Sun, J. Wang, J. Zhang, Z. Luo, G. Yao, Y. Xue and Y. Zhang, *J. Nat. Prod.*, 2015, **78**, 1193–1201.
- 80 H. Dou, Y. Song, X. Liu, W. Gong, E. Li, R. Tan and Y. Hou, *Biol. Pharm. Bull.*, 2011, **34**, 1864–1873.
- 81 M. Xue, Q. Zhang, J. M. Gao, H. Li, J. M. Tian and G. Pescitelli, *Chirality*, 2012, **24**, 668–674.
- 82 W. Gao, W. Sun, F. Li, C. Chai, Y. He, J. Wang, Y. Xue, C. Chen, H. Zhu, Z. Hu and Y. Zhang, *Phytochemistry*, 2018, **156**, 106–115.
- 83 G. B. Xu, L. M. Li, T. Yang, G. L. Zhang and G. Y. Li, *Org. Lett.*, 2012, **14**, 6052–6055.
- 84 P. H. F. da Silva, F. M. A. da Silva and H. H. F. Koolen, *Chem. Nat. Compd.*, 2019, **55**, 592–593.
- 85 H. H. Wang, G. Li, Y. N. Qiao, Y. Sun, X. P. Peng and H. X. Lou, *Org. Lett.*, 2019, **21**, 3319–3322.
- 86 X. G. Peng, J. Liu, Y. Gao, F. Cheng, J. L. Chang, J. Chen, F. F. Duan and H. L. Ruan, *Org. Lett.*, 2020, **22**, 9665–9669.
- 87 W. Gao, R. Jiang, H. Zeng, J. Cao, Z. Hu and Y. Zhang, *Nat. Prod. Res.*, 2022, **38**, 1599–1605.
- 88 X. Peng, J. Liu, C. Qin, Q. Wu, W. Li, F. Mohammadipanah and H. Ruan, *Chin. J. Chem.*, 2022, **40**, 1909–1916.
- 89 C. C. Gu, J. Zeng, X. P. Peng, Y. J. Sun, S. Z. Yuan, X. N. Wang, R. S. Zhang, H. X. Lou and G. Li, *J. Org. Chem.*, 2023, **88**, 3185–3192.
- 90 A. Narmani, S. Pichai, P. Palani, M. Arzanlou, F. Surup and M. Stadler, *Mycol. Prog.*, 2019, **18**, 175–185.
- 91 M. J. Pourmoghaddam, G. Ekiz, C. Lambert, F. Surup, G. Primahana, K. Wittstein, S. A. Khodaparast, H. Voglmayr, I. Krisai-Greilhuber, T. E. B. Stradal and M. Stadler, *Mycol. Prog.*, 2022, **21**, 1–14.
- 92 J. T. Liu, B. Hu, Y. Gao, J. P. Zhang, B. H. Jiao, X. L. Lu and X. Y. Liu, *Chem. Biodivers.*, 2014, **11**, 800–806.

- 93 Y. Zhou, Y. X. Zhang, J. P. Zhang, H. B. Yu, X. Y. Liu, X. L. Lu and B. H. Jiao, *Nat. Prod. Res.*, 2017, **31**, 1676–1681.
- 94 L. J. Yang, H. X. Liao, M. Bai, G. L. Huang, Y. P. Luo, Y. Y. Niu, C. J. Zheng and C. Y. Wang, *Nat. Prod. Res.*, 2018, **32**, 208–213.
- 95 H. Van Trung, P. C. Kuo, N. N. Tuan, N. T. Ngan, N. Q. Trung, N. T. Thanh, H. V. Hai, D. L. Phuong, B. L. Giang, Y. C. Li, T. S. Wu and T. D. Thang, *Nat. Prod. Commun.*, 2019, **14**, 5.
- 96 C. Lambert, M. J. Pourmoghaddam, M. Cedeño-Sanchez, F. Surup, S. A. Khodaparast, I. Krisai-Greilhuber, H. Voglmayr, T. E. B. Stradal and M. Stadler, *J. Fungi*, 2021, **7**, 131.
- 97 N. Sharma, M. Kushwaha, D. Arora, S. Jain, V. Singamaneni, S. Sharma, R. Shankar, S. Bhushan, P. Gupta and S. Jaglan, *J. Appl. Microbiol.*, 2018, **125**, 111–120.
- 98 M. Kushwaha, A. Qayum, S. K. Jain, J. Singh, A. K. Srivastava, S. Srivastava, N. Sharma, V. Abrol, R. Malik, S. K. Singh, R. A. Vishwakarma and S. Jaglan, *ACS Omega*, 2021, **6**, 3717–3726.
- 99 W. X. Wang, Z. H. Li, H. L. Ai, J. Li, J. He, Y. S. Zheng, T. Feng and J. K. Liu, *Fitoterapia*, 2019, **137**, 104253.
- 100 C. Lambert, L. Shao, H. Zeng, F. Surup, P. Saetang, M. C. Aime, D. R. Husbands, K. Rottner, T. E. B. Stradal and M. Stadler, *Mycologia*, 2023, **115**, 277–287.
- 101 M. Kushwaha, A. Qayum, N. Sharma, V. Abrol, P. Choudhary, M. Murtaza, S. K. Singh, R. A. Vishwakarma, U. Goutam, S. K. Jain and S. Jaglan, *ACS Omega*, 2022, **7**, 29135–29141.
- 102 Q. Zhang, J. Xiao, Q. Q. Sun, J. C. Qin, G. Pescitelli and J. M. Gao, *J. Agric. Food Chem.*, 2014, **62**, 10962–10969.
- 103 W. X. Wang, Z. H. Li, T. Feng, J. Li, H. Sun, R. Huang, Q. X. Yuan, H. L. Ai and J. K. Liu, *Org. Lett.*, 2018, **20**, 7758–7761.
- 104 C. W. Lei, Z. Q. Yang, Y. P. Zeng, Y. Zhou, Y. Huang, X. S. He, G. Y. Li and X. H. Yuan, *Nat. Prod. Res.*, 2018, **32**, 7–13.
- 105 W. X. Wang, T. Feng, Z. H. Li, J. Li, H. L. Ai and J. K. Liu, *Tetrahedron Lett.*, 2019, **60**, 150952.
- 106 W. X. Wang, X. Lei, Y. L. Yang, Z. H. Li, H. L. Ai, J. Li, T. Feng and J. K. Liu, *Org. Lett.*, 2019, **21**, 6957–6960.
- 107 W. X. Wang, X. Lei, H. L. Ai, X. Bai, J. Li, J. He, Z. H. Li, Y. S. Zheng, T. Feng and J. K. Liu, *Org. Lett.*, 2019, **21**, 1108–1111.
- 108 W. Hinterdobler, M. Bacher, B. B. Shi, D. Baurecht, I. Krisai-Greilhuber, M. Schmoll, L. Brecker, K. Valant-Vetschera and J. Schinnerl, *Nat. Prod. Res.*, 2023, **37**, 85–92.
